# Supplementary material
Source: Research Square preprint supplement (doi:10.21203/rs.3.rs-9009137/v1)
Supplement: Supplementary file 1 [file 12f2de00dd5dcf22b78c117a.xlsx]

## Sheet: Supplementary Data 1
Supplementary Data 1. SNP markers within 2000 base pairs upstream and downstream of the physical locations of 331 wheat NPF gene.
Gene name	Gene ID	Chromosome Location	SNP Marker name
TaNPF1.1	TraesCS3A02G304400	chr3A:540652271..540658804	AX-108788697	AX-89447133	AX-109400823	AX-109428643	AX-110102074	AX-110909122	AX-109345164	AX-108766941	AX-110378382	AX-109466882	AX-110633279	AX-111723381	AX-109544847	AX-108815848	AX-108911413	AX-109983227	AX-110954072	AX-111189181	AX-108821448	AX-111624727	AX-110078132
TaNPF1.1	TraesCS3B02G332100	chr3B:537465105..537471520	AX-109029004	AX-111723381	AX-109021393	AX-109466882	AX-110633279
TaNPF1.1	TraesCS3D02G297600	chr3D:411000863..411007347	AX-111723381	AX-110633279	AX-109466882	AX-89447133
TaNPF1.2	TraesCS3A02G304500	chr3A:540657253..540663674	AX-109544847	AX-108815848	AX-108911413	AX-109983227	AX-110954072	AX-111189181	AX-108821448	AX-111624727	AX-110078132	AX-110979890	AX-110946916	AX-110043313
TaNPF1.2	TraesCS3B02G332000	chr3B:537431725..537438208	AX-110079179	AX-110364211
TaNPF1.2	TraesCS3D02G297400	chr3D:410989084..410995661	AX-94804339	AX-111067724	AX-111624727
TaNPF2.1	TraesCS5A02G004400	chr5A:3083412..3090853	AX-110436209	AX-111543629	AX-109357912	AX-110048757	AX-94517461	AX-95118129	AX-94564332	AX-94743799	AX-94623642	AX-95092389	AX-95012633	AX-94743799	AX-109569287	AX-95107772	AX-94603936	AX-95111513	AX-95238592
TaNPF2.1	TraesCS5B02G001100	chr5B:858861..867647	AX-108881968	AX-108757777	AX-110393482	AX-108788735	AX-94603936	AX-95107772	AX-109025834	AX-95012633	AX-95013527	AX-94976155	AX-111019295	AX-110017426	AX-109896930	AX-109323182
TaNPF2.1	TraesCS5D02G012500	chr5D:6818550..6826003	AX-95238592	AX-95111513	AX-94603936	AX-109569287	AX-95012633	AX-94837393	AX-94623642	AX-95013527	AX-94976155
TaNPF2.2	TraesCS5A02G037900	chr5A:34978804..34988700	AX-94603936	AX-95107772	AX-94577594	AX-95092389
TaNPF2.2	TraesCS5B02G039100	chr5B:44135348..44144133	AX-94405729	AX-94843710	AX-94593605	AX-94432091	AX-110003355	AX-89656847	AX-110663085	AX-95107772	AX-94603936
TaNPF2.2	TraesCS5D02G045300	chr5D:44567466..44575914	AX-94603936	AX-95107772	AX-94577594	AX-94600143	AX-94754146	AX-94469499
TaNPF2.3	TraesCS2A02G045500	chr2A:17867278..17873731	AX-111941714
TaNPF2.3	TraesCS2B02G057700	chr2B:28171682..28177998	AX-109404420	AX-108793092	AX-110630185	AX-109393924	AX-109921551
TaNPF2.3	TraesCS2D02G044200	chr2D:15987772..15993928	AX-109359471	AX-111941714	AX-109397030	AX-111041047	AX-110751120	AX-109924723
TaNPF2.4	TraesCS3A02G418700	chr3A:660434466..660446074	AX-108770720	AX-110944828	AX-109311485	AX-111573137	AX-111003978
TaNPF2.4	TraesCS3B02G454000	chr3B:695502091..695515213	AX-110627819	AX-110907448
TaNPF2.4	TraesCS3D02G414300	chr3D:526190020..526210492	AX-94600877
TaNPF2.5	TraesCS3A02G418800	chr3A:660505764..660513584	AX-108745567	AX-108819667	AX-111075642	AX-111557267	AX-109960239
TaNPF2.5	TraesCS3B02G454100	chr3B:695551417..695559650	AX-108745567	AX-109028580	AX-94465541	AX-108772643	AX-111075642	AX-111557267	AX-109960239
TaNPF2.5	TraesCS3D02G414400	chr3D:526271981..526279913	AX-111557267	AX-109960239
TaNPF2.6	TraesCS4A02G283900	chr4A:590653780..590662654	AX-109511394	AX-110110577	AX-94900442	AX-94466879	AX-94437169
TaNPF2.6	TraesCS4B02G029600	chr4B:21926977..21938945	AX-110540306	AX-95173023	AX-94556003	AX-94466879	AX-94471131	AX-108820969	AX-94437169	AX-94393417
TaNPF2.6	TraesCS4D02G026800	chr4D:11860455..11869655	AX-94437169	AX-94393417	AX-94471131	AX-94900442	AX-94466879
TaNPF2.7	TraesCS7A02G111500LC	chr7A:47509366..47515118	AX-110937859	AX-109290709	AX-111078480	AX-111067326	AX-111209396	AX-111739368	AX-110092960
TaNPF2.8	TraesCS7D02G076900	chr7D:45277189..45282139	AX-94431928
TaNPF2.9	TraesCS2B02G057600	chr2B:28091392..28099727	AX-108852802	AX-110472078	AX-109934801	AX-110918573	AX-108741588	AX-110380320	AX-110567530	AX-108825186
TaNPF2.9	TraesCS2D02G044000	chr2D:15931475..15939228	AX-111614560	AX-109281397	AX-111616580	AX-111623423	AX-109871204
TaNPF2.10	TraesCS7B02G020300	chr7B:17840048..17849664	AX-110409944	AX-109427979
TaNPF2.10	TraesCS7D02G119900	chr7D:74444458..74454754	AX-109568672	AX-109021592
TaNPF2.11	TraesCS7A02G121600	chr7A:78450362..78462297	AX-109568672	AX-111005390	AX-111018542	AX-110419405
TaNPF2.11	TraesCS7B02G020200	chr7B:17660362..17668854	AX-109021592	AX-109361944	AX-94966547
TaNPF2.11	TraesCS7D02G119800	chr7D:74415257..74424930	AX-109021592
TaNPF2.12	TraesCS7A02G121700	chr7A:78461536..78471689	AX-111018542	AX-110904744	AX-110419405	AX-110382955	AX-109318895	AX-109311786	AX-111619187	AX-108796078
TaNPF2.12	TraesCS7B02G020500	chr7B:18095198..18105443	AX-109038395	AX-109294669	AX-110942282	AX-108740562
TaNPF2.12	TraesCS7D02G120200	chr7D:74578968..74589793	AX-110382955	AX-94966547	AX-108937274
TaNPF2.13	TraesCS5A02G153200	chr5A:330500071..330508189	AX-108762405	AX-109877787
TaNPF2.13	TraesCS5B02G152000	chr5B:281101166..281109250	AX-111727648	AX-110070346	AX-109369662
TaNPF2.13	TraesCS5D02G158500	chr5D:246651344..246660523	AX-89661757	AX-111727648
TaNPF2.14	TraesCS4A02G440700	chr4A:709714123..709723726	AX-109998935	AX-109816616
TaNPF2.14	TraesCS7A02G054100	chr7A:26237441..26245237	AX-109908601	AX-110613009	AX-110723486
TaNPF2.14	TraesCS7D02G049400	chr7D:25333220..25340777	AX-111114135	AX-109908601
TaNPF2.15	TraesCS4A02G440400	chr7A:26099895..26107734	AX-110066321	AX-110066321	AX-111614486	AX-110609632	AX-111005326	AX-95173678	AX-94901782	AX-94906127	AX-94823791
TaNPF2.15	TraesCS4A02G440500	chr7D:25286139..25293936	AX-108862736	AX-111044580	AX-110913782	AX-110628816	AX-95208021	AX-95173678	AX-111359663	AX-94825361	AX-94823791
TaNPF2.15	TraesCS4A02G440600	chr4A:709269918..709277875	AX-95208021	AX-94464372	AX-95085974	AX-95079762	AX-94595397	AX-95173678	AX-94825361	AX-94823791	AX-94829681	AX-94524110	AX-94484676
TaNPF2.15	TraesCS4A02G654600LC	chr4A:709416290..709424198	AX-110563365	AX-94657223	AX-95208021	AX-94775545	AX-94464372	AX-95085974	AX-95079762	AX-94595397	AX-94825361	AX-94823791	AX-94829681	AX-94524110	AX-94484676
TaNPF2.15	TraesCS7A02G054000	chr4A:709563924..709571822	AX-110563365	AX-94657223	AX-95208021	AX-94775545	AX-94464372	AX-95085974	AX-95079762	AX-94595397	AX-94825361	AX-94823791	AX-94829681	AX-94524110	AX-94484676
TaNPF2.15	TraesCS7D02G049300	chr4A:709610413..709618291	AX-110563365	AX-95208021	AX-95208021	AX-94775545	AX-94464372	AX-95085974	AX-95079762	AX-94595397	AX-94906127	AX-94901782	AX-94823791	AX-94524110	AX-94484676
TaNPF2.16	TraesCS4A02G440300	chr4A:709203800..709211979	AX-109552133	AX-109422740	AX-110064613	AX-109900736
TaNPF3.1	TraesCS7A02G206400	chr7A:169018411..169027550	AX-109865221	AX-111000994	AX-111120097
TaNPF3.1	TraesCS7B02G113600	chr7B:131940140..131949791	AX-94615714	AX-95232170
TaNPF3.1	TraesCS7D02G209200	chr7D:167525344..167533170	AX-110157401
TaNPF3.2	TraesCS1A02G257900	chr1A:449818375..449833326	AX-94405188	AX-94666459	AX-109846338	AX-109847230	AX-110590356
TaNPF3.2	TraesCS1B02G268300	chr1B:471171448..471180201	AX-109308955	AX-94666459	AX-109846338	AX-111038357	AX-110382959	AX-109854890	AX-110064774	AX-110065687
TaNPF3.2	TraesCS1D02G257200	chr1D:349535241..349543730	AX-94405188	AX-94666459	AX-110064774
TaNPF3.3	TraesCS1A02G257800	chr1A:449809772..449816172	AX-111062847
TaNPF3.3	TraesCS1B02G268200	chr1B:471022270..471028692	AX-111693763
TaNPF3.3	TraesCS1D02G257100	chr1D:349475670..349482150	AX-111062847
TaNPF3.4	TraesCS1A02G257400	chr1A:449621117..449628157	AX-94709856	AX-94619289
TaNPF3.4	TraesCS1B02G267900	chr1B:470908728..470915989	AX-111015460	AX-108780727	AX-110915022	AX-110969861	AX-94709856	AX-94619289
TaNPF3.4	TraesCS1D02G256700	chr1D:349250928..349258205	AX-110915022	AX-94709856	AX-94759975	AX-94619289
TaNPF4.1	TraesCS7A02G365100	chr7A:538945627..538955856	AX-109534197	AX-95088598
TaNPF4.1	TraesCS7B02G262200	chr7B:483223827..483235801	AX-111741759	AX-109565820	AX-111208971	AX-110103206	AX-95162789	AX-94984825	AX-94714203	AX-108954903
TaNPF4.1	TraesCS7D02G357300	chr7D:460653550..460665680	AX-111741759	AX-109565820	AX-108798483	AX-111208971	AX-94984825	AX-110103206	AX-95088598
TaNPF4.2	TraesCS2A02G309100	chr2A:532083578..532091723	AX-94541048	AX-94999391	AX-94701273	AX-108728918	AX-94424119	AX-94465870	AX-109553321	AX-109000739	AX-109320654
TaNPF4.2	TraesCS2B02G326200	chr2B:465823606..465831636	AX-94541048	AX-94465870	AX-109553321
TaNPF4.2	TraesCS2D02G307400	chr2D:394116961..394124868	AX-94541048	AX-94465870	AX-109553321
TaNPF4.3	TraesCS2A02G350000	chr2A:589779698..589789831	AX-95209042	AX-108988678	AX-109921988	AX-110610123
TaNPF4.3	TraesCS2D02G348400	chr2D:446304200..446316413	AX-95209042	AX-108988678	AX-109921988	AX-110610123
TaNPF4.3	TraesCS2B02G368400	chr2B:525560802..525569925	AX-108988678
TaNPF4.3	TraesCS2B02G368500	chr2B:525813112..525824783	AX-108947010
TaNPF4.4	TraesCS2A02G264500	chr2A:419463506..419473926	AX-109990832	AX-109489155
TaNPF4.4	TraesCS2B02G277600	chr2B:383361528..383373254	AX-110934662	AX-109454060
TaNPF4.4	TraesCS2D02G259400	chr2D:315486594..315497921	AX-94490940	AX-109454060
TaNPF4.5	TraesCS5A02G388000	chr5A:584860661..584869448	AX-109572185	AX-110514945	AX-94762071	AX-94663496	AX-111799065
TaNPF4.5	TraesCS5B02G393100	chr5B:571523767..571533433	AX-109007740	AX-110643207	AX-109402550	AX-109572185	AX-110514945	AX-109353673	AX-111475184	AX-94663496	AX-110472039	AX-109938751	AX-111489147
TaNPF4.5	TraesCS5D02G398000	chr5D:464413850..464441011	AX-111175690	AX-110514945	AX-110536822	AX-111475184	AX-109773989
TaNPF4.6	TraesCS2A02G350300	chr2A:590634737..590641869	AX-95652894	AX-94929852	AX-94454623
TaNPF4.6	TraesCS2B02G368700	chr2B:526376290..526383340	AX-95652894	AX-109566671
TaNPF4.6	TraesCS2D02G348600	chr2D:446597970..446607379	AX-94489181	AX-95652894	AX-94525503	AX-109557295
TaNPF4.7	TraesCS2A02G350100	chr2A:589786446..589795308	AX-108988678	AX-110610123	AX-109921988	AX-95164723	AX-94914180	AX-95218330	AX-95100292
TaNPF4.7	TraesCS2B02G368600	chr2B:525822745..525830232	AX-95164723	AX-94914180	AX-95018911	AX-95117742	AX-94628801	AX-95218330	AX-95100292
TaNPF4.7	TraesCS2D02G348500	chr2D:446312888..446322496	AX-108988678	AX-110610123	AX-109921988	AX-95164723	AX-94914180	AX-95018911	AX-95179133	AX-94628801	AX-95218330	AX-95100292
TaNPF4.8	TraesCS5A02G056100	chr5A:52339732..52346323	AX-109335461	AX-109375471	AX-110425553	AX-110907679
TaNPF4.8	TraesCS5B02G060500	chr5B:67957409..67964405	AX-110974320	AX-111166435	AX-110092694	AX-109316455	AX-110638674	AX-108932385
TaNPF4.8	TraesCS5D02G067400	chr5D:62296259..62303412	AX-109999681
TaNPF4.8	TraesCS5A02G056200	chr5A:52412513..52420092	AX-110091952	AX-110638674	AX-111200448
TaNPF4.8	TraesCS5B02G060800	chr5B:68184013..68190919	AX-111750333	AX-109883019	AX-110908287
TaNPF4.8	TraesCS5D02G067100	chr5D:62517723..62526059	AX-108879849	AX-110638674	AX-111200448
TaNPF4.9	TraesCS4A02G225400	chr4A:533255983..533264635	AX-109553321	AX-111187725	AX-110509086	AX-94529764	AX-95122547
TaNPF4.9	TraesCS4B02G090800	chr4B:93405869..93414677	AX-110038987	AX-94988757	AX-94891483	AX-94529764	AX-110509086	AX-111187725	AX-109553321
TaNPF4.9	TraesCS4D02G087900	chr4D:63041113..63049741	AX-94988757	AX-94891483	AX-94529764	AX-110509086	AX-109827924	AX-111187725
TaNPF4.10	TraesCS3A02G272600	chr3A:501893576..501899356	AX-111841002	AX-94687645	AX-95161158	AX-94774684	AX-94689996
TaNPF5.1	TraesCS7A02G504300	chr7A:692624752..692630899	AX-111732441	AX-110930275	AX-111547578
TaNPF5.1	TraesCS7D02G491400	chr7D:600834846..600841068	AX-111732441	AX-109471953
TaNPF5.2	TraesCS7A02G461200	chr7A:657371765..657380476	AX-109305917	AX-94487563	AX-109539079
TaNPF5.2	TraesCS7B02G362700	chr7B:624466356..624476640	AX-109539079
TaNPF5.2	TraesCS7D02G449400	chr7D:568617247..568626535	AX-111263005	AX-109539079
TaNPF5.3	TraesCS6A02G041300	chr6A:21632811..21639545	AX-111451736	AX-110109641	AX-109384249	AX-110961316	AX-109934232	AX-109353500	AX-111568276	AX-109851112
TaNPF5.3	TraesCS6B02G056500	chr6B:36805891..36813391	AX-110109641	AX-89379255	AX-109977010
TaNPF5.3	TraesCS6D02G047600	chr6D:22170543..22177397	AX-110064868	AX-109967269	AX-109830644	AX-110316868
TaNPF5.4	TraesCS4B02G338600	chr4B:631568538..631577540	AX-94497400	AX-95105762	AX-110100042	AX-111733155
TaNPF5.4	TraesCS4D02G335100	chr4D:493326185..493339394	AX-94529303	AX-94497400	AX-111732922	AX-109905441	AX-94546094	AX-109309707	AX-110100042	AX-111733155	AX-109865015
TaNPF5.4	TraesCS5A02G508500	chr5A:672833753..672843738	AX-111009947	AX-94529303	AX-94434879	AX-94497400	AX-95105762	AX-111451605	AX-109034219	AX-109405895	AX-110100042
TaNPF5.5	TraesCS1A02G150200	chr1A:257958004..257971311	AX-110516318	AX-109342796	AX-108825194	AX-94651759	AX-108957362
TaNPF5.5	TraesCS1B02G168000	chr1B:297292369..297302980	AX-110500171	AX-109902313	AX-94651759	AX-110102752	AX-108761233
TaNPF5.5	TraesCS1D02G147200	chr1D:203425668..203434604	AX-110500171	AX-110025826	AX-109902313	AX-109342796	AX-94651759	AX-110102752
TaNPF5.6	TraesCS3A02G185600	chr3A:217956846..217965907	AX-110414965
TaNPF5.6	TraesCS3B02G215200	chr3B:256243686..256250395	AX-108787094	AX-111518137	AX-108755866	AX-110406160	AX-108808146	AX-94868543	AX-109844662
TaNPF5.6	TraesCS3D02G189500	chr3D:177339749..177350841	AX-110054007	AX-111622774	AX-109851789
TaNPF5.7	TraesCS1A02G150400	chr1A:258155063..258164400	AX-86163913	AX-94860601	AX-94423107	AX-94962710	AX-94953122	AX-108884378
TaNPF5.7	TraesCS1B02G168100	chr1B:297454239..297462628	AX-110584241	AX-108788370	AX-110060658	AX-110491580	AX-108730590	AX-94962710	AX-94860601	AX-94423107	AX-94953122
TaNPF5.7	TraesCS1D02G147400	chr1D:203467537..203475456	AX-94860601	AX-94962710	AX-94423107	AX-94953122
TaNPF5.8	TraesCS5A02G485000	chr5A:656218573..656224930	AX-111754054
TaNPF5.8	TraesCS5B02G498400	chr5B:665022295..665028600	AX-94687132
TaNPF5.8	TraesCS5D02G498500	chr5D:528292425..528298584	AX-94687132
TaNPF5.9	TraesCS5A02G485200	chr5A:656492054..656498244	AX-109563983
TaNPF5.9	TraesCS5B02G498500	chr5B:665168918..665175359	AX-109944728	AX-111119073	AX-111754599	AX-109002698	AX-109560937	AX-111754054	AX-109014843	AX-109563983	AX-110662434	AX-109027906
TaNPF5.9	TraesCS5D02G498700	chr5D:528413070..528419513	AX-110662434	AX-111754054	AX-109014843
TaNPF5.9	TraesCS5A02G485300	chr5A:656668917..656675325	AX-110662434	AX-111754054
TaNPF5.9	TraesCS5B02G498700	chr5B:665537582..665543850	AX-110662434	AX-111754054	AX-109563983	AX-109014843
TaNPF5.9	TraesCS5D02G498800	chr5D:528585054..528591268	AX-110662434	AX-109563983	AX-109014843
TaNPF5.10	TraesCS7A02G196100	chr7A:155963323..155970273	AX-110423864	AX-110632230	AX-109901325	AX-109019602	AX-108978317
TaNPF5.10	TraesCS7B02G101800	chr7B:116044396..116051311	AX-110632230
TaNPF5.10	TraesCS7D02G197600	chr7D:153982537..153989507	AX-110632230
TaNPF5.11	TraesCS1A02G269400	chr1A:463921731..463930925	AX-111662259
TaNPF5.11	TraesCS1B02G279900	chr1B:488393900..488422426	AX-94541825	AX-111649921	AX-108801883
TaNPF5.11	TraesCS1D02G269500	chr1D:365041093..365053550	AX-111662259
TaNPF5.12	TraesCS1A02G269500	chr1A:463927756..463934776	AX-94641148	AX-110648279	AX-89658578	AX-110939860
TaNPF5.12	TraesCS1B02G280000	chr1B:488461731..488468624	AX-109012761	AX-94422286	AX-94387135	AX-109325063	AX-110571065	AX-108905158
TaNPF5.12	TraesCS1D02G269600	chr1D:365061698..365068427	AX-94641148
TaNPF5.13	TraesCS7B02G040100	chr7B:40273427..40279728	AX-110511355
TaNPF5.13	TraesCS7D02G139600	chr7D:89308755..89315048	AX-109740947
TaNPF5.14	TraesCS2B02G248000	chr2B:254624140..254630118	AX-109567254	AX-110657200	AX-109454686	AX-111162158	AX-110483985
TaNPF5.14	TraesCS3B02G304500	chr3B:489347602..489353562	AX-108914532	AX-110657200	AX-109454686	AX-109567254
TaNPF5.14	TraesCS4B02G057000	chr4B:46930904..46936277	AX-110657200	AX-109567254	AX-109454686
TaNPF5.15	TraesCS3A02G382100	chr3A:632036987..632043525	AX-110411589
TaNPF5.15	TraesCS3B02G414800	chr3B:651423224..651430093	AX-109454686
TaNPF5.15	TraesCS3D02G375900	chr3D:488947722..488954613	AX-95116781
TaNPF5.16	TraesCS3A02G382200	chr3A:632285877..632292161	AX-109571249
TaNPF5.16	TraesCS3B02G414900	chr3B:651498715..651504890	AX-111780201	AX-109571249	AX-109559162	AX-111449410
TaNPF5.16	TraesCS3D02G375800	chr3D:488900431..488907014	AX-94636043	AX-111490323
TaNPF5.17	TraesCS1A02G269600	chr1A:463956197..463965550	AX-94478919	AX-108785162
TaNPF5.17	TraesCS1B02G280100	chr1B:488471586..488484853	AX-94517111	AX-111820232	AX-111013592	AX-111021961	AX-110445972	AX-111776753
TaNPF5.17	TraesCS1D02G269700	chr1D:365079860..365088965	AX-109869831	AX-111021961
TaNPF5.18	TraesCS3A02G382700	chr3A:632377572..632389729	AX-94547377
TaNPF5.18	TraesCS3D02G375400	chr3D:488862071..488870344	AX-94547377	AX-110043298
TaNPF5.19	TraesCS3A02G382800	chr3A:632393121..632422295	AX-111723019
TaNPF5.19	TraesCS3D02G375300	chr3D:488579066..488586307	AX-110621406	AX-94400213	AX-94850831	AX-94699057
TaNPF5.20	TraesCS3A02G382900	chr3A:632422959..632429037	AX-108915135
TaNPF5.20	TraesCS3D02G375200	chr3D:488571342..488577462	AX-110621406	AX-94400213	AX-94850831	AX-94699057
TaNPF5.21	TraesCS3B02G415700	chr3B:652289889..652296086	AX-94544448	AX-94873439	AX-94469999
TaNPF5.21	TraesCS3D02G376300	chr3D:489643152..489648680	AX-94873439
TaNPF5.22	TraesCS3A02G383200	chr3A:632728780..632735249	AX-111094313
TaNPF5.22	TraesCS3B02G415600	chr3B:652285564..652292701	AX-109833895
TaNPF5.22	TraesCS3D02G376200	chr3D:489616298..489622394	AX-111599896	AX-94712705
TaNPF5.23	TraesCS3A02G382300	chr3A:632290910..632297469	AX-109571249
TaNPF5.23	TraesCS3D02G375700	chr3D:488891712..488898141	AX-94636043	AX-111490323
TaNPF5.23	TraesCS3B02G415000	chr3B:651503791..651510268	AX-109571249	AX-109559162	AX-111449410
TaNPF5.23	TraesCS3B02G415200	chr3B:651564155..651569486	AX-94911713	AX-95209415	AX-94464941
TaNPF5.24	TraesCS3A02G382600	chr3A:632367349..632376100	AX-108965271
TaNPF5.24	TraesCS3D02G375500	chr3D:488870559..488877577	AX-94821665	AX-94938759	AX-111275624
TaNPF5.25	TraesCS3B02G415100	chr3B:651506456..651536768	AX-109571249	AX-109559162	AX-111449410
TaNPF5.26	TraesCS3A02G382400	chr3A:632293571..632299923	AX-109571249
TaNPF5.26	TraesCS3B02G415300	chr3B:651565677..651572233	AX-94911713	AX-95209415	AX-94464941
TaNPF5.26	TraesCS3D02G375600	chr3D:488886267..488893488	AX-94636043
TaNPF5.27	TraesCS2A02G572100	chr2A:768550785..768560129	AX-108923489	AX-111630261	AX-110622135	AX-110415010	AX-110385277	AX-111063941	AX-110379929	AX-108924386	AX-110606094	AX-110479955	AX-108738698	AX-108967080	AX-108739725
TaNPF5.28	TraesCS2B02G626100	chr2B:798588036..798593841	AX-108788130	AX-109323358
TaNPF5.28	TraesCS2B02G626600	chr2B:798728087..798735009	AX-109323358	AX-108788130
TaNPF5.29	TraesCS2A02G565600	chr2A:765050585..765058685	AX-95003018	AX-94839118	AX-94435533	AX-95172298	AX-94632241
TaNPF5.29	TraesCS2D02G576000	chr2D:639675529..639682559	AX-108917590	AX-108823803	AX-94883568	AX-95003018	AX-94839118	AX-111455879
TaNPF5.29	TraesCS2B02G626000	chr2B:798576291..798585449	AX-94839118	AX-95003018	AX-94426847
TaNPF5.29	TraesCS2B02G626700	chr2B:798740785..798748188	AX-94883568	AX-95003018	AX-110523164
TaNPF5.30	TraesCS2A02G572300	chr2A:768607019..768622741	AX-111572523	AX-109001987	AX-110504864	AX-111184436	AX-109947263
TaNPF5.30	TraesCS2B02G615200	chr2B:793351001..793370025	AX-108949398	AX-110409894	AX-109947263	AX-111193289	AX-109904116	AX-108733514	AX-109918356	AX-109388651	AX-109309405	AX-109392512	AX-110532937	AX-111566415	AX-110670769	AX-109277742	AX-110445867	AX-111720475	AX-109876690	AX-110517126
TaNPF5.30	TraesCS2D02G583600	chr2D:643759743..643771903	AX-109493535	AX-111011977	AX-111485812	AX-110532937	AX-111193289	AX-94857297	AX-109947263
TaNPF5.31	TraesCS2A02G572200	chr2A:768569253..768577767	AX-111530079	AX-110392230	AX-110074542	AX-111565202	AX-109485768	AX-110479955	AX-110442663	AX-94750776	AX-94976363	AX-94828715	AX-94857297
TaNPF5.31	TraesCS2B02G615300	chr2B:793373123..793382389	AX-109983353	AX-94857297	AX-94828715	AX-94976363	AX-111483318	AX-94750776	AX-110442663	AX-110479955	AX-111093893	AX-110960803	AX-110948342	AX-109546114	AX-110097567
TaNPF5.31	TraesCS2D02G583500	chr2D:643735493..643747576	AX-109485768	AX-94921635	AX-110479955	AX-94857297	AX-110442663	AX-94976363	AX-94828715
TaNPF5.32	TraesCS2A02G571800	chr2A:768464047..768471553	AX-111659190	AX-110934832	AX-109849241	AX-111685874	AX-109537990	AX-111015507	AX-110662357	AX-111128905	AX-110365568	AX-110082433
TaNPF5.32	TraesCS2D02G583300	chr2D:643658053..643662679	AX-110934832	AX-111685874	AX-111015507
TaNPF5.33	TraesCS2A02G572000	chr2A:768539320..768548773	AX-111515262	AX-111726253	AX-109339820	AX-109285540	AX-109518792	AX-109961104	AX-108813612	AX-109897450	AX-109009324	AX-111183516	AX-110115955	AX-109011540	AX-111461490	AX-108962439	AX-108985506	AX-111466778	AX-94782847	AX-94694991	AX-109317156	AX-95222297	AX-94415912	AX-109858620
TaNPF5.33	TraesCS2B02G615400	chr2B:793404864..793415063	AX-111552761	AX-95222297	AX-109317156	AX-111181700	AX-110620676
TaNPF5.34	TraesCS2A02G571900	chr2A:768515639..768531222	AX-109927123	AX-110071269	AX-110372451	AX-110466629	AX-108726598	AX-110476509	AX-109432576	AX-111477871	AX-110069002	AX-109563795	AX-94457040	AX-94431257	AX-94991110	AX-94782847	AX-95225571
TaNPF5.34	TraesCS2B02G615500	chr2B:793411274..793429215	AX-110620676	AX-94991110	AX-94849794	AX-94596874	AX-95217649	AX-94586783	AX-110069002
TaNPF5.34	TraesCS2D02G583400	chr2D:643672583..643690560	AX-111133987	AX-108981520	AX-110088431	AX-110069002	AX-94586783	AX-95217649	AX-94596874	AX-94849794	AX-95225571
TaNPF6.1	TraesCS7A02G301700	chr7A:420835199..420845579	AX-95074645	AX-94556475	AX-110408871	AX-95073992	AX-111457204	AX-94589388	AX-94519535
TaNPF6.1	TraesCS7B02G201900	chr7B:369408910..369419347	AX-95074645	AX-94556475	AX-95073992	AX-94861173	AX-111749613	AX-94589388	AX-94519535
TaNPF6.1	TraesCS7D02G297000	chr7D:374562870..374574229	AX-95074645	AX-95073992	AX-94618851	AX-94861173	AX-111749613	AX-94519535
TaNPF6.2	TraesCS1A02G210900	chr1A:373764258..373770702	AX-110919528	AX-111537094	AX-109523992	AX-111608555	AX-108905413	AX-111468908	AX-110370280	AX-94527794	AX-108892137	AX-111704028
TaNPF6.2	TraesCS1B02G224900	chr1B:403539134..403546017	AX-109527094	AX-109357472	AX-110403389	AX-109018733	AX-94860121
TaNPF6.2	TraesCS1D02G214200	chr1D:299573952..299580670	AX-94527794	AX-94860121
TaNPF6.3	TraesCS1A02G211000	chr1A:373768846..373776884	AX-108892137	AX-111704028	AX-109018733	AX-94676516	AX-111186538	AX-109397850	AX-110605215	AX-111702990	AX-94690146	AX-111726083	AX-110656201	AX-110459953
TaNPF6.3	TraesCS1B02G225000	chr1B:403575989..403584333	AX-94860121	AX-110963026	AX-109329854	AX-94690146	AX-111066706
TaNPF6.3	TraesCS1D02G214300	chr1D:299579436..299587274	AX-94860121	AX-109018733	AX-94676516
TaNPF6.4	TraesCS4D02G361500	chr4D:508262326..508273976	AX-94650225	AX-108983783	AX-95103151	AX-94699211	AX-94952625	AX-110984199	AX-109027667
TaNPF6.4	TraesCS5A02G537100	chr5A:693630703..693644408	AX-94650225	AX-94699211	AX-109291657	AX-94413558	AX-110649530	AX-109548004
TaNPF6.4	TraesCS4B02G371000	chr4B:656819274..656830454	AX-110934357	AX-110441611	AX-108846726	AX-110981188	AX-111642744	AX-109548004	AX-109987295	AX-110426411	AX-111187624	AX-109840991	AX-111643323	AX-109027667	AX-110984199	AX-94699211	AX-95103151	AX-108983783	AX-108753081
TaNPF6.4	TraesCS4B02G375800	chr4B:659566934..659585635	AX-110981188	AX-111647858	AX-111215227	AX-111552995	AX-111833826	AX-109027667	AX-110984199
TaNPF6.5	TraesCS1A02G031300	chr1A:14517757..14527659	AX-111553431	AX-111462002	AX-108733157	AX-110923459	AX-94679893	AX-94746482	AX-109025915	AX-94927027	AX-94411045	AX-94864865	AX-94866998	AX-94995515	AX-94884887	AX-94718736	AX-111132858	AX-110604995	AX-109005071	AX-94512054
TaNPF6.5	TraesCS1B02G038700	chr1B:18383559..18389800	AX-109005071	AX-94787863	AX-94765426	AX-94718736	AX-94628412	AX-94865593	AX-94884887	AX-94847672	AX-94746482	AX-94679893	AX-95092495
TaNPF6.5	TraesCS1D02G032700	chr1D:13038668..13045201	AX-94679893	AX-94847672	AX-94579701	AX-94927027	AX-94411045	AX-94995515	AX-94964707	AX-94787863
TaNPF6.6	TraesCS5A02G409600	chr5A:599202895..599210619	AX-109853206	AX-95208663	AX-95070769	AX-111201296	AX-94811902	AX-94990950	AX-108799536
TaNPF6.6	TraesCS5B02G414000	chr5B:588643040..588651060	AX-111653355	AX-111201296	AX-94811902	AX-110109193	AX-110644986	AX-89508416	AX-110477334	AX-108961840	AX-111658654	AX-111208993	AX-110639929
TaNPF6.6	TraesCS5D02G419200	chr5D:480460012..480468049	AX-95208663	AX-110109193
TaNPF6.7	TraesCS2A02G335800	chr2A:569899951..569908394	AX-111468894	AX-111166212	AX-110623474	AX-110096020
TaNPF6.7	TraesCS2B02G346100	chr2B:492790894..492798705	AX-110083141	AX-110084652	AX-109375931	AX-110623474	AX-109568463
TaNPF6.7	TraesCS2D02G327000	chr2D:420307371..420314903	AX-109810798	AX-110042692
TaNPF6.8	TraesCS3A02G081100	chr3A:52455399..52461601	AX-109986211	AX-94724685	AX-94461074
TaNPF6.8	TraesCS3B02G095900	chr3B:64312648..64318600	AX-94724685	AX-94514196	AX-94461074	AX-94473557	AX-111489134	AX-111647251	AX-94870014	AX-94955519	AX-109883466	AX-94630173	AX-94579711	AX-95195301	AX-109994680
TaNPF6.8	TraesCS3D02G081100	chr3D:40750823..40756787	AX-111489134	AX-94514196	AX-94473557	AX-94724685	AX-94461074
TaNPF7.1	TraesCS6A02G263500	chr6A:486545388..486552355	AX-110087816	AX-110624354
TaNPF7.1	TraesCS6B02G290500	chr6B:522637943..522645410	AX-110537840	AX-110430673	AX-108739352	AX-109557730	AX-111007003	AX-108808298	AX-110624354	AX-111193094	AX-109992711
TaNPF7.1	TraesCS6D02G251500	chr6D:355134376..355141848	AX-109994388	AX-109994388	AX-94697440	AX-94870885	AX-94691804	AX-110624354	AX-110971169	AX-109388403	AX-110964132	AX-110087816
TaNPF7.2	TraesCS6A02G280200	chr6A:508711671..508719055	AX-110635536	AX-109570893	AX-110662708
TaNPF7.2	TraesCS6B02G309200	chr6B:553410949..553418311	AX-110014714	AX-110662708	AX-109570893	AX-110635536
TaNPF7.2	TraesCS6D02G260500	chr6D:368107389..368114589	AX-110635536	AX-110662708	AX-109570893
TaNPF7.3	TraesCS6A02G056500	chr6A:29781665..29789010	AX-109826956	AX-110563387	AX-108798578	AX-109325152	AX-111493411	AX-94404055	AX-111723499	AX-109834801	AX-94474138	AX-111552220
TaNPF7.3	TraesCS6B02G076100	chr6B:52080518..52090300	AX-108910149	AX-94404055
TaNPF7.3	TraesCS6D02G060200	chr6D:28241049..28248438	AX-94404055
TaNPF7.4	TraesCS2A02G443600	chr2A:693425744..693432046	AX-109640733	AX-111525196	AX-109942038	AX-111509082	AX-94645166	AX-111711349	AX-109503151	AX-108892381
TaNPF7.4	TraesCS2B02G464700	chr2B:658999604..659005923	AX-109866834	AX-95233634	AX-110916355	AX-109313634	AX-109406595	AX-109336133
TaNPF7.4	TraesCS2D02G442700	chr2D:553249322..553255682	AX-94645166	AX-109336133
TaNPF7.5	TraesCS2A02G443700	chr2A:693441294..693447920	AX-108899307	AX-108793455
TaNPF7.5	TraesCS2B02G464900	chr2B:659081257..659087942	AX-94684313	AX-110941234	AX-109518784	AX-110093778
TaNPF7.5	TraesCS2D02G442900	chr2D:553383993..553390423	AX-94684313	AX-110941234
TaNPF7.6	TraesCS1A02G197600	chr1A:355622056..355630073	AX-109371949	AX-94480137	AX-108966286	AX-111715806	AX-109236198
TaNPF7.6	TraesCS1D02G201100	chr1D:284038636..284046349	AX-94480137	AX-108966286
TaNPF7.6	TraesCS1B02G212300	chr1B:385642930..385650470	AX-108782286	AX-110618654	AX-110974555	AX-111656346	AX-94480137	AX-108966286	AX-95659691	AX-95144818
TaNPF7.6	TraesCS1B02G212200	chr1B:385652520..385657827	AX-109855842	AX-109414338
TaNPF7.7	TraesCS1A02G197700	chr1A:355627145..355633608	AX-111715806	AX-109236198	AX-95086777	AX-94753193	AX-94449995	AX-111174522
TaNPF7.7	TraesCS1B02G212400	chr1B:385654513..385661409	AX-109855842	AX-109414338	AX-95254691	AX-95086777	AX-94988329	AX-94449995	AX-94927405
TaNPF7.7	TraesCS1D02G201200	chr1D:284044217..284050575	AX-109236198	AX-95086777	AX-94449995	AX-94825486
TaNPF7.8	TraesCS2A02G175600	chr2A:133981836..133989359	AX-111493860	AX-108801272	AX-94781086	AX-94551121	AX-95658458	AX-94645948	AX-94645231	AX-94520948	AX-94466269	AX-109525805	AX-110400550	AX-110506933
TaNPF7.8	TraesCS2D02G182900	chr2D:127111821..127119419	AX-108801272	AX-94781086	AX-94551121	AX-94645948	AX-94645231	AX-94520948	AX-94466269	AX-110646264
TaNPF7.9	TraesCS6A02G267600	chr6A:493753725..493759925	AX-94924378	AX-95087259	AX-95164974	AX-94645166	AX-111207319	AX-109005268
TaNPF7.9	TraesCS6B02G295000	chr6B:529771302..529777845	AX-110604919	AX-109428625	AX-109818152	AX-94924378	AX-94948537	AX-95087259	AX-94645166	AX-111207689	AX-109005268
TaNPF7.9	TraesCS6D02G246400	chr6D:348858611..348865201	AX-94948537	AX-95087259	AX-95164974	AX-94645166	AX-111207319	AX-111207689	AX-109005268	AX-111276621
TaNPF7.9	TraesCS6A02G267700	chr6A:493840285..493846108	AX-94924378	AX-94948537	AX-95164974	AX-94645166	AX-111207689	AX-109005268
TaNPF7.9	TraesCS6B02G295100	chr6B:529887409..529893715	AX-94924378	AX-94948537	AX-95164974	AX-94645166	AX-111207689	AX-109005268	AX-111690288	AX-111589259
TaNPF7.9	TraesCS6D02G246500	chr6D:349028668..349035236	AX-110619121	AX-94948537	AX-95087259	AX-95164974	AX-94645166	AX-111207319	AX-111207689	AX-109005268
TaNPF7.9	TraesCS6A02G267800	chr6A:494044601..494050819	AX-111589491	AX-110537457	AX-111186582	AX-94948537	AX-111207319	AX-111207689	AX-109005268
TaNPF7.9	TraesCS6B02G295600	chr6B:530848382..530854917	AX-111629494	AX-111207689	AX-109005268	AX-94645166	AX-94948537	AX-94924378	AX-109522829	AX-111076111	AX-111729409	AX-111161686	AX-111525040
TaNPF7.9	TraesCS6D02G247000	chr6D:350060981..350086251	AX-109005268	AX-111207689	AX-111273628	AX-110023402	AX-111603714	AX-111558977	AX-109185530	AX-110279980	AX-110126100	AX-94948537
TaNPF7.9	TraesCS6A02G268400	chr6A:494877306..494883204	AX-109005268	AX-111207689	AX-111207319	AX-94645166	AX-94924378	AX-111717968
TaNPF7.9	TraesCS6D02G247100	chr6D:350201215..350207761	AX-109005268	AX-111207689	AX-111207319	AX-94645166	AX-95164974	AX-94948537	AX-94924378
TaNPF7.9	TraesCS6A02G268500	chr6A:495150188..495156832	AX-109005268	AX-111207689	AX-111207319	AX-94645166	AX-95164974	AX-94948537	AX-94924378	AX-111717968
TaNPF7.10	TraesCS5A02G546200	chr4B:660594274..660601227	AX-94542483	AX-110433285	AX-111203341	AX-111733430	AX-109415178	AX-110043997	AX-94968607	AX-95245297	AX-109475561	AX-109445838	AX-111599164	AX-111185781
TaNPF7.10	TraesCS4B02G380000	chr5A:700450461..700457186	AX-111560225	AX-109525617	AX-111738478	AX-110030226	AX-110113509	AX-111599164
TaNPF7.10	TraesCSU02G130200	chrUn:110525927..110532951	AX-94542483	AX-94510738	AX-95096536	AX-111203341	AX-110043997	AX-94968607	AX-95220901	AX-94606210	AX-95245297	AX-111738478
TaNPF8.1	TraesCS3B02G069900	chr3B:41798392..41804109	AX-109478218	AX-109344702
TaNPF8.1	TraesCS3D02G057000	chr3D:23855642..23861519	AX-108905993
TaNPF8.2	TraesCS2A02G416800	chr2A:672942927..672948761	AX-110653549
TaNPF8.2	TraesCS2D02G413900	chr2D:528096369..528102205	AX-110653549	AX-108767381
TaNPF8.3	TraesCS3A02G057000	chr3A:32872669..32878838	AX-111143218	AX-111739748	AX-111461782	AX-108869696	AX-110593698
TaNPF8.3	TraesCS3B02G070200	chr3B:42122849..42129351	AX-110400076	AX-110738054
TaNPF8.3	TraesCS3D02G056700	chr3D:23727222..23733531	AX-111143218	AX-111461782
TaNPF8.4	TraesCS3A02G056400	chr3A:32423722..32430453	AX-111547056	AX-108761924
TaNPF8.4	TraesCS3B02G069100	chr3B:41012129..41017973	AX-109006702	AX-109020391
TaNPF8.4	TraesCS3D02G056300	chr3D:23227137..23232993	AX-94394906	AX-110055596
TaNPF8.5	TraesCS5A02G656200LC	chr4B:672125798..672131927	AX-110008063	AX-109027071
TaNPF8.5	TraesCS4B02G398100	chr5A:658987735..658992871	AX-109027071	AX-109289067	AX-108999478
TaNPF8.5	TraesCSU02G115500	chrUn:100087490..100093532	AX-109027071	AX-109289067	AX-108999478
TaNPF8.6	TraesCS3A02G392800	chr3A:640622957..640634464	AX-94712705
TaNPF8.6	TraesCS3B02G424700	chr3B:662548416..662559300	AX-110555792	AX-110399549	AX-108949068	AX-94400226	AX-95193990	AX-111736256	AX-110078126	AX-109921180
TaNPF8.6	TraesCS3D02G385600	chr3D:501075349..501089247	AX-110978259
TaNPF8.6	TraesCS3A02G392900	chr3A:640677084..640704807	AX-94400226	AX-95193990	AX-110085218	AX-94606351
TaNPF8.6	TraesCS3B02G424800	chr3B:662793946..662801029	AX-111174853	AX-110064249	AX-111462640	AX-110644050	AX-109552645	AX-110051686	AX-110930739	AX-110936136	AX-109488811	AX-109933543	AX-110364202	AX-108944750
TaNPF8.6	TraesCS3D02G385700	chr3D:501160157..501166881	AX-110603546	AX-111673183	AX-110436034
TaNPF8.6	TraesCS3A02G533500LC	chr3A:640746868..640754052	AX-94400226
TaNPF8.7	TraesCS7A02G095200	chr7A:58206435..58215344	AX-111773457	AX-110007796	AX-111187702
TaNPF8.7	TraesCS7D02G091600	chr7D:54920050..54929058	AX-108856165
TaNPF8.8	TraesCS5B02G245300	chr5B:426556282..426568220	AX-109528272
TaNPF8.9	TraesCS4A02G262700	chr4A:575004132..575012273	AX-95148993	AX-95079400	AX-94411582	AX-94690939	AX-110618943	AX-95138725	AX-94758948	AX-94898198	AX-94924773	AX-86184125	AX-94470058
TaNPF8.9	TraesCS4B02G052200	chr4B:40865128..40872417	AX-94924773	AX-94690939	AX-95138725	AX-94411582
TaNPF8.9	TraesCS4D02G052400	chr4D:28479269..28487238	AX-109015520	AX-94629171	AX-94470058	AX-94924773	AX-110618943	AX-94690939	AX-94411582	AX-95079400	AX-95148993	AX-111637902
TaNPF8.10	TraesCS4A02G076100	chr4A:75416582..75424486	AX-111735659	AX-111497731	AX-108828249	AX-111560140	AX-109817454	AX-109514978	AX-110523477	AX-111547930	AX-94672471	AX-95134638	AX-111707180	AX-108993484
TaNPF8.10	TraesCS4B02G232000	chr4B:483749248..483757172	AX-94682359	AX-111007900	AX-110970259	AX-111172138	AX-110981690	AX-94672471
TaNPF8.10	TraesCS4D02G233300	chr4D:394133369..394141124	AX-95192001	AX-94849610	AX-94683511
TaNPF8.11	TraesCS4A02G076200	chr4A:75421082..75428652	AX-94672471	AX-95134638	AX-111707180	AX-108993484	AX-110545620	AX-109934701	AX-110367515	AX-94849610
TaNPF8.11	TraesCS4B02G232100	chr4B:483757462..483765425	AX-109873788	AX-110589591
TaNPF8.11	TraesCS4D02G233400	chr4D:394138931..394149033	AX-95192001	AX-94849610	AX-94683511
TaNPF8.12	TraesCS4A02G075900	chr4A:75339600..75349922	AX-110442877	AX-109411376	AX-108732542	AX-110952313	AX-111076800	AX-110365060	AX-94533454	AX-95120450	AX-108845825	AX-108867172	AX-110653566	AX-111822312
TaNPF8.12	TraesCS4B02G231700	chr4B:483576024..483586267	AX-94533454	AX-94928570	AX-94628146	AX-95237062	AX-95120450	AX-94459652	AX-94714479	AX-109277492	AX-110533351	AX-111574878	AX-108838872	AX-111591449	AX-111455938
TaNPF8.12	TraesCS4D02G233000	chr4D:393843875..393854232	AX-111533335	AX-111478031	AX-94533454	AX-94459652	AX-95237062	AX-95120450	AX-109277492
TaNPF8.13	TraesCS7A02G531000	chr7A:709806961..709815387	AX-108769995	AX-109341723	AX-110951611	AX-110432405	AX-111513828	AX-95014306	AX-108905198	AX-109844420	AX-111179357	AX-111715714	AX-110045885	AX-109484477
TaNPF8.13	TraesCS7D02G518900	chr7D:617076997..617084760	AX-110636845	AX-109396615	AX-111513828	AX-95014306	AX-86163181	AX-108905198
TaNPF8.14	TraesCS4A02G075700	chr4A:75245096..75260614	AX-108930857	AX-111673792	AX-111027111	AX-109593661	AX-111567771	AX-109048173	AX-111019541	AX-95012157	AX-94794538	AX-111513828
TaNPF8.14	TraesCS4B02G231500	chr4B:483506916..483516108	AX-111132306	AX-94794538	AX-111513828
TaNPF8.14	TraesCS4D02G232900	chr4D:393706690..393723461	AX-94794538	AX-95012157	AX-109120215
TaNPF8.15	TraesCS4A02G076000	chr4A:75354152..75361291	AX-110958071	AX-111564154	AX-109523184	AX-109350540	AX-109923002	AX-111741798	AX-111191683	AX-109011389	AX-110458781	AX-111670393
TaNPF8.15	TraesCS4B02G231800	chr4B:483695193..483702020	AX-109958516
TaNPF8.15	TraesCS4D02G233100	chr4D:394105848..394112668	AX-108824322	AX-109930385
TaNPF8.16	TraesCS2A02G007500	chr2A:3331157..3338110	AX-109946950	AX-111751909	AX-94622587	AX-94984700	AX-94578849	AX-94897939	AX-95227146	AX-94788628	AX-94872659	AX-94781313	AX-94828303	AX-94950448	AX-94702685	AX-94899249	AX-111463537
TaNPF8.16	TraesCS2D02G009200	chr2D:5095757..5102568	AX-111523632
TaNPF8.17	TraesCS2B02G013000	chr2B:6334691..6343938	AX-110638744	AX-111475232	AX-95216700	AX-86175546	AX-111721295	AX-109901641	AX-110915466	AX-109517197	AX-110437923
TaNPF8.18	TraesCS2A02G007100	chr2A:3097245..3103998	AX-109445440	AX-108810873	AX-108934515	AX-94557273	AX-110918054	AX-86173660	AX-110483154	AX-110594942	AX-109301872	AX-109296932
TaNPF8.18	TraesCSU02G307300LC	chr2D:5084662..5091638	AX-94815994	AX-95019552	AX-94745836	AX-94557273	AX-94946356	AX-94945502
TaNPF8.18	TraesCS2D02G009100	chrUn:249547797..249554112	AX-109445440	AX-94557273	AX-110483154	AX-108810873	AX-108934515	AX-108917107	AX-110918054	AX-86173660
TaNPF8.19	TraesCS6A02G369900	chr6A:595056853..595063606	AX-110368218	AX-109005637	AX-108892232	AX-108861126	AX-111064166	AX-111107145	AX-109819273	AX-94713600	AX-109558850	AX-89571577	AX-110637394	AX-110653899	AX-108823687	AX-111739834	AX-111660589
TaNPF8.19	TraesCS6B02G406100	chr6B:680793674..680800587	AX-111199203	AX-95164366	AX-94977626	AX-89575840	AX-110653899	AX-111529567	AX-111660589
TaNPF8.19	TraesCS6D02G353500	chr6D:449224044..449231051	AX-110966337	AX-111199203	AX-94977626	AX-111529567	AX-111660589
TaNPF8.20	TraesCS7A02G381800	chr7A:556477058..556483205	AX-111750874	AX-109285585	AX-109481885
TaNPF8.20	TraesCS7B02G284300	chr7B:518336133..518342295	AX-108990605	AX-111029090	AX-111468310	AX-109956281	AX-109849430
TaNPF8.20	TraesCS7D02G378300	chr7D:489671028..489677409	AX-111750874	AX-111199203
TaNPF8.21	TraesCS7A02G381600	chr7A:556322946..556333710	AX-94969579	AX-110834861
TaNPF8.22	TraesCS7A02G381700	chr7A:556353256..556360298	AX-109401043	AX-111651433	AX-109376699
TaNPF8.22	TraesCS7B02G283800	chr7B:517918308..517925307	AX-95080315	AX-95175048	AX-94969579	AX-110439344
TaNPF8.22	TraesCS7D02G377900	chr7D:489156860..489162825	AX-110584880	AX-95080315	AX-94969579	AX-95175048	AX-109533617
TaNPF8.23	TraesCS7A02G381500	chr7A:556316338..556322821	AX-111713919
TaNPF8.23	TraesCS7B02G283400	chr7B:517621485..517627982	AX-110592903	AX-111528677	AX-94550737	AX-111062502
TaNPF8.23	TraesCS7D02G377800	chr7D:489151269..489157840	AX-111062502	AX-110584880
TaNPF8.24	TraesCS4B02G026700	chr4B:20276828..20282986	AX-111695911	AX-110448610
TaNPF8.24	TraesCS4D02G024400	chr4D:10762927..10769938	AX-109572148	AX-111206359	AX-111201302
TaNPF8.24	TraesCS4A02G287300	chr4A:592542381..592549078	AX-109541806	AX-94431675
TaNPF8.24	TraesCS4A02G287900	chr4A:593111134..593118295	AX-109541806	AX-94431675
TaNPF8.25	TraesCS6A02G142600	chr6A:117410062..117416804	AX-109001594
TaNPF8.25	TraesCS6B02G171000	chr6B:183330122..183336715	AX-108886061
TaNPF8.25	TraesCS6D02G132100	chr6D:98125697..98132114	AX-111142977
TaNPF8.26	TraesCS7A02G413100	chr7A:603941547..603948065	AX-94692475	AX-109544895	AX-109544520
TaNPF8.26	TraesCS7B02G312600	chr7B:558361420..558367956	AX-109940929	AX-109837171	AX-110490933
TaNPF8.26	TraesCS7D02G406200	chr7D:523273572..523280091	AX-109544895	AX-109544520
TaNPF8.27	TraesCS7B02G312700	chr7B:558637959..558645064	AX-109377100	AX-94433026	AX-110482830	AX-109617089
TaNPF8.27	TraesCS7D02G406400	chr7D:523434256..523441778	AX-110071841	AX-111719156	AX-111163201	AX-109424272
TaNPF8.27	TraesCS7A02G413300	chr7A:603957504..603963150	AX-111163201
TaNPF8.27	TraesCS7A02G413200	chr7A:603954280..603961434	AX-111500817	AX-111798314	AX-111163201
TaNPF8.28	TraesCS7B02G312500	chr7B:558320872..558328014	AX-110475221	AX-108879690
TaNPF8.28	TraesCS7D02G406100	chr7D:523266112..523273588	AX-95202117	AX-94565264	AX-94699865	AX-110475221	AX-108879690	AX-111598182	AX-111617345
TaNPF8.29	TraesCS7A02G412100	chr7A:603021754..603028488	AX-109524342	AX-110479361	AX-109273554	AX-110112311	AX-111709942	AX-109550783	AX-94692475
TaNPF8.29	TraesCS7B02G311400	chr7B:556684657..556691262	AX-111022314	AX-109550783
TaNPF8.29	TraesCS7D02G405300	chr7D:522869947..522876464	AX-111022314	AX-109445865	AX-109955048	AX-111706005	AX-94692475
