# Supplementary material
Source: Research Square preprint supplement (doi:10.21203/rs.3.rs-9009137/v1)
Supplement: Supplementary file 2 [file 278ca772b81bdd44b32f3ed0.xlsx]

## Sheet: Supplementary Data 10
Supplementary Data 10. Origins and genotypes of TaNPF7.6-A1 in Chinese wheat accessions.
TaNPF7.6-A1 allele	Accession name	Group in this study	Breeding sites	Origin	Agroecological region
lan	Shannongfu 63	Modern cultivar	pre-1980	China (Shandong)	Ⅱ
lan	Fan 6	Modern cultivar	pre-1980	China (Sichuan)	Ⅳ
lan	Bima 1	Modern cultivar	pre-1980	China (Shaanxi)	Ⅰ
lan	Biyu Wheat	Modern cultivar	pre-1980	China (Shaanxi)	Ⅰ
lan	Jinan 2	Modern cultivar	pre-1980	China (Shandong)	Ⅱ
lan	Xinong 6028	Modern cultivar	pre-1980	China (Shaanxi)	Ⅰ
lan	Shijiazhuang 54	Modern cultivar	pre-1980	China (Hebei)	Ⅰ
mod	Fengchan 3	Modern cultivar	pre-1980	China (Shaanxi)	Ⅰ
mod	Anhui 3	Modern cultivar	pre-1980	China (Anhui)	Ⅱ
lan	Mianyang 20	Modern cultivar	1981-1990	China (Sichuan)	Ⅳ
lan	Yunmai 34	Modern cultivar	1981-1990	China (Yunnan)	Ⅳ
lan	Jimai 22	Modern cultivar	1981-1990	China (Shanxi)	Ⅱ
mod	Baofeng 7228	Modern cultivar	1981-1990	China (Henan)	Ⅱ
mod	Ningchun 13	Modern cultivar	1981-1990	China (Ningxia)	Ⅷ
mod	Jinmai 31	Modern cultivar	1981-1990	China (Shanxi)	Ⅱ
mod	Yumai 7	Modern cultivar	1981-1990	China (Henan)	Ⅱ
lan	Luozhen 1	Modern cultivar	1991-2000	China (Hebei)	Ⅰ
lan	Yumai 13	Modern cultivar	1991-2000	China (Henan)	Ⅱ
lan	Jinan 16	Modern cultivar	1991-2000	China (Shandong)	Ⅱ
lan	Lumai 15	Modern cultivar	1991-2000	China (Shandong)	Ⅱ
lan	Jimai 38	Modern cultivar	1991-2000	China (Hebei)	Ⅰ
lan	Jinmai 61	Modern cultivar	1991-2000	China (Shanxi)	Ⅱ
lan	Xingzi 9104	Modern cultivar	1991-2000	Chian (Guizhou)	Ⅳ
lan	Yumai 19	Modern cultivar	1991-2000	China (Henan)	Ⅱ
lan	Shannong 45	Modern cultivar	1991-2000	China (Shandong)	Ⅱ
lan	Jihe 161	Modern cultivar	1991-2000	China (Shanxi)	Ⅱ
mod	Gaoyou 8901	Modern cultivar	1991-2000	China (Hebei)	Ⅰ
mod	Xinmai 9	Modern cultivar	1991-2000	China (Henan)	Ⅱ
mod	Yangmai 9	Modern cultivar	1991-2000	China (Jiangsu)	Ⅲ
mod	Xinong 2611	Modern cultivar	1991-2000	China (Shanxi)	Ⅱ
mod	Wanmai 38	Modern cultivar	1991-2000	China (Anhui)	Ⅱ
mod	Taikong 6	Modern cultivar	1991-2000	China (Henan)	Ⅱ
mod	Handan 6172	Modern cultivar	1991-2000	China (Hebei)	Ⅰ
mod	Xinong 1376	Modern cultivar	1991-2000	China (Shaanxi)	Ⅰ
mod	Xianzhang 1	Modern cultivar	1991-2000	China (Henan)	Ⅱ
mod	Mianyang 31	Modern cultivar	1991-2000	China (Sichuan)	Ⅳ
mod	Xinmai 16	Modern cultivar	1991-2000	China (Henan)	Ⅱ
mod	Pumai 9	Modern cultivar	1991-2000	China (Henan)	Ⅱ
mod	Zhongyou 9507	Modern cultivar	1991-2000	China (Beijing)	Ⅰ
mod	Yunmai 56	Modern cultivar	1991-2000	China (Yunnan)	Ⅳ
mod	Wanmai 29	Modern cultivar	1991-2000	China (Anhui)	Ⅱ
mod	Jimai 17	Modern cultivar	1991-2000	China (Shandong)	Ⅱ
lan	Heng 0628	Modern cultivar	2001-2010	China (Hebei)	Ⅰ
lan	Jingdong 23	Modern cultivar	2001-2010	China (Hebei)	Ⅰ
lan	Heng 216	Modern cultivar	2001-2010	China (Hebei)	Ⅰ
lan	Huaiyin 9628	Modern cultivar	2001-2010	China (Jiangsu)	Ⅲ
lan	Shannong 42	Modern cultivar	2001-2010	China (Shandong)	Ⅱ
lan	Henong 9204	Modern cultivar	2001-2010	China (Hebei)	Ⅰ
lan	Hemai 0643-2	Modern cultivar	2001-2010	China (Shandong)	Ⅱ
lan	SN666	Modern cultivar	2001-2010	China (Shandong)	Ⅱ
lan	QX177	Modern cultivar	2001-2010	China (Shandong)	Ⅱ
lan	Shannong 43	Modern cultivar	2001-2010	China (Shandong)	Ⅱ
lan	Lin 091	Modern cultivar	2001-2010	China (Shandong)	Ⅱ
lan	Jimai 418	Modern cultivar	2001-2010	China (Shandong)	Ⅱ
lan	Keyuan 77	Modern cultivar	2001-2010	China (Shandong)	Ⅱ
lan	Kenxing 5	Modern cultivar	2001-2010	China (Shandong)	Ⅱ
lan	Hemai 20	Modern cultivar	2001-2010	China (Shandong)	Ⅱ
lan	Su 553	Modern cultivar	2001-2010	China (Anhui)	Ⅱ
lan	Shenmai 818	Modern cultivar	2001-2010	China (Shandong)	Ⅱ
lan	Jining 07412	Modern cultivar	2001-2010	China (Shandong)	Ⅱ
lan	Shengmai 105	Modern cultivar	2001-2010	China (Shandong)	Ⅱ
lan	Huaimai 33	Modern cultivar	2001-2010	China (Jiangsu)	Ⅲ
lan	Zimai 603	Modern cultivar	2001-2010	China (Henan)	Ⅱ
lan	Shannong 111	Modern cultivar	2001-2010	China (Shandong)	Ⅱ
lan	Pubing 4197	Modern cultivar	2001-2010	China (Shandong)	Ⅱ
lan	LS4223	Modern cultivar	2001-2010	China (Shandong)	Ⅱ
lan	Jimai 22	Modern cultivar	2001-2010	China (Shandong)	Ⅱ
lan	Yannong 19	Modern cultivar	2001-2010	China (Shandong)	Ⅱ
lan	Zhongxin 78	Modern cultivar	2001-2010	China (Henan)	Ⅱ
lan	Fengyou 68	Modern cultivar	2001-2010	China (Hebei)	Ⅰ
lan	Liangxing 99	Modern cultivar	2001-2010	China (Shandong)	Ⅱ
lan	Tainong 18	Modern cultivar	2001-2010	China (Shandong)	Ⅱ
lan	Changhan 58	Modern cultivar	2001-2010	China (Shaanxi)	Ⅰ
lan	Henong 4198	Modern cultivar	2001-2010	China (Hebei)	Ⅰ
lan	Jimai 955159	Modern cultivar	2001-2010	China (Shandong)	Ⅱ
lan	Xingmai 18	Modern cultivar	2001-2010	China (Hebei)	Ⅰ
mod	Henong 6425	Modern cultivar	2001-2010	China (Hebei)	Ⅰ
mod	Shiyou 17	Modern cultivar	2001-2010	China (Hebei)	Ⅰ
mod	. Jingdong 24	Modern cultivar	2001-2010	China (Hebei)	Ⅰ
mod	Henong 5290	Modern cultivar	2001-2010	China (Hebei)	Ⅰ
mod	Xiaoshan 9659	Modern cultivar	2001-2010	China (Hebei)	Ⅰ
mod	Henong 826	Modern cultivar	2001-2010	China (Hebei)	Ⅰ
mod	Lunxuan 061	Modern cultivar	2001-2010	China (Hebei)	Ⅰ
mod	Henong 9206	Modern cultivar	2001-2010	China (Hebei)	Ⅰ
mod	Jinqiang 6	Modern cultivar	2001-2010	China (Hebei)	Ⅰ
mod	Zhumai 4	Modern cultivar	2001-2010	China (Henan)	Ⅱ
mod	Zhoumai 17	Modern cultivar	2001-2010	China (Henan)	Ⅱ
mod	Zhoumai 20	Modern cultivar	2001-2010	China (Henan)	Ⅱ
mod	Zhoumai 21	Modern cultivar	2001-2010	China (Henan)	Ⅱ
mod	Zhengmai 7698	Modern cultivar	2001-2010	China (Henan)	Ⅱ
mod	Jindi 828	Modern cultivar	2001-2010	China (Henan)	Ⅱ
mod	Ningmai 19	Modern cultivar	2001-2010	China (Jiangsu)	Ⅲ
mod	Ningmai 24	Modern cultivar	2001-2010	China (Jiangsu)	Ⅲ
mod	Xumai 1108 (Xumai 36)	Modern cultivar	2001-2010	China (Jiangsu)	Ⅲ
mod	Taikemai 33	Modern cultivar	2001-2010	China (Shandong)	Ⅱ
mod	Zimai 28	Modern cultivar	2001-2010	China (Shandong)	Ⅱ
mod	ZH4261	Modern cultivar	2001-2010	China (Shandong)	Ⅱ
mod	Huiyan 912	Modern cultivar	2001-2010	China (Anhui)	Ⅱ
mod	Junda 139	Modern cultivar	2001-2010	China (Henan)	Ⅱ
mod	Hongdi 166	Modern cultivar	2001-2010	China (Shandong)	Ⅱ
mod	QF033	Modern cultivar	2001-2010	China (Shandong)	Ⅱ
mod	Jimai 44	Modern cultivar	2001-2010	China (Shandong)	Ⅱ
mod	Qiule 2122	Modern cultivar	2001-2010	China (Henan)	Ⅱ
mod	Shi 14-6111	Modern cultivar	2001-2010	China (Hebei)	Ⅰ
mod	Huaimai 30	Modern cultivar	2001-2010	China (Jiangsu)	Ⅲ
mod	Wanmai 68 (Zhongkang Bai)	Modern cultivar	2001-2010	China (Anhui)	Ⅱ
mod	Jimai 520	Modern cultivar	2001-2010	China (Hebei)	Ⅰ
mod	Puxing 5	Modern cultivar	2001-2010	China (Henan)	Ⅱ
mod	Shannong 116	Modern cultivar	2001-2010	China (Shandong)	Ⅱ
mod	Luyan 733	Modern cultivar	2001-2010	China (Shandong)	Ⅱ
mod	Huiyan 1515	Modern cultivar	2001-2010	China (Anhui)	Ⅱ
mod	Qingzhao 17	Modern cultivar	2001-2010	China (Shandong)	Ⅱ
mod	Shannong 737	Modern cultivar	2001-2010	China (Shandong)	Ⅱ
mod	Denghai 206	Modern cultivar	2001-2010	China (Shandong)	Ⅱ
mod	Cunmai 8	Modern cultivar	2001-2010	China (Henan)	Ⅱ
mod	Ningchun 39	Modern cultivar	2001-2010	China (Ningxia)	Ⅷ
mod	Chuanmai 104	Modern cultivar	2001-2010	China (Sichuan)	Ⅳ
mod	Aikang 58	Modern cultivar	2001-2010	China (Henan)	Ⅱ
mod	Bainong 207	Modern cultivar	2001-2010	China (Henan)	Ⅱ
mod	Yumai 49 (Wenmai 6)	Modern cultivar	2001-2010	China (Henan)	Ⅱ
mod	Shi 4185	Modern cultivar	2001-2010	China (Hebei)	Ⅰ
mod	Gaoyou 9415	Modern cultivar	2001-2010	China (Hebei)	Ⅰ
mod	Xinong 979	Modern cultivar	2001-2010	China (Shaanxi)	Ⅰ
mod	Xiaoyan 22	Modern cultivar	2001-2010	China (Shaanxi)	Ⅰ
mod	Xinmai 18	Modern cultivar	2001-2010	China (Henan)	Ⅱ
mod	Zhengmai 366	Modern cultivar	2001-2010	China (Henan)	Ⅱ
mod	Yangmai 20	Modern cultivar	2001-2010	China (Jiangsu)	Ⅲ
mod	Xuzhou 21	Modern cultivar	2001-2010	China (Jiangsu)	Ⅲ
mod	Zhoumai 18	Modern cultivar	2001-2010	China (Henan)	Ⅱ
mod	Chuanmai 42	Modern cultivar	2001-2010	China (Sichuan)	Ⅳ
mod	Zhengmai 9023	Modern cultivar	2001-2010	China (Henan)	Ⅱ
mod	Hua 2668	Modern cultivar	2001-2010	China (Hubei)	Ⅲ
mod	Chuan 06 Pin 9	Modern cultivar	2001-2010	China (Sichuan)	Ⅳ
mod	Mianmai 47	Modern cultivar	2001-2010	China (Sichuan)	Ⅳ
mod	Ningmai 15	Modern cultivar	2001-2010	China (Jiangsu)	Ⅲ
mod	Xinong 223	Modern cultivar	2001-2010	China (Shaanxi)	Ⅰ
mod	Yunong 416	Modern cultivar	2001-2010	China (Henan)	Ⅱ
mod	Emai 23	Modern cultivar	2001-2010	China (Hubei)	Ⅲ
mod	Xinmai 9408	Modern cultivar	2001-2010	China (Henan)	Ⅱ
mod	Emai 21	Modern cultivar	2001-2010	China (Hubei)	Ⅲ
mod	Shannong 715	Modern cultivar	2001-2010	China (Shaanxi)	Ⅰ
mod	Xinfumai 1	Modern cultivar	2001-2010	China (Anhui)	Ⅱ
mod	Huamai 5	Modern cultivar	2001-2010	China (Jiangsu)	Ⅲ
mod	Linkang 11	Modern cultivar	2001-2010	China (Shanxi)	Ⅱ
mod	Shannong 253	Modern cultivar	2001-2010	China (Shaanxi)	Ⅰ
mod	Rumai 0319	Modern cultivar	2001-2010	China (Henan)	Ⅱ
mod	Wennong 6	Modern cultivar	2001-2010	China (Shandong)	Ⅱ
mod	Zhongyu 8	Modern cultivar	2001-2010	China (Henan)	Ⅱ
mod	Xunong 7	Modern cultivar	2001-2010	China (Henan)	Ⅱ
mod	Neimai 836	Modern cultivar	2001-2010	China (Sichuan)	Ⅳ
mod	Xinong 509	Modern cultivar	2001-2010	China (Shaanxi)	Ⅰ
mod	Xinong 9871	Modern cultivar	2001-2010	China (Shaanxi)	Ⅰ
mod	Liangxing 68	Modern cultivar	2001-2010	China (Shanxi)	Ⅱ
mod	Henong 825	Modern cultivar	2001-2010	China (Hebei)	Ⅰ
mod	Shimai 21	Modern cultivar	2001-2010	China (Hebei)	Ⅰ
mod	Jinghua 9	Modern cultivar	2001-2010	China (Hebei)	Ⅰ
mod	Ningmai 13	Modern cultivar	2001-2010	China (Jiangsu)	Ⅲ
mod	Jinan 17	Modern cultivar	2001-2010	China (Shandong)	Ⅱ
mod	Yannong 103	Modern cultivar	2001-2010	China (Shandong)	Ⅱ
mod	Changwu 521	Modern cultivar	2001-2010	China (Shaanxi)	Ⅰ
mod	Chang 6135	Modern cultivar	2001-2010	China (Shanxi)	Ⅱ
mod	Lin Y8159	Modern cultivar	2001-2010	China (Shanxi)	Ⅱ
mod	Xinong 389	Modern cultivar	2001-2010	China (Shaanxi)	Ⅰ
mod	Fanmai 8	Modern cultivar	2001-2010	China (Henan)	Ⅱ
mod	Daimai 4366	Modern cultivar	2001-2010	China (Shandong)	Ⅱ
mod	Cunmai 1	Modern cultivar	2001-2010	China (Henan)	Ⅱ
mod	Gaoyou 9908	Modern cultivar	2001-2010	China (Hebei)	Ⅰ
mod	Cangmai 2016-2	Modern cultivar	2001-2010	China (Hebei)	Ⅰ
mod	Denghai 202	Modern cultivar	2001-2010	China (Shandong)	Ⅱ
mod	Ningnuo 1 (Ningnuomai 1)	Modern cultivar	2001-2010	China (Jiangsu)	Ⅲ
mod	Xinmai 25	Modern cultivar	2001-2010	China (Henan)	Ⅱ
mod	Luohan 9	Modern cultivar	2001-2010	China (Henan)	Ⅱ
mod	Luohan 12	Modern cultivar	2001-2010	China (Henan)	Ⅱ
mod	Taikemai 30	Modern cultivar	2001-2010	China (Shandong)	Ⅱ
mod	Taikemai 31	Modern cultivar	2001-2010	China (Shandong)	Ⅱ
mod	Xinong 9718	Modern cultivar	2001-2010	China (Shaanxi)	Ⅰ
lan	Jinnong 328	Modern cultivar	2011-2020	China (Hebei)	Ⅰ
lan	Jinmai 919	Modern cultivar	2011-2020	China (Hebei)	Ⅰ
lan	Jinmai 66	Modern cultivar	2011-2020	China (Hebei)	Ⅰ
lan	Jinnong 58	Modern cultivar	2011-2020	China (Hebei)	Ⅰ
lan	Huayu 989	Modern cultivar	2011-2020	China (Hebei)	Ⅰ
lan	Jiamai 361	Modern cultivar	2011-2020	China (Hebei)	Ⅰ
lan	Jintai 141	Modern cultivar	2011-2020	China (Hebei)	Ⅰ
lan	Henong 6426	Modern cultivar	2011-2020	China (Hebei)	Ⅰ
lan	Zhongheimai 6	Modern cultivar	2011-2020	China (Hebei)	Ⅰ
lan	Shinong 086	Modern cultivar	2011-2020	China (Hebei)	Ⅰ
lan	Womai 4176	Modern cultivar	2011-2020	China (Hebei)	Ⅰ
lan	Taimai 101	Modern cultivar	2011-2020	China (Hebei)	Ⅰ
lan	Pinyu 8012	Modern cultivar	2011-2020	China (Hebei)	Ⅰ
lan	Jinhe 12339	Modern cultivar	2011-2020	China (Hebei)	Ⅰ
lan	Cangmai 15	Modern cultivar	2011-2020	China (Hebei)	Ⅰ
lan	Cangmai 14	Modern cultivar	2011-2020	China (Hebei)	Ⅰ
lan	Jintai 9923	Modern cultivar	2011-2020	China (Hebei)	Ⅰ
lan	Yingyi 165	Modern cultivar	2011-2020	China (Hebei)	Ⅰ
lan	Yuanmai 1	Modern cultivar	2011-2020	China (Hebei)	Ⅰ
lan	Henong 128	Modern cultivar	2011-2020	China (Hebei)	Ⅰ
lan	Letu 808	Modern cultivar	2011-2020	China (Hebei)	Ⅰ
lan	Lunxuan 13	Modern cultivar	2011-2020	China (Hebei)	Ⅰ
lan	Lunxuan 16	Modern cultivar	2011-2020	China (Hebei)	Ⅰ
lan	Linyan 151	Modern cultivar	2011-2020	China (Hebei)	Ⅰ
lan	Longmai 2	Modern cultivar	2011-2020	China (Hebei)	Ⅰ
lan	Wanfeng 673	Modern cultivar	2011-2020	China (Hebei)	Ⅰ
lan	Limai 1	Modern cultivar	2011-2020	China (Hebei)	Ⅰ
lan	Zhongxinmai 78	Modern cultivar	2011-2020	China (Hebei)	Ⅰ
lan	Gaomai 5818	Modern cultivar	2011-2020	China (Hebei)	Ⅰ
lan	Shimai 29	Modern cultivar	2011-2020	China (Hebei)	Ⅰ
lan	Ketengmai 8	Modern cultivar	2011-2020	China (Hebei)	Ⅰ
lan	Zhongxinmai 58	Modern cultivar	2011-2020	China (Hebei)	Ⅰ
lan	Zhongxinmai 28	Modern cultivar	2011-2020	China (Hebei)	Ⅰ
lan	Taimai 103	Modern cultivar	2011-2020	China (Hebei)	Ⅰ
lan	Gaoyou 6678	Modern cultivar	2011-2020	China (Hebei)	Ⅰ
lan	Zhonglanmai 1	Modern cultivar	2011-2020	China (Hebei)	Ⅰ
lan	Ketengmai 16	Modern cultivar	2011-2020	China (Hebei)	Ⅰ
lan	Zhongmai 23	Modern cultivar	2011-2020	China (Hebei)	Ⅰ
lan	Shoumai 6	Modern cultivar	2011-2020	China (Hebei)	Ⅰ
lan	Shimai 25	Modern cultivar	2011-2020	China (Hebei)	Ⅰ
lan	Yingman 208	Modern cultivar	2011-2020	China (Henan)	Ⅱ
lan	Fengdecunmai 21	Modern cultivar	2011-2020	China (Henan)	Ⅱ
lan	Xinmai 69	Modern cultivar	2011-2020	China (Henan)	Ⅱ
lan	Zhongmai 578	Modern cultivar	2011-2020	China (Henan)	Ⅱ
lan	Jixing 653	Modern cultivar	2011-2020	China (Henan)	Ⅱ
lan	Zhongzhi 0914	Modern cultivar	2011-2020	China (Henan)	Ⅱ
lan	Lianmai 10	Modern cultivar	2011-2020	China (Jiangsu)	Ⅲ
lan	Jiangmai 869	Modern cultivar	2011-2020	China (Jiangsu)	Ⅲ
lan	Nongmai 188	Modern cultivar	2011-2020	China (Jiangsu)	Ⅲ
lan	Nongmai 152	Modern cultivar	2011-2020	China (Jiangsu)	Ⅲ
lan	Nongmai 158	Modern cultivar	2011-2020	China (Jiangsu)	Ⅲ
lan	Qianmai 3	Modern cultivar	2011-2020	China (Jiangsu)	Ⅲ
lan	Qingnong 6	Modern cultivar	2011-2020	China (Shandong)	Ⅱ
lan	Ruihuamai 506	Modern cultivar	2011-2020	China (Jiangsu)	Ⅲ
lan	Xumai 39	Modern cultivar	2011-2020	China (Jiangsu)	Ⅲ
lan	Ruihuamai 528	Modern cultivar	2011-2020	China (Jiangsu)	Ⅲ
lan	Xumai 38	Modern cultivar	2011-2020	China (Jiangsu)	Ⅲ
lan	Ruihuamai 218	Modern cultivar	2011-2020	China (Jiangsu)	Ⅲ
lan	Sancan Heimai 1	Modern cultivar	2011-2020	China (Hebei)	Ⅰ
lan	Jixing 868	Modern cultivar	2011-2020	China (Hebei)	Ⅰ
lan	Hengmai 26 (Heng 1589)	Modern cultivar	2011-2020	China (Hebei)	Ⅰ
lan	Bomai 7	Modern cultivar	2011-2020	China (Hebei)	Ⅰ
lan	Linhan 8	Modern cultivar	2011-2020	China (Shanxi)	Ⅱ
lan	Tai 615	Modern cultivar	2011-2020	China (Shanxi)	Ⅱ
lan	Changmai 3809	Modern cultivar	2011-2020	China (Shanxi)	Ⅱ
lan	Jinmai 98	Modern cultivar	2011-2020	China (Shanxi)	Ⅱ
lan	Jiushenghe D1508	Modern cultivar	2011-2020	China (Xinjiang)	Ⅹ
lan	Tai 412	Modern cultivar	2011-2020	China (Shanxi)	Ⅱ
lan	Ruihuamai 596	Modern cultivar	2011-2020	China (Jiangsu)	Ⅲ
lan	Shumai 580	Modern cultivar	2011-2020	China (Sichuan)	Ⅳ
lan	Shixin 6171	Modern cultivar	2011-2020	China (Hebei)	Ⅰ
lan	Shixin 952 (Shinong 952)	Modern cultivar	2011-2020	China (Hebei)	Ⅰ
lan	Huaimai 0705	Modern cultivar	2011-2020	China (Jiangsu)	Ⅲ
lan	Huangjinmai 7 (Zhongxin 3166)	Modern cultivar	2011-2020	China (Shandong)	Ⅱ
lan	Fuzhao 5066 (Jinmai 5066-1)	Modern cultivar	2011-2020	China (Hebei)	Ⅰ
lan	Wanfeng 826 (WF826)	Modern cultivar	2011-2020	China (Hebei)	Ⅰ
mod	Xifeng 58	Modern cultivar	2011-2020	China (Hebei)	Ⅰ
mod	Heng H1401	Modern cultivar	2011-2020	China (Hebei)	Ⅰ
mod	Taizi 6336	Modern cultivar	2011-2020	China (Hebei)	Ⅰ
mod	Shi 4366	Modern cultivar	2011-2020	China (Hebei)	Ⅰ
mod	Zhongmai 5051	Modern cultivar	2011-2020	China (Hebei)	Ⅰ
mod	Changmai 6789	Modern cultivar	2011-2020	China (Hebei)	Ⅰ
mod	Zhongmai 895	Modern cultivar	2011-2020	China (Hebei)	Ⅰ
mod	Hansheng 730	Modern cultivar	2011-2020	China (Hebei)	Ⅰ
mod	Womai 608	Modern cultivar	2011-2020	China (Hebei)	Ⅰ
mod	Shinong 956	Modern cultivar	2011-2020	China (Hebei)	Ⅰ
mod	Shixin 7018	Modern cultivar	2011-2020	China (Hebei)	Ⅰ
mod	Zhongmai 29	Modern cultivar	2011-2020	China (Hebei)	Ⅰ
mod	Jinnong 7	Modern cultivar	2011-2020	China (Hebei)	Ⅰ
mod	Zhongmai 122	Modern cultivar	2011-2020	China (Hebei)	Ⅰ
mod	Heng 5835	Modern cultivar	2011-2020	China (Hebei)	Ⅰ
mod	Hannong 7131	Modern cultivar	2011-2020	China (Hebei)	Ⅰ
mod	Jinqiang 7	Modern cultivar	2011-2020	China (Hebei)	Ⅰ
mod	Hansheng Heimai 1	Modern cultivar	2011-2020	China (Hebei)	Ⅰ
mod	Zhongmai 93	Modern cultivar	2011-2020	China (Hebei)	Ⅰ
mod	Yufeng 11	Modern cultivar	2011-2020	China (Henan)	Ⅱ
mod	Shangmai 156	Modern cultivar	2011-2020	China (Henan)	Ⅱ
mod	Shengmai 15	Modern cultivar	2011-2020	China (Henan)	Ⅱ
mod	Shangmai 167	Modern cultivar	2011-2020	China (Henan)	Ⅱ
mod	Yunong 186	Modern cultivar	2011-2020	China (Henan)	Ⅱ
mod	Yunong 78	Modern cultivar	2011-2020	China (Henan)	Ⅱ
mod	Qiule 6	Modern cultivar	2011-2020	China (Henan)	Ⅱ
mod	Zhengke 137	Modern cultivar	2011-2020	China (Henan)	Ⅱ
mod	Zhenmai 3	Modern cultivar	2011-2020	China (Henan)	Ⅱ
mod	Zhengmai 22	Modern cultivar	2011-2020	China (Henan)	Ⅱ
mod	Zhengmai 369	Modern cultivar	2011-2020	China (Henan)	Ⅱ
mod	Zhengmai 618	Modern cultivar	2011-2020	China (Henan)	Ⅱ
mod	Yunong 98	Modern cultivar	2011-2020	China (Henan)	Ⅱ
mod	Yushengmai 21	Modern cultivar	2011-2020	China (Henan)	Ⅱ
mod	Yuxin 11	Modern cultivar	2011-2020	China (Henan)	Ⅱ
mod	Yuntai 301	Modern cultivar	2011-2020	China (Henan)	Ⅱ
mod	Zhengpinyou 9	Modern cultivar	2011-2020	China (Henan)	Ⅱ
mod	Zhengmai 6687	Modern cultivar	2011-2020	China (Henan)	Ⅱ
mod	Anmai 1241	Modern cultivar	2011-2020	China (Henan)	Ⅱ
mod	Anmai 1350	Modern cultivar	2011-2020	China (Henan)	Ⅱ
mod	Baigan 207	Modern cultivar	2011-2020	China (Henan)	Ⅱ
mod	Baimai 1811	Modern cultivar	2011-2020	China (Henan)	Ⅱ
mod	Zaoxiang 158	Modern cultivar	2011-2020	China (Henan)	Ⅱ
mod	Zaoxiang 168	Modern cultivar	2011-2020	China (Henan)	Ⅱ
mod	Suixuan 101	Modern cultivar	2011-2020	China (Henan)	Ⅱ
mod	Shunmai 6	Modern cultivar	2011-2020	China (Henan)	Ⅱ
mod	Taihema 1	Modern cultivar	2011-2020	China (Henan)	Ⅱ
mod	Aimai 24	Modern cultivar	2011-2020	China (Henan)	Ⅱ
mod	Dapingyuan 1	Modern cultivar	2011-2020	China (Henan)	Ⅱ
mod	Jiayuan 6	Modern cultivar	2011-2020	China (Henan)	Ⅱ
mod	Ping'an 518	Modern cultivar	2011-2020	China (Henan)	Ⅱ
mod	Tianmin 304	Modern cultivar	2011-2020	China (Henan)	Ⅱ
mod	Chunxiao 158	Modern cultivar	2011-2020	China (Henan)	Ⅱ
mod	Changmai 15	Modern cultivar	2011-2020	China (Henan)	Ⅱ
mod	Danmai 118	Modern cultivar	2011-2020	China (Henan)	Ⅱ
mod	Huaichuan 919	Modern cultivar	2011-2020	China (Henan)	Ⅱ
mod	Junmai 118	Modern cultivar	2011-2020	China (Henan)	Ⅱ
mod	Hemai 988	Modern cultivar	2011-2020	China (Henan)	Ⅱ
mod	Luohan 17	Modern cultivar	2011-2020	China (Henan)	Ⅱ
mod	Luomai 26	Modern cultivar	2011-2020	China (Henan)	Ⅱ
mod	Mengmai 023	Modern cultivar	2011-2020	China (Henan)	Ⅱ
mod	Keda 668	Modern cultivar	2011-2020	China (Henan)	Ⅱ
mod	Tianning 38	Modern cultivar	2011-2020	China (Henan)	Ⅱ
mod	Cunmai 11	Modern cultivar	2011-2020	China (Henan)	Ⅱ
mod	Changmai 18	Modern cultivar	2011-2020	China (Henan)	Ⅱ
mod	Deyan 16	Modern cultivar	2011-2020	China (Henan)	Ⅱ
mod	Hefeng 3	Modern cultivar	2011-2020	China (Henan)	Ⅱ
mod	Junmai 169	Modern cultivar	2011-2020	China (Henan)	Ⅱ
mod	Luohan 19	Modern cultivar	2011-2020	China (Henan)	Ⅱ
mod	Mengmai 0818	Modern cultivar	2011-2020	China (Henan)	Ⅱ
mod	Kelinmai 969	Modern cultivar	2011-2020	China (Henan)	Ⅱ
mod	Pumai 053	Modern cultivar	2011-2020	China (Henan)	Ⅱ
mod	Saidemai 7	Modern cultivar	2011-2020	China (Henan)	Ⅱ
mod	Bainong 889	Modern cultivar	2011-2020	China (Henan)	Ⅱ
mod	Zhaofeng 3188	Modern cultivar	2011-2020	China (Henan)	Ⅱ
mod	Cunmai 16	Modern cultivar	2011-2020	China (Henan)	Ⅱ
mod	Deyan 8	Modern cultivar	2011-2020	China (Henan)	Ⅱ
mod	Guangtai 68	Modern cultivar	2011-2020	China (Henan)	Ⅱ
mod	Jimai 210	Modern cultivar	2011-2020	China (Henan)	Ⅱ
mod	Junmai 802	Modern cultivar	2011-2020	China (Henan)	Ⅱ
mod	Luohan 27	Modern cultivar	2011-2020	China (Henan)	Ⅱ
mod	Minfeng 3	Modern cultivar	2011-2020	China (Henan)	Ⅱ
mod	Lifeng 852	Modern cultivar	2011-2020	China (Henan)	Ⅱ
mod	Pumai 087	Modern cultivar	2011-2020	China (Henan)	Ⅱ
mod	Xinmai 32	Modern cultivar	2011-2020	China (Henan)	Ⅱ
mod	Chenbo 998	Modern cultivar	2011-2020	China (Henan)	Ⅱ
mod	Changmai 20	Modern cultivar	2011-2020	China (Henan)	Ⅱ
mod	Cunmai 18	Modern cultivar	2011-2020	China (Henan)	Ⅱ
mod	Tunmai 127	Modern cultivar	2011-2020	China (Henan)	Ⅱ
mod	Guanmai 2	Modern cultivar	2011-2020	China (Henan)	Ⅱ
mod	Jiyanmai 7	Modern cultivar	2011-2020	China (Henan)	Ⅱ
mod	Kaimai 1502	Modern cultivar	2011-2020	China (Henan)	Ⅱ
mod	Luomai 34	Modern cultivar	2011-2020	China (Henan)	Ⅱ
mod	Liangyuan 22	Modern cultivar	2011-2020	China (Henan)	Ⅱ
mod	Tianmin 184	Modern cultivar	2011-2020	China (Henan)	Ⅱ
mod	Xinmai 39	Modern cultivar	2011-2020	China (Henan)	Ⅱ
mod	Wanmai 66	Modern cultivar	2011-2020	China (Henan)	Ⅱ
mod	Xuyanmai 3	Modern cultivar	2011-2020	China (Henan)	Ⅱ
mod	Yanbo 330	Modern cultivar	2011-2020	China (Henan)	Ⅱ
mod	Tianmai 166	Modern cultivar	2011-2020	China (Henan)	Ⅱ
mod	Huawei 303	Modern cultivar	2011-2020	China (Henan)	Ⅱ
mod	Quanmai 29	Modern cultivar	2011-2020	China (Henan)	Ⅱ
mod	Xumai 318	Modern cultivar	2011-2020	China (Henan)	Ⅱ
mod	Huawei 305	Modern cultivar	2011-2020	China (Henan)	Ⅱ
mod	Junda 109	Modern cultivar	2011-2020	China (Henan)	Ⅱ
mod	Xianmai 18	Modern cultivar	2011-2020	China (Henan)	Ⅱ
mod	Pingmai 189	Modern cultivar	2011-2020	China (Henan)	Ⅱ
mod	Xuke 168	Modern cultivar	2011-2020	China (Henan)	Ⅱ
mod	Fanmai 536	Modern cultivar	2011-2020	China (Henan)	Ⅱ
mod	Huayumai 1	Modern cultivar	2011-2020	China (Henan)	Ⅱ
mod	Junda Zimai 603	Modern cultivar	2011-2020	China (Henan)	Ⅱ
mod	Xindifeng 168	Modern cultivar	2011-2020	China (Henan)	Ⅱ
mod	Fengdecunmai 22	Modern cultivar	2011-2020	China (Henan)	Ⅱ
mod	Huaichuan 101	Modern cultivar	2011-2020	China (Henan)	Ⅱ
mod	Jinxiu 21	Modern cultivar	2011-2020	China (Henan)	Ⅱ
mod	Wodemai 365	Modern cultivar	2011-2020	China (Henan)	Ⅱ
mod	Huaichuan 66	Modern cultivar	2011-2020	China (Henan)	Ⅱ
mod	Junda 104	Modern cultivar	2011-2020	China (Henan)	Ⅱ
mod	Xinong 239	Modern cultivar	2011-2020	China (Henan)	Ⅱ
mod	Xiantianmai 12	Modern cultivar	2011-2020	China (Henan)	Ⅱ
mod	Xuke 129	Modern cultivar	2011-2020	China (Henan)	Ⅱ
mod	Fengyou 3596	Modern cultivar	2011-2020	China (Henan)	Ⅱ
mod	Hemai 601	Modern cultivar	2011-2020	China (Henan)	Ⅱ
mod	Wenmai 968	Modern cultivar	2011-2020	China (Henan)	Ⅱ
mod	Xinkemai 168	Modern cultivar	2011-2020	China (Henan)	Ⅱ
mod	Pumai 8062	Modern cultivar	2011-2020	China (Henan)	Ⅱ
mod	Fengxuan 369	Modern cultivar	2011-2020	China (Henan)	Ⅱ
mod	Fanmai 803	Modern cultivar	2011-2020	China (Henan)	Ⅱ
mod	Jinfeng 205	Modern cultivar	2011-2020	China (Henan)	Ⅱ
mod	Wenyuan 0528	Modern cultivar	2011-2020	China (Henan)	Ⅱ
mod	Puxing 8	Modern cultivar	2011-2020	China (Henan)	Ⅱ
mod	Gaomai 6	Modern cultivar	2011-2020	China (Henan)	Ⅱ
mod	Fanyumai 20	Modern cultivar	2011-2020	China (Henan)	Ⅱ
mod	Wanmai 202	Modern cultivar	2011-2020	China (Henan)	Ⅱ
mod	Yangao 58	Modern cultivar	2011-2020	China (Henan)	Ⅱ
mod	Qifeng 5	Modern cultivar	2011-2020	China (Henan)	Ⅱ
mod	Fanyumai 18	Modern cultivar	2011-2020	China (Henan)	Ⅱ
mod	Fangyumai 66	Modern cultivar	2011-2020	China (Henan)	Ⅱ
mod	Wanmai 21	Modern cultivar	2011-2020	China (Henan)	Ⅱ
mod	Xuyanmai 4	Modern cultivar	2011-2020	China (Henan)	Ⅱ
mod	Yanke 048	Modern cultivar	2011-2020	China (Henan)	Ⅱ
mod	Qiule 168	Modern cultivar	2011-2020	China (Henan)	Ⅱ
mod	Tunmai 128	Modern cultivar	2011-2020	China (Henan)	Ⅱ
mod	Huamai 998	Modern cultivar	2011-2020	China (Henan)	Ⅱ
mod	Wanmai 632	Modern cultivar	2011-2020	China (Henan)	Ⅱ
mod	Yamai 1	Modern cultivar	2011-2020	China (Henan)	Ⅱ
mod	Yangguang 578	Modern cultivar	2011-2020	China (Henan)	Ⅱ
mod	Tunmai 257	Modern cultivar	2011-2020	China (Henan)	Ⅱ
mod	Huamai 999	Modern cultivar	2011-2020	China (Henan)	Ⅱ
mod	Fengdecunmai 20	Modern cultivar	2011-2020	China (Henan)	Ⅱ
mod	Zhengmai 6694	Modern cultivar	2011-2020	China (Henan)	Ⅱ
mod	Caimai 116	Modern cultivar	2011-2020	China (Henan)	Ⅱ
mod	Ruixingmai 618	Modern cultivar	2011-2020	China (Henan)	Ⅱ
mod	Nongmai 18	Modern cultivar	2011-2020	China (Henan)	Ⅱ
mod	Zhengmai 925	Modern cultivar	2011-2020	China (Henan)	Ⅱ
mod	Baojingmai 161	Modern cultivar	2011-2020	China (Henan)	Ⅱ
mod	Jinchengmai 17	Modern cultivar	2011-2020	China (Henan)	Ⅱ
mod	Shangmai 8	Modern cultivar	2011-2020	China (Henan)	Ⅱ
mod	Jinli 9	Modern cultivar	2011-2020	China (Henan)	Ⅱ
mod	Heda 518	Modern cultivar	2011-2020	China (Henan)	Ⅱ
mod	Zhongyu 1123	Modern cultivar	2011-2020	China (Henan)	Ⅱ
mod	Jinmai 35	Modern cultivar	2011-2020	China (Henan)	Ⅱ
mod	Zhongyu 1220	Modern cultivar	2011-2020	China (Henan)	Ⅱ
mod	Juchengmai 6	Modern cultivar	2011-2020	China (Henan)	Ⅱ
mod	Zhongyu 1428	Modern cultivar	2011-2020	China (Henan)	Ⅱ
mod	Zhengpinmai 8	Modern cultivar	2011-2020	China (Henan)	Ⅱ
mod	Zhengyumai 16	Modern cultivar	2011-2020	China (Henan)	Ⅱ
mod	Zhongyu 1686	Modern cultivar	2011-2020	China (Henan)	Ⅱ
mod	Zhongyu 9302	Modern cultivar	2011-2020	China (Henan)	Ⅱ
mod	Yufeng 307	Modern cultivar	2011-2020	China (Henan)	Ⅱ
mod	Lunxuan 69	Modern cultivar	2011-2020	China (Henan)	Ⅱ
mod	Zhengpinmai 26	Modern cultivar	2011-2020	China (Henan)	Ⅱ
mod	Junmai 8202	Modern cultivar	2011-2020	China (Henan)	Ⅱ
mod	Tianmai 119	Modern cultivar	2011-2020	China (Henan)	Ⅱ
mod	Fanmai 7030	Modern cultivar	2011-2020	China (Henan)	Ⅱ
mod	Zhengpinmai 24	Modern cultivar	2011-2020	China (Henan)	Ⅱ
mod	Zhengpinmai 25	Modern cultivar	2011-2020	China (Henan)	Ⅱ
mod	Xumai 2	Modern cultivar	2011-2020	China (Henan)	Ⅱ
mod	Liumai 618	Modern cultivar	2011-2020	China (Anhui)	Ⅱ
mod	Liumai 716	Modern cultivar	2011-2020	China (Anhui)	Ⅱ
mod	Luyan 128	Modern cultivar	2011-2020	China (Anhui)	Ⅱ
mod	Luyan 888	Modern cultivar	2011-2020	China (Anhui)	Ⅱ
mod	Qianmai 088	Modern cultivar	2011-2020	China (Jiangsu)	Ⅲ
mod	Ruihua 549	Modern cultivar	2011-2020	China (Jiangsu)	Ⅲ
mod	Zhongyanmai 0709	Modern cultivar	2011-2020	China (Jiangsu)	Ⅲ
mod	Chuanmai 1532	Modern cultivar	2011-2020	China (Sichuan)	Ⅳ
mod	Yimai 2	Modern cultivar	2011-2020	China (Shaanxi)	Ⅰ
mod	Wanxinmai 05012	Modern cultivar	2011-2020	China (Anhui)	Ⅱ
mod	Xumai 35	Modern cultivar	2011-2020	China (Jiangsu)	Ⅲ
mod	Anke 1405	Modern cultivar	2011-2020	China (Anhui)	Ⅱ
mod	Ningzimai 1	Modern cultivar	2011-2020	China (Jiangsu)	Ⅲ
mod	Zhenmai 13	Modern cultivar	2011-2020	China (Jiangsu)	Ⅲ
mod	Zhenmai 10	Modern cultivar	2011-2020	China (Jiangsu)	Ⅲ
mod	Taimai 901	Modern cultivar	2011-2020	China (Jiangsu)	Ⅲ
mod	Nongmai 156	Modern cultivar	2011-2020	China (Jiangsu)	Ⅲ
mod	Zhenmai 15	Modern cultivar	2011-2020	China (Jiangsu)	Ⅲ
mod	Zhenmai 11	Modern cultivar	2011-2020	China (Jiangsu)	Ⅲ
mod	Wanximai 0638	Modern cultivar	2011-2020	China (Anhui)	Ⅱ
mod	Nongmai 88	Modern cultivar	2011-2020	China (Jiangsu)	Ⅲ
mod	Zhenmai 18	Modern cultivar	2011-2020	China (Jiangsu)	Ⅲ
mod	Ningmai 26	Modern cultivar	2011-2020	China (Jiangsu)	Ⅲ
mod	Ruihuamai 566	Modern cultivar	2011-2020	China (Jiangsu)	Ⅲ
mod	Ningmai 33	Modern cultivar	2011-2020	China (Jiangsu)	Ⅲ
mod	Zhenmai 19	Modern cultivar	2011-2020	China (Jiangsu)	Ⅲ
mod	Ningmaizi 166	Modern cultivar	2011-2020	China (Jiangsu)	Ⅲ
mod	Huamai 1369	Modern cultivar	2011-2020	China (Hubei)	Ⅲ
mod	Yangfumai 12	Modern cultivar	2011-2020	China (Jiangsu)	Ⅲ
mod	Jinfengmai 1	Modern cultivar	2011-2020	China (Jiangsu)	Ⅲ
mod	Yangfumai 15	Modern cultivar	2011-2020	China (Jiangsu)	Ⅲ
mod	Yangfumai 7	Modern cultivar	2011-2020	China (Jiangsu)	Ⅲ
mod	Ningmaizi 518	Modern cultivar	2011-2020	China (Jiangsu)	Ⅲ
mod	Zhenmai 12	Modern cultivar	2011-2020	China (Jiangsu)	Ⅲ
mod	Yangfumai 8	Modern cultivar	2011-2020	China (Jiangsu)	Ⅲ
mod	Shumai 830	Modern cultivar	2011-2020	China (Sichuan)	Ⅳ
mod	Chuanyu 31	Modern cultivar	2011-2020	China (Sichuan)	Ⅳ
mod	Chuanyu 35	Modern cultivar	2011-2020	China (Sichuan)	Ⅳ
mod	Mianmai 902	Modern cultivar	2011-2020	China (Sichuan)	Ⅳ
mod	Emai 170 (G027)	Modern cultivar	2011-2020	China (Henan)	Ⅱ
mod	Hanmai 4	Modern cultivar	2011-2020	China (Hebei)	Ⅰ
mod	Luo 6010 (Shengqu 2011A3)	Modern cultivar	2011-2020	China (Hubei)	Ⅲ
mod	Mianmai 47	Modern cultivar	2011-2020	China (Sichuan)	Ⅳ
mod	Jiamai 208	Modern cultivar	2011-2020	China (Henan)	Ⅱ
mod	Anke 157	Modern cultivar	2011-2020	China (Anhui)	Ⅱ
mod	2016-17 Shengqu-997	Modern cultivar	2011-2020	China (Hubei)	Ⅲ
mod	Guomai 1217	Modern cultivar	2011-2020	China (Henan)	Ⅱ
mod	Guomai 606	Modern cultivar	2011-2020	China (Anhui)	Ⅱ
mod	Zhongmai 7152	Modern cultivar	2011-2020	China (Anhui)	Ⅱ
mod	Zhongmai 170	Modern cultivar	2011-2020	China (Shaanxi)	Ⅰ
mod	Shan 019	Modern cultivar	2011-2020	China (Shaanxi)	Ⅰ
mod	Pubing 326	Modern cultivar	2011-2020	China (Shaanxi)	Ⅰ
mod	Luo A112	Modern cultivar	2011-2020	China (Henan)	Ⅱ
mod	Xiaoyan 461	Modern cultivar	2011-2020	China (Shaanxi)	Ⅰ
mod	Luo A101	Modern cultivar	2011-2020	China (Henan)	Ⅱ
mod	Xiaoyan 327	Modern cultivar	2011-2020	China (Shaanxi)	Ⅰ
mod	Linyou 8068	Modern cultivar	2011-2020	China (Shanxi)	Ⅱ
mod	Anke 0817	Modern cultivar	2011-2020	China (Anhui)	Ⅱ
mod	Xiaoyan 986	Modern cultivar	2011-2020	China (Shaanxi)	Ⅰ
mod	Yikemai 0732	Modern cultivar	2011-2020	China (Anhui)	Ⅱ
mod	Ruihuamai 523	Modern cultivar	2011-2020	China (Jiangsu)	Ⅲ
mod	Xinong 658	Modern cultivar	2011-2020	China (Shaanxi)	Ⅰ
mod	An 0817	Modern cultivar	2011-2020	China (Anhui)	Ⅱ
mod	Fengdecunmai 24	Modern cultivar	2011-2020	China (Henan)	Ⅱ
mod	Nongda 2011	Modern cultivar	2011-2020	China (Henan)	Ⅱ
mod	Yuanfeng 8	Modern cultivar	2011-2020	China (Henan)	Ⅱ
mod	Lunxuan 166	Modern cultivar	2011-2020	China (Beijing)	Ⅰ
mod	Quanmai 31	Modern cultivar	2011-2020	China (Henan)	Ⅱ
mod	Saidemai 8	Modern cultivar	2011-2020	China (Henan)	Ⅱ
mod	Huamai 1028	Modern cultivar	2011-2020	China (Jiangsu)	Ⅲ
mod	Hua 1168 (2014B2)	Modern cultivar	2011-2020	China (Hubei)	Ⅲ
mod	Zhongzhimai 9	Modern cultivar	2011-2020	China (Qinghai)	Ⅷ
mod	Guohong 3	Modern cultivar	2011-2020	China (Anhui)	Ⅱ
mod	Xiangmai 75-2016 Shengqu A6 (Xiangmai 62)	Modern cultivar	2011-2020	China (Hubei)	Ⅲ
mod	Nongmai 126	Modern cultivar	2011-2020	China (Jiangsu)	Ⅲ
mod	Huaichuan 916	Modern cultivar	2011-2020	China (Henan)	Ⅱ
mod	Longmai 813	Modern cultivar	2011-2020	China (Shaanxi)	Ⅰ
mod	Xinong 100	Modern cultivar	2011-2020	China (Shaanxi)	Ⅰ
mod	818	Modern cultivar	2011-2020	China (Shaanxi)	Ⅰ
mod	Lunxuan 66	Modern cultivar	2011-2020	China (Henan)	Ⅱ
mod	Bainong 365	Modern cultivar	2011-2020	China (Henan)	Ⅱ
mod	Luomai 40	Modern cultivar	2011-2020	China (Henan)	Ⅱ
mod	Lantian 36	Modern cultivar	2011-2020	China (Gansu)	Ⅰ
mod	Yutianmai 119	Modern cultivar	2011-2020	China (Shandong)	Ⅱ
mod	Jinmai 101	Modern cultivar	2011-2020	China (Hebei)	Ⅰ
mod	Zhongmai 998	Modern cultivar	2011-2020	China (Hebei)	Ⅰ
mod	Shinong 958	Modern cultivar	2011-2020	China (Hebei)	Ⅰ
mod	Shimai 30	Modern cultivar	2011-2020	China (Hebei)	Ⅰ
mod	Yunhei 161	Modern cultivar	2011-2020	China (Hebei)	Ⅰ
mod	Heng H1603	Modern cultivar	2011-2020	China (Hebei)	Ⅰ
mod	Hengmai 27 (Heng H144019)	Modern cultivar	2011-2020	China (Hebei)	Ⅰ
mod	Nongda 5133	Modern cultivar	2011-2020	China (Hebei)	Ⅰ
mod	Zhongxinmai 68	Modern cultivar	2011-2020	China (Hebei)	Ⅰ
mod	Luofeng 168	Modern cultivar	2011-2020	China (Henan)	Ⅱ
mod	Caiyuan 2	Modern cultivar	2011-2020	China (Henan)	Ⅱ
mod	Quanmai 890	Modern cultivar	2011-2020	China (Henan)	Ⅱ
mod	Saidemai 1	Modern cultivar	2011-2020	China (Henan)	Ⅱ
mod	Anmai 1132	Modern cultivar	2011-2020	China (Henan)	Ⅱ
mod	Yangjiangmai 586	Modern cultivar	2011-2020	China (Jiangsu)	Ⅲ
mod	Ruihuamai 520	Modern cultivar	2011-2020	China (Jiangsu)	Ⅲ
mod	Yangguang 851	Modern cultivar	2011-2020	China (Henan)	Ⅱ
mod	Shan 319	Modern cultivar	2011-2020	China (Shaanxi)	Ⅰ
mod	Yunhan 125	Modern cultivar	2011-2020	China (Shanxi)	Ⅱ
mod	Fengmai 1	Modern cultivar	2011-2020	China (Jiangsu)	Ⅲ
mod	Zimai 8555	Modern cultivar	2011-2020	China (Shanxi)	Ⅱ
mod	Chang 5553	Modern cultivar	2011-2020	China (Shanxi)	Ⅱ
mod	Jiushenghe D606	Modern cultivar	2011-2020	China (Xinjiang)	Ⅹ
mod	Pinyu 8155	Modern cultivar	2011-2020	China (Shanxi)	Ⅱ
mod	Tai 113	Modern cultivar	2011-2020	China (Shanxi)	Ⅱ
mod	Weilong 121	Modern cultivar	2011-2020	China (Shaanxi)	Ⅰ
mod	Xinong 977	Modern cultivar	2011-2020	China (Shaanxi)	Ⅰ
mod	Xinnong 518	Modern cultivar	2011-2020	China (Anhui)	Ⅱ
mod	Xumai 33	Modern cultivar	2011-2020	China (Jiangsu)	Ⅲ
mod	Zhongmai 886	Modern cultivar	2011-2020	China (Beijing)	Ⅰ
mod	Huaimai 47	Modern cultivar	2011-2020	China (Jiangsu)	Ⅲ
mod	Huamai 118	Modern cultivar	2011-2020	China (Jiangsu)	Ⅲ
mod	Huaimai 49	Modern cultivar	2011-2020	China (Jiangsu)	Ⅲ
mod	Huaimai 48	Modern cultivar	2011-2020	China (Jiangsu)	Ⅲ
mod	Ningmaizi 958	Modern cultivar	2011-2020	China (Jiangsu)	Ⅲ
mod	Yanmai 1	Modern cultivar	2011-2020	China (Jiangsu)	Ⅲ
mod	Longmai 39	Modern cultivar	2011-2020	China (Jiangsu)	Ⅲ
mod	Yangfumai 11	Modern cultivar	2011-2020	China (Jiangsu)	Ⅲ
mod	Shannong 34	Modern cultivar	2011-2020	China (Shandong)	Ⅱ
mod	Nanmai 660	Modern cultivar	2011-2020	China (Sichuan)	Ⅳ
mod	Guohaomai 3	Modern cultivar	2011-2020	China (Sichuan)	Ⅳ
mod	Qianmai 21	Modern cultivar	2011-2020	China (Sichuan)	Ⅳ
mod	Qianmai 22	Modern cultivar	2011-2020	Chian (Guizhou)	Ⅳ
mod	Mianmai 907	Modern cultivar	2011-2020	China (Sichuan)	Ⅳ
mod	Chuanyu 27	Modern cultivar	2011-2020	China (Sichuan)	Ⅳ
mod	Yumai 13	Modern cultivar	2011-2020	China (Sichuan)	Ⅳ
mod	Chuanyu 29	Modern cultivar	2011-2020	China (Sichuan)	Ⅳ
mod	Mianmai 827	Modern cultivar	2011-2020	China (Sichuan)	Ⅳ
mod	Shumai 114	Modern cultivar	2011-2020	China (Sichuan)	Ⅳ
mod	Luyuan 118	Modern cultivar	2011-2020	China (Shandong)	Ⅱ
mod	Jimai 60	Modern cultivar	2011-2020	China (Shandong)	Ⅱ
mod	Jimai 106	Modern cultivar	2011-2020	China (Shandong)	Ⅱ
mod	Huacheng 3366	Modern cultivar	2011-2020	China (Anhui)	Ⅱ
mod	Ke 966	Modern cultivar	2011-2020	China (Hebei)	Ⅰ
mod	Xinong 20	Modern cultivar	2011-2020	China (Shaanxi)	Ⅰ
mod	Taitianmai 118	Modern cultivar	2011-2020	China (Shandong)	Ⅱ
mod	Xingmai 7 (Xing 05-1241)	Modern cultivar	2011-2020	China (Hebei)	Ⅰ
mod	Xinmai 23	Modern cultivar	2011-2020	China (Henan)	Ⅱ
mod	Xinong 585	Modern cultivar	2011-2020	China (Shaanxi)	Ⅰ
mod	Weimai 9	Modern cultivar	2011-2020	China (Shaanxi)	Ⅰ
mod	Hanmai 728	Modern cultivar	2011-2020	China (Shaanxi)	Ⅰ
mod	Jinmai 92	Modern cultivar	2011-2020	China (Shanxi)	Ⅱ
mod	Zhongmai 6079	Modern cultivar	2011-2020	China (Beijing)	Ⅰ
mod	3753-6	Modern cultivar	2011-2020	China (Beijing)	Ⅰ
lan	Hengmai 30 (Heng 7001)	Modern cultivar	post-2021	China (Hebei)	Ⅰ
lan	Hengmai 29 (Heng H165171)	Modern cultivar	post-2021	China (Hebei)	Ⅰ
lan	Yongyoumai 8838	Modern cultivar	post-2021	China (Henan)	Ⅱ
lan	Luomai 40	Modern cultivar	post-2021	China (Henan)	Ⅱ
lan	Huachangmai 26	Modern cultivar	post-2021	China (Henan)	Ⅱ
lan	Xingmai 20	Modern cultivar	post-2021	China (Hebei)	Ⅰ
lan	Xiangmai 518 (Chang 5804)	Modern cultivar	post-2021	China (Shanxi)	Ⅱ
lan	Jinmai 108	Modern cultivar	post-2021	China (Shanxi)	Ⅱ
lan	Shengmai 5	Modern cultivar	post-2021	China (Shandong)	Ⅱ
lan	Han 11-5278 (Hanmai 20)	Modern cultivar	post-2021	China (Hebei)	Ⅰ
mod	Zhengmai 1835	Modern cultivar	post-2021	China (Henan)	Ⅱ
mod	Zhengmai 0989	Modern cultivar	post-2021	China (Henan)	Ⅱ
mod	Zhengmai 5135	Modern cultivar	post-2021	China (Henan)	Ⅱ
mod	Wanmai 1326	Modern cultivar	post-2021	China (Henan)	Ⅱ
mod	Zhaofeng 18	Modern cultivar	post-2021	China (Henan)	Ⅱ
mod	Anmai 13	Modern cultivar	post-2021	China (Henan)	Ⅱ
mod	Changmai 21	Modern cultivar	post-2021	China (Henan)	Ⅱ
mod	Yunong 903	Modern cultivar	post-2021	China (Henan)	Ⅱ
mod	Kaimai 1606	Modern cultivar	post-2021	China (Henan)	Ⅱ
mod	Luomai 116	Modern cultivar	post-2021	China (Henan)	Ⅱ
mod	Luohan 30	Modern cultivar	post-2021	China (Henan)	Ⅱ
mod	Yunong 904	Modern cultivar	post-2021	China (Henan)	Ⅱ
mod	Luomai 39	Modern cultivar	post-2021	China (Henan)	Ⅱ
mod	Tianmin 118	Modern cultivar	post-2021	China (Henan)	Ⅱ
mod	Xinxuan 979	Modern cultivar	post-2021	China (Henan)	Ⅱ
mod	Xumai 1706	Modern cultivar	post-2021	China (Henan)	Ⅱ
mod	Fengyunmai 5	Modern cultivar	post-2021	China (Henan)	Ⅱ
mod	Fenghuang 619	Modern cultivar	post-2021	China (Henan)	Ⅱ
mod	Bainong 1316	Modern cultivar	post-2021	China (Henan)	Ⅱ
mod	Zhengmai 16	Modern cultivar	post-2021	China (Henan)	Ⅱ
mod	Xinzhi 9	Modern cultivar	post-2021	China (Henan)	Ⅱ
mod	Chunxiao 186	Modern cultivar	post-2021	China (Henan)	Ⅱ
mod	Yangguang 728	Modern cultivar	post-2021	China (Henan)	Ⅱ
mod	Dehong Fumai 11	Modern cultivar	post-2021	China (Henan)	Ⅱ
mod	Puxing 10	Modern cultivar	post-2021	China (Henan)	Ⅱ
mod	Anke 1701	Modern cultivar	post-2021	China (Anhui)	Ⅱ
mod	Huacheng 3077	Modern cultivar	post-2021	China (Anhui)	Ⅱ
mod	Baoliang 5	Modern cultivar	post-2021	China (Henan)	Ⅱ
mod	Keda 1026	Modern cultivar	post-2021	China (Henan)	Ⅱ
mod	Lantian 43	Modern cultivar	post-2021	China (Gansu)	Ⅰ
mod	Xinong 116	Modern cultivar	post-2021	China (Shaanxi)	Ⅰ
mod	Lunxuan 49	Modern cultivar	post-2021	China (Hebei)	Ⅰ
mod	Longyuan 235	Modern cultivar	post-2021	China (Gansu)	Ⅰ
mod	Weimai 10	Modern cultivar	post-2021	China (Shaanxi)	Ⅰ
mod	Malan 6	Modern cultivar	post-2021	China (Hebei)	Ⅰ
mod	Hengmai 28 (Heng H155115)	Modern cultivar	post-2021	China (Hebei)	Ⅰ
mod	Shengcaimai 2	Modern cultivar	post-2021	China (Henan)	Ⅱ
mod	Pinyu 8172	Modern cultivar	post-2021	China (Shanxi)	Ⅱ
mod	Longmai 671	Modern cultivar	post-2021	China (Gansu)	Ⅰ
mod	Pinyu 8173	Modern cultivar	post-2021	China (Shanxi)	Ⅱ
mod	Chang 7170	Modern cultivar	post-2021	China (Shanxi)	Ⅱ
lan	Hongmangmai	Landrace	/	China (Gansu)	Ⅰ
lan	Honglidangnianlao	Landrace	/	China (Shaanxi)	Ⅰ
lan	Songjiangfengjingyezihuang37	Landrace	/	China (Shanghai)	Ⅲ
lan	Hanzhongbai	Landrace	/	China (Shaanxi)	Ⅰ
mod	Xiaoyuhua	Landrace	/	China (Jiangsu)	Ⅲ
lan	Tuhulutou	Landrace	/	China (Jiangsu)	Ⅲ
lan	Huangtangmai	Landrace	/	China (Jiangsu)	Ⅲ
lan	Jiangxizao	Landrace	/	China (Jiangxi)	Ⅲ
lan	Huoshaomai	Landrace	/	China (Yunnan)	Ⅳ
lan	Tumangmai	Landrace	/	China (Shaanxi)	Ⅰ
mod	Hongmangzi	Landrace	/	China (Hubei)	Ⅲ
lan	Huangshuibai	Landrace	/	China (Zhejiang)	Ⅲ
lan	Zaoxiaomai	Landrace	/	China (Zhejiang)	Ⅲ
lan	Xiaofoshou	Landrace	/	China (Henan)	Ⅱ
lan	Fanshanxiaomai	Landrace	/	China (Jiangsu)	Ⅲ
mod	Songyanghongmai	Landrace	/	China (Hebei)	Ⅰ
mod	Hongdongmai	Landrace	/	China (Xinjiang)	Ⅹ
mod	Shanxibaimai	Landrace	/	China (Shaanxi)	Ⅰ
lan	Liuzhutou	Landrace	/	China (Jiangsu)	Ⅲ
lan	Yezihuang37	Landrace	/	China (Shanghai)	Ⅲ
lan	Hongjinbaoyin	Landrace	/	China (Xinjiang)	Ⅹ
mod	Songjiangfengjingyezihuang16	Landrace	/	China (Shanghai)	Ⅲ
lan	Mangxiaomai	Landrace	/	China (Jiangsu)	Ⅲ
mod	Yangmai	Landrace	/	China (Zhejiang)	Ⅲ
lan	Dayuhua	Landrace	/	China (Jiangsu)	Ⅲ
lan	Heshangmai	Landrace	/	China (Hunan)	Ⅲ
mod	Wuzhuamai	Landrace	/	China (Anhui)	Ⅱ
lan	Zaowutian	Landrace	/	China (Jiangsu)	Ⅲ
lan	Jiahongmai	Landrace	/	China (Shanxi)	Ⅱ
lan	Maoyingafu	Landrace	/	China (Jiangsu)	Ⅲ
lan	Laolaixia	Landrace	/	China (Shandong)	Ⅱ
lan	Honggoudou	Landrace	/	China (Henan)	Ⅱ
lan	Jianmai	Landrace	/	China (Henan)	Ⅱ
lan	Hongtuzi	Landrace	/	China (Ningxia)	Ⅷ
lan	Honghuazao	Landrace	/	China (Jiangsu)	Ⅲ
lan	Wenzhouhongheshang	Landrace	/	China (Zhejiang)	Ⅲ
lan	Putongxiaomai	Landrace	/	China (Shanghai)	Ⅲ
lan	Youmangxiaomai	Landrace	/	China (Jiangsu)	Ⅲ
lan	Huangcandou	Landrace	/	China (Jiangsu)	Ⅲ
lan	Jinhuangmai	Landrace	/	China (Gansu)	Ⅰ
mod	Dalibanmang	Landrace	/	China (Shandong)	Ⅱ
lan	Hongjinbaoyin	Landrace	/	China (Xinjiang)	Ⅹ
lan	Youmanggedacao	Landrace	/	China (Henan)	Ⅱ
lan	Xiaozibai	Landrace	/	China (Henan)	Ⅱ
lan	Huangguaxian	Landrace	/	China (Henan)	Ⅱ
mod	Shuanghoumai	Landrace	/	China (Henan)	Ⅱ
lan	Quermang	Landrace	/	China (Henan)	Ⅱ
lan	Nanyanghong	Landrace	/	China (Henan)	Ⅱ
mod	Baoshibamai	Landrace	/	China (Henan)	Ⅱ
lan	Ermangmai	Landrace	/	China (Henan)	Ⅱ
lan	Yulincao	Landrace	/	China (Henan)	Ⅱ
lan	Banjiemang	Landrace	/	China (Henan)	Ⅱ
lan	Duanganzhuganqing	Landrace	/	China (Henan)	Ⅱ
lan	Laohongmai	Landrace	/	China (Henan)	Ⅱ
mod	Daizimai	Landrace	/	China (Henan)	Ⅱ
lan	Xiaofoshou	Landrace	/	China (Henan)	Ⅱ
lan	Zigancao	Landrace	/	China (Henan)	Ⅱ
lan	Baimai	Landrace	/	China (Henan)	Ⅱ
lan	Youzimai	Landrace	/	China (Henan)	Ⅱ
lan	Youzimai	Landrace	/	China (Henan)	Ⅱ
lan	Chushanbao	Landrace	/	China (Henan)	Ⅱ
lan	LiuOer	Landrace	/	China (Henan)	Ⅱ
lan	Baimangcao	Landrace	/	China (Henan)	Ⅱ
lan	Jinzihong	Landrace	/	China (Henan)	Ⅱ
lan	Qiuzimai	Landrace	/	China (Henan)	Ⅱ
lan	Fangtoumai	Landrace	/	China (Henan)	Ⅱ
lan	Yixiaomai	Landrace	/	China (Henan)	Ⅱ
lan	Hongqulianmang	Landrace	/	China (Henan)	Ⅱ
lan	Youzitou	Landrace	/	China (Henan)	Ⅱ
lan	Baodijiang	Landrace	/	China (Henan)	Ⅱ
lan	Honggoudou	Landrace	/	China (Henan)	Ⅱ
lan	Yingsizhuang	Landrace	/	China (Henan)	Ⅱ
lan	Hongcantiao	Landrace	/	China (Henan)	Ⅱ
lan	Baihulu	Landrace	/	China (Henan)	Ⅱ
lan	Zaobanyue	Landrace	/	China (Henan)	Ⅱ
lan	Damai	Landrace	/	China (Henan)	Ⅱ
lan	Youmangsaogudan	Landrace	/	China (Henan)	Ⅱ
lan	Ermangmai	Landrace	/	China (Henan)	Ⅱ
lan	Zigancao	Landrace	/	China (Henan)	Ⅱ
lan	Duanermang	Landrace	/	China (Henan)	Ⅱ
lan	Hulutou	Landrace	/	China (Henan)	Ⅱ
lan	Zaosantian	Landrace	/	China (Henan)	Ⅱ
lan	Pushanba	Landrace	/	China (Henan)	Ⅱ
lan	Hongsuihong	Landrace	/	China (Henan)	Ⅱ
lan	Dazicao	Landrace	/	China (Henan)	Ⅱ
lan	Changzicao	Landrace	/	China (Henan)	Ⅱ
lan	Youzimai	Landrace	/	China (Henan)	Ⅱ
lan	Youmai	Landrace	/	China (Henan)	Ⅱ
lan	Liangguangtou	Landrace	/	China (Henan)	Ⅱ
lan	Dazihong	Landrace	/	China (Henan)	Ⅱ
lan	Cantiaomai	Landrace	/	China (Henan)	Ⅱ
lan	Huaiqingfumai	Landrace	/	China (Henan)	Ⅱ
lan	Baifumai	Landrace	/	China (Henan)	Ⅱ
lan	Baiyupi	Landrace	/	China (Henan)	Ⅱ
lan	Yangmai	Landrace	/	China (Henan)	Ⅱ
lan	Yingsizhuang	Landrace	/	China (Henan)	Ⅱ
mod	Zhuganqing	Landrace	/	China (Henan)	Ⅱ
lan	Baimai	Landrace	/	China (Henan)	Ⅱ
lan	Shiganmai	Landrace	/	China (Henan)	Ⅱ
lan	Ziganbaimangxian	Landrace	/	China (Henan)	Ⅱ
lan	Hongmai	Landrace	/	China (Henan)	Ⅱ
lan	Zaobanyue	Landrace	/	China (Henan)	Ⅱ
lan	Hongsuimai	Landrace	/	China (Henan)	Ⅱ
lan	Baimanghong	Landrace	/	China (Henan)	Ⅱ
lan	Sanyuehuang	Landrace	/	China (Henan)	Ⅱ
lan	Huisanbao	Landrace	/	China (Henan)	Ⅱ
lan	Sanbaoxian	Landrace	/	China (Henan)	Ⅱ
lan	Datouben	Landrace	/	China (Henan)	Ⅱ
lan	Baimanghong	Landrace	/	China (Henan)	Ⅱ
lan	Sanbaimai	Landrace	/	China (Henan)	Ⅱ
lan	Hongmanghong	Landrace	/	China (Henan)	Ⅱ
mod	Jiutouniao	Landrace	/	China (Henan)	Ⅱ
lan	Hongmangcao	Landrace	/	China (Henan)	Ⅱ
lan	Huolibeng	Landrace	/	China (Henan)	Ⅱ
lan	Baihulutou	Landrace	/	China (Henan)	Ⅱ
lan	Fanglutou	Landrace	/	China (Henan)	Ⅱ
lan	Dawangshuibai	Landrace	/	China (Henan)	Ⅱ
lan	Manmai	Landrace	/	China (Henan)	Ⅱ
lan	Datouben	Landrace	/	China (Henan)	Ⅱ
lan	Baiyintiao	Landrace	/	China (Henan)	Ⅱ
lan	Dakoumai	Landrace	/	China (Henan)	Ⅱ
lan	Erjimai	Landrace	/	China (Henan)	Ⅱ
lan	Hongmanghongmai	Landrace	/	China (Henan)	Ⅱ
lan	Baitutou	Landrace	/	China (Henan)	Ⅱ
lan	Wangshanbai	Landrace	/	China (Henan)	Ⅱ
mod	Foshoumai	Landrace	/	China (Henan)	Ⅱ
lan	Dazicao	Landrace	/	China (Henan)	Ⅱ
lan	Hongheshangtou	Landrace	/	China (Henan)	Ⅱ
lan	Wuhuatou	Landrace	/	China (Henan)	Ⅱ
mod	Dongmai	Landrace	/	China (Henan)	Ⅱ
lan	Baishenmai	Landrace	/	China (Henan)	Ⅱ
lan	Quanmangmai	Landrace	/	China (Henan)	Ⅱ
lan	Mala	Landrace	/	China (Henan)	Ⅱ
lan	Dazibai	Landrace	/	China (Henan)	Ⅱ
lan	Ermangmai	Landrace	/	China (Henan)	Ⅱ
mod	Jinsita	Landrace	/	China (Henan)	Ⅱ
lan	Hongjianmai	Landrace	/	China (Henan)	Ⅱ
lan	Baimangcao	Landrace	/	China (Henan)	Ⅱ
lan	Shuilaomai	Landrace	/	China (Henan)	Ⅱ
lan	Shandatou	Landrace	/	China (Henan)	Ⅱ
lan	Yingsizhuang	Landrace	/	China (Henan)	Ⅱ
lan	Jianmai	Landrace	/	China (Henan)	Ⅱ
lan	Nvmai	Landrace	/	China (Henan)	Ⅱ
lan	Kumai	Landrace	/	China (Henan)	Ⅱ
lan	Guangtoumai	Landrace	/	China (Henan)	Ⅱ
lan	Baiheshangtou	Landrace	/	China (Henan)	Ⅱ
mod	Wuzitoumai	Landrace	/	China (Henan)	Ⅱ
lan	Yubianmai	Landrace	/	China (Henan)	Ⅱ
lan	Duanganzhaoxiaomai	Landrace	/	China (Henan)	Ⅱ
lan	Dazihong	Landrace	/	China (Henan)	Ⅱ
lan	Heloubai	Landrace	/	China (Henan)	Ⅱ
lan	Baiquanmang	Landrace	/	China (Henan)	Ⅱ
lan	Pushanbamai	Landrace	/	China (Henan)	Ⅱ
lan	Zhaoziya	Landrace	/	China (Henan)	Ⅱ
lan	Baizhamang	Landrace	/	China (Henan)	Ⅱ
lan	Deguohong	Landrace	/	China (Henan)	Ⅱ
lan	Jianmai	Landrace	/	China (Henan)	Ⅱ
lan	Zhilemai	Landrace	/	China (Henan)	Ⅱ
lan	Siyuecao	Landrace	/	China (Henan)	Ⅱ
lan	Baimanghong	Landrace	/	China (Henan)	Ⅱ
mod	Hunanbai	Landrace	/	China (Henan)	Ⅱ
lan	Ermangmai	Landrace	/	China (Henan)	Ⅱ
lan	Xiaohongmang	Landrace	/	China (Henan)	Ⅱ
lan	Jinguoyin	Landrace	/	China (Henan)	Ⅱ
lan	Baiyouzitou	Landrace	/	China (Henan)	Ⅱ
mod	Tiegancao	Landrace	/	China (Henan)	Ⅱ
lan	Xianmai	Landrace	/	China (Henan)	Ⅱ
lan	Baigedatou	Landrace	/	China (Henan)	Ⅱ
lan	Hongyouzitou	Landrace	/	China (Henan)	Ⅱ
lan	Kumai	Landrace	/	China (Henan)	Ⅱ
lan	Xiaoguangtou	Landrace	/	China (Henan)	Ⅱ
lan	Hongmangbaimai	Landrace	/	China (Henan)	Ⅱ
lan	Bensiyuehuang	Landrace	/	China (Henan)	Ⅱ
lan	Pingyuan 50	Landrace	/	China (Henan)	Ⅱ
lan	Heshangtou	Landrace	/	China (Henan)	Ⅱ
lan	Yududasuibai	Landrace	/	China (Henan)	Ⅱ
lan	Hongheshangtou	Landrace	/	China (Henan)	Ⅱ
