# Supplementary material
Source: Research Square preprint supplement (doi:10.21203/rs.3.rs-9009137/v1)
Supplement: Supplementary file 3 [file 3b0491261c4410220e5d0be2.xlsx]

## Sheet: Supplementary Data 4
Supplementary Data 4. Information of accessions used in genotyping of 15 significant sites and varieties name.
Variety Name		AX-108957362	AX-94423107	AX-111715806	AX-95225571	AX-108770720	AX-111660589	AX-94847672	AX-110584241	AX-94449995	AX-109029004	AX-109038395	AX-94679893	AX-94449995	AX-111617345	AX-110071841
		T/C	T/C	T/G	T/C	T/C	A/G	A/C	T/C	T/C	T/C	A/G	T/C	T/C	A/G	A/G
Zhengmai 07H508	NUE1	TT	CC	GG	TT	TT	AA	AC	TT	TC	NN	AA	TC	TC	AA	AA
R93127	NUE2	TT	CC	GG	TT	CC	AG	AC	TT	TC	CC	GG	TC	TC	AA	AA
Jichuang 2	NUE3	TT	CC	GG	TC	TT	AG	AA	CC	TC	NN	GG	CC	TC	AA	AA
Aikang 58	NUE4	TT	CC	NN	TT	TC	AG	AC	TT	TC	CC	AA	TC	TC	AA	AA
Zhou 8425B	NUE5	TT	CC	GG	TT	CC	AA	AC	TT	TC	CC	AA	TC	TC	GG	GG
Zhoumai 16	NUE6	TT	CC	GG	TT	TT	AA	AC	TT	TC	CC	AA	TC	TC	AA	AA
Zhengmai 366	NUE7	TT	CC	GG	TT	TT	AG	AA	CC	TC	CC	GG	CC	TC	NN	AA
Yumai 21	NUE8	TT	CC	GG	TT	TT	AA	AC	TT	TC	CC	GG	TC	TC	NN	AA
Aifeng 3	NUE9	TT	CC	GG	TT	CC	NN	AA	CC	TC	CC	AA	CC	TC	AA	AA
Zhengmai 9405	NUE10	TT	CC	GG	TT	CC	AG	CC	TT	TC	CC	AA	CC	TC	AA	AA
Zhongmai 895	NUE11	TC	CC	GG	TT	TT	AA	AC	TT	TC	CC	AA	TC	TC	AA	AA
Luomai 1	NUE12	TT	CC	GG	TT	TC	AA	NN	TT	TC	CC	GG	TC	TC	AA	AA
Zhengmai 5138	NUE13	TT	CC	GG	TT	TT	GG	AC	TT	TT	CC	AA	TC	TT	AA	AA
Bainong 207	NUE14	TT	CC	GG	TT	TT	AG	AA	TT	TC	CC	AA	CC	TC	AA	AA
Zhengmai 0943	NUE15	TT	CC	GG	TT	CC	AA	AC	TT	TC	CC	AA	TC	TC	AA	AA
Zhoumai 32	NUE16	TT	CC	GG	TT	TT	AA	AC	TT	TC	CC	AA	TC	TC	NN	AA
Zhengzhou 761	NUE17	TC	CC	GG	TT	CC	AA	CC	TT	TC	CC	GG	CC	TC	AG	AA
Xinmai 26-5	NUE18	TC	CC	GG	TT	TC	AG	AA	CC	TC	CC	GG	CC	TC	AA	AA
Yumai 69	NUE19	TT	CC	GG	TT	TT	AA	AA	CC	TC	CC	AA	CC	TC	AA	AA
Yumai 18	NUE20	TC	CC	GG	TT	TC	AA	AA	TT	TC	TC	GG	CC	TC	AG	AA
Cunmai 5	NUE21	TT	CC	TG	TT	TT	AG	AA	CC	TC	CC	GG	CC	TC	AA	AA
4B269	NUE22	TT	CC	GG	TT	TT	AG	AC	TT	TC	NN	AA	TC	TC	AA	AA
Cunmai 8	NUE23	TT	CC	GG	TT	TT	AA	AC	TT	TC	CC	AA	TC	TC	AG	AA
Zhongyu 3	NUE24	TT	CC	GG	TT	TT	AA	AC	TT	TC	CC	AA	TC	TC	NN	AA
Huapei 3	NUE25	TT	CC	GG	TC	TT	AG	AC	TT	TC	CC	GG	TC	TC	AG	AA
Fengdecunmai 1	NUE26	TT	CC	GG	TT	TT	AG	AC	TT	TC	CC	AA	TC	TC	AA	AA
Xinmai 30	NUE27	TT	CC	GG	TT	TT	AG	AA	TT	TC	CC	AA	CC	TC	NN	AA
Yumai 49	NUE28	TT	CC	GG	TT	TT	AG	CC	TT	TC	CC	GG	CC	TC	NN	AA
Zhengmai 1354	NUE29	TT	CC	GG	TT	TT	AA	AC	TT	TC	NN	AA	TC	TC	AA	AA
Zhongmai 875	NUE30	TT	CC	GG	TT	TT	AA	AA	TT	CC	NN	AA	CC	CC	AA	AA
Zhengmai 9023	NUE31	TT	CC	GG	TT	TC	AA	AA	CC	TC	TC	GG	CC	TC	NN	AA
Zhongyu 9307	NUE32	TT	CC	GG	TT	TT	AA	AC	TT	TC	CC	AA	NN	TC	AG	AA
Zhengmai 0856	NUE33	TT	CC	GG	TT	TT	AG	AC	TT	TC	CC	AA	TC	TC	AA	AA
Yumai 19	NUE34	TT	CC	GG	TT	TT	AG	AC	TT	CC	CC	GG	TC	CC	AA	AA
Zhoumai 18	NUE35	TT	CC	GG	TT	TC	AA	AC	TT	TC	CC	GG	TC	TC	NN	AA
Yumai 63	NUE36	TC	CC	GG	TT	CC	AA	AA	TT	TC	CC	GG	CC	TC	AA	AA
Xinong 979	NUE37	TT	CC	GG	TT	CC	AA	AA	CC	TC	NN	AA	CC	TC	AA	AA
Xinmai 16	NUE38	TT	CC	GG	TT	CC	AG	AA	TT	TC	CC	NN	CC	TC	AA	AA
Yumai 13	NUE39	TT	CC	GG	TT	CC	AG	AC	TT	TC	CC	NN	TC	TC	AG	AA
Yumai 51	NUE40	TT	CC	GG	TT	TC	NN	AC	TT	TC	CC	GG	TC	TC	AA	AA
Zhongyu 1220	NUE41	TT	CC	GG	TT	TT	AA	AC	TT	TC	NN	AA	TC	TC	AA	AA
Xian 8	NUE42	TT	CC	GG	TT	CC	AA	CC	TT	TC	NN	GG	CC	TC	AG	AA
Zhengzhou 871	NUE43	TC	CC	GG	TT	CC	AA	AC	TT	TC	CC	GG	TC	TC	AA	AA
Luomai 24	NUE44	TC	CC	GG	TT	TT	AA	AC	TT	TC	CC	AA	TC	TC	AA	AA
Pumai 9	NUE45	TT	CC	GG	TT	TC	AA	AA	TT	TC	CC	GG	CC	TC	AA	AA
Zhengmai 7698	NUE46	TT	CC	GG	TT	TT	AG	AC	TT	TC	NN	AA	TC	TC	NN	AA
Baiquan 41	NUE47	TC	CC	GG	TT	TT	AA	AA	TT	TC	TC	GG	CC	TC	AA	AA
Bonong 6	NUE48	TT	CC	GG	TT	TC	AA	AA	CC	TC	CC	GG	CC	TC	AA	AA
Zhoumai 22	NUE49	TT	CC	NN	TT	TT	AG	AC	TT	TC	CC	AA	TC	TC	AA	AA
Xuke 168	NUE50	TT	CC	GG	TT	TC	AA	AC	TT	TC	CC	AA	TC	TC	GG	GG
Zheng 97199	NUE51	TT	CC	TG	TT	CC	AA	NN	TC	CC	CC	GG	TC	CC	AA	AG
Xuzhou 21	NUE52	TT	CC	GG	TT	CC	GG	CC	TT	TC	CC	GG	CC	TC	AA	AA
Zhengtaiyu 1	NUE53	TT	CC	GG	TT	CC	AG	AC	TT	TC	CC	GG	TC	TC	NN	AA
Yumai 43	NUE54	TT	CC	GG	TT	TC	AA	AA	TT	TC	CC	GG	TC	TC	AG	AA
Xiaoyan 4	NUE55	TC	CC	GG	TC	TT	AG	AA	CC	TC	CC	GG	CC	TC	AA	AA
Aimengniu	NUE56	TT	CC	GG	TT	TT	AA	AC	CC	TC	CC	AA	TC	TC	NN	AA
Anxuan 5	NUE57	TT	CC	TT	TT	TT	AA	AA	TT	CC	CC	GG	CC	CC	AA	AA
Xinmai 21	NUE58	TT	CC	GG	TT	TT	AG	AA	TT	TC	CC	GG	CC	TC	AA	AA
Yumai 56	NUE59	TT	CC	GG	TT	TC	AG	AA	CC	TC	CC	GG	CC	TC	AA	AA
Yumai 67	NUE60	TT	CC	GG	TT	CC	NN	AA	TT	TC	CC	GG	CC	TC	AA	AA
Yumai 2	NUE61	TT	CC	GG	TT	TT	AG	AA	TT	TC	CC	GG	CC	TC	AG	AA
Jimai 19	NUE62	TT	CC	GG	TT	TT	AA	AA	CC	TC	CC	GG	CC	TC	AA	AA
Jimai 30	NUE63	TT	CC	GG	TT	TT	AG	NN	TT	CC	NN	AA	TC	CC	AA	AA
Zhoumai 23	NUE64	TT	CC	GG	TT	TT	AA	AA	CC	TC	CC	AA	CC	TC	AA	AA
Zhengmai 379	NUE65	TT	CC	GG	TT	CC	AA	AC	TT	TC	CC	AA	TC	TC	NN	NN
Yumai 50	NUE66	TT	CC	GG	TT	CC	AA	AC	NN	CC	CC	NN	TC	CC	AA	AA
Xuke 1	NUE67	TT	CC	GG	TT	TT	AG	AC	TT	TC	CC	AA	TC	TC	AA	AA
Zhengyin 4	NUE68	TT	CC	GG	TT	CC	AA	CC	TT	TC	NN	GG	CC	TC	AG	AA
Xuke 316	NUE69	TT	CC	GG	TT	CC	AA	AC	TT	TC	NN	AG	TC	TC	GG	GG
Huapei 8	NUE70	TT	CC	GG	TC	CC	AA	CC	TT	TC	TC	GG	CC	TC	AA	AA
Yumai 61	NUE71	TT	CC	NN	TT	CC	AA	AC	TT	CC	CC	AA	TC	CC	AA	AA
Youmanggedacao	NUE72	TT	CC	TT	TT	CC	AA	AA	CC	CC	CC	GG	CC	CC	GG	GG
Xiaozibai	NUE73	TT	CC	TT	TT	CC	AA	AA	CC	CC	NN	GG	CC	CC	GG	GG
Huangguaxian	NUE74	TT	CC	TT	TT	CC	AA	AA	CC	CC	CC	GG	NN	CC	GG	GG
Shuanghoumai	NUE75	TT	CC	TT	TT	CC	AA	AA	CC	CC	NN	GG	CC	CC	GG	GG
Neixiang 36	NUE76	TT	CC	TT	TC	CC	AA	AA	CC	CC	CC	GG	CC	CC	NN	AA
Quermang	NUE77	TT	CC	TT	TT	CC	AA	AA	CC	CC	NN	GG	CC	CC	GG	GG
Nanyanghong	NUE78	TT	CC	TT	TT	CC	AA	AA	CC	CC	CC	GG	CC	CC	GG	GG
Bima 1	NUE79	TT	CC	TT	TT	TC	GG	AA	CC	CC	TC	GG	CC	CC	AA	AA
Baoshibamai	NUE80	TC	TC	GG	TC	CC	AG	CC	TT	TC	CC	GG	NN	TC	AA	AA
Ermangmai	NUE81	TT	CC	TT	TT	CC	AA	AA	CC	CC	CC	GG	CC	CC	GG	GG
Yulincao	NUE82	TT	CC	TT	TT	CC	AA	AA	CC	CC	CC	GG	CC	CC	GG	GG
Banjiemang	NUE83	TT	CC	TT	TT	CC	AA	AA	CC	CC	CC	GG	CC	CC	GG	GG
Duanganzhuganqing	NUE84	TC	TC	GG	TT	CC	AA	AA	CC	TC	CC	NN	CC	TC	NN	AA
Laohongmai	NUE85	TT	CC	TT	TT	CC	AA	AA	CC	CC	CC	GG	CC	CC	GG	GG
Daizimai	NUE86	NN	CC	GG	TC	CC	AA	AA	CC	TC	NN	GG	CC	TC	NN	AA
Xuzhou 14	NUE87	TT	CC	TT	TC	TC	NN	AA	TT	CC	NN	AA	CC	CC	GG	GG
Xiaofoshou	NUE88	TT	CC	TT	TT	CC	AA	AA	CC	CC	CC	GG	CC	CC	GG	GG
Zigancao	NUE89	TT	CC	TT	TT	CC	AA	AA	CC	CC	CC	GG	CC	CC	GG	GG
Zaoyangmai	NUE90	TT	CC	GG	TT	CC	GG	CC	CC	CC	NN	AA	CC	CC	AA	AA
Baimai	NUE91	TT	CC	TT	TT	CC	AA	AA	CC	CC	CC	GG	CC	CC	GG	GG
Youzimai	NUE92	TT	CC	TT	TT	CC	AA	AA	CC	CC	CC	GG	CC	CC	GG	GG
Youzimai	NUE93	TT	CC	TT	TT	CC	AA	AA	CC	CC	CC	GG	CC	CC	GG	GG
Chushanbao	NUE94	TT	CC	TT	TT	CC	AA	AA	CC	CC	CC	GG	CC	CC	GG	GG
LiuOer	NUE95	TT	CC	NN	TT	CC	AA	AA	CC	CC	CC	GG	CC	CC	GG	GG
Baimangcao	NUE96	TT	CC	TT	TT	CC	AA	AA	CC	CC	CC	GG	CC	CC	GG	GG
Jinzihong	NUE97	TT	CC	TT	TT	CC	AA	AA	CC	CC	TC	GG	CC	CC	GG	GG
Qiuzimai	NUE98	TT	CC	TT	TT	CC	AA	AA	CC	CC	NN	GG	CC	CC	GG	GG
Fangtoumai	NUE99	TC	TC	GG	TC	CC	AA	NN	CC	TC	TC	GG	CC	TC	AG	GG
Yixiaomai	NUE100	TT	CC	TT	TT	CC	AA	AA	CC	CC	CC	GG	CC	CC	GG	GG
Hongqulianmang	NUE101	TT	CC	TT	TT	CC	AA	AA	CC	CC	TC	GG	CC	CC	GG	GG
Youzitou	NUE102	TT	CC	TT	TT	CC	AA	AA	CC	CC	NN	GG	CC	CC	GG	GG
Baodijiang	NUE103	TT	CC	TT	TT	CC	AA	AA	CC	CC	CC	GG	CC	CC	GG	GG
Honggoudou	NUE104	TT	CC	TT	TT	CC	AA	AA	CC	CC	CC	GG	CC	CC	GG	GG
Yingsizhuang	NUE105	TT	CC	TT	TT	CC	AA	AA	CC	CC	NN	GG	CC	CC	GG	GG
Hongcantiao	NUE106	TT	CC	TT	TT	CC	AA	AA	CC	CC	CC	GG	CC	CC	GG	GG
Baihulu	NUE107	TT	CC	TT	TT	CC	AA	AA	CC	CC	CC	GG	CC	CC	GG	GG
Zaobanyue	NUE108	TT	CC	TT	TT	CC	AA	AA	CC	CC	TC	GG	CC	CC	GG	GG
Damai	NUE109	TC	CC	GG	TT	TC	AA	AA	CC	TC	CC	GG	CC	TC	GG	GG
Youmangsaogudan	NUE110	TT	CC	TT	TT	CC	AA	AA	CC	CC	CC	GG	CC	CC	GG	GG
Ermangmai	NUE111	TT	CC	TT	TT	CC	AA	AA	CC	CC	CC	GG	CC	CC	GG	GG
Zigancao	NUE112	TT	CC	TT	TT	CC	AA	AA	CC	CC	CC	GG	CC	CC	GG	GG
Duanermang	NUE113	TT	CC	TT	TT	CC	AA	AA	CC	CC	CC	GG	CC	CC	GG	GG
Hulutou	NUE114	TT	CC	TT	TT	CC	AA	AA	CC	CC	CC	GG	CC	CC	GG	GG
Zaosantian	NUE115	TT	CC	TT	TT	CC	AA	AA	CC	CC	NN	GG	CC	CC	GG	GG
Pushanba	NUE116	TT	CC	TT	TT	CC	AA	AA	CC	CC	CC	GG	CC	CC	GG	GG
Hongsuihong	NUE117	TT	CC	TT	TT	CC	AA	AA	CC	CC	CC	GG	CC	CC	GG	GG
Dazicao	NUE118	TT	CC	TT	TT	CC	AA	AA	CC	CC	CC	GG	CC	CC	GG	GG
Changzicao	NUE119	TT	CC	TT	TT	CC	AA	AA	CC	CC	CC	GG	CC	CC	GG	GG
Youzimai	NUE120	TT	CC	TT	TT	CC	AA	AA	CC	CC	NN	GG	CC	CC	GG	GG
Youmai	NUE121	TT	CC	TT	TT	CC	AA	AA	CC	CC	CC	GG	CC	CC	GG	GG
Liangguangtou	NUE122	TT	CC	TT	TT	CC	AA	AA	CC	CC	CC	GG	CC	CC	GG	GG
Dazihong	NUE123	TT	CC	TT	TT	CC	AA	AA	CC	CC	CC	GG	CC	CC	GG	GG
Cantiaomai	NUE124	TT	CC	TT	TT	CC	AA	AA	CC	CC	TC	GG	CC	CC	GG	GG
Huaiqingfumai	NUE125	TT	CC	TT	TT	CC	AA	AA	CC	CC	CC	GG	CC	CC	GG	GG
Baifumai	NUE126	TT	CC	TT	TT	CC	AA	AA	CC	CC	CC	GG	CC	CC	GG	GG
Baiyupi	NUE127	TT	CC	TT	TT	CC	AA	AA	CC	CC	NN	GG	CC	CC	GG	GG
Yangmai	NUE128	TT	CC	TT	TT	CC	AA	AA	CC	CC	NN	GG	CC	CC	GG	GG
Yingsizhuang	NUE129	TT	CC	TT	TT	CC	AA	AA	CC	CC	CC	GG	CC	CC	GG	GG
Zhuganqing	NUE130	TT	CC	TT	TT	CC	AA	CC	CC	CC	CC	GG	CC	CC	NN	GG
Neixiang 5	NUE131	TT	CC	GG	TT	CC	NN	AA	TT	TC	CC	GG	CC	TC	AA	AA
Baimai	NUE132	TT	CC	TT	TT	CC	AA	AA	CC	CC	CC	GG	CC	CC	GG	GG
Shiganmai	NUE133	TC	TC	NN	TC	TC	AA	AA	CC	TC	NN	AA	CC	TC	NN	GG
Ziganbaimangxian	NUE134	TT	CC	TT	TT	CC	AA	AA	CC	CC	CC	GG	CC	CC	GG	GG
Hongmai	NUE135	TT	CC	TT	TT	CC	AA	AA	CC	CC	CC	GG	CC	CC	GG	GG
Zaobanyue	NUE136	TT	CC	TT	TT	CC	AA	AA	CC	CC	CC	GG	CC	CC	GG	GG
Hongsuimai	NUE137	TT	CC	TT	TT	CC	AA	AA	CC	CC	NN	GG	CC	CC	GG	GG
Baimanghong	NUE138	TT	CC	TT	TT	CC	AA	AA	CC	CC	CC	GG	CC	CC	GG	GG
Sanyuehuang	NUE139	TT	CC	TT	TT	CC	AA	AA	CC	CC	CC	GG	CC	CC	GG	GG
Huisanbao	NUE140	TT	CC	TT	TT	CC	AA	AA	CC	CC	CC	GG	CC	CC	GG	GG
Sanbaoxian	NUE141	TT	CC	TT	TT	CC	AA	AA	CC	CC	CC	GG	CC	CC	GG	GG
Datouben	NUE142	TT	CC	TT	TT	CC	AA	AA	CC	CC	TC	GG	CC	CC	GG	GG
Baimanghong	NUE143	TT	CC	TT	TT	CC	AA	AA	CC	CC	CC	GG	CC	CC	GG	GG
Sanbaimai	NUE144	TT	CC	TT	TT	TC	NN	AA	CC	CC	CC	GG	CC	CC	GG	GG
Hongmanghong	NUE145	TT	CC	TT	TT	CC	AA	AA	CC	CC	CC	AG	CC	CC	GG	GG
Jiutouniao	NUE146	TC	TC	GG	TC	CC	AA	AA	CC	TC	CC	GG	CC	TC	AG	GG
Hongmangcao	NUE147	TT	CC	TT	TT	CC	AA	AA	CC	CC	CC	GG	CC	CC	GG	GG
Huolibeng	NUE148	TT	CC	TT	TT	CC	AA	AA	CC	CC	TC	GG	CC	CC	GG	GG
Baihulutou	NUE149	TT	CC	TT	TT	CC	AA	AA	CC	CC	NN	GG	CC	CC	GG	GG
Kaifeng 124	NUE150	TT	CC	TT	TT	CC	AA	AA	CC	CC	CC	GG	CC	CC	GG	GG
Fanglutou	NUE151	TT	CC	TT	TT	CC	AA	AA	CC	CC	CC	GG	CC	CC	GG	GG
Dawangshuibai	NUE152	TT	CC	TT	TT	CC	AA	AA	CC	CC	CC	GG	CC	CC	GG	GG
Manmai	NUE153	TT	CC	TT	TT	CC	AA	AA	CC	CC	CC	GG	CC	CC	GG	GG
Datouben	NUE154	TT	CC	TT	TT	CC	AA	AA	CC	CC	CC	GG	CC	CC	GG	GG
Baiyintiao	NUE155	TT	CC	TT	TT	CC	AA	AA	CC	CC	CC	GG	CC	CC	GG	GG
Dakoumai	NUE156	TT	CC	TT	TT	CC	AA	AA	CC	CC	NN	GG	CC	CC	GG	GG
Erjimai	NUE157	TT	CC	TT	TT	CC	AA	AA	CC	CC	CC	GG	CC	CC	GG	GG
Hongmanghongmai	NUE158	TT	CC	TT	TT	CC	AA	AA	CC	CC	NN	GG	CC	CC	GG	GG
Baitutou	NUE159	TT	CC	TT	TT	NN	AA	AA	CC	CC	CC	GG	CC	CC	GG	GG
Wangshanbai	NUE160	TT	CC	TT	TT	CC	AA	AA	CC	CC	CC	GG	CC	CC	GG	GG
Foshoumai	NUE161	TC	TC	GG	TC	CC	AA	AA	CC	TC	CC	GG	CC	TC	AG	GG
Dazicao	NUE162	TT	CC	TT	TT	CC	AA	AA	CC	CC	CC	GG	CC	CC	GG	GG
Hongheshangtou	NUE163	TT	CC	TT	TT	CC	AA	AA	CC	CC	CC	AA	CC	CC	GG	GG
Wuhuatou	NUE164	TT	CC	TT	TT	CC	AA	AA	CC	CC	CC	GG	CC	CC	GG	GG
Dongmai	NUE165	TC	TC	GG	TC	CC	AA	AA	CC	TC	NN	GG	CC	TC	AG	GG
Xuzhou 438	NUE166	TT	CC	TT	TT	CC	AA	AA	CC	CC	CC	GG	CC	CC	GG	GG
Baishenmai	NUE167	TT	CC	TT	TT	CC	AA	AA	CC	CC	CC	GG	CC	CC	GG	GG
Quanmangmai	NUE168	TT	CC	TT	TT	CC	AA	AA	CC	CC	CC	GG	CC	CC	GG	GG
Mala	NUE169	TT	CC	TT	TT	TC	AA	AA	TT	CC	TC	AA	CC	CC	GG	GG
Dazibai	NUE170	TT	CC	TT	TT	CC	AA	AA	CC	CC	CC	GG	CC	CC	GG	GG
Ermangmai	NUE171	TT	CC	TT	TT	CC	AA	AA	CC	CC	CC	GG	CC	CC	GG	GG
Jinsita	NUE172	TC	TC	GG	TC	CC	AA	AA	CC	TC	TC	GG	CC	TC	AG	GG
Hongjianmai	NUE173	TT	CC	TT	TT	CC	NN	AA	CC	CC	CC	GG	CC	CC	GG	GG
Baimangcao	NUE174	TT	CC	TT	TT	CC	AA	AA	CC	CC	CC	GG	CC	CC	GG	GG
Shuilaomai	NUE175	TT	CC	TT	TT	CC	AA	AA	CC	CC	CC	GG	CC	CC	GG	GG
Shandatou	NUE176	TT	CC	TT	TT	CC	AA	AA	CC	CC	CC	GG	CC	CC	GG	GG
Yingsizhuang	NUE177	TT	CC	TT	TT	CC	AA	AA	CC	CC	CC	GG	CC	CC	GG	GG
Jianmai	NUE178	TT	CC	TT	TT	CC	AA	AA	CC	CC	CC	GG	CC	CC	GG	GG
Nvmai	NUE179	TT	CC	TT	TT	CC	AA	AA	CC	CC	CC	GG	CC	CC	GG	GG
Kumai	NUE180	TT	CC	TT	TT	CC	AA	AA	CC	CC	CC	GG	CC	CC	GG	GG
Guangtoumai	NUE181	TT	CC	TT	TT	CC	AA	AA	CC	CC	CC	GG	CC	CC	GG	GG
Baiheshangtou	NUE182	TT	CC	TT	TT	TT	AG	AA	TT	CC	CC	GG	CC	CC	NN	AA
Wuzitoumai	NUE183	TC	TC	GG	TC	CC	AA	AA	CC	TC	NN	GG	CC	TC	NN	GG
Yubianmai	NUE184	TT	CC	TT	TT	TC	AG	AA	CC	CC	CC	GG	CC	CC	NN	AA
Duanganzhaoxiaomai	NUE185	TT	CC	GG	TT	CC	AA	CC	TT	TC	CC	GG	CC	TC	GG	GG
Dazihong	NUE186	TT	CC	TT	TT	CC	AA	NN	CC	CC	CC	GG	CC	CC	GG	GG
Heloubai	NUE187	TT	CC	TT	TT	CC	AA	AA	CC	CC	NN	GG	CC	CC	GG	GG
Baiquanmang	NUE188	TT	CC	TT	TT	CC	AA	AA	CC	CC	CC	GG	CC	CC	GG	GG
Pushanbamai	NUE189	TT	CC	TT	TT	CC	AA	AA	CC	CC	CC	GG	CC	CC	GG	GG
Zhaoziya	NUE190	TC	TC	GG	TT	CC	AA	AA	CC	TC	CC	NN	CC	TC	AA	AA
Baizhamang	NUE191	TT	CC	TT	TT	CC	AA	AA	CC	CC	CC	GG	CC	CC	GG	GG
Deguohong	NUE192	TT	CC	TT	TT	CC	AA	AA	CC	CC	TC	GG	CC	CC	GG	GG
Jianmai	NUE193	TT	CC	TT	TT	CC	AA	AA	CC	CC	CC	GG	CC	CC	GG	GG
Yanshi 4	NUE194	TT	CC	GG	TT	TC	GG	AA	TT	TC	CC	AA	CC	TC	NN	AG
Xinmai 19	NUE195	TT	CC	GG	TT	CC	AG	AA	TT	TC	CC	AA	CC	TC	AA	AA
Zheng 6 fu	NUE196	TT	CC	GG	TT	TC	NN	AA	TT	TC	CC	AA	CC	TC	AG	AA
Luomai 21	NUE197	TT	CC	GG	TT	TC	AA	AC	TT	TC	CC	AA	TC	TC	GG	GG
Yumai 26	NUE198	TT	CC	GG	TT	CC	AA	AA	TT	TC	CC	GG	CC	TC	AA	AA
Yumai 24	NUE199	TT	CC	GG	TT	TT	AG	AA	CC	TC	CC	AG	CC	TC	NN	AA
Yumai 10	NUE200	TT	CC	GG	TT	CC	AA	AC	TT	CC	CC	GG	TC	CC	NN	AA
Shannong 7859	NUE201	TC	CC	GG	TT	CC	AA	AC	TT	TC	CC	GG	TC	TC	AA	AA
Luohan 6	NUE202	TT	CC	NN	TT	CC	AG	CC	TT	TC	NN	AA	CC	TC	AA	AA
Xiaoyan 6	NUE203	TC	CC	GG	TT	CC	AA	CC	TT	TC	CC	GG	CC	TC	NN	AA
Bonong 7422	NUE204	TT	CC	GG	TT	CC	AA	CC	TT	TC	CC	GG	CC	TC	NN	AA
Bainong 3217	NUE205	TT	CC	GG	TT	TC	AA	AA	CC	TC	NN	NN	CC	TC	AG	AA
Zhengzhou 6	NUE206	TT	CC	GG	TT	TC	AG	AA	TT	TC	CC	AA	CC	TC	AA	AA
Zhengzhou 722	NUE207	TC	CC	GG	TT	CC	AA	CC	CC	TC	TC	GG	CC	TC	AA	AA
Zhengyin 1	NUE208	TT	CC	GG	TT	CC	AA	CC	CC	TC	CC	GG	CC	TC	AA	AA
Wan 7107	NUE209	TT	CC	GG	TT	CC	AA	AA	CC	TT	CC	GG	CC	TT	AA	AA
Yumai 47	NUE210	TT	CC	GG	TT	TC	AG	AA	CC	TC	CC	GG	CC	TC	NN	AA
Yumai 65	NUE211	TT	CC	GG	TT	CC	AG	AA	CC	TC	CC	GG	CC	TC	AA	AA
Zhilemai	NUE212	TT	CC	TT	TT	CC	AA	AA	CC	CC	CC	GG	CC	CC	GG	GG
Yumai 1	NUE213	TT	CC	GG	TT	CC	AA	CC	TT	TC	CC	AA	CC	TC	NN	AA
Puyang 5	NUE214	TT	CC	NN	TT	TT	AA	AA	TT	TC	NN	GG	CC	TC	AG	AA
Zhengzhou 17	NUE215	TT	CC	GG	TT	CC	AA	CC	TT	TC	CC	GG	CC	TC	NN	AA
Boai 7023	NUE216	TT	CC	GG	TT	CC	AA	CC	TT	TC	CC	AA	CC	TC	AA	AA
Afu	NUE217	TT	CC	GG	TT	CC	AA	AA	CC	TC	CC	NN	CC	TC	AG	AA
Een 1	NUE218	TT	CC	GG	TC	CC	AA	AC	TT	TC	CC	AA	TC	TC	AA	AA
Siyuecao	NUE219	TT	CC	TT	TT	CC	AA	AA	CC	CC	CC	GG	CC	CC	GG	GG
Baimanghong	NUE220	TT	CC	TT	TT	CC	AA	AA	CC	CC	CC	GG	CC	CC	GG	GG
Hunanbai	NUE221	TC	TC	GG	TT	NN	AA	AA	CC	TC	CC	GG	CC	TC	AA	AA
Ermangmai	NUE222	TT	CC	TT	TT	CC	AA	AA	CC	CC	CC	GG	CC	CC	GG	GG
Fengchan 3	NUE223	TC	CC	NN	TT	CC	AG	AA	TT	TC	CC	GG	CC	TC	NN	AA
Xiaohongmang	NUE224	TT	CC	TT	TT	CC	AA	AA	CC	CC	CC	GG	CC	CC	GG	GG
Jinguoyin	NUE225	TC	TC	GG	TT	CC	AA	AA	CC	TC	TC	GG	CC	TC	AA	AA
Baiyouzitou	NUE226	TT	CC	TT	TT	CC	AA	AA	TC	CC	CC	GG	CC	CC	AG	AG
Abo	NUE227	TC	CC	GG	TC	CC	AG	AA	CC	TC	NN	GG	CC	TC	NN	AA
Nanda 2419	NUE228	TT	CC	GG	TC	CC	AA	AA	CC	TC	NN	GG	CC	TC	NN	AA
Tiegancao	NUE229	TT	CC	GG	TC	CC	AA	CC	TT	TC	TC	GG	CC	TC	NN	AA
Bima 4	NUE230	TT	CC	TT	TT	TT	AG	AA	CC	CC	CC	GG	CC	CC	AA	AA
Xinong 6028	NUE231	TT	CC	TT	TT	CC	AA	AA	CC	CC	CC	GG	CC	CC	AA	AA
Xianmai	NUE232	TT	CC	TT	TT	CC	AA	AA	CC	CC	TC	GG	CC	CC	GG	GG
Baigedatou	NUE233	TT	CC	TT	TT	CC	AA	AA	CC	CC	CC	GG	CC	CC	GG	GG
Hongyouzitou	NUE234	TT	CC	TT	TT	CC	AA	AA	CC	CC	CC	GG	CC	CC	GG	GG
Kumai	NUE235	TT	CC	TT	TT	CC	AA	AA	CC	CC	CC	GG	CC	CC	GG	GG
Xiaoguangtou	NUE236	TT	CC	TT	TT	CC	AA	AA	CC	CC	CC	GG	CC	CC	GG	GG
Hongmangbaimai	NUE237	TT	CC	TT	TT	CC	AA	AA	CC	CC	CC	GG	CC	CC	GG	GG
Bensiyuehuang	NUE238	TT	CC	TT	TT	CC	AA	AA	NN	CC	CC	GG	CC	CC	GG	GG
Sulianzaoshu 1	NUE239	TT	CC	GG	TT	CC	GG	AA	TT	CC	TC	AA	CC	CC	GG	GG
Pingyuan 50	NUE240	TT	CC	TT	TT	CC	AA	AA	CC	CC	CC	GG	CC	CC	GG	GG
Heshangtou	NUE241	TT	CC	TT	TT	CC	AA	AA	CC	CC	TC	GG	CC	CC	GG	GG
Xuzhou 8	NUE242	TT	CC	TT	TC	TC	GG	AA	TT	CC	TC	AA	CC	CC	GG	GG
Yududasuibai	NUE243	TT	CC	TT	TT	CC	AA	AA	CC	CC	CC	GG	CC	CC	GG	GG
Hongheshangtou	NUE244	TT	CC	TT	TT	CC	AA	AA	CC	CC	CC	GG	CC	CC	GG	GG
