# Supplementary material
Source: Research Square preprint supplement (doi:10.21203/rs.3.rs-9009137/v1)
Supplement: Supplementary file 4 [file 5c801e466d4180add4fa18ef.xlsx]

## Sheet: Supplementary Data 9
Supplementary Data 9. Germplasm description of the 1007 accessions used in this study.
Accession name	TaNPF7.6-A1 allele	Accession name in China (WWWG2B)	GRU StorCode	GRU ID-Plant	Synonym 1	Synonym 2	Country of origin	Locality	Latitude	Longitude	Growth habit	Group in this study
ability	mod	WWWSC00828	WGED0562	40100	Gediflux ID 562	W9343	UK	/	-35.3132	149.101	/	Modern cultivar
Agron	mod	WWWSC00829	WGED0194	39950	Gediflux ID 194	0	Austria	/	48.2269	16.3496	winter	Modern cultivar
Alba	mod	WWWSC00830	WGED0014	39770	Gediflux ID 14	W0357	Netherlands	/	52.3738	4.8969	winter	Modern cultivar
Albatross	mod	WWWSC00831	WGED0203	39959	Gediflux ID 203	0	Germany	/	52.5159	13.3715	winter	Modern cultivar
Alcedo	mod	WWWSC00832	WGED0077	39833	Gediflux ID 77	W2192	Germany	/	52.5159	13.3715	winter	Modern cultivar
Alert	mod	WWWSC00833	WGED0656	40194	Gediflux ID 656	0	UK	/	51.4934	-0.2681	winter	Modern cultivar
Almus	mod	WWWSC00834	WGED0254	40010	Gediflux ID 254	0	Germany	/	52.5159	13.3715	winter	Modern cultivar
Altria	mod	WWWSC00835	WGED0164	39920	Gediflux ID 164	0	France	/	48.859	2.3476	winter	Modern cultivar
Arminda	mod	WWWSC00836	WGED0097	39853	Gediflux ID 97	W2864	France	/	48.859	2.3476	winter	Modern cultivar
Aronde	lan	WWWSC00837	W0060	13682	-	0	France	/	48.859	2.3476	winter	Modern cultivar
Avalon	mod	WWWSC00838	WGED0085	39841	Gediflux ID 85	W2564	UK	/	51.4934	-0.2681	winter	Modern cultivar
avocet	mod	WWWSC00839	WGED0510	40048	Gediflux ID 510	W4116	UK	/	51.4934	-0.2681	winter	Modern cultivar
Aztec	lan	WWWSC00840	WGED0163	39919	Gediflux ID 163	0	France	/	48.859	2.3476	winter	Modern cultivar
Banco	mod	WWWSC00841	WGED0062	39818	Gediflux ID 62	W1208	Sweden	/	59.3152	18.0401	winter	Modern cultivar
Bandit	mod	WWWSC00842	WGED0568	40106	Gediflux ID 568	W9357	UK	/	51.4934	-0.2681	winter	Modern cultivar
Banner	mod	WWWSC00843	WGED0537	40075	Gediflux ID 537	W6862	UK	/	51.4934	-0.2681	winter	Modern cultivar
Beauchamp	mod	WWWSC00844	WGED0110	39866	Gediflux ID 110	W3598	France	/	48.859	2.3476	winter	Modern cultivar
Beaver	mod	WWWSC00845	WGED0143	39899	Gediflux ID 143	W6955	UK	/	51.4934	-0.2681	winter	Modern cultivar
Becard/Kachu	mod	WWWSC00846	WREN0301	45673	-	0	Mexico	/	19.4194	-99.1308	/	Modern cultivar
Bersee	mod	WWWSC00847	WGED0002	39758	Gediflux ID 2	W0116	UK	/	51.4934	-0.2681	winter	Modern cultivar
blitz	mod	WWWSC00848	WGED0657	40195	Gediflux ID 657	0	UK	/	19.4194	-99.1308	spring	Modern cultivar
Boreonos	mod	WWWSC00849	WGED0256	40012	Gediflux ID 256	0	UK	/	51.4934	-0.2681	winter	Modern cultivar
Bounty	mod	WWWSC00850	WGED0090	39846	Gediflux ID 90	W2594	UK	/	51.4934	-0.2681	winter	Modern cultivar
Boxer	mod	WWWSC00851	WGED0540	40078	Gediflux ID 540	W6903	UK	/	51.4934	-0.2681	winter	Modern cultivar
Buster	mod	WWWSC00852	WGED0573	40111	Gediflux ID 573	W9367	UK	/	51.4934	-0.2681	winter	Modern cultivar
Calif	lan	WWWSC00853	WGED0205	39961	Gediflux ID 205	0	Austria	/	48.2269	16.3496	winter	Modern cultivar
Camp Remy	lan	WWWSC00854	WGED0150	39906	Gediflux ID 150	W7521	France	/	48.859	2.3476	winter	Modern cultivar
Capitaine	mod	WWWSC00855	WGED0175	39931	Gediflux ID 175	0	Belgium	/	50.8693	4.3325	winter	Modern cultivar
Capo	mod	WWWSC00856	WGED0195	39951	Gediflux ID 195	0	Austria	/	48.2269	16.3496	winter	Modern cultivar
Cappelle Desprez	mod	WWWSC00857	WGED0018	39774	Gediflux ID 18	W0385	France	/	48.859	2.3476	winter	Modern cultivar
captor	mod	WWWSC00858	WGED0529	40067	Gediflux ID 529	W6821	Germany	/	41.9262	12.4175	winter	Modern cultivar
Catamaran	mod	WWWSC00859	WGED0574	40112	Gediflux ID 574	W9371	France	/	51.4934	-0.2681	winter	Modern cultivar
Cezanne	mod	WWWSC00860	WGED0167	39923	Gediflux ID 167	0	France	/	48.859	2.3476	winter	Modern cultivar
Charger	mod	WWWSC00861	WGED0166	39922	Gediflux ID 166	0	France	/	48.859	2.3476	winter	Modern cultivar
Cimcog 26	mod	WWWSC00862	WREN0304	45676	CIMMYT GID 8203758	0	Mexico	/	19.4194	-99.1308	/	Modern cultivar
Cimcog 3	mod	WWWSC00863	WREN0303	45675	CIMMYT GID 8067329	0	Mexico	/	19.4194	-99.1308	/	Modern cultivar
Cimcog 32	mod	WWWSC00864	WREN0305	45677	CIMMYT GID 8067511	0	Mexico	/	19.4194	-99.1308	/	Modern cultivar
Cimcog 47	mod	WWWSC00865	WREN0306	45678	CIMMYT GID 8066916	0	Mexico	/	19.4194	-99.1308	/	Modern cultivar
Cimcog 56	mod	WWWSC00866	WREN0309	45681	CIMMYT GID 6179253	0	Mexico	/	19.4194	-99.1308	/	Modern cultivar
Courtot	lan	WWWSC00869	WGED0101	39857	Gediflux ID 101	W2892	France	/	48.859	2.3476	winter	Modern cultivar
Crest	mod	WWWSC00870	WGED0666	40204	Gediflux ID 666	W8343	USA	/	51.4934	-0.2681	winter	Modern cultivar
Crusoe	mod	WWWSC00871	W10080	23207	-	0	United Kingdom	/	51.5078	-0.1277	winter	Modern cultivar
david	mod	WWWSC00872	WGED0105	39861	Gediflux ID 105	W3268	Austria	/	48.2269	16.3496	winter	Modern cultivar
denver	mod	WWWSC00873	WGED0724	40230	Gediflux ID 724	W9944	UK	/	38.9398	-77.0155	spring	Modern cultivar
Diablo	mod	WWWSC00874	WGED0583	40121	Gediflux ID 583	W9382	UK	/	51.4934	-0.2681	winter	Modern cultivar
Diplomat	mod	WWWSC00875	WGED0049	39805	Gediflux ID 49	W0838	Germany	/	52.5159	13.3715	winter	Modern cultivar
Disponent	lan	WWWSC00876	WGED0095	39851	Gediflux ID 95	W2822	Germany	/	52.5159	13.3715	winter	Modern cultivar
Dorby	mod	WWWSC00877	WGED0584	40122	Gediflux ID 584	W9383	France	/	51.4934	-0.2681	winter	Modern cultivar
Drake	mod	WWWSC00878	WGED0722	40228	Gediflux ID 722	0	UK	/	51.4934	-0.2681	winter	Modern cultivar
Drauhofener Kolben	mod	WWWSC00879	WGED0197	39953	Gediflux ID 197	0	Austria	/	48.2269	16.3496	winter	Modern cultivar
Druid	mod	WWWSC00880	WGED0534	40072	Gediflux ID 534	W6831	France	/	51.4934	-0.2681	winter	Modern cultivar
eagle	mod	WWWSC00881	WGED0520	40058	Gediflux ID 520	W5572	USA	/	51.4934	-0.2681	winter	Modern cultivar
Encore	mod	WWWSC00882	WGED0671	40209	Gediflux ID 671	W9385	UK	/	51.4934	-0.2681	winter	Modern cultivar
Equinox	mod	WWWSC00883	WGED0279	40035	Gediflux ID 279	0	UK	/	51.4934	-0.2681	winter	Modern cultivar
Erla Kolben	mod	WWWSC00884	WGED0223	39979	Gediflux ID 223	0	Austria	/	48.2269	16.3496	winter	Modern cultivar
Erland	mod	WWWSC00885	WGED0539	40077	Gediflux ID 539	W6864	Sweden	/	51.4934	-0.2681	winter	Modern cultivar
Eros	mod	WWWSC00886	WGED0260	40016	Gediflux ID 260	0	UK	/	51.4934	-0.2681	winter	Modern cultivar
Extrem	mod	WWWSC00888	WGED0225	39981	Gediflux ID 225	0	Germany	/	52.5159	13.3715	winter	Modern cultivar
Fanal	mod	WWWSC00889	WGED0261	40017	Gediflux ID 261	0	UK	/	51.4934	-0.2681	winter	Modern cultivar
Felix	mod	WWWSC00890	WGED0042	39798	Gediflux ID 42	W0760	Netherlands	/	52.3738	4.8969	winter	Modern cultivar
festival	mod	WWWSC00891	WGED0107	39863	Gediflux ID 107	W3474	France	/	48.859	2.3476	winter	Modern cultivar
fidel	mod	WWWSC00892	WGED0109	39865	Gediflux ID 109	W3558	France	/	48.859	2.3476	winter	Modern cultivar
Fiorello	lan	WWWSC00894	W9506	22633	-	0	Kazakhstan	/	51.1185	71.4697	/	Modern cultivar
Flair	mod	WWWSC00895	WGED0239	39995	Gediflux ID 239	0	Germany	/	52.5159	13.3715	winter	Modern cultivar
Flame	mod	WWWSC00896	WGED0155	39911	Gediflux ID 155	W9390	UK	/	51.4934	-0.2681	winter	Modern cultivar
Flamingo	mod	WWWSC00897	WGED0008	39764	Gediflux ID 8	W0334	UK	/	51.4934	-0.2681	winter	Modern cultivar
Florida	lan	WWWSC00898	WGED0142	39898	Gediflux ID 142	W6923	Denmark	/	55.6762	12.5679	winter	Modern cultivar
Gabo	lan	WWWSC00899	W9508	22635	-	0	Australia	/	-35.3079	149.113	winter	Modern cultivar
Galahad	mod	WWWSC00900	WGED0092	39848	Gediflux ID 92	W2785	UK	/	51.4934	-0.2681	winter	Modern cultivar
Garcia	mod	WWWSC00901	Not Assigned	0	-	0	France	/	48.859	2.3476	/	Modern cultivar
Gawain	mod	WWWSC00902	WGED0119	39875	Gediflux ID 119	W3789	Denmark	/	55.6762	12.5679	winter	Modern cultivar
Grafton	mod	WWWSC00904	-	0	-	0	UK	/	51.4934	-0.2681	/	Modern cultivar
Granada	mod	WWWSC00905	WGED0123	39879	Gediflux ID 123	W4173	Netherlands	/	52.3738	4.8969	winter	Modern cultivar
Haven	mod	WWWSC00906	WGED0144	39900	Gediflux ID 144	W6957	UK	/	51.4934	-0.2681	winter	Modern cultivar
Heine 7	mod	WWWSC00907	WGED0009	39765	Gediflux ID 9	W0335	Germany	/	52.5159	13.3715	winter	Modern cultivar
Highbury	mod	WWWSC00909	W1576	15111	-	0	UK	/	51.4934	-0.2681	spring	Modern cultivar
Hobbit	mod	WWWSC00910	WGED0070	39826	Gediflux ID 70	W1578	UK	/	51.4934	-0.2681	winter	Modern cultivar
Holdfast	mod	WWWSC00911	WGED0025	39781	Gediflux ID 25	W0499	UK	/	51.4934	-0.2681	winter	Modern cultivar
holster	mod	WWWSC00912	WGED0663	40201	Gediflux ID 663	0	UK	/	51.4934	-0.2681	winter	Modern cultivar
Ibis	mod	WWWSC00914	WGED0133	39889	Gediflux ID 133	W6488	Netherlands	/	52.3738	4.8969	winter	Modern cultivar
Iena	lan	WWWSC00915	WGED0202	39958	Gediflux ID 202	0	Germany	/	52.5159	13.3715	winter	Modern cultivar
Ikarus	mod	WWWSC00916	WGED0235	39991	Gediflux ID 235	0	Austria	/	48.2269	16.3496	winter	Modern cultivar
Joss Cambier	mod	WWWSC00917	WGED0037	39793	Gediflux ID 37	W0576	France	/	48.859	2.3476	winter	Modern cultivar
Karat	mod	WWWSC00918	WGED0215	39971	Gediflux ID 215	0	Austria	/	48.2269	16.3496	winter	Modern cultivar
Koga 1	lan	WWWSC00919	W0081	13702	-	0	Germany	/	52.5159	13.3715	spring	Modern cultivar
Kontrast	mod	WWWSC00920	WGED0242	39998	Gediflux ID 242	0	Austria	/	48.2269	16.3496	winter	Modern cultivar
Kosack	mod	WWWSC00921	WGED0210	39966	Gediflux ID 210	0	Sweden	/	59.3152	18.0401	winter	Modern cultivar
KWS Santiago	mod	WWWSC00923	W10338	37786	-	0	UK	/	51.5078	-0.1277	winter	Modern cultivar
Lancelot	mod	WWWSC00924	WGED0598	40136	Gediflux ID 598	W9407	France	/	51.4934	-0.2681	winter	Modern cultivar
Leda	mod	WWWSC00925	WGED0015	39771	Gediflux ID 15	W0363	Netherlands	/	52.3738	4.8969	winter	Modern cultivar
Legend	mod	WWWSC00926	WGED0561	40099	Gediflux ID 561	W9254	UK	/	51.4934	-0.2681	winter	Modern cultivar
Longbow	mod	WWWSC00927	WGED0122	39878	Gediflux ID 122	W4115	UK	/	51.4934	-0.2681	winter	Modern cultivar
Lutin	mod	WWWSC00928	WGED0080	39836	Gediflux ID 80	W2468	France	/	48.859	2.3476	winter	Modern cultivar
Mahndorfer	mod	WWWSC00929	WGED0056	39812	Gediflux ID 56	W1074	Germany	/	52.5159	13.3715	winter	Modern cultivar
Marco	mod	WWWSC00931	WGED0189	39945	Gediflux ID 189	0	Belgium	/	50.8693	4.3325	winter	Modern cultivar
Maris Dove	mod	WWWSC00932	W0005	13628	-	0	UK	/	51.4934	-0.2681	spring	Modern cultivar
Maris Huntsman	mod	WWWSC00933	WGED0040	39796	Gediflux ID 40	W0730	UK	/	51.4934	-0.2681	winter	Modern cultivar
Maris ranger	mod	WWWSC00934	WGED0035	39791	Gediflux ID 35	W0571	UK	/	51.4934	-0.2681	winter	Modern cultivar
Maris Widgeon	mod	WWWSC00935	WGED0121	39877	Gediflux ID 121	W4114	UK	/	51.4934	-0.2681	winter	Modern cultivar
mendel	mod	WWWSC00936	WGED0058	39814	Gediflux ID 58	W1159	Netherlands	/	52.3738	4.8969	winter	Modern cultivar
mercia	mod	WWWSC00937	WGED0116	39872	Gediflux ID 116	W3685	UK	/	51.4934	-0.2681	winter	Modern cultivar
mina	mod	WWWSC00938	WGED0186	39942	Gediflux ID 186	0	Belgium	/	50.8693	4.3325	winter	Modern cultivar
Minister	mod	WWWSC00939	WGED0124	39880	Gediflux ID 124	W4223	UK	/	51.4934	-0.2681	winter	Modern cultivar
Mironovska	mod	WWWSC00940	WGED0068	39824	Gediflux ID 68	W1341	Germany	/	52.5159	13.3715	winter	Modern cultivar
MISR 1	mod	WWWSC00941	WREN0310	45682	CIMMYT GID 8066180	0	Mexico	/	19.4194	-99.1308	/	Modern cultivar
Moisson	mod	WWWSC00942	WGED0162	39918	Gediflux ID 162	0	France	/	48.859	2.3476	winter	Modern cultivar
Muck	lan	WWWSC00943	WGED0245	40001	Gediflux ID 245	0	UK	/	51.4934	-0.2681	winter	Modern cultivar
Multiweiss	mod	WWWSC00944	WGED0052	39808	Gediflux ID 52	W0845	Austria	/	48.2269	16.3496	winter	Modern cultivar
Nautica	mod	WWWSC00945	WGED0103	39859	Gediflux ID 103	W3160	Netherlands	/	52.3738	4.8969	winter	Modern cultivar
Newhaven	mod	WWWSC00946	WGED0659	40197	Gediflux ID 659	0	UK	/	51.4934	-0.2681	winter	Modern cultivar
Norda	mod	WWWSC00947	WGED0174	39930	Gediflux ID 174	0	Belgium	/	50.8693	4.3325	winter	Modern cultivar
Obelisk	lan	WWWSC00948	WGED0264	40020	Gediflux ID 264	0	UK	/	51.4934	-0.2681	winter	Modern cultivar
Odeon	mod	WWWSC00949	WGED0147	39903	Gediflux ID 147	W7137	Belgium	/	50.8693	4.3325	winter	Modern cultivar
Odin	mod	WWWSC00950	WGED0138	39894	Gediflux ID 138	W6641	Sweden	/	59.3152	18.0401	winter	Modern cultivar
Oenus	mod	WWWSC00951	WGED0217	39973	Gediflux ID 217	0	Austria	/	48.2269	16.3496	winter	Modern cultivar
Opata	mod	WWWSC00952	WBCDB0038	27036	-	0	Mexico	/	19.4194	-99.1308	spring	Modern cultivar
Orlando	mod	WWWSC00953	WGED0078	39834	Gediflux ID 78	W2455	Germany	/	52.5159	13.3715	winter	Modern cultivar
Palur	mod	WWWSC00954	WGED0265	40021	Gediflux ID 265	0	UK	/	51.4934	-0.2681	winter	Modern cultivar
Pamyat Azieva	lan	WWWSC00955	WREN0311	45683	-	0	Kazakhstan	/	51.1185	71.4697	/	Modern cultivar
Pastiche	lan	WWWSC00956	WGED0127	39883	Gediflux ID 127	W5550	UK	/	51.4934	-0.2681	winter	Modern cultivar
Pavon 76	mod	WWWSC00957	W9767	22894	-	0	Mexico	/	19.4194	-99.1308	winter	Modern cultivar
Pepital	mod	WWWSC00958	WGED0247	40003	Gediflux ID 247	0	Denmark	/	55.6762	12.5679	winter	Modern cultivar
Peragis	lan	WWWSC00959	WGED0001	39757	Gediflux ID 1	W0087	Germany	/	52.5159	13.3715	winter	Modern cultivar
Perlo	mod	WWWSC00960	WGED0106	39862	Gediflux ID 106	W3466	Austria	/	48.2269	16.3496	winter	Modern cultivar
Pfau	mod	WWWSC00961	WREN0313	45685	CIMMYT GID 8067758	0	Mexico	/	19.4194	-99.1308	/	Modern cultivar
Pomerelle	mod	WWWSC00962	W10316	33371	-	0	USA	/	38.9398	-77.0155	spring	Modern cultivar
Pony	mod	WWWSC00963	WGED0177	39933	Gediflux ID 177	0	Belgium	/	50.8693	4.3325	winter	Modern cultivar
Prof Marshall	mod	WWWSC00964	WGED0016	39772	Gediflux ID 16	W0367	UK	/	51.4934	-0.2681	winter	Modern cultivar
Prophet	mod	WWWSC00965	WGED0608	40146	Gediflux ID 608	W9423	UK	/	51.4934	-0.2681	winter	Modern cultivar
Rabe	mod	WWWSC00966	WGED0140	39896	Gediflux ID 140	W6652	Germany	/	52.5159	13.3715	winter	Modern cultivar
Rebel	mod	WWWSC00967	WGED0512	40050	Gediflux ID 512	W4258	UK	/	51.4934	-0.2681	winter	Modern cultivar
Recital	mod	WWWSC00968	WGED0169	39925	Gediflux ID 169	0	France	/	48.859	2.3476	winter	Modern cultivar
Record	mod	WWWSC00969	WGED0227	39983	Gediflux ID 227	0	Austria	/	48.2269	16.3496	winter	Modern cultivar
Red Fife	mod	WWWSC00970	W0253	13857	-	0	Canada	/	45.4327	-75.6937	spring	Modern cultivar
Reedling	mod	WWWSC00971	WREN0314	45686	-	0	Mexico	/	19.4194	-99.1308	/	Modern cultivar
Regent	mod	WWWSC00972	WGED0220	39976	Gediflux ID 220	0	Austria	/	48.2269	16.3496	winter	Modern cultivar
Rendezvous	mod	WWWSC00974	WGED0509	40047	Gediflux ID 509	W4112	UK	/	51.4934	-0.2681	winter	Modern cultivar
Revelation	mod	WWWSC00975	W10190	23317	-	0	UK	/	51.4934	-0.2681	winter	Modern cultivar
Riband	mod	WWWSC00976	WGED0128	39884	Gediflux ID 128	W5552	UK	/	51.4934	-0.2681	winter	Modern cultivar
Rimpaus Bastard 2	mod	WWWSC00977	WGED0267	40023	Gediflux ID 267	0	Germany	/	52.5159	13.3715	winter	Modern cultivar
Scipion	lan	WWWSC00982	WGED0168	39924	Gediflux ID 168	0	France	/	48.859	2.3476	winter	Modern cultivar
Shamrock	lan	WWWSC00983	WGED0281	40037	Gediflux ID 281	0	UK	/	51.4934	-0.2681	winter	Modern cultivar
Shango	mod	WWWSC00984	WGED0713	40219	Gediflux ID 713	0	UK	/	51.4934	-0.2681	winter	Modern cultivar
Sicco	lan	WWWSC00985	W2133	15653	-	0	Netherlands	/	52.3738	4.8969	spring	Modern cultivar
Soleil	mod	WWWSC00988	WGED0517	40055	Gediflux ID 517	W5569	France	/	51.4934	-0.2681	winter	Modern cultivar
solstice	mod	WWWSC00989	WGED0719	40225	Gediflux ID 719	0	Netherland	/	51.5078	-0.1277	winter	Modern cultivar
Spark	mod	WWWSC00990	WGED0159	39915	Gediflux ID 159	W9442	UK	/	51.4934	-0.2681	winter	Modern cultivar
Spitfire	mod	WWWSC00992	WGED0712	40218	Gediflux ID 712	0	UK	/	51.4934	-0.2681	winter	Modern cultivar
Sportsman	mod	WWWSC00993	WGED0084	39840	Gediflux ID 84	W2588	UK	/	51.4934	-0.2681	winter	Modern cultivar
Stamm 101	mod	WWWSC00994	WGED0221	39977	Gediflux ID 221	0	Germany	/	52.5159	13.3715	winter	Modern cultivar
Starke 2	mod	WWWSC00995	WGED0112	39868	Gediflux ID 112	W3612	Sweden	/	59.3152	18.0401	winter	Modern cultivar
Stella	mod	WWWSC00997	W0369	13961	-	0	Belgium	/	50.8693	4.3325	winter	Modern cultivar
Super 152	mod	WWWSC00998	WREN0316	45688	CIMMYT GID 6119993	0	Mexico	/	19.4194	-99.1308	/	Modern cultivar
Svale	mod	WWWSC00999	WGED0212	39968	Gediflux ID 212	0	Germany	/	52.5159	13.3715	winter	Modern cultivar
Tadorna	lan	WWWSC01000	WGED0115	39871	Gediflux ID 115	W3638	Netherlands	/	52.3738	4.8969	winter	Modern cultivar
Talent	mod	WWWSC01001	WGED0072	39828	Gediflux ID 72	W2087	France	/	48.859	2.3476	winter	Modern cultivar
Tambor	lan	WWWSC01002	WGED0229	39985	Gediflux ID 229	0	Austria	/	48.2269	16.3496	winter	Modern cultivar
Tandem	mod	WWWSC01003	WGED0536	40074	Gediflux ID 536	W6848	USA	/	51.4934	-0.2681	winter	Modern cultivar
Tanker	mod	WWWSC01004	WGED0720	40226	Gediflux ID 720	0	UK	/	51.4934	-0.2681	winter	Modern cultivar
Taras	lan	WWWSC01005	WGED0271	40027	Gediflux ID 271	0	UK	/	51.4934	-0.2681	winter	Modern cultivar
Thatcher	lan	WWWSC01006	W9552	22679	-	0	USA	/	38.9398	-77.0155	spring	Modern cultivar
Thor	mod	WWWSC01007	WGED0004	39760	Gediflux ID 4	W0326	UK	/	51.4934	-0.2681	winter	Modern cultivar
Titus	mod	WWWSC01008	WGED0066	39822	Gediflux ID 66	W1331	Austria	/	48.2269	16.3496	winter	Modern cultivar
Top	mod	WWWSC01009	WGED0081	39837	Gediflux ID 81	W2486	France	/	48.859	2.3476	winter	Modern cultivar
torch	mod	WWWSC01010	WGED0626	40164	Gediflux ID 626	W9449	UK	/	51.4934	-0.2681	winter	Modern cultivar
Torfrida	mod	WWWSC01011	WGED0161	39917	Gediflux ID 161	W9469	UK	/	51.4934	-0.2681	winter	Modern cultivar
Trafalgar	mod	WWWSC01012	WGED0658	40196	Gediflux ID 658	0	UK	/	51.4934	-0.2681	winter	Modern cultivar
Treasure	lan	WWWSC01013	W10317	33372	-	0	USA	/	38.9398	-77.0155	spring	Modern cultivar
Tremie	mod	WWWSC01014	WGED0172	39928	Gediflux ID 172	0	France	/	48.859	2.3476	winter	Modern cultivar
Triumph NDL	lan	WWWSC01015	WGED0272	40028	Gediflux ID 272	0	Netherlands	/	52.3738	4.8969	winter	Modern cultivar
Tschermaks	lan	WWWSC01016	WGED0273	40029	Gediflux ID 273	0	UK	/	51.4934	-0.2681	winter	Modern cultivar
Turpin	mod	WWWSC01017	WGED0629	40167	Gediflux ID 629	W9456	UK	/	51.4934	-0.2681	winter	Modern cultivar
Urban	mod	WWWSC01018	WGED0141	39897	Gediflux ID 141	W6919	Denmark	/	55.6762	12.5679	winter	Modern cultivar
Vaguedepis	mod	WWWSC01019	WGED0022	39778	Gediflux ID 22	W0438	France	/	48.859	2.3476	winter	Modern cultivar
veritas	mod	WWWSC01020	WGED0673	40211	Gediflux ID 673	W9457	UK	/	51.5078	-0.1277	winter	Modern cultivar
Vilmorin 27	mod	WWWSC01021	WGED0023	39779	Gediflux ID 24	W0441	France	/	48.859	2.3476	winter	Modern cultivar
Virgo	mod	WWWSC01023	WGED0053	39809	Gediflux ID 53	W0848	Sweden	/	59.3152	18.0401	winter	Modern cultivar
Vocal	mod	WWWSC01024	WGED0523	40061	Gediflux ID 523	W5576	UK	/	51.4934	-0.2681	winter	Modern cultivar
Voyage	lan	WWWSC01025	WGED0560	40098	Gediflux ID 560	W8656	France	/	51.4934	-0.2681	winter	Modern cultivar
Walde	mod	WWWSC01026	WGED0113	39869	Gediflux ID 113	W3613	Sweden	/	59.3152	18.0401	winter	Modern cultivar
Warrior	mod	WWWSC01027	WGED0549	40087	Gediflux ID 549	W6928	UK	/	51.4934	-0.2681	winter	Modern cultivar
wasp	mod	WWWSC01028	WGED0630	40168	Gediflux ID 630	W9458	UK	/	-35.3079	149.113	winter	Modern cultivar
WATDE0001	mod	WWWSC00171	WATDE0001	37800	1190004 - 1	0	Iraq	Baqubah	33.7535	44.6091	spring	Landrace (AG6)
WATDE0002	lan	WWWSC00536	WATDE0002	37804	1190007 - 1	0	Australia	/	-35.3079	149.113	spring	Landrace (AG6)
WATDE0003	mod	WWWSC00648	WATDE0003	37828	1190023 - 1	0	Australia	/	-35.3079	149.113	spring	Landrace (AG6)
WATDE0004	mod	WWWSC00226	WATDE0004	37838	1190032 - 1	0	India	Sandhori, Nushki, Baluchistan	29.5442	65.9954	spring	Landrace (AG5)
WATDE0005	lan	WWWSC00227	WATDE0005	37840	1190034 - 1	0	India	Etawah market, Etawah, United Provinces	26.7853	79.0206	spring	Landrace (AG3)
WATDE0006	mod	WWWSC00372	WATDE0006	37849	1190040 - 1	0	France	/	48.859	2.3476	winter	Landrace (AG2)
WATDE0007	mod	WWWSC00796	WATDE0007	37852	1190042 - 1	0	France	/	48.859	2.3476	spring	Landrace (AG2)
WATDE0008	mod	WWWSC00587	WATDE0008	37854	1190044 - 1	0	Morocco	Granja Agricola, Quebdana, Melilla	35.3147	-2.9547	spring	Landrace (AG7)
WATDE0009	mod	WWWSC00630	WATDE0009	37856	1190045 - 1	0	Syria	Lebanon, Bekaa, Baalbek, Damascus	34.0732	35.9106	spring	Landrace (AG7)
WATDE0010	mod	WWWSC00797	WATDE0010	37899	1190079 - 1	0	India	United Provinces	26.7256	84.2297	spring	Landrace (AG5)
WATDE0011	lan	WWWSC00455	WATDE0011	37902	1190081 - 1	0	India	Sikkim	27.4878	88.4039	spring	Landrace (AG5)
WATDE0012	mod	WWWSC00380	WATDE0012	37914	1190092 - 1	0	India	Jaswantnagar market, Etawa, United Provinces	26.8734	80.2525	winter	Landrace (AG3)
WATDE0013	lan	WWWSC00687	WATDE0013	37927	1190103 - 1	0	Italy	/	41.9262	12.4175	spring	Landrace (AG7)
WATDE0014	mod	WWWSC00371	WATDE0014	37935	1190110 - 1	0	France	/	48.859	2.3476	winter	Landrace (AG2)
WATDE0015	lan	WWWSC00234	WATDE0015	37955	1190126 - 1	0	India	United Provinces	26.8734	80.2525	spring	Landrace (AG3)
WATDE0016	lan	WWWSC00014	WATDE0016	37956	1190127 - 1	0	India	Kurk, Sibi, Baluchistan	29.5655	67.9034	spring	Landrace (AG5)
WATDE0017	lan	WWWSC00660	WATDE0017	37973	1190139 - 1	0	France	/	48.859	2.3476	spring	Landrace (AG7)
WATDE0018	lan	WWWSC00548	WATDE0018	37975	1190141 - 2	0	China	Mukden	41.8203	123.395	spring	Landrace (AG6)
WATDE0019	mod	WWWSC00606	WATDE0019	37980	1190145 - 1	0	Spain	Navarre	42.716	-1.6731	spring	Landrace (AG6)
WATDE0020	mod	WWWSC00407	WATDE0020	37984	1190149 - 1	0	United Kingdom	/	51.5078	-0.1277	spring	Landrace (AG2)
WATDE0021	lan	WWWSC00769	WATDE0021	37999	1190160 - 2	0	Spain	Navarre	42.716	-1.6731	spring	Landrace (AG7)
WATDE0022	mod	WWWSC00401	WATDE0022	38028	1190181 - 1	0	Poland	/	52.2597	21.0415	spring	Landrace (AG5)
WATDE0023	lan	WWWSC00755	WATDE0023	38051	1190199 - 1	0	India	Margnzani, Sibi, Baluchistan	29.556	67.8746	spring	Landrace (AG3)
WATDE0024	mod	WWWSC00136	WATDE0024	38065	1190209 - 1	0	Egypt	/	30.0035	31.2598	spring	Landrace (AG2)
WATDE0025	mod	WWWSC00590	WATDE0025	38073	1190216 - 1	0	Morocco	Zenatas, Shaouia	33.4753	-7.6984	spring	Landrace (AG6)
WATDE0026	mod	WWWSC00635	WATDE0026	38075	1190218 - 1	0	Tunisia	Soul-el-Khemis	36.6132	8.9669	spring	Landrace (AG6)
WATDE0027	mod	WWWSC00623	WATDE0027	38076	1190219 - 1	0	Spain	Vallodolid district	41.6406	-4.7354	spring	Landrace (AG6)
WATDE0028	mod	WWWSC00541	WATDE0028	38080	1190223 - 1	0	Burma	Ketku, E Jawnghwe State	16.474	102.828	spring	Landrace (AG6)
WATDE0029	mod	WWWSC00798	WATDE0029	38081	1190224 - 3	0	China	Tsinan district	36.0657	120.364	spring	Landrace (AG6)
WATDE0030	lan	WWWSC00799	WATDE0030	38090	1190231 - 2	0	Hungary	/	47.5125	19.0111	spring	Landrace (AG2)
WATDE0031	lan	WWWSC00261	WATDE0031	38101	1190238 - 1	0	Iran	Mehraban, N Hamadan	34.806	48.5176	spring	Landrace (AG4)
WATDE0032	mod	WWWSC00781	WATDE0032	38102	1190239 - 1	0	Spain	Gallegos, Salamanca	40.8499	-6.7091	spring	Landrace (AG6)
WATDE0033	mod	WWWSC00155	WATDE0033	38113	1190246 - 1	0	India	Sadar Killa Saifulla, Upper Zhob, Baluchistan	31.0473	68.3282	spring	Landrace (AG1)
WATDE0034	lan	WWWSC00690	WATDE0034	38122	1190254 - 1	0	Morocco	Tazi, Kenitra	34.9567	-6.3867	spring	Landrace (AG7)
WATDE0035	lan	WWWSC00800	WATDE0035	38135	1190264 - 1	0	Canary Islands	Teneriffe	28.2681	-16.6327	spring	Landrace (AG6)
WATDE0036	mod	WWWSC00189	WATDE0036	38144	1190273 - 1	0	Spain	Valverde del Camino, Huelva	37.5741	-6.7538	spring	Landrace (AG6)
WATDE0037	mod	WWWSC00776	WATDE0037	38164	1190291 - 1	0	Cyprus	Whole Island	35.1876	33.3794	spring	Landrace (AG6)
WATDE0038	mod	WWWSC00801	WATDE0038	38165	1190292 - 1	0	Cyprus	Paphos district.	34.8831	32.5201	spring	Landrace (AG6)
WATDE0039	mod	-	WATDE0039	38172	1190299 – 1	0	Turkey	Seraikeuy	37.9358	29.1226	spring	Landrace (AG4)
WATDE0040	lan	WWWSC00802	WATDE0040	38173	1190300 - 1	0	Turkey	Kirk Agach, 50 miles NE of Izmir	38.412	27.2967	spring	Landrace (AG4)
WATDE0041	lan	WWWSC00562	WATDE0041	38179	1190305 - 1	0	Egypt	/	30.0035	31.2598	spring	Landrace (AG6)
WATDE0042	lan	WWWSC00262	WATDE0042	38183	1190308 - 1	0	Iran	Rasht, Caspian shore	37.279	49.5898	spring	Landrace (AG4)
WATDE0043	lan	WWWSC00310	WATDE0043	38192	1190313 - 1	0	Burma	S. Shan States (Imperial Institute)	21.8801	97.9814	/	Landrace (AG7)
WATDE0044	mod	WWWSC00279	WATDE0044	38209	1190324 - 1	0	United Kingdom	/	51.5078	-0.1277	winter	Landrace (AG2)
WATDE0045	mod	WWWSC00539	WATDE0045	38210	1190325 - 1	0	Australia	/	-35.3079	149.113	spring	Landrace (AG2)
WATDE0046	lan	WWWSC00649	WATDE0046	38243	1190349 - 1	0	Bulgaria	Varna, Voditza	43.2143	27.9099	spring	Landrace (AG5)
WATDE0047	lan	WWWSC00295	WATDE0047	38245	1190352 - 1	0	Yugoslavia	Bugojno, Travnik, Bosnia	44.0564	17.4465	spring	Landrace (AG4)
WATDE0048	mod	WWWSC00413	WATDE0048	38249	1190355 - 1	0	Yugoslavia	Bukovica, Dalmatia	43.6022	20.213	spring	Landrace (AG6)
WATDE0049	lan	WWWSC00050	WATDE0049	38257	1190360 - 1	0	Yugoslavia	Veliko Hoce	46.4864	15.6463	spring	Landrace (AG5)
WATDE0050	mod	WWWSC00628	WATDE0050	38290	1190387 - 1	0	Spain	Minorca, southern part of Mahon	39.8871	4.263	spring	Landrace (AG6)
WATDE0051	lan	WWWSC00706	WATDE0051	38300	1190396 - 1	0	Portugal	Golegã	39.4025	-8.4884	spring	Landrace (AG7)
WATDE0052	lan	WWWSC00703	WATDE0052	38302	1190397 - 1	0	Portugal	Extremoz	38.8378	-7.6044	spring	Landrace (AG7)
WATDE0053	mod	WWWSC00597	WATDE0053	38303	1190398 - 1	0	Palestine	/	31.7673	35.2052	spring	Landrace (AG6)
WATDE0054	lan	WWWSC00147	WATDE0054	38313	1190406 - 1	0	India	Hasanganj, Unnao, United Provinces	26.8734	80.2525	spring	Landrace (AG3)
WATDE0055	lan	WWWSC00149	WATDE0055	38333	1190420 - 1	0	India	Barchhamai, Mainpuri, United Provinces	26.8734	80.2525	spring	Landrace (AG7)
WATDE0056	lan	WWWSC00247	WATDE0056	38348	1190433 - 1	0	India	Musafirpur, Upper Zhob, Baluchistan	31.3359	69.4722	spring	Landrace (AG3)
WATDE0057	lan	WWWSC00062	WATDE0057	38358	1190440 - 1	0	China	/	39.6572	116.251	spring	Landrace (AG1)
WATDE0058	mod	WWWSC00553	WATDE0058	38363	1190444 - 3	0	China	/	39.6572	116.251	spring	Landrace (AG6)
WATDE0059	lan	WWWSC00478	WATDE0059	38373	1190451 - 1	0	Romania	/	44.4434	26.1558	winter	Landrace (AG5)
WATDE0060	lan	WWWSC00356	WATDE0060	38385	1190460 - 1	0	Afghanistan	/	34.5084	68.9417	spring	Landrace (AG5)
WATDE0061	lan	WWWSC00357	WATDE0061	38395	1190468 - 1	0	Afghanistan	/	34.5084	68.9417	spring	Landrace (AG3)
WATDE0062	lan	WWWSC00301	WATDE0062	38398	1190471 - 1	0	Afghanistan	/	34.5084	68.9417	spring	Landrace (AG3)
WATDE0063	lan	WWWSC00113	WATDE0063	38401	1190474 - 1	0	Afghanistan	/	34.5084	68.9417	spring	Landrace (AG3)
WATDE0064	lan	WWWSC00206	WATDE0064	38402	1190475 - 1	0	Afghanistan	/	34.5084	68.9417	spring	Landrace (AG3)
WATDE0065	lan	WWWSC00473	WATDE0065	38408	1190481 - 1	0	Poland	/	52.2597	21.0415	winter	Landrace (AG5)
WATDE0066	lan	WWWSC00693	WATDE0066	38410	1190483 - 1	0	Poland	/	52.2597	21.0415	spring	Landrace (AG4)
WATDE0067	mod	WWWSC00595	WATDE0067	38426	1190496 - 1	0	Morocco	Mazagan district	33.2355	-8.498	spring	Landrace (AG6)
WATDE0068	mod	WWWSC00307	WATDE0068	38440	1190507 - 1	0	Australia	/	-35.3079	149.113	spring	Landrace (AG7)
WATDE0069	lan	WWWSC00613	WATDE0069	38492	1190546 - 1	0	Spain	Navarre	42.716	-1.6731	spring	Landrace (AG6)
WATDE0070	lan	WWWSC00719	WATDE0070	38497	1190551 - 1	0	Spain	Navarre	42.716	-1.6731	spring	Landrace (AG7)
WATDE0071	lan	WWWSC00564	WATDE0071	38508	1190560 - 1	0	Greece	Corfu Island	39.6242	19.9218	spring	Landrace (AG6)
WATDE0072	mod	WWWSC00444	WATDE0072	38510	1190562 - 1	0	Greece	Tripolis district, Peloponese	37.5101	22.3708	spring	Landrace (AG6)
WATDE0073	lan	WWWSC00145	WATDE0073	38515	1190566 - 1	0	Greece	Pygros district, Peloponese	38.2376	21.7407	spring	Landrace (AG6)
WATDE0074	lan	WWWSC00121	WATDE0074	38517	1190568 - 1	0	China	Yuan Hsing Shen General Store, Tung An Men Ta-Chieh, Peking. Grown S metropolitan area	39.9333	116.298	spring	Landrace (AG1)
WATDE0075	lan	WWWSC00258	WATDE0075	38531	1190579 - 1	0	Iran	Hamadan	34.806	48.5176	spring	Landrace (AG3)
WATDE0076	lan	WWWSC00266	WATDE0076	38532	1190580 - 1	0	Iran	Rasht, Caspian shore	37.279	49.5898	spring	Landrace (AG4)
WATDE0077	lan	WWWSC00176	WATDE0077	38546	1190591 - 1	0	Portugal	Frontiera	39.0559	-7.6473	spring	Landrace (AG5)
WATDE0078	lan	WWWSC00008	WATDE0078	38563	1190605 - 1	0	Greece	American farm school.	40.5715	22.9882	spring	Landrace (AG5)
WATDE0079	lan	WWWSC00650	WATDE0079	38589	1190624 - 3	0	Bulgaria	Vetovo	43.7021	26.2613	winter	Landrace (AG5)
WATDE0080	mod	WWWSC00102	WATDE0080	38593	1190627 - 1	0	Iran	Asadabad, SW Hamadan	34.806	48.5176	spring	Landrace (AG4)
WATDE0081	mod	WWWSC00803	WATDE0081	38596	1190629 - 1	0	Iran	Hashdarud, Azerbaijan province	37.8971	44.9428	spring	Landrace (AG4)
WATDE0082	lan	WWWSC00490	WATDE0082	38608	1190637 - 1	0	Turkey	Kirk Agach, 50 miles NE of Izmir	38.4337	27.1779	spring	Landrace (AG5)
WATDE0083	mod	WWWSC00659	WATDE0083	38610	1190639 - 1	0	Crete	Yerolakko, Canea	35.5125	24.0247	spring	Landrace (AG7)
WATDE0084	lan	WWWSC00438	WATDE0084	38627	1190651 - 1	0	China	/	39.6572	116.251	winter	Landrace (AG5)
WATDE0085	lan	WWWSC00658	WATDE0085	38628	1190652 - 1	0	China	/	39.6572	116.251	winter	Landrace (AG2)
WATDE0086	lan	WWWSC00479	WATDE0086	38640	1190662 - 1	0	Romania	/	44.4434	26.1558	spring	Landrace (AG5)
WATDE0087	lan	WWWSC00777	WATDE0087	38648	1190670 - 1	0	Poland	/	52.2597	21.0415	spring	Landrace (AG5)
WATDE0088	lan	WWWSC00283	WATDE0088	38650	1190671 - 1	0	USSR	Armenia	40.4551	44.8095	spring	Landrace (AG4)
WATDE0089	lan	WWWSC00269	WATDE0089	38663	1190680 - 1	0	Italy	Aquila	42.3583	13.3915	spring	Landrace (AG5)
WATDE0090	lan	WWWSC00716	WATDE0090	38666	1190683 - 1	0	Spain	Navarre	42.716	-1.6731	spring	Landrace (AG6)
WATDE0091	mod	WWWSC00783	WATDE0091	38668	1190685 - 1	0	Spain	Campiñas, Seville	37.3879	-5.9839	spring	Landrace (AG6)
WATDE0092	mod	WWWSC00667	WATDE0092	38673	1190690 - 1	0	Greece	Kalvarita district, Peloponese	38.033	22.1114	spring	Landrace (AG6)
WATDE0093	mod	WWWSC00093	WATDE0093	38677	1190694 - 2	0	India	Punjab	30.763	75.0681	spring	Landrace (AG3)
WATDE0094	lan	WWWSC00789	WATDE0094	38682	1190698 - 1	0	China	/	39.6572	116.251	spring	Landrace (AG1)
WATDE0095	lan	WWWSC00004	WATDE0095	38684	1190700 - 1	0	China	/	39.6572	116.251	spring	Landrace (AG1)
WATDE0096	lan	WWWSC00163	WATDE0096	38688	1190704 - 1	0	Iran	53 miles SE of Yazd, Mehdiabad	31.8976	54.3532	spring	Landrace (AG3)
WATDE0098	lan	WWWSC00099	WATDE0098	38691	1190707 - 2	0	India	Panjpai, Shorarud, Baluchistan	29.9135	66.4958	spring	Landrace (AG3)
WATDE0099	mod	WWWSC00369	WATDE0099	38708	1190722 - 1	0	China	/	39.6572	116.251	spring	Landrace (AG5)
WATDE0100	mod	WWWSC00255	WATDE0100	38717	1190729 - 1	0	Iran	Jiruft & Roodbar, Kerman	29.1571	57.8357	spring	Landrace (AG4)
WATDE0101	lan	WWWSC00237	WATDE0101	38720	1190731 - 1	0	India	Sikkim	27.4878	88.4039	spring	Landrace (AG3)
WATDE0102	mod	WWWSC00385	WATDE0102	38721	1190732 - 1	0	India	Sikkim	27.4878	88.4039	spring	Landrace (AG2)
WATDE0103	lan	WWWSC00501	WATDE0103	38732	1190740 - 2	0	USSR	Siberia	55.0219	82.7056	winter	Landrace (AG5)
WATDE0104	mod	WWWSC00526	WATDE0104	38734	1190742 - 1	0	Algeria	/	36.7384	3.1485	spring	Landrace (AG6)
WATDE0105	lan	WWWSC00032	WATDE0105	38739	1190746 - 1	0	USSR	Azerbaijan	40.3805	48.038	spring	Landrace (AG4)
WATDE0106	lan	WWWSC00007	WATDE0106	38740	1190747 - 1	0	Ethiopia	/	8.6656	39.6262	spring	Landrace (AG4)
WATDE0107	lan	WWWSC00036	WATDE0107	38742	1190749 - 1	0	USSR	Siberia	55.0219	82.7056	spring	Landrace (AG4)
WATDE0108	lan	WWWSC00497	WATDE0108	38744	1190750 - 1	0	USSR	Ukraine	49.2768	31.9869	spring	Landrace (AG5)
WATDE0109	lan	WWWSC00495	WATDE0109	38749	1190753 - 1	0	USSR	Don	47.242	39.7131	winter	Landrace (AG5)
WATDE0110	lan	WWWSC00110	WATDE0110	38773	1190771 - 1	0	USSR	Irkutsk	52.3113	104.292	spring	Landrace (AG5)
WATDE0111	lan	WWWSC00087	WATDE0111	38783	1190777 - 1	0	Finland	/	60.1838	24.9243	spring	Landrace (AG5)
WATDE0112	lan	WWWSC00104	WATDE0112	38792	1190784 - 1	0	Italy	Royal Exp. Sta. Rieti	42.4048	12.8554	spring	Landrace (AG1)
WATDE0113	lan	WWWSC00042	WATDE0113	38796	1190788 - 1	0	USSR	Turkestan	43.4429	68.2226	spring	Landrace (AG4)
WATDE0114	lan	WWWSC00029	WATDE0114	38797	1190789 - 2	0	USSR	Kunduz, Turkestan	36.7036	68.8803	spring	Landrace (AG4)
WATDE0115	lan	WWWSC00108	WATDE0115	38828	1190811 - 1	0	Tunisia	Maison Carree	43.8383	4.3562	spring	Landrace (AG1)
WATDE0116	mod	WWWSC00191	WATDE0116	38832	1190814 - 1	0	Tunisia	Tunis	36.796	10.1714	spring	Landrace (AG6)
WATDE0117	lan	WWWSC00754	WATDE0117	38835	1190816 - 1	0	Italy	Piacenza	45.0476	9.6957	spring	Landrace (AG1)
WATDE0118	lan	WWWSC00085	WATDE0118	38850	1190827 - 1	0	China	Shanghai (Tsao-Ka-Doo)	31.0784	121.432	spring	Landrace (AG1)
WATDE0119	lan	WWWSC00450	WATDE0119	38858	1190912 - 3	0	Hungary	/	47.5125	19.0111	winter	Landrace (AG5)
WATDE0120	mod	WWWSC00586	WATDE0120	37797	1190001 - 2	0	Morocco	Mazagan district	33.2355	-8.498	spring	Landrace (AG6)
WATDE0121	mod	WWWSC00556	WATDE0121	37798	1190002 - 1	0	Crete	Plain of Messara, Candia district	35.3381	25.1349	spring	Landrace (AG6)
WATDE0122	lan	WWWSC00793	WATDE0122	37799	1190003 - 4	0	Iran	Abbas Abad, Shahriar district, SW of Tehran	35.7166	51.3869	spring	Landrace (AG3)
WATDE0123	mod	WWWSC00534	WATDE0123	37801	1190005 - 1	0	Australia	/	-35.3079	149.113	spring	Landrace (AG6)
WATDE0124	mod	WWWSC00535	WATDE0124	37802	1190006 - 3	0	Australia	/	-35.3079	149.113	spring	Landrace (AG6)
WATDE0126	mod	WWWSC00605	WATDE0126	37805	1190008 - 1	0	Portugal	Monforte	39.0529	-7.4376	spring	Landrace (AG6)
WATDE0127	mod	WWWSC00602	WATDE0127	37806	1190009 - 3	0	Portugal	Ferreira do Alemtejo	38.059	-8.1122	spring	Landrace (AG6)
WATDE0129	lan	WWWSC00575	WATDE0129	37808	1190010 - 1	0	India	Pusa, Bihar	25.9776	85.6489	spring	Landrace (AG6)
WATDE0131	lan	WWWSC00772	WATDE0131	37810	1190011 - 1	0	India	Pusa, Bihar	25.9776	85.6489	spring	Landrace (AG5)
WATDE0133	lan	WWWSC00457	WATDE0133	37812	1190012 - 1	0	India	Pusa, Bihar	25.9776	85.6489	spring	Landrace (AG5)
WATDE0134	mod	WWWSC00308	WATDE0134	37813	1190013 - 1	0	Bulgaria	Elena (German seed)	42.9287	25.8767	spring	Landrace (AG2)
WATDE0136	lan	WWWSC00293	WATDE0136	37815	1190014 - 1	0	Yugoslavia	Vissegrad, Sarajevo, Bosnia	43.8586	18.4309	winter	Landrace (AG5)
WATDE0138	lan	WWWSC00511	WATDE0138	37817	1190015 - 2	0	Yugoslavia	Uzice, Bosnia	43.8531	19.8462	spring	Landrace (AG5)
WATDE0140	lan	WWWSC00724	WATDE0140	37819	1190016 - 1	0	Spain	/	40.3276	-3.7965	spring	Landrace (AG7)
WATDE0141	mod	WWWSC00725	WATDE0141	37820	1190017 - 2	0	Spain	/	40.3276	-3.7965	spring	Landrace (AG2)
WATDE0143	lan	WWWSC00804	WATDE0143	37822	1190018 - 1	0	India	Srinagor, Kashmir	34.1061	74.8061	spring	Landrace (AG5)
WATDE0144	lan	WWWSC00456	WATDE0144	37823	1190019 - 1	0	India	East Bahraich, United Provinces	27.5755	81.5994	spring	Landrace (AG5)
WATDE0145	lan	WWWSC00458	WATDE0145	37824	1190020 - 1	0	India	Khudadad, Nasirabad, Baluchistan	30.8316	66.4826	spring	Landrace (AG5)
WATDE0146	lan	WWWSC00451	WATDE0146	37825	1190021 - 1	0	India	Hostan, Sibi, Baluchistan	29.5464	67.88	spring	Landrace (AG5)
WATDE0148	mod	WWWSC00424	WATDE0148	37827	1190022 - 1	0	Australia	/	-35.3079	149.113	spring	Landrace (AG6)
WATDE0149	lan	WWWSC00358	WATDE0149	37829	1190024 - 1	0	Australia	/	-35.3079	149.113	spring	Landrace (AG6)
WATDE0150	lan	WWWSC00532	WATDE0150	37830	1190025 - 1	0	Australia	/	-35.3079	149.113	spring	Landrace (AG6)
WATDE0151	lan	WWWSC00425	WATDE0151	37831	1190026 - 1	0	Australia	/	-35.3079	149.113	spring	Landrace (AG5)
WATDE0152	lan	WWWSC00423	WATDE0152	37832	1190027 - 1	0	Australia	/	-35.3079	149.113	spring	Landrace (AG5)
WATDE0153	lan	WWWSC00359	WATDE0153	37833	1190028 - 1	0	Australia	/	-35.3079	149.113	spring	Landrace (AG5)
WATDE0154	mod	WWWSC00529	WATDE0154	37834	1190029 - 1	0	Australia	/	-35.3079	149.113	spring	Landrace (AG6)
WATDE0156	mod	WWWSC00056	WATDE0156	37836	1190030 - 1	0	Australia	/	-35.3079	149.113	spring	Landrace (AG6)
WATDE0157	lan	WWWSC00786	WATDE0157	37837	1190031 - 1	0	Australia	/	-35.3079	149.113	spring	Landrace (AG5)
WATDE0158	mod	WWWSC00569	WATDE0158	37839	1190033 - 1	0	India	Sandhori, Nushki, Baluchistan	29.5442	65.9954	spring	Landrace (AG6)
WATDE0159	lan	WWWSC00398	WATDE0159	37841	1190035 - 1	0	Poland	/	52.2597	21.0415	winter	Landrace (AG5)
WATDE0160	lan	WWWSC00396	WATDE0160	37842	1190036 - 2	0	Poland	/	52.2597	21.0415	winter	Landrace (AG5)
WATDE0162	lan	WWWSC00403	WATDE0162	37844	1190037 - 1	0	Poland	/	52.2597	21.0415	winter	Landrace (AG5)
WATDE0164	lan	WWWSC00399	WATDE0164	37846	1190038 - 1	0	Poland	/	52.2597	21.0415	winter	Landrace (AG5)
WATDE0165	lan	WWWSC00393	WATDE0165	37847	1190039 - 1	0	Italy	Sicily	37.5958	13.9446	winter	Landrace (AG5)
WATDE0168	mod	WWWSC00370	WATDE0168	37851	1190041 - 4	0	France	/	48.859	2.3476	spring	Landrace (AG2)
WATDE0169	lan	WWWSC00738	WATDE0169	37853	1190043 - 1	0	Tunisia	Béja	36.7294	9.1858	spring	Landrace (AG7)
WATDE0171	lan	WWWSC00805	WATDE0171	37857	1190046 - 1	0	Crete	Lakkous, Cydonia, Canea	35.515	24.0206	spring	Landrace (AG6)
WATDE0173	lan	WWWSC00342	WATDE0173	37859	1190047 - 1	0	Spain	Navarre	42.716	-1.6731	spring	Landrace (AG2)
WATDE0174	lan	WWWSC00337	WATDE0174	37860	1190048 - 1	0	Spain	Navarre	42.716	-1.6731	spring	Landrace (AG2)
WATDE0175	lan	WWWSC00343	WATDE0175	37861	1190049 - 1	0	Spain	Navarre	42.716	-1.6731	spring	Landrace (AG2)
WATDE0176	mod	WWWSC00334	WATDE0176	37862	1190050 - 1	0	Spain	Navarre	42.716	-1.6731	spring	Landrace (AG2)
WATDE0177	lan	WWWSC00344	WATDE0177	37863	1190051 - 1	0	Spain	Navarre	42.716	-1.6731	spring	Landrace (AG6)
WATDE0178	mod	WWWSC00333	WATDE0178	37864	1190052 - 1	0	Spain	Navarre	42.716	-1.6731	spring	Landrace (AG2)
WATDE0180	mod	WWWSC00619	WATDE0180	37866	1190053 - 1	0	Spain	Valdepeñas district in heart of "La Mancha" wine district	38.7643	-3.3879	spring	Landrace (AG6)
WATDE0181	mod	WWWSC00620	WATDE0181	37867	1190054 - 1	0	Spain	Slopes of Sierra Morena near La Carolina, Jaen	38.2742	-3.6186	spring	Landrace (AG6)
WATDE0182	lan	WWWSC00621	WATDE0182	37868	1190055 - 1	0	Spain	E side of "La Virgen de la Peña", Huelva	37.2633	-6.9443	spring	Landrace (AG5)
WATDE0183	mod	WWWSC00273	WATDE0183	37869	1190056 - 1	0	Spain	Arcediano, Salamanca	41.1058	-5.5585	spring	Landrace (AG5)
WATDE0184	mod	WWWSC00696	WATDE0184	37870	1190057 - 4	0	Portugal	Vila Franca de Xira	38.9425	-8.9717	spring	Landrace (AG2)
WATDE0185	mod	WWWSC00695	WATDE0185	37871	1190058 - 1	0	Portugal	Elvas	38.8812	-7.1631	spring	Landrace (AG6)
WATDE0187	mod	WWWSC00806	WATDE0187	37873	1190059 - 1	0	Portugal	Coruche	38.9605	-8.5258	spring	Landrace (AG6)
WATDE0188	mod	WWWSC00332	WATDE0188	37874	1190060 - 1	0	Portugal	Castro Verde	52.2597	21.0415	spring	Landrace (AG2)
WATDE0190	lan	WWWSC00339	WATDE0190	37876	1190061 - 1	0	Spain	Gordejuela, Vizcaya	43.1785	-3.0768	spring	Landrace (AG2)
WATDE0191	lan	WWWSC00718	WATDE0191	37877	1190062 - 1	0	Spain	Durango, Vizcaya	43.1637	-2.6328	spring	Landrace (AG2)
WATDE0192	lan	WWWSC00405	WATDE0192	37878	1190063 - 2	0	Spain	Navarre	42.716	-1.6731	spring	Landrace (AG5)
WATDE0194	lan	WWWSC00348	WATDE0194	37880	1190064 - 1	0	Spain	Abadiano, Vizcaya	43.1502	-2.6097	spring	Landrace (AG2)
WATDE0195	lan	WWWSC00482	WATDE0195	37881	1190065 - 1	0	Spain	Elorrio, Vizcaya	43.1296	-2.5421	spring	Landrace (AG7)
WATDE0196	lan	WWWSC00615	WATDE0196	37882	1190066 - 1	0	Spain	/	40.3276	-3.7965	spring	Landrace (AG6)
WATDE0198	lan	WWWSC00485	WATDE0198	37884	1190067 - 1	0	Spain	Navarre	42.716	-1.6731	spring	Landrace (AG7)
WATDE0199	lan	WWWSC00487	WATDE0199	37885	1190068 - 1	0	Spain	/	40.3276	-3.7965	spring	Landrace (AG5)
WATDE0200	lan	WWWSC00341	WATDE0200	37886	1190069 - 1	0	Spain	Navarre	42.716	-1.6731	spring	Landrace (AG7)
WATDE0202	lan	WWWSC00338	WATDE0202	37888	1190070 - 1	0	Spain	Durango, Vizcaya	43.1637	-2.6328	spring	Landrace (AG2)
WATDE0203	lan	WWWSC00428	WATDE0203	37889	1190071 - 1	0	Bulgaria	Elena	42.9287	25.8767	spring	Landrace (AG5)
WATDE0204	lan	WWWSC00507	WATDE0204	37890	1190072 - 1	0	Yugoslavia	Kozarice, Novska, Croatia	45.3885	16.9674	spring	Landrace (AG5)
WATDE0205	lan	WWWSC00540	WATDE0205	37891	1190073 - 1	0	Bulgaria	Elena (German seed)	42.9287	25.8767	spring	Landrace (AG5)
WATDE0206	mod	WWWSC00350	WATDE0206	37892	1190074 - 2	0	Yugoslavia	Zagreb, Croatia	45.8238	15.9808	spring	Landrace (AG2)
WATDE0207	mod	WWWSC00352	WATDE0207	37893	1190075 - 1	0	Yugoslavia	Novi Sad	45.2757	19.835	winter	Landrace (AG2)
WATDE0209	mod	WWWSC00411	WATDE0209	37895	1190076 - 1	0	Yugoslavia	Zagreb, Croatia	45.8157	15.987	winter	Landrace (AG2)
WATDE0211	mod	WWWSC00351	WATDE0211	37897	1190077 - 1	0	Yugoslavia	Novi Marof, Croatia	46.1706	16.3414	spring	Landrace (AG2)
WATDE0212	lan	WWWSC00504	WATDE0212	37898	1190078 - 1	0	Yugoslavia	Vidovec, Varazdin, Croatia	46.2909	16.2425	spring	Landrace (AG5)
WATDE0214	lan	WWWSC00578	WATDE0214	37901	1190080 - 1	0	India	Srinagor, Kashmir	34.1061	74.8061	spring	Landrace (AG5)
WATDE0215	lan	WWWSC00387	WATDE0215	37903	1190082 - 1	0	India	Barri, Mainpuri, United Provinces	27.2272	79.0246	spring	Landrace (AG3)
WATDE0216	lan	WWWSC00616	WATDE0216	37904	1190083 - 1	0	Spain	Rigotia, Biscay	43.2842	-2.7828	spring	Landrace (AG7)
WATDE0217	mod	WWWSC00340	WATDE0217	37905	1190084 - 1	0	Spain	/	40.3276	-3.7965	spring	Landrace (AG2)
WATDE0219	lan	WWWSC00483	WATDE0219	37907	1190085 - 1	0	Spain	Arcediano, Salamanca	41.1058	-5.5585	spring	Landrace (AG5)
WATDE0220	lan	WWWSC00146	WATDE0220	37908	1190086 - 2	0	India	Sandilla, Hardoi, United Provinces	26.8734	80.2525	spring	Landrace (AG7)
WATDE0221	lan	WWWSC00242	WATDE0221	37909	1190087 - 1	0	India	Gorakhpur Govt. Agril. Farm, United Provinces	26.763	83.3819	spring	Landrace (AG6)
WATDE0222	mod	WWWSC00174	WATDE0222	37910	1190088 - 1	0	Poland	Castro Verde	52.2597	21.0415	spring	Landrace (AG6)
WATDE0223	mod	WWWSC00306	WATDE0223	37911	1190089 - 1	0	Australia	/	-35.3079	149.113	spring	Landrace (AG2)
WATDE0224	lan	WWWSC00770	WATDE0224	37912	1190090 - 1	0	Australia	/	-35.3079	149.113	/	Landrace (AG5)
WATDE0225	mod	WWWSC00388	WATDE0225	37913	1190091 - 2	0	India	Karez Sargesha, Dalbandin, Baluchistan	28.9015	64.4007	winter	Landrace (AG2)
WATDE0227	mod	WWWSC00672	WATDE0227	37916	1190093 - 1	0	India	Shishari, Nushki, Baluchistan	29.046	66.2266	spring	Landrace (AG6)
WATDE0228	mod	WWWSC00673	WATDE0228	37917	1190094 - 1	0	India	Shishari, Nushki, Baluchistan	29.046	66.2266	spring	Landrace (AG2)
WATDE0229	mod	WWWSC00366	WATDE0229	37918	1190095 - 1	0	China	/	39.6572	116.251	winter	Landrace (AG2)
WATDE0230	mod	WWWSC00404	WATDE0230	37919	1190096 - 1	0	Romania	/	44.4434	26.1558	winter	Landrace (AG2)
WATDE0232	lan	WWWSC00397	WATDE0232	37921	1190097 - 1	0	Poland	/	52.2597	21.0415	winter	Landrace (AG2)
WATDE0233	lan	WWWSC00470	WATDE0233	37922	1190098 - 1	0	Poland	/	52.2597	21.0415	spring	Landrace (AG5)
WATDE0234	lan	WWWSC00472	WATDE0234	37923	1190099 - 1	0	Poland	/	52.2597	21.0415	spring	Landrace (AG5)
WATDE0235	mod	WWWSC00330	WATDE0235	37924	1190100 - 1	0	Poland	/	52.2597	21.0415	spring	Landrace (AG2)
WATDE0236	lan	WWWSC00392	WATDE0236	37925	1190101 - 1	0	Italy	/	41.9262	12.4175	winter	Landrace (AG2)
WATDE0237	lan	WWWSC00686	WATDE0237	37926	1190102 - 1	0	Italy	/	41.9262	12.4175	spring	Landrace (AG7)
WATDE0238	mod	WWWSC00329	WATDE0238	37928	1190104 - 1	0	Italy	/	41.9262	12.4175	spring	Landrace (AG2)
WATDE0239	lan	WWWSC00316	WATDE0239	37929	1190105 - 1	0	France	/	48.859	2.3476	winter	Landrace (AG2)
WATDE0241	lan	WWWSC00807	WATDE0241	37931	1190106 - 1	0	France	/	48.859	2.3476	spring	Landrace (AG2)
WATDE0242	lan	WWWSC00315	WATDE0242	37932	1190107 - 1	0	France	/	48.859	2.3476	spring	Landrace (AG2)
WATDE0243	lan	WWWSC00808	WATDE0243	37933	1190108 - 1	0	France	/	48.859	2.3476	spring	Landrace (AG2)
WATDE0244	lan	WWWSC00318	WATDE0244	37934	1190109 - 1	0	France	/	48.859	2.3476	spring	Landrace (AG2)
WATDE0246	lan	WWWSC00689	WATDE0246	37937	1190111 - 1	0	Morocco	Mazagan district	33.2355	-8.498	spring	Landrace (AG7)
WATDE0247	lan	WWWSC00741	WATDE0247	37938	1190112 - 2	0	Turkey	/	39.9344	32.8182	spring	Landrace (AG7)
WATDE0248	lan	WWWSC00486	WATDE0248	37939	1190113 - 1	0	Spain	Granada zone	37.1609	-3.6076	spring	Landrace (AG5)
WATDE0249	lan	WWWSC00052	WATDE0249	37940	1190114 - 2	0	Yugoslavia	Rogatica, Sarajevo, Bosnia	43.7989	19.0042	spring	Landrace (AG5)
WATDE0250	mod	WWWSC00641	WATDE0250	37941	1190115 - 1	0	Yugoslavia	Napolica, Dalmatia	43.637	16.5927	spring	Landrace (AG6)
WATDE0252	mod	WWWSC00737	WATDE0252	37943	1190116 - 1	0	Spain	La Linea district, Seville	36.1673	-5.3473	spring	Landrace (AG6)
WATDE0253	mod	WWWSC00735	WATDE0253	37944	1190117 - 1	0	Spain	Villar del Arzobispo	39.7341	-0.8285	spring	Landrace (AG6)
WATDE0254	lan	WWWSC00599	WATDE0254	37945	1190118 - 1	0	Portugal	Vila Franca de Xira	38.9425	-8.9717	winter	Landrace (AG2)
WATDE0255	lan	WWWSC00574	WATDE0255	37946	1190119 - 1	0	India	Pusa, Bihar	25.9776	85.6489	winter	Landrace (AG2)
WATDE0257	mod	WWWSC00537	WATDE0257	37948	1190120 - 1	0	Australia	/	-35.3079	149.113	spring	Landrace (AG5)
WATDE0258	mod	WWWSC00362	WATDE0258	37949	1190121 - 1	0	Australia	/	-35.3079	149.113	spring	Landrace (AG6)
WATDE0259	lan	WWWSC00363	WATDE0259	37950	1190122 - 1	0	Australia	/	-35.3079	149.113	spring	Landrace (AG5)
WATDE0260	lan	WWWSC00364	WATDE0260	37951	1190123 - 1	0	Australia	/	-35.3079	149.113	spring	Landrace (AG5)
WATDE0262	mod	WWWSC00251	WATDE0262	37953	1190124 - 1	0	India	Sharigh, Baluchistan	30.1904	67.7093	spring	Landrace (AG5)
WATDE0263	lan	WWWSC00768	WATDE0263	37954	1190125 - 1	0	India	Gorakhpur Govt. Agril. Farm, United Provinces	26.763	83.3819	spring	Landrace (AG5)
WATDE0264	mod	WWWSC00096	WATDE0264	37957	1190128 - 1	0	India	Baluchistan	33.684	73.116	spring	Landrace (AG2)
WATDE0266	mod	WWWSC00459	WATDE0266	37959	1190129 - 1	0	India	Sakrand, Sind	26.1394	68.2703	spring	Landrace (AG2)
WATDE0268	lan	WWWSC00722	WATDE0268	37961	1190130 - 1	0	Spain	Arcediano, Salamanca	41.1058	-5.5585	spring	Landrace (AG6)
WATDE0270	lan	WWWSC00733	WATDE0270	37963	1190131 - 1	0	Spain	San Muñoz, Salamanca	40.7834	-6.1273	winter	Landrace (AG2)
WATDE0271	lan	WWWSC00360	WATDE0271	37964	1190132 - 1	0	Australia	/	-35.3079	149.113	spring	Landrace (AG5)
WATDE0272	mod	WWWSC00361	WATDE0272	37965	1190133 - 1	0	Australia	/	-35.3079	149.113	spring	Landrace (AG6)
WATDE0273	mod	WWWSC00305	WATDE0273	37966	1190134 - 1	0	Australia	/	-35.3079	149.113	spring	Landrace (AG2)
WATDE0275	mod	WWWSC00115	WATDE0275	37968	1190135 - 1	0	Australia	/	-35.3079	149.113	spring	Landrace (AG6)
WATDE0276	mod	WWWSC00530	WATDE0276	37969	1190136 - 1	0	Australia	/	-35.3079	149.113	spring	Landrace (AG6)
WATDE0277	mod	WWWSC00209	WATDE0277	37970	1190137 - 1	0	Australia	/	-35.3079	149.113	spring	Landrace (AG5)
WATDE0278	mod	WWWSC00528	WATDE0278	37971	1190138 - 1	0	Australia	/	-35.3079	149.113	spring	Landrace (AG6)
WATDE0280	lan	WWWSC00742	WATDE0280	37974	1190140 - 1	0	Turkey	/	39.9344	32.8182	spring	Landrace (AG7)
WATDE0281	mod	WWWSC00688	WATDE0281	37976	1190142 - 1	0	Morocco	Granja Agricola, Quebdana, Melilla	35.3147	-2.9547	winter	Landrace (AG2)
WATDE0282	mod	WWWSC00622	WATDE0282	37977	1190143 - 1	0	Spain	E side of "La Virgen de la Peña", Huelva	37.5741	-6.7538	spring	Landrace (AG6)
WATDE0284	mod	WWWSC00335	WATDE0284	37979	1190144 - 1	0	Spain	Navarre	42.716	-1.6731	spring	Landrace (AG2)
WATDE0285	lan	WWWSC00480	WATDE0285	37981	1190146 - 1	0	Spain	Navarre	42.716	-1.6731	spring	Landrace (AG6)
WATDE0286	mod	WWWSC00583	WATDE0286	37982	1190147 - 1	0	Iraq	Baqubah	33.7531	44.609	spring	Landrace (AG6)
WATDE0287	mod	WWWSC00365	WATDE0287	37983	1190148 - 1	0	Australia	/	-35.3079	149.113	winter	Landrace (AG2)
WATDE0288	mod	WWWSC00408	WATDE0288	37985	1190150 - 1	0	United Kingdom	/	51.5078	-0.1277	spring	Landrace (AG2)
WATDE0290	mod	WWWSC00699	WATDE0290	37987	1190151 - 1	0	Portugal	Ourique	37.6521	-8.2243	spring	Landrace (AG2)
WATDE0291	mod	WWWSC00178	WATDE0291	37988	1190152 - 1	0	Portugal	Indonha a Nova	39.9002	-7.2134	spring	Landrace (AG6)
WATDE0292	mod	WWWSC00183	WATDE0292	37989	1190153 - 1	0	Portugal	Castro Verde	52.2597	21.0415	spring	Landrace (AG6)
WATDE0293	lan	WWWSC00475	WATDE0293	37990	1190154 - 1	0	Portugal	Coruche	38.9605	-8.5258	spring	Landrace (AG5)
WATDE0294	lan	WWWSC00022	WATDE0294	37991	1190155 - 1	0	Portugal	Frontiera	39.0559	-7.6473	spring	Landrace (AG6)
WATDE0296	lan	WWWSC00505	WATDE0296	37993	1190156 - 1	0	Yugoslavia	Martijanec, Varazdin, Croatia	46.2716	16.528	spring	Landrace (AG5)
WATDE0298	lan	WWWSC00508	WATDE0298	37995	1190157 - 1	0	Yugoslavia	Somod Golica, Zagreb, Croatia	45.8157	15.987	spring	Landrace (AG7)
WATDE0299	lan	WWWSC00321	WATDE0299	37996	1190158 - 1	0	Greece	Near Caterina	37.9822	23.7517	winter	Landrace (AG2)
WATDE0301	lan	WWWSC00309	WATDE0301	37998	1190159 - 1	0	Bulgaria	Elena	42.9287	25.8767	winter	Landrace (AG2)
WATDE0303	mod	WWWSC00809	WATDE0303	38001	1190162 - 1	0	Spain	/	40.3276	-3.7965	spring	Landrace (AG2)
WATDE0304	lan	WWWSC00726	WATDE0304	38002	1190163 - 1	0	Spain	Sodupe (Gueñes), Vizcaya	43.2001	-3.0486	spring	Landrace (AG2)
WATDE0305	mod	WWWSC00322	WATDE0305	38003	1190164 - 1	0	India	United Provinces	26.7256	84.2297	spring	Landrace (AG2)
WATDE0306	lan	WWWSC00323	WATDE0306	38004	1190165 - 1	0	India	Bhutan	27.5052	89.7181	spring	Landrace (AG2)
WATDE0308	lan	WWWSC00240	WATDE0308	38006	1190166 - 3	0	India	Saharanpur, United Provinces	26.8734	80.2525	spring	Landrace (AG5)
WATDE0310	mod	WWWSC00390	WATDE0310	38008	1190167 - 1	0	India	Khudadad, Nasirabad, Baluchistan	30.8316	66.4826	spring	Landrace (AG2)
WATDE0312	lan	WWWSC00005	WATDE0312	38010	1190168 - 1	0	China	Hills nr. Chungking, Sichuan	29.5147	106.605	spring	Landrace (AG7)
WATDE0313	lan	WWWSC00549	WATDE0313	38011	1190169 - 1	0	China	Hills nr. Chungking, Sichuan	29.5147	106.605	spring	Landrace (AG5)
WATDE0315	lan	WWWSC00550	WATDE0315	38013	1190170 - 1	0	China	Tzeliutsing, 100 miles W. of Chungking, Sichuan	29.5147	106.605	spring	Landrace (AG1)
WATDE0316	lan	WWWSC00367	WATDE0316	38014	1190171 - 1	0	China	Tzeliutsing, 100 miles W. of Chungking, Sichuan	29.5147	106.605	spring	Landrace (AG5)
WATDE0317	lan	WWWSC00568	WATDE0317	38015	1190172 - 2	0	India	United Provinces	26.8734	80.2525	spring	Landrace (AG6)
WATDE0318	lan	WWWSC00533	WATDE0318	38016	1190173 - 1	0	Australia	/	-35.3079	149.113	spring	Landrace (AG6)
WATDE0319	lan	WWWSC00571	WATDE0319	38017	1190174 - 1	0	India	Bharthna market, Etawah, United Provinces	26.8734	80.2525	spring	Landrace (AG6)
WATDE0321	mod	WWWSC00654	WATDE0321	38019	1190175 - 2	0	China	/	39.6572	116.251	winter	Landrace (AG2)
WATDE0323	mod	WWWSC00810	WATDE0323	38021	1190176 - 1	0	Afghanistan	/	34.5084	68.9417	spring	Landrace (AG3)
WATDE0324	mod	WWWSC00175	WATDE0324	38022	1190177 - 1	0	Portugal	/	38.7638	-9.1246	spring	Landrace (AG6)
WATDE0325	mod	WWWSC00642	WATDE0325	38023	1190178 - 3	0	Yugoslavia	Sinj, Dalmatia	43.7048	16.6379	spring	Landrace (AG2)
WATDE0328	mod	WWWSC00664	WATDE0328	38026	1190179 - 1	0	Greece	Karditza & Trikkala districts of Thessalia	39.3643	21.9212	winter	Landrace (AG2)
WATDE0329	lan	WWWSC00709	WATDE0329	38027	1190180 - 1	0	Spain	Navarre	42.716	-1.6731	spring	Landrace (AG7)
WATDE0331	lan	WWWSC00402	WATDE0331	38030	1190182 - 1	0	Poland	/	52.2597	21.0415	winter	Landrace (AG5)
WATDE0332	lan	WWWSC00773	WATDE0332	38031	1190183 - 1	0	Poland	/	52.2597	21.0415	spring	Landrace (AG5)
WATDE0333	lan	WWWSC00774	WATDE0333	38032	1190184 - 1	0	Poland	/	52.2597	21.0415	spring	Landrace (AG5)
WATDE0334	mod	WWWSC00780	WATDE0334	38033	1190185 - 1	0	Italy	/	41.9262	12.4175	winter	Landrace (AG3)
WATDE0335	lan	WWWSC00466	WATDE0335	38034	1190186 - 1	0	Italy	/	41.9262	12.4175	spring	Landrace (AG2)
WATDE0336	lan	WWWSC00685	WATDE0336	38035	1190187 - 1	0	Italy	/	41.9262	12.4175	spring	Landrace (AG7)
WATDE0337	mod	WWWSC00317	WATDE0337	38036	1190188 - 4	0	France	/	48.859	2.3476	spring	Landrace (AG2)
WATDE0339	mod	WWWSC00374	WATDE0339	38038	1190189 - 2	0	France	/	48.859	2.3476	spring	Landrace (AG2)
WATDE0340	mod	WWWSC00376	WATDE0340	38039	1190190 - 1	0	France	/	48.859	2.3476	winter	Landrace (AG2)
WATDE0342	mod	WWWSC00375	WATDE0342	38041	1190191 - 1	0	France	/	48.859	2.3476	winter	Landrace (AG2)
WATDE0343	lan	WWWSC00663	WATDE0343	38042	1190192 - 1	0	France	/	48.859	2.3476	spring	Landrace (AG7)
WATDE0344	mod	WWWSC00320	WATDE0344	38043	1190193 - 1	0	France	/	48.859	2.3476	spring	Landrace (AG2)
WATDE0345	mod	WWWSC00319	WATDE0345	38044	1190194 - 1	0	France	/	48.859	2.3476	spring	Landrace (AG2)
WATDE0346	mod	WWWSC00383	WATDE0346	38045	1190195 - 1	0	India	Sikkim	27.4878	88.4039	winter	Landrace (AG2)
WATDE0347	mod	WWWSC00378	WATDE0347	38046	1190196 - 4	0	India	/	28.689	77.2378	winter	Landrace (AG2)
WATDE0348	mod	WWWSC00386	WATDE0348	38047	1190197 - 1	0	India	United Provinces	26.8734	80.2525	spring	Landrace (AG2)
WATDE0350	lan	WWWSC00671	WATDE0350	38049	1190198 - 3	0	India	United Provinces	26.8734	80.2525	spring	Landrace (AG3)
WATDE0352	mod	WWWSC00373	WATDE0352	38052	1190200 - 1	0	France	/	48.859	2.3476	winter	Landrace (AG2)
WATDE0353	lan	WWWSC00612	WATDE0353	38053	1190201 - 1	0	Spain	Ispaster, Vizcaya	43.3619	-2.5437	spring	Landrace (AG2)
WATDE0354	lan	WWWSC00614	WATDE0354	38054	1190202 - 1	0	Spain	Navarre	42.716	-1.6731	spring	Landrace (AG2)
WATDE0355	mod	WWWSC00391	WATDE0355	38055	1190203 - 1	0	India	Srinagor, Kashmir	34.1061	74.8061	winter	Landrace (AG5)
WATDE0356	lan	WWWSC00384	WATDE0356	38056	1190204 - 3	0	India	Sikkim	27.4878	88.4039	spring	Landrace (AG5)
WATDE0358	lan	WWWSC00379	WATDE0358	38058	1190205 - 1	0	India	Balawah, Sibi, Baluchistan	29.5458	67.8739	spring	Landrace (AG5)
WATDE0359	lan	WWWSC00771	WATDE0359	38059	1190206 - 1	0	India	Supasangaon, Fatehpore, United Provinces	26.8734	80.2525	spring	Landrace (AG5)
WATDE0361	lan	WWWSC00254	WATDE0361	38061	1190207 - 2	0	Iran	Gesian, 30km SW of Urmia	37.6869	45.4022	spring	Landrace (AG3)
WATDE0363	lan	WWWSC00224	WATDE0363	38063	1190208 - 1	0	India	Margnzani, Sibi, Baluchistan	29.556	67.8746	spring	Landrace (AG3)
WATDE0365	lan	WWWSC00382	WATDE0365	38066	1190210 - 1	0	India	United Provinces	26.8734	80.2525	spring	Landrace (AG2)
WATDE0366	lan	WWWSC00661	WATDE0366	38067	1190211 - 3	0	France	/	48.859	2.3476	spring	Landrace (AG2)
WATDE0368	mod	WWWSC00468	WATDE0368	38069	1190212 - 1	0	Morocco	Tismatinaum, Ghomara	36.7506	-3.2506	spring	Landrace (AG6)
WATDE0369	lan	WWWSC00467	WATDE0369	38070	1190213 - 1	0	Morocco	Bouskoura, Casablanca	33.4584	-7.6346	spring	Landrace (AG5)
WATDE0370	lan	WWWSC00588	WATDE0370	38071	1190214 - 1	0	Morocco	Mazagan district	33.2355	-8.498	spring	Landrace (AG7)
WATDE0371	mod	WWWSC00589	WATDE0371	38072	1190215 - 1	0	Morocco	Oulad-Ed Hadj, Fez	34.0712	-4.9908	spring	Landrace (AG6)
WATDE0372	mod	WWWSC00591	WATDE0372	38074	1190217 - 1	0	Morocco	Zenatas, Shaouia	33.1131	-7.2782	spring	Landrace (AG6)
WATDE0373	mod	WWWSC00624	WATDE0373	38077	1190220 - 1	0	Spain	Valdepeñas district in heart of "La Mancha" wine district	38.7643	-3.3879	spring	Landrace (AG6)
WATDE0374	lan	WWWSC00625	WATDE0374	38078	1190221 - 1	0	Spain	Vallodolid district	41.6406	-4.7354	spring	Landrace (AG6)
WATDE0375	mod	WWWSC00559	WATDE0375	38079	1190222 - 1	0	Crete	Plain of Messara, Candia district	35.3381	25.1349	spring	Landrace (AG6)
WATDE0377	mod	WWWSC00811	WATDE0377	38083	1190225 - 1	0	Canary Islands	Grand Canary	27.9188	-15.6169	spring	Landrace (AG7)
WATDE0378	mod	WWWSC00626	WATDE0378	38084	1190226 - 1	0	Spain	Villar del Arzobispo	39.7341	-0.8285	spring	Landrace (AG6)
WATDE0379	lan	WWWSC00406	WATDE0379	38085	1190227 - 3	0	Spain	/	40.3276	-3.7965	spring	Landrace (AG2)
WATDE0381	lan	WWWSC00618	WATDE0381	38087	1190228 - 1	0	Spain	Tierra de Canpos	42.0389	-5.0234	spring	Landrace (AG6)
WATDE0382	lan	WWWSC00707	WATDE0382	38088	1190229 - 1	0	Portugal	Loulé	37.1397	-8.0203	spring	Landrace (AG7)
WATDE0383	lan	WWWSC00603	WATDE0383	38089	1190230 - 1	0	Portugal	Ferreira do Alemtejo	38.059	-8.1122	spring	Landrace (AG7)
WATDE0385	lan	WWWSC00674	WATDE0385	38092	1190232 - 1	0	India	Pusa,Bihar	25.9789	85.65	spring	Landrace (AG3)
WATDE0386	lan	WWWSC00812	WATDE0386	38093	1190233 - 1	0	India	Punjab	30.763	75.0681	spring	Landrace (AG5)
WATDE0387	lan	WWWSC00294	WATDE0387	38094	1190234 - 3	0	Yugoslavia	Rogatica, Sarajevo, Bosnia	43.7989	19.0042	winter	Landrace (AG5)
WATDE0389	lan	WWWSC00223	WATDE0389	38096	1190235 - 3	0	Greece	Vissinia of Kastoria	40.6227	21.312	winter	Landrace (AG5)
WATDE0391	lan	WWWSC00222	WATDE0391	38098	1190236 - 1	0	Greece	Ano Nevoliany, Florina	40.767	21.4894	winter	Landrace (AG5)
WATDE0392	lan	WWWSC00260	WATDE0392	38099	1190237 - 2	0	Iran	Burujird	33.8993	48.7482	spring	Landrace (AG4)
WATDE0394	lan	WWWSC00019	WATDE0394	38103	1190240 - 2	0	Iran	Tehran district	35.6942	51.383	spring	Landrace (AG3)
WATDE0396	lan	WWWSC00011	WATDE0396	38105	1190241 - 2	0	India	Gonda, United Provinces	27.14	81.9545	spring	Landrace (AG3)
WATDE0397	lan	WWWSC00250	WATDE0397	38106	1190242 - 1	0	India	Jhapora, Mainpuri, United Provinces	26.8734	80.2525	spring	Landrace (AG3)
WATDE0399	mod	WWWSC00158	WATDE0399	38108	1190243 - 2	0	India	Nagla Parroli, Mainpuri, United Provinces	26.8734	80.2525	spring	Landrace (AG3)
WATDE0401	lan	WWWSC00670	WATDE0401	38110	1190244 - 2	0	India	Kishunpore, Fatehpore, United Provinces	26.8734	80.2525	spring	Landrace (AG1)
WATDE0403	mod	WWWSC00531	WATDE0403	38112	1190245 - 1	0	Australia	/	-35.3079	149.113	spring	Landrace (AG6)
WATDE0404	mod	WWWSC00570	WATDE0404	38114	1190247 - 1	0	India	Chachezai, Shorarud, Baluchistan	28.9015	64.4007	spring	Landrace (AG3)
WATDE0405	lan	WWWSC00813	WATDE0405	38115	1190248 - 1	0	India	Vharhtna market, Etawah, United Provinces	26.8734	80.2525	spring	Landrace (AG3)
WATDE0407	lan	WWWSC00452	WATDE0407	38117	1190249 - 1	0	India	Achaloa market, Etawah, United Provinces	26.8734	80.2525	spring	Landrace (AG6)
WATDE0408	lan	WWWSC00547	WATDE0408	38118	1190250 - 1	0	China	/	39.6572	116.251	spring	Landrace (AG6)
WATDE0409	mod	WWWSC00538	WATDE0409	38119	1190251 - 1	0	Australia	/	-35.3079	149.113	spring	Landrace (AG6)
WATDE0410	mod	WWWSC00525	WATDE0410	38120	1190252 - 1	0	Algeria	/	36.7384	3.1485	spring	Landrace (AG6)
WATDE0411	mod	WWWSC00592	WATDE0411	38121	1190253 - 1	0	Morocco	Buhash-ash, Beni Ufrah, Rif	35.0779	-4.3932	spring	Landrace (AG6)
WATDE0412	lan	WWWSC00740	WATDE0412	38123	1190255 - 1	0	Tunisia	Medjez-el-Bab	36.6483	9.6118	spring	Landrace (AG6)
WATDE0413	mod	WWWSC00632	WATDE0413	38124	1190256 - 1	0	Tunisia	Garn Alfaya	36.1435	8.4955	winter	Landrace (AG6)
WATDE0415	mod	WWWSC00633	WATDE0415	38126	1190257 - 2	0	Tunisia	Tataouine	32.923	10.4432	spring	Landrace (AG6)
WATDE0417	lan	WWWSC00691	WATDE0417	38128	1190258 - 1	0	Morocco	Tismatinaum, Ghomara	36.7506	-3.2506	spring	Landrace (AG7)
WATDE0419	mod	WWWSC00593	WATDE0419	38130	1190259 - 1	0	Morocco	Rehamna, Marrakech	32.2126	-7.9043	spring	Landrace (AG6)
WATDE0420	mod	WWWSC00542	WATDE0420	38131	1190260 - 1	0	Canary Islands	Grand Canary	27.9188	-15.6169	spring	Landrace (AG6)
WATDE0421	mod	WWWSC00543	WATDE0421	38132	1190261 - 1	0	Canary Islands	Grand Canary	27.9188	-15.6169	spring	Landrace (AG6)
WATDE0422	mod	WWWSC00544	WATDE0422	38133	1190262 - 1	0	Canary Islands	Grand Canary	27.9188	-15.6169	spring	Landrace (AG6)
WATDE0423	mod	WWWSC00545	WATDE0423	38134	1190263 - 1	0	Canary Islands	Grand Canary	27.9188	-15.6169	spring	Landrace (AG6)
WATDE0424	lan	WWWSC00778	WATDE0424	38136	1190265 - 1	0	Canary Islands	Teneriffe	28.2681	-16.6327	spring	Landrace (AG7)
WATDE0425	lan	WWWSC00710	WATDE0425	38137	1190266 - 1	0	Spain	Navarre	42.716	-1.6731	spring	Landrace (AG7)
WATDE0426	lan	WWWSC00795	WATDE0426	38138	1190267 - 1	0	Spain	Navarre	42.716	-1.6731	spring	Landrace (AG7)
WATDE0427	lan	WWWSC00717	WATDE0427	38139	1190268 - 1	0	Spain	Navarre	42.716	-1.6731	spring	Landrace (AG7)
WATDE0428	lan	WWWSC00347	WATDE0428	38140	1190269 - 1	0	Spain	Navarre	42.716	-1.6731	spring	Landrace (AG7)
WATDE0429	lan	WWWSC00611	WATDE0429	38141	1190270 - 1	0	Spain	Navarre	42.716	-1.6731	spring	Landrace (AG7)
WATDE0430	lan	WWWSC00184	WATDE0430	38142	1190271 - 1	0	Spain	Navarre	42.716	-1.6731	spring	Landrace (AG7)
WATDE0431	lan	WWWSC00730	WATDE0431	38143	1190272 - 1	0	Spain	Navarre	42.716	-1.6731	spring	Landrace (AG6)
WATDE0432	mod	WWWSC00731	WATDE0432	38145	1190274 - 1	0	Spain	Granada zone	37.1609	-3.6076	spring	Landrace (AG7)
WATDE0433	lan	WWWSC00713	WATDE0433	38146	1190275 - 1	0	Spain	Navarre	42.716	-1.6731	spring	Landrace (AG7)
WATDE0434	lan	WWWSC00714	WATDE0434	38147	1190276 - 1	0	Spain	Navarre	42.716	-1.6731	spring	Landrace (AG6)
WATDE0435	lan	WWWSC00349	WATDE0435	38148	1190277 - 1	0	Spain	Valverde del Camino, Huelva	37.5741	-6.7538	spring	Landrace (AG2)
WATDE0436	mod	WWWSC00187	WATDE0436	38149	1190278 - 2	0	Spain	Cadiz	36.5282	-6.2878	winter	Landrace (AG5)
WATDE0438	lan	WWWSC00814	WATDE0438	38151	1190279 - 1	0	Spain	Navarre	42.716	-1.6731	spring	Landrace (AG5)
WATDE0439	mod	WWWSC00610	WATDE0439	38152	1190280 - 1	0	Spain	Valtrena, Navarre	42.716	-1.6731	spring	Landrace (AG6)
WATDE0440	lan	WWWSC00140	WATDE0440	38153	1190281 - 1	0	Greece	Karditza & Trikkala districts of Thessalia	39.3643	21.9212	spring	Landrace (AG6)
WATDE0441	mod	WWWSC00139	WATDE0441	38154	1190282 - 1	0	Greece	Corfu Island	39.6242	19.9218	spring	Landrace (AG6)
WATDE0442	mod	WWWSC00565	WATDE0442	38155	1190283 - 1	0	Greece	Tripolis district, Peloponese	37.5101	22.3708	spring	Landrace (AG6)
WATDE0443	mod	WWWSC00665	WATDE0443	38156	1190284 - 1	0	Greece	Corfu Island	39.6242	19.9218	spring	Landrace (AG6)
WATDE0444	mod	WWWSC00666	WATDE0444	38157	1190285 - 1	0	Greece	Kalvarita district, Peloponese	38.033	22.1114	spring	Landrace (AG2)
WATDE0445	mod	WWWSC00566	WATDE0445	38158	1190286 - 1	0	Greece	Cyclades (received from Syra)	37.4369	24.9151	spring	Landrace (AG6)
WATDE0446	mod	WWWSC00560	WATDE0446	38159	1190287 - 1	0	Crete	Nerokourou, Cydonia, Canea	35.4889	24.0323	spring	Landrace (AG6)
WATDE0448	lan	WWWSC00558	WATDE0448	38161	1190288 - 1	0	Crete	Galagado, Akroteri, Canea	35.5125	24.0247	winter	Landrace (AG6)
WATDE0449	mod	WWWSC00779	WATDE0449	38162	1190289 - 1	0	Crete	Plain of Messara, Candia district	35.3381	25.1349	spring	Landrace (AG6)
WATDE0450	mod	WWWSC00134	WATDE0450	38163	1190290 - 1	0	Crete	Kaina, Apokoronna, Canea	35.4059	24.1645	spring	Landrace (AG6)
WATDE0451	lan	WWWSC00636	WATDE0451	38166	1190293 - 1	0	Turkey	Seraikeuy	37.9358	29.1226	spring	Landrace (AG7)
WATDE0452	mod	WWWSC00637	WATDE0452	38167	1190294 - 1	0	Turkey	Koyoun Dere, Menemen, 15 miles N of Izmir	38.412	27.2967	spring	Landrace (AG6)
WATDE0453	mod	WWWSC00638	WATDE0453	38168	1190295 - 1	0	Turkey	Tourbali	38.1926	27.3618	spring	Landrace (AG6)
WATDE0454	mod	WWWSC00027	WATDE0454	38169	1190296 - 1	0	Turkey	Kirk Agach, 50 miles NE of Izmir	38.4337	27.1779	spring	Landrace (AG6)
WATDE0455	mod	WWWSC00028	WATDE0455	38170	1190297 - 1	0	Turkey	Koyoun Dere, Menemen, 15 miles N of Izmir	38.4278	27.1634	spring	Landrace (AG6)
WATDE0456	lan	WWWSC00277	WATDE0456	38171	1190298 - 1	0	Turkey	Seraikeuy	37.9358	29.1226	spring	Landrace (AG4)
WATDE0457	lan	WWWSC00743	WATDE0457	38174	1190301 - 1	0	Turkey	Seraikeuy	37.9358	29.1226	spring	Landrace (AG2)
WATDE0459	mod	WWWSC00024	WATDE0459	38176	1190302 - 1	0	Syria	Banks of Euphrates	33.5216	36.2424	spring	Landrace (AG4)
WATDE0460	mod	WWWSC00025	WATDE0460	38177	1190303 - 1	0	Syria	W of Aleppo	36.2008	37.1589	spring	Landrace (AG4)
WATDE0461	lan	WWWSC00631	WATDE0461	38178	1190304 - 1	0	Syria	Bosra Eski Sham	32.5181	36.4814	spring	Landrace (AG6)
WATDE0462	lan	WWWSC00794	WATDE0462	38180	1190306 - 1	0	Iraq	Mosul	36.3564	43.1486	spring	Landrace (AG6)
WATDE0463	lan	WWWSC00326	WATDE0463	38181	1190307 - 1	0	Iran	Abbas Abad, Shahriar district, SW of Tehran	35.7166	51.3869	/	Landrace (AG7)
WATDE0465	lan	WWWSC00461	WATDE0465	38184	1190309 - 1	0	Iran	Zarand, 95 miles S of Tehran, nr Kum	37.5605	45.0594	winter	Landrace (AG5)
WATDE0467	lan	WWWSC00462	WATDE0467	38186	1190310 - 1	0	Iran	Yaft Abad, Savoj-Bolak district, Tehran province	35.6665	51.3188	/	Landrace (AG5)
WATDE0469	lan	WWWSC00327	WATDE0469	38188	1190311 - 1	0	Iran	Rasht, Caspian shore	37.279	49.5898	/	Landrace (AG7)
WATDE0471	lan	WWWSC00328	WATDE0471	38190	1190312 - 1	0	Iran	Khomein Kamareh, 45 miles W of Sultanabad	33.6387	50.0713	/	Landrace (AG7)
WATDE0474	lan	WWWSC00116	WATDE0474	38194	1190314 - 1	0	China	Wuchang	30.5648	114.344	spring	Landrace (AG6)
WATDE0476	lan	WWWSC00436	WATDE0476	38196	1190315 - 2	0	China	Wuchang	30.5648	114.344	spring	Landrace (AG5)
WATDE0477	lan	WWWSC00059	WATDE0477	38197	1190316 - 1	0	China	Linsiang, Sinti	25.6901	111.908	spring	Landrace (AG1)
WATDE0479	mod	WWWSC00551	WATDE0479	38199	1190317 - 1	0	China	Wuchang	30.5648	114.344	spring	Landrace (AG1)
WATDE0481	mod	WWWSC00117	WATDE0481	38201	1190318 - 1	0	China	Yuan Hsing Shen General Store, Tung An Men Ta-Chieh, Peking. Grown S metropolitan area	39.9333	116.298	spring	Landrace (AG1)
WATDE0482	lan	WWWSC00212	WATDE0482	38202	1190319 - 1	0	China	Mukden	41.8203	123.395	winter	Landrace (AG1)
WATDE0484	mod	WWWSC00213	WATDE0484	38204	1190320 - 3	0	China	Wuchang	30.5648	114.344	winter	Landrace (AG2)
WATDE0486	lan	WWWSC00118	WATDE0486	38206	1190321 - 1	0	China	Hankow	30.4161	114.321	spring	Landrace (AG7)
WATDE0487	lan	WWWSC00214	WATDE0487	38207	1190322 - 1	0	China	Tsingshih (Large producing centre NW of Tungting lake)	28.9264	112.258	winter	Landrace (AG7)
WATDE0488	mod	WWWSC00215	WATDE0488	38208	1190323 - 1	0	China	Yu Mao Grain Store, Hatamen Street, Peking. Ggown in city suburbs	39.9333	116.298	winter	Landrace (AG2)
WATDE0489	mod	WWWSC00173	WATDE0489	38211	1190326 - 1	0	Palestine	/	31.7673	35.2052	spring	Landrace (AG6)
WATDE0490	lan	WWWSC00271	WATDE0490	38212	1190327 - 1	0	Palestine	/	31.7673	35.2052	spring	Landrace (AG6)
WATDE0492	lan	WWWSC00561	WATDE0492	38214	1190328 - 1	0	Egypt	/	30.0035	31.2598	spring	Landrace (AG5)
WATDE0494	lan	WWWSC00441	WATDE0494	38216	1190329 - 2	0	Egypt	/	30.0035	31.2598	winter	Landrace (AG5)
WATDE0496	lan	WWWSC00442	WATDE0496	38218	1190330 - 1	0	Egypt	/	30.0035	31.2598	winter	Landrace (AG5)
WATDE0498	lan	WWWSC00426	WATDE0498	38220	1190331 - 2	0	Brazil	/	-15.7625	-47.9596	winter	Landrace (AG5)
WATDE0500	lan	WWWSC00518	WATDE0500	38222	1190332 - 1	0	unknown	/	/	/	winter	Landrace (AG5)
WATDE0501	lan	WWWSC00519	WATDE0501	38223	1190333 - 1	0	unknown	/	/	/	winter	Landrace (AG5)
WATDE0502	lan	WWWSC00815	WATDE0502	38224	1190334 - 1	0	unknown	/	/	/	spring	Landrace (AG5)
WATDE0503	lan	WWWSC00200	WATDE0503	38225	1190335 - 1	0	unknown	/	/	/	spring	Landrace (AG5)
WATDE0504	mod	WWWSC00377	WATDE0504	38226	1190336 - 1	0	Hungary	/	47.5125	19.0111	winter	Landrace (AG2)
WATDE0505	lan	WWWSC00445	WATDE0505	38227	1190337 - 1	0	Hungary	/	47.5125	19.0111	spring	Landrace (AG5)
WATDE0507	lan	WWWSC00446	WATDE0507	38229	1190338 - 1	0	Hungary	/	47.5125	19.0111	spring	Landrace (AG5)
WATDE0509	lan	WWWSC00701	WATDE0509	38231	1190339 - 1	0	Portugal	Ferreira do Alemtejo	38.059	-8.1122	spring	Landrace (AG6)
WATDE0510	lan	WWWSC00721	WATDE0510	38232	1190340 - 1	0	Spain	Navarre	42.716	-1.6731	spring	Landrace (AG6)
WATDE0511	lan	WWWSC00607	WATDE0511	38233	1190341 - 1	0	Spain	/	40.3276	-3.7965	spring	Landrace (AG5)
WATDE0512	lan	WWWSC00185	WATDE0512	38234	1190342 - 2	0	Spain	Navarre	42.716	-1.6731	winter	Landrace (AG7)
WATDE0513	lan	WWWSC00484	WATDE0513	38235	1190343 - 2	0	Spain	Gordejuela, Vizcaya	43.1785	-3.0768	winter	Landrace (AG7)
WATDE0515	mod	WWWSC00190	WATDE0515	38237	1190344 - 1	0	Spain	Uterga, 18km from Pamplona, Navarre	42.716	-1.6731	spring	Landrace (AG6)
WATDE0516	lan	WWWSC00430	WATDE0516	38238	1190345 - 1	0	Bulgaria	Kozelovo (Roustchouk)	43.8349	25.9522	spring	Landrace (AG5)
WATDE0518	lan	WWWSC00431	WATDE0518	38240	1190346 - 1	0	Bulgaria	Konstandenez	42.7663	23.2482	spring	Landrace (AG5)
WATDE0519	lan	WWWSC00432	WATDE0519	38241	1190347 - 1	0	Bulgaria	Tsvetkovitzi (Gabravo)	42.8748	25.3222	spring	Landrace (AG5)
WATDE0520	lan	WWWSC00433	WATDE0520	38242	1190348 - 1	0	Bulgaria	Dere (? Derekoj, Shumen)	43.2645	26.9452	spring	Landrace (AG5)
WATDE0521	lan	WWWSC00512	WATDE0521	38244	1190351 - 1	0	Yugoslavia	Cajetina, c.30km SW of Uzice, Bosnia	43.8531	19.8462	spring	Landrace (AG5)
WATDE0522	lan	WWWSC00296	WATDE0522	38246	1190353 - 1	0	Yugoslavia	Broko, Tuzla, Bosnia	44.5385	18.6733	spring	Landrace (AG5)
WATDE0524	lan	WWWSC00513	WATDE0524	38248	1190354 - 1	0	Yugoslavia	Visegrad, Sarajevo, Bosnia	43.8586	18.4309	spring	Landrace (AG5)
WATDE0526	lan	WWWSC00414	WATDE0526	38251	1190356 - 1	0	Yugoslavia	Bukovica, Dalmatia	43.6022	20.213	spring	Landrace (AG5)
WATDE0527	mod	WWWSC00199	WATDE0527	38252	1190357 - 2	0	Yugoslavia	Sinj, Dalmatia	43.7056	16.6394	spring	Landrace (AG6)
WATDE0529	lan	WWWSC00816	WATDE0529	38254	1190358 - 1	0	Yugoslavia	Napolica, Dalmatia	43.637	16.5927	spring	Landrace (AG7)
WATDE0531	lan	WWWSC00514	WATDE0531	38256	1190359 - 1	0	Yugoslavia	Napolica, Dalmatia	43.637	16.5927	spring	Landrace (AG5)
WATDE0532	lan	WWWSC00515	WATDE0532	38258	1190361 - 1	0	Yugoslavia	Donja Banica	45.9125	15.8423	spring	Landrace (AG5)
WATDE0533	lan	WWWSC00053	WATDE0533	38259	1190362 - 1	0	Yugoslavia	Nova Varos	43.4652	19.8106	spring	Landrace (AG5)
WATDE0534	lan	WWWSC00766	WATDE0534	38260	1190363 - 1	0	Yugoslavia	Veliko Hoce	46.4864	15.6463	spring	Landrace (AG7)
WATDE0536	lan	WWWSC00516	WATDE0536	38262	1190364 - 1	0	Yugoslavia	Nova Varos	43.4652	19.8106	spring	Landrace (AG5)
WATDE0537	lan	WWWSC00517	WATDE0537	38263	1190365 - 1	0	Yugoslavia	Kriva Palanka	42.2053	22.3322	spring	Landrace (AG5)
WATDE0538	lan	WWWSC00509	WATDE0538	38264	1190366 - 1	0	Yugoslavia	Veliko Hoce	46.4864	15.6463	spring	Landrace (AG5)
WATDE0539	lan	WWWSC00427	WATDE0539	38265	1190367 - 3	0	Bulgaria	Pleven	43.4144	24.618	spring	Landrace (AG5)
WATDE0540	lan	WWWSC00354	WATDE0540	38266	1190368 - 1	0	Yugoslavia	Zagreb, Croatia	45.8238	15.9808	spring	Landrace (AG5)
WATDE0541	lan	WWWSC00745	WATDE0541	38267	1190369 - 2	0	Yugoslavia	Soblinec, Sv. Ivan Zelina, Croatia	45.8675	16.1511	spring	Landrace (AG7)
WATDE0542	lan	WWWSC00746	WATDE0542	38268	1190370 - 1	0	Yugoslavia	Vidovec, Varazdin, Croatia	46.2909	16.2425	spring	Landrace (AG7)
WATDE0543	lan	WWWSC00051	WATDE0543	38269	1190371 - 2	0	Yugoslavia	Krizevci, Croatia	46.0322	16.5443	winter	Landrace (AG5)
WATDE0544	mod	WWWSC00412	WATDE0544	38270	1190372 - 1	0	Yugoslavia	Sv Ivan Zelina, Croatia	45.9589	16.245	spring	Landrace (AG7)
WATDE0546	lan	WWWSC00680	WATDE0546	38272	1190373 - 1	0	Iran	Khorasan, especially Tabadakhan district, Meshed, Khorasan	36.3047	59.5843	spring	Landrace (AG7)
WATDE0547	lan	WWWSC00325	WATDE0547	38273	1190374 - 2	0	Iran	Transcaspian steppe	36.6277	51.2548	winter	Landrace (AG3)
WATDE0549	lan	WWWSC00263	WATDE0549	38275	1190375 - 1	0	Iran	Banks of Karun, Ahwaz	31.3545	48.6603	spring	Landrace (AG4)
WATDE0550	lan	WWWSC00259	WATDE0550	38276	1190376 - 2	0	Iran	Sari, Mazanderan	36.5628	53.0604	spring	Landrace (AG4)
WATDE0552	lan	WWWSC00257	WATDE0552	38278	1190377 - 1	0	Iran	Transcaspian steppe	36.6277	51.2548	spring	Landrace (AG4)
WATDE0553	lan	WWWSC00165	WATDE0553	38279	1190378 - 1	0	Iran	Bazoar Kermanshah	34.3423	47.0821	spring	Landrace (AG4)
WATDE0555	lan	WWWSC00162	WATDE0555	38281	1190379 - 1	0	Iran	Sar-i-Jam, 40 miles SSE of Meshed, Khorasan	36.3009	59.6021	spring	Landrace (AG4)
WATDE0556	mod	WWWSC00579	WATDE0556	38282	1190380 - 1	0	Iran	Azerbaijan province	37.8971	44.9428	spring	Landrace (AG6)
WATDE0557	lan	WWWSC00154	WATDE0557	38283	1190381 - 1	0	India	Punjab	30.763	75.0681	spring	Landrace (AG7)
WATDE0558	lan	WWWSC00015	WATDE0558	38284	1190382 - 1	0	India	Sakrand, Sind	26.1394	68.2703	spring	Landrace (AG7)
WATDE0560	lan	WWWSC00817	WATDE0560	38286	1190383 - 1	0	Greece	Vissinia of Kastoria	40.6227	21.312	spring	Landrace (AG5)
WATDE0561	lan	WWWSC00443	WATDE0561	38287	1190384 - 1	0	Greece	Ano Nevoliany, Florina	40.767	21.4894	spring	Landrace (AG5)
WATDE0562	lan	WWWSC00627	WATDE0562	38288	1190385 - 2	0	Spain	/	40.3276	-3.7965	winter	Landrace (AG6)
WATDE0563	lan	WWWSC00023	WATDE0563	38289	1190386 - 1	0	Spain	/	40.3276	-3.7965	spring	Landrace (AG7)
WATDE0565	mod	WWWSC00629	WATDE0565	38292	1190388 - 1	0	Spain	/	40.3276	-3.7965	spring	Landrace (AG6)
WATDE0566	mod	WWWSC00600	WATDE0566	38293	1190389 - 1	0	Portugal	Ferriera do Alemtejo	38.059	-8.1122	spring	Landrace (AG6)
WATDE0567	lan	WWWSC00704	WATDE0567	38294	1190390 - 1	0	Portugal	Alcacer do Sol	38.3881	-8.4845	spring	Landrace (AG7)
WATDE0568	lan	WWWSC00705	WATDE0568	38295	1190391 - 1	0	Portugal	Salvaterra de Magos	39.0277	-8.7938	spring	Landrace (AG7)
WATDE0569	mod	WWWSC00763	WATDE0569	38296	1190392 - 1	0	Portugal	Torres Vedras	39.0925	-9.2599	spring	Landrace (AG6)
WATDE0570	mod	WWWSC00180	WATDE0570	38297	1190393 - 1	0	Portugal	Torres Vedras	39.0925	-9.2599	spring	Landrace (AG6)
WATDE0571	lan	WWWSC00764	WATDE0571	38298	1190394 - 1	0	Portugal	Ourique	37.6521	-8.2243	spring	Landrace (AG7)
WATDE0572	lan	WWWSC00702	WATDE0572	38299	1190395 - 1	0	Portugal	Salvaterra de Magos	39.0277	-8.7938	spring	Landrace (AG7)
WATDE0574	lan	WWWSC00060	WATDE0574	38304	1190399 - 1	0	China	Paoning, 150 miles NNW of Chungking, Sichuan	29.4795	106.783	spring	Landrace (AG1)
WATDE0576	lan	WWWSC00061	WATDE0576	38306	1190400 - 1	0	China	T'ungch'uan, 150 miles NW of Chungking, Sichuan	29.5147	106.605	spring	Landrace (AG3)
WATDE0577	mod	WWWSC00601	WATDE0577	38307	1190401 - 1	0	Portugal	Alter do Châo	39.2005	-7.6606	spring	Landrace (AG6)
WATDE0578	lan	WWWSC00220	WATDE0578	38308	1190402 - 1	0	Greece	Ano Nevoliany, Florina	40.767	21.4894	winter	Landrace (AG5)
WATDE0579	lan	WWWSC00272	WATDE0579	38309	1190403 - 1	0	Spain	Arcediano, Salamanca	41.1058	-5.5585	spring	Landrace (AG7)
WATDE0581	lan	WWWSC00020	WATDE0581	38311	1190404 - 2	0	Iran	Tehran district	35.6942	51.383	spring	Landrace (AG4)
WATDE0582	lan	WWWSC00256	WATDE0582	38312	1190405 - 1	0	Iran	Kermanshah	34.3423	47.0821	spring	Landrace (AG4)
WATDE0585	lan	WWWSC00159	WATDE0585	38316	1190407 - 2	0	India	Sharigh, Baluchistan	30.1904	67.7093	spring	Landrace (AG1)
WATDE0586	lan	WWWSC00252	WATDE0586	38317	1190408 - 2	0	India	Srinagor, Kashmir	34.1061	74.8061	winter	Landrace (AG5)
WATDE0588	mod	WWWSC00245	WATDE0588	38319	1190409 - 1	0	India	Gonda, United Provinces	27.14	81.9545	spring	Landrace (AG3)
WATDE0589	lan	WWWSC00249	WATDE0589	38320	1190410 - 1	0	India	Thall, Duki, Loralai	30.1621	68.5835	spring	Landrace (AG5)
WATDE0591	lan	WWWSC00677	WATDE0591	38322	1190411 - 1	0	India	China Kowas, Sharigh, Baluchistan	30.1904	67.7093	spring	Landrace (AG7)
WATDE0592	lan	WWWSC00818	WATDE0592	38323	1190412 - 1	0	India	Khaga, Fatehpore, United Provinces	26.8734	80.2525	spring	Landrace (AG7)
WATDE0594	lan	WWWSC00160	WATDE0594	38325	1190413 - 1	0	India	Srinagor, Kashmir	34.1061	74.8061	spring	Landrace (AG3)
WATDE0596	lan	WWWSC00460	WATDE0596	38327	1190414 - 1	0	India	Mekhtar, Bori, Loralai	30.4741	69.3506	spring	Landrace (AG5)
WATDE0597	lan	WWWSC00151	WATDE0597	38328	1190415 - 1	0	India	Saharanpur, United Provinces	26.8734	80.2525	spring	Landrace (AG3)
WATDE0598	lan	WWWSC00758	WATDE0598	38329	1190416 - 1	0	India	Srinagor, Kashmir	34.1061	74.8061	spring	Landrace (AG7)
WATDE0599	lan	WWWSC00678	WATDE0599	38330	1190417 - 1	0	India	Srinagor, Kashmir	34.1061	74.8061	spring	Landrace (AG7)
WATDE0600	lan	WWWSC00759	WATDE0600	38331	1190418 - 1	0	India	China Kowas, Sharigh, Baluchistan	30.1904	67.7093	winter	Landrace (AG3)
WATDE0601	lan	WWWSC00819	WATDE0601	38332	1190419 - 1	0	India	Srinagor, Kashmir	34.1061	74.8061	spring	Landrace (AG3)
WATDE0602	lan	WWWSC00253	WATDE0602	38334	1190421 - 1	0	India	Khost, Sharign, Baluchistan	30.2157	67.588	spring	Landrace (AG3)
WATDE0604	mod	WWWSC00228	WATDE0604	38336	1190423 - 1	0	India	Achaloa market, Etawah, United Provinces	26.8734	80.2525	spring	Landrace (AG1)
WATDE0606	lan	WWWSC00229	WATDE0606	38338	1190424 - 1	0	India	Etawah market, Etawah, United Provinces	26.7853	79.0206	spring	Landrace (AG2)
WATDE0608	lan	WWWSC00573	WATDE0608	38340	1190425 - 1	0	India	Achaloa market, Etawah, United Provinces	26.8734	80.2525	spring	Landrace (AG7)
WATDE0609	lan	WWWSC00230	WATDE0609	38341	1190426 - 1	0	India	Etawah market, Etawah, United Provinces	26.7853	79.0206	spring	Landrace (AG3)
WATDE0610	lan	WWWSC00231	WATDE0610	38342	1190427 - 1	0	India	Auraiya market, Etawah, United Provinces	26.7846	79.0155	spring	Landrace (AG3)
WATDE0611	lan	WWWSC00148	WATDE0611	38343	1190428 - 2	0	India	Auraiya market, Etawah, United Provinces	26.8734	80.2525	spring	Landrace (AG3)
WATDE0612	lan	WWWSC00246	WATDE0612	38344	1190429 - 1	0	India	Kibzai, Lower Zhob, Baluchistan	30.741	69.4132	spring	Landrace (AG3)
WATDE0613	lan	WWWSC00156	WATDE0613	38345	1190430 - 1	0	India	Sadar Killa Saifulla, Upper Zhob, Baluchistan	31.0473	68.3282	spring	Landrace (AG3)
WATDE0614	lan	WWWSC00576	WATDE0614	38346	1190431 - 1	0	India	Sadar Killa Saifulla, Upper Zhob, Baluchistan	31.0473	68.3282	spring	Landrace (AG6)
WATDE0615	lan	WWWSC00577	WATDE0615	38347	1190432 - 1	0	India	Musafirpur, Upper Zhob, Baluchistan	31.3359	69.4722	spring	Landrace (AG6)
WATDE0616	mod	WWWSC00058	WATDE0616	38349	1190434 - 1	0	China	Yunnanfu plain	24.8776	102.832	spring	Landrace (AG6)
WATDE0617	lan	WWWSC00119	WATDE0617	38350	1190435 - 1	0	China	/	39.6572	116.251	spring	Landrace (AG1)
WATDE0618	mod	WWWSC00655	WATDE0618	38351	1190436 - 1	0	China	/	39.6572	116.251	winter	Landrace (AG2)
WATDE0620	mod	WWWSC00656	WATDE0620	38353	1190437 - 1	0	China	/	39.6572	116.251	spring	Landrace (AG2)
WATDE0622	mod	WWWSC00657	WATDE0622	38355	1190438 - 3	0	China	/	39.6572	116.251	winter	Landrace (AG2)
WATDE0624	lan	WWWSC00820	WATDE0624	38357	1190439 - 1	0	China	/	39.6572	116.251	spring	Landrace (AG1)
WATDE0626	lan	WWWSC00063	WATDE0626	38360	1190441 - 1	0	China	/	39.6572	116.251	spring	Landrace (AG1)
WATDE0627	mod	WWWSC00552	WATDE0627	38361	1190442 - 1	0	China	/	39.6572	116.251	spring	Landrace (AG1)
WATDE0628	mod	WWWSC00312	WATDE0628	38362	1190443 - 1	0	China	/	39.6572	116.251	spring	Landrace (AG5)
WATDE0630	lan	WWWSC00554	WATDE0630	38365	1190445 - 1	0	China	/	39.6572	116.251	spring	Landrace (AG6)
WATDE0631	lan	WWWSC00064	WATDE0631	38366	1190446 - 1	0	China	/	39.6572	116.251	spring	Landrace (AG6)
WATDE0632	lan	WWWSC00437	WATDE0632	38367	1190447 - 3	0	China	/	39.6572	116.251	spring	Landrace (AG5)
WATDE0634	lan	WWWSC00105	WATDE0634	38369	1190448 - 1	0	Romania	/	44.4434	26.1558	spring	Landrace (AG5)
WATDE0635	lan	WWWSC00106	WATDE0635	38370	1190449 - 1	0	Romania	/	44.4434	26.1558	spring	Landrace (AG1)
WATDE0636	lan	WWWSC00477	WATDE0636	38371	1190450 - 3	0	Romania	/	44.4434	26.1558	winter	Landrace (AG5)
WATDE0638	lan	WWWSC00415	WATDE0638	38374	1190452 - 2	0	Afghanistan	/	34.5084	68.9417	winter	Landrace (AG5)
WATDE0639	lan	WWWSC00520	WATDE0639	38375	1190453 - 1	0	Afghanistan	/	34.5084	68.9417	spring	Landrace (AG7)
WATDE0640	lan	WWWSC00521	WATDE0640	38376	1190454 - 1	0	Afghanistan	/	34.5084	68.9417	spring	Landrace (AG7)
WATDE0641	lan	WWWSC00821	WATDE0641	38377	1190455 - 2	0	Afghanistan	/	34.5084	68.9417	spring	Landrace (AG3)
WATDE0643	lan	WWWSC00201	WATDE0643	38379	1190456 - 1	0	Afghanistan	/	34.5084	68.9417	spring	Landrace (AG4)
WATDE0644	lan	WWWSC00300	WATDE0644	38380	1190457 - 1	0	Afghanistan	/	34.5084	68.9417	spring	Landrace (AG4)
WATDE0646	lan	WWWSC00112	WATDE0646	38382	1190458 - 2	0	Afghanistan	/	34.5084	68.9417	spring	Landrace (AG6)
WATDE0648	lan	WWWSC00522	WATDE0648	38384	1190459 - 1	0	Afghanistan	/	34.5084	68.9417	spring	Landrace (AG5)
WATDE0649	lan	WWWSC00202	WATDE0649	38386	1190461 - 1	0	Afghanistan	/	34.5084	68.9417	spring	Landrace (AG3)
WATDE0650	lan	WWWSC00644	WATDE0650	38387	1190462 - 2	0	Afghanistan	/	34.5084	68.9417	winter	Landrace (AG7)
WATDE0651	lan	WWWSC00645	WATDE0651	38388	1190463 - 1	0	Afghanistan	/	34.5084	68.9417	spring	Landrace (AG3)
WATDE0652	lan	WWWSC00646	WATDE0652	38389	1190464 - 1	0	Afghanistan	/	34.5084	68.9417	spring	Landrace (AG7)
WATDE0653	lan	WWWSC00203	WATDE0653	38390	1190465 - 1	0	Afghanistan	/	34.5084	68.9417	spring	Landrace (AG3)
WATDE0655	lan	WWWSC00204	WATDE0655	38392	1190466 - 3	0	Afghanistan	/	34.5084	68.9417	spring	Landrace (AG3)
WATDE0657	lan	WWWSC00416	WATDE0657	38394	1190467 - 1	0	Afghanistan	/	34.5084	68.9417	spring	Landrace (AG7)
WATDE0658	lan	WWWSC00205	WATDE0658	38396	1190469 - 1	0	Afghanistan	/	34.5084	68.9417	spring	Landrace (AG3)
WATDE0659	lan	WWWSC00417	WATDE0659	38397	1190470 - 1	0	Afghanistan	/	34.5084	68.9417	spring	Landrace (AG3)
WATDE0660	lan	WWWSC00302	WATDE0660	38399	1190472 - 1	0	Afghanistan	/	34.5084	68.9417	winter	Landrace (AG3)
WATDE0661	lan	WWWSC00001	WATDE0661	38400	1190473 - 1	0	Afghanistan	/	34.5084	68.9417	spring	Landrace (AG3)
WATDE0662	lan	WWWSC00751	WATDE0662	38403	1190476 - 2	0	Afghanistan	/	34.5084	68.9417	spring	Landrace (AG3)
WATDE0663	mod	WWWSC00604	WATDE0663	38404	1190477 - 1	0	Portugal	Almodovar	37.4857	-8.0757	spring	Landrace (AG6)
WATDE0664	lan	WWWSC00207	WATDE0664	38405	1190478 - 1	0	Afghanistan	/	34.5084	68.9417	spring	Landrace (AG3)
WATDE0665	lan	WWWSC00021	WATDE0665	38406	1190479 - 1	0	Poland	/	52.2597	21.0415	spring	Landrace (AG3)
WATDE0666	lan	WWWSC00400	WATDE0666	38407	1190480 - 1	0	Poland	/	52.2597	21.0415	winter	Landrace (AG2)
WATDE0667	lan	WWWSC00471	WATDE0667	38409	1190482 - 1	0	Poland	/	52.2597	21.0415	winter	Landrace (AG5)
WATDE0668	lan	WWWSC00464	WATDE0668	38411	1190484 - 1	0	Italy	/	41.9262	12.4175	spring	Landrace (AG6)
WATDE0669	lan	WWWSC00208	WATDE0669	38412	1190485 - 2	0	Algeria	/	36.7384	3.1485	spring	Landrace (AG4)
WATDE0670	lan	WWWSC00031	WATDE0670	38413	1190486 - 1	0	USSR	Armenia	40.4551	44.8095	spring	Landrace (AG4)
WATDE0671	lan	WWWSC00282	WATDE0671	38414	1190487 - 1	0	USSR	Armenia	40.4551	44.8095	spring	Landrace (AG4)
WATDE0672	lan	WWWSC00280	WATDE0672	38415	1190488 - 1	0	USSR	Armenia	40.4551	44.8095	winter	Landrace (AG4)
WATDE0674	lan	WWWSC00281	WATDE0674	38417	1190489 - 1	0	USSR	Armenia	40.4551	44.8095	winter	Landrace (AG4)
WATDE0675	lan	WWWSC00662	WATDE0675	38418	1190490 - 1	0	France	/	48.859	2.3476	spring	Landrace (AG7)
WATDE0676	lan	WWWSC00563	WATDE0676	38419	1190491 - 1	0	France	/	48.859	2.3476	spring	Landrace (AG7)
WATDE0678	lan	WWWSC00775	WATDE0678	38421	1190492 - 1	0	Spain	Navarre	42.716	-1.6731	spring	Landrace (AG2)
WATDE0679	lan	WWWSC00026	WATDE0679	38422	1190493 - 1	0	Tunisia	Béja (El-Houffia)	36.7298	9.1865	spring	Landrace (AG6)
WATDE0680	mod	WWWSC00617	WATDE0680	38423	1190494 - 1	0	Spain	Granada zone	37.1609	-3.6076	spring	Landrace (AG6)
WATDE0682	mod	WWWSC00594	WATDE0682	38425	1190495 - 1	0	Morocco	Mehannesh valley, Tetuan	35.5761	-5.3686	spring	Landrace (AG6)
WATDE0683	mod	WWWSC00585	WATDE0683	38427	1190497 - 1	0	Morocco	Settat, Casablanca	33.0254	-7.6301	spring	Landrace (AG6)
WATDE0685	mod	WWWSC00639	WATDE0685	38429	1190498 - 1	0	Turkey	/	39.9344	32.8182	spring	Landrace (AG6)
WATDE0686	lan	WWWSC00193	WATDE0686	38430	1190499 - 1	0	Turkey	Afion-Kara-Hissar, 200 miles E of Izmir	38.7617	30.7103	spring	Landrace (AG7)
WATDE0687	lan	WWWSC00169	WATDE0687	38431	1190500 - 1	0	Iraq	Diwaniyah	31.9836	44.9076	winter	Landrace (AG4)
WATDE0688	lan	WWWSC00268	WATDE0688	38432	1190501 - 1	0	Iraq	Mosul	36.3564	43.1486	spring	Landrace (AG3)
WATDE0689	mod	WWWSC00002	WATDE0689	38433	1190502 - 2	0	Burma	S. Shan States (Imperial Institute)	21.8801	97.9814	spring	Landrace (AG3)
WATDE0691	lan	WWWSC00210	WATDE0691	38435	1190503 - 1	0	Burma	S. Shan States (Imperial Institute)	21.8801	97.9814	spring	Landrace (AG3)
WATDE0693	lan	WWWSC00120	WATDE0693	38437	1190504 - 1	0	China	Yu Mao Grain Store, Hatamen Street, Peking. Ggown in city suburbs	39.9333	116.298	spring	Landrace (AG3)
WATDE0694	lan	WWWSC00166	WATDE0694	38438	1190505 - 1	0	Iran	Kharaghan, 90 miles S of Tehran	35.7154	51.3951	spring	Landrace (AG3)
WATDE0695	lan	WWWSC00167	WATDE0695	38439	1190506 - 1	0	Iran	Abbas Abad, Shahriar district, SW of Tehran	35.7166	51.3869	spring	Landrace (AG3)
WATDE0697	lan	WWWSC00141	WATDE0697	38442	1190508 - 3	0	Greece	Vissinia of Kastoria	40.6227	21.312	spring	Landrace (AG3)
WATDE0699	mod	WWWSC00822	WATDE0699	38444	1190509 - 1	0	Portugal	Elvas	38.8812	-7.1631	spring	Landrace (AG6)
WATDE0700	mod	WWWSC00598	WATDE0700	38445	1190510 - 1	0	Portugal	Sacavem	38.7914	-9.104	spring	Landrace (AG6)
WATDE0702	mod	WWWSC00239	WATDE0702	38447	1190512 - 1	0	India	Punjab	30.763	75.0681	spring	Landrace (AG6)
WATDE0703	lan	WWWSC00264	WATDE0703	38448	1190513 - 1	0	Iran	Hajjilu, N Hamadan	38.5214	47.6532	spring	Landrace (AG3)
WATDE0705	lan	WWWSC00681	WATDE0705	38450	1190515 - 1	0	Iran	Kermanshah	34.3423	47.0821	spring	Landrace (AG5)
WATDE0706	lan	WWWSC00092	WATDE0706	38451	1190516 - 1	0	India	Khaga, Fatehpore, United Provinces	26.8734	80.2525	spring	Landrace (AG1)
WATDE0709	mod	WWWSC00153	WATDE0709	38454	1190518 - 1	0	India	Paraspur, Misrikh, United Provinces	27.4323	80.5221	spring	Landrace (AG3)
WATDE0710	lan	WWWSC00453	WATDE0710	38455	1190519 - 1	0	India	Sandilla, Hardoi, United Provinces	26.8734	80.2525	spring	Landrace (AG2)
WATDE0712	lan	WWWSC00324	WATDE0712	38457	1190520 - 1	0	India	Hardoi market, United Provinces	26.8734	80.2525	spring	Landrace (AG3)
WATDE0713	lan	WWWSC00225	WATDE0713	38458	1190521 - 2	0	India	Istafabad, Basti, United Provinces	26.8105	82.7503	winter	Landrace (AG4)
WATDE0714	lan	WWWSC00013	WATDE0714	38459	1190522 - 1	0	India	Akilganj, Farrukhabad, United Provinces	27.2608	79.6318	spring	Landrace (AG3)
WATDE0716	lan	WWWSC00232	WATDE0716	38461	1190523 - 1	0	India	Jaswantnagar market, Etawah, United Provinces	26.8864	78.8993	spring	Landrace (AG6)
WATDE0718	mod	WWWSC00089	WATDE0718	38463	1190524 - 2	0	India	Auraiya market, Etawah, United Provinces	26.7846	79.0155	spring	Landrace (AG6)
WATDE0720	mod	WWWSC00454	WATDE0720	38465	1190525 - 1	0	India	Auraiya market, Etawah, United Provinces	26.7846	79.0155	spring	Landrace (AG7)
WATDE0721	mod	WWWSC00157	WATDE0721	38466	1190526 - 2	0	India	Musafirpur, Upper Zhob, Baluchistan	31.3359	69.4722	spring	Landrace (AG7)
WATDE0723	lan	WWWSC00669	WATDE0723	38468	1190527 - 2	0	India	Zarala, Dalbandin, Baluchistan	28.8967	64.3959	spring	Landrace (AG3)
WATDE0725	lan	WWWSC00216	WATDE0725	38470	1190528 - 1	0	China	/	39.6572	116.251	spring	Landrace (AG1)
WATDE0726	mod	WWWSC00647	WATDE0726	38471	1190529 - 1	0	Afghanistan	/	34.5084	68.9417	spring	Landrace (AG3)
WATDE0727	lan	WWWSC00303	WATDE0727	38472	1190530 - 1	0	Afghanistan	/	34.5084	68.9417	spring	Landrace (AG3)
WATDE0728	lan	WWWSC00708	WATDE0728	38473	1190531 - 1	0	Spain	Navarre	42.716	-1.6731	spring	Landrace (AG7)
WATDE0729	mod	WWWSC00276	WATDE0729	38474	1190532 - 1	0	Tunisia	Gardimaou	36.4498	8.4389	spring	Landrace (AG6)
WATDE0730	lan	WWWSC00692	WATDE0730	38475	1190533 - 1	0	Morocco	Mazagan district	33.2355	-8.498	spring	Landrace (AG6)
WATDE0732	lan	WWWSC00469	WATDE0732	38477	1190534 - 1	0	Morocco	Granja Agricola, Quebdana, Melilla	35.3147	-2.9547	spring	Landrace (AG6)
WATDE0735	mod	WWWSC00172	WATDE0735	38480	1190536 - 2	0	Morocco	Tismatinaum, Ghomara	36.7506	-3.2506	spring	Landrace (AG6)
WATDE0736	mod	WWWSC00739	WATDE0736	38481	1190537 - 1	0	Tunisia	Souk-el-Arba,	34.6803	-5.9927	spring	Landrace (AG6)
WATDE0737	mod	WWWSC00784	WATDE0737	38482	1190538 - 1	0	Tunisia	Souk-el-Arba	36.5008	8.7708	spring	Landrace (AG6)
WATDE0738	lan	WWWSC00608	WATDE0738	38483	1190539 - 1	0	Spain	Navarre	42.716	-1.6731	spring	Landrace (AG7)
WATDE0739	lan	WWWSC00609	WATDE0739	38484	1190540 - 1	0	Spain	Navarre	42.716	-1.6731	spring	Landrace (AG4)
WATDE0740	lan	WWWSC00823	WATDE0740	38485	1190541 - 3	0	Spain	Navarre	42.716	-1.6731	spring	Landrace (AG7)
WATDE0742	lan	WWWSC00729	WATDE0742	38487	1190542 - 1	0	Spain	Navarre	42.716	-1.6731	spring	Landrace (AG7)
WATDE0743	lan	WWWSC00723	WATDE0743	38488	1190543 - 2	0	Spain	Navarre	42.716	-1.6731	spring	Landrace (AG6)
WATDE0744	lan	WWWSC00727	WATDE0744	38489	1190544 - 1	0	Spain	Navarre	42.716	-1.6731	spring	Landrace (AG6)
WATDE0745	lan	WWWSC00336	WATDE0745	38490	1190545 - 1	0	Spain	Navarre	42.716	-1.6731	spring	Landrace (AG7)
WATDE0747	mod	WWWSC00186	WATDE0747	38493	1190547 - 1	0	Spain	Navarre	42.716	-1.6731	spring	Landrace (AG6)
WATDE0748	lan	WWWSC00711	WATDE0748	38494	1190548 - 1	0	Spain	Navarre	42.716	-1.6731	spring	Landrace (AG6)
WATDE0749	lan	WWWSC00715	WATDE0749	38495	1190549 - 1	0	Spain	Navarre	42.716	-1.6731	spring	Landrace (AG6)
WATDE0750	lan	WWWSC00728	WATDE0750	38496	1190550 - 2	0	Spain	Navarre	42.716	-1.6731	spring	Landrace (AG6)
WATDE0751	mod	WWWSC00546	WATDE0751	38498	1190552 - 2	0	Canary Islands	Teneriffe	28.2681	-16.6327	spring	Landrace (AG6)
WATDE0752	mod	WWWSC00311	WATDE0752	38499	1190553 - 2	0	Canary Islands	Grand Canary	27.9188	-15.6169	spring	Landrace (AG6)
WATDE0754	mod	WWWSC00787	WATDE0754	38501	1190554 - 1	0	Canary Islands	Teneriffe	28.2681	-16.6327	spring	Landrace (AG6)
WATDE0755	mod	WWWSC00734	WATDE0755	38502	1190555 - 1	0	Spain	Campiñas, Seville	37.3879	-5.9839	spring	Landrace (AG7)
WATDE0756	mod	WWWSC00003	WATDE0756	38503	1190556 - 1	0	Canary Islands	Teneriffe	28.2681	-16.6327	spring	Landrace (AG6)
WATDE0758	lan	WWWSC00211	WATDE0758	38505	1190557 - 1	0	Canary Islands	Teneriffe	28.2681	-16.6327	spring	Landrace (AG7)
WATDE0759	lan	WWWSC00652	WATDE0759	38506	1190558 - 1	0	Canary Islands	Teneriffe	28.2681	-16.6327	spring	Landrace (AG7)
WATDE0760	lan	WWWSC00188	WATDE0760	38507	1190559 - 1	0	Spain	Tarifa-Jimena zone, Cadiz	36.5282	-6.2878	spring	Landrace (AG6)
WATDE0761	lan	WWWSC00135	WATDE0761	38509	1190561 - 1	0	Crete	Vafe, Apokoronna, Canea	35.5125	24.0247	spring	Landrace (AG6)
WATDE0762	mod	WWWSC00557	WATDE0762	38511	1190563 - 1	0	Crete	Plain of Messara, Candia district	35.3381	25.1349	spring	Landrace (AG6)
WATDE0763	mod	WWWSC00143	WATDE0763	38512	1190564 - 1	0	Greece	Patras district, Peloponese	38.2376	21.7407	spring	Landrace (AG6)
WATDE0765	mod	WWWSC00144	WATDE0765	38514	1190565 - 1	0	Greece	Patras district, Peloponese	38.2376	21.7407	spring	Landrace (AG6)
WATDE0766	mod	WWWSC00567	WATDE0766	38516	1190567 - 1	0	Greece	Kalvarita district, Peloponese	38.033	22.1114	spring	Landrace (AG6)
WATDE0768	mod	WWWSC00142	WATDE0768	38519	1190569 - 1	0	Greece	Corfu Island	39.6242	19.9218	spring	Landrace (AG6)
WATDE0769	mod	WWWSC00138	WATDE0769	38520	1190570 - 1	0	Greece	Tyrnavos, Larissa & Pharsala districts of Thessalia	39.2957	22.3837	spring	Landrace (AG7)
WATDE0770	mod	WWWSC00744	WATDE0770	38521	1190571 - 1	0	Turkey	Oushak, 120 miles E of Izmir	38.4337	27.1779	spring	Landrace (AG6)
WATDE0771	lan	WWWSC00275	WATDE0771	38522	1190572 - 1	0	Syria	Hama	35.1417	36.7532	spring	Landrace (AG6)
WATDE0773	lan	WWWSC00278	WATDE0773	38524	1190573 - 1	0	Turkey	Tireh	38.0902	27.7309	spring	Landrace (AG6)
WATDE0774	mod	WWWSC00194	WATDE0774	38525	1190574 - 1	0	Turkey	/	39.9344	32.8182	spring	Landrace (AG7)
WATDE0775	mod	WWWSC00792	WATDE0775	38526	1190575 - 2	0	Iran	Sarakhs district, NE of Meshed	36.5438	61.1528	spring	Landrace (AG3)
WATDE0776	lan	WWWSC00265	WATDE0776	38527	1190576 - 1	0	Iran	Rasht, Caspian shore	37.279	49.5898	spring	Landrace (AG4)
WATDE0777	lan	WWWSC00760	WATDE0777	38528	1190577 - 1	0	Iran	Sarakhs district, NE of Meshed	36.5438	61.1528	spring	Landrace (AG7)
WATDE0779	lan	WWWSC00581	WATDE0779	38530	1190578 - 1	0	Iran	Nasseri, Khusistan	31.7229	48.9191	spring	Landrace (AG7)
WATDE0780	lan	WWWSC00682	WATDE0780	38533	1190581 - 1	0	Iran	Nasseri, Khusistan	35.8004	58.9326	spring	Landrace (AG7)
WATDE0781	lan	WWWSC00122	WATDE0781	38534	1190582 - 1	0	China	Wuchang	30.5648	114.344	spring	Landrace (AG5)
WATDE0782	lan	WWWSC00065	WATDE0782	38535	1190583 - 1	0	China	Chongteh (West of Tungting lake)	28.9264	112.258	spring	Landrace (AG1)
WATDE0783	lan	WWWSC00123	WATDE0783	38536	1190584 - 1	0	China	Yuan Hsing Shen General Store, Tung An Men Ta-Chieh, Peking. Grown S metropolitan area	39.9333	116.298	spring	Landrace (AG3)
WATDE0785	lan	WWWSC00124	WATDE0785	38538	1190585 - 2	0	China	Chongteh (West of Tungting lake)	28.9264	112.258	spring	Landrace (AG5)
WATDE0786	mod	WWWSC00313	WATDE0786	38539	1190586 - 2	0	China	Chongteh (West of Tungting lake)	28.9264	112.258	spring	Landrace (AG2)
WATDE0788	mod	WWWSC00125	WATDE0788	38541	1190587 - 1	0	China	Lingsiag, Sinti	25.6901	111.908	spring	Landrace (AG6)
WATDE0789	lan	WWWSC00126	WATDE0789	38542	1190588 - 1	0	China	Lingsiag, Sinti	25.6901	111.908	spring	Landrace (AG3)
WATDE0790	lan	WWWSC00127	WATDE0790	38543	1190589 - 1	0	China	Yu Mao Grain Store, Hatamen Street, Peking. Ggown in city suburbs	39.9333	116.298	spring	Landrace (AG3)
WATDE0793	mod	WWWSC00700	WATDE0793	38547	1190592 - 1	0	Portugal	Silves	37.1885	-8.4411	spring	Landrace (AG7)
WATDE0794	mod	WWWSC00182	WATDE0794	38548	1190593 - 1	0	Portugal	Franca de Xira	38.9364	-8.967	spring	Landrace (AG3)
WATDE0795	mod	WWWSC00179	WATDE0795	38549	1190594 - 2	0	Portugal	Mafra	38.9446	-9.3323	spring	Landrace (AG6)
WATDE0797	mod	WWWSC00177	WATDE0797	38551	1190595 - 1	0	Portugal	Serpa	37.9443	-7.5978	spring	Landrace (AG6)
WATDE0798	mod	WWWSC00181	WATDE0798	38552	1190596 - 3	0	Portugal	Portalegre	39.2966	-7.4284	spring	Landrace (AG6)
WATDE0800	mod	WWWSC00694	WATDE0800	38554	1190597 - 1	0	Portugal	Frontiera	39.0559	-7.6473	spring	Landrace (AG7)
WATDE0801	mod	WWWSC00697	WATDE0801	38555	1190598 - 1	0	Portugal	Mertola	37.6446	-7.6646	spring	Landrace (AG7)
WATDE0802	mod	WWWSC00698	WATDE0802	38556	1190599 - 1	0	Portugal	Regnengos	38.4253	-7.5345	spring	Landrace (AG7)
WATDE0803	lan	WWWSC00720	WATDE0803	38557	1190600 - 1	0	Spain	Andilla	39.8361	-0.8143	spring	Landrace (AG6)
WATDE0804	mod	WWWSC00736	WATDE0804	38558	1190601 - 1	0	Spain	Aleira, Mediterranean coast.	38.9133	-0.2072	spring	Landrace (AG6)
WATDE0805	lan	WWWSC00481	WATDE0805	38559	1190602 - 2	0	Spain	/	40.3276	-3.7965	spring	Landrace (AG7)
WATDE0807	mod	WWWSC00346	WATDE0807	38561	1190603 - 1	0	Spain	Navarre	42.716	-1.6731	spring	Landrace (AG2)
WATDE0808	lan	WWWSC00274	WATDE0808	38562	1190604 - 2	0	Spain	Uterga, 18km from Pamplona, Navarre	42.7091	-1.7604	spring	Landrace (AG5)
WATDE0810	lan	WWWSC00221	WATDE0810	38565	1190606 - 1	0	Greece	Ano Nevoliany, Florina	40.767	21.4894	spring	Landrace (AG5)
WATDE0811	lan	WWWSC00749	WATDE0811	38566	1190607 - 1	0	Yugoslavia	Veliko Hoce	46.4864	15.6463	spring	Landrace (AG7)
WATDE0812	lan	WWWSC00506	WATDE0812	38567	1190608 - 1	0	Yugoslavia	Martijanec, Varazdin, Croatia	46.2716	16.528	spring	Landrace (AG5)
WATDE0814	mod	WWWSC00643	WATDE0814	38569	1190609 - 1	0	Yugoslavia	Bukovica, Dalmatia	43.6022	20.213	spring	Landrace (AG6)
WATDE0815	lan	WWWSC00297	WATDE0815	38570	1190610 - 1	0	Yugoslavia	Travnik, Bosnia	44.2272	17.6491	spring	Landrace (AG5)
WATDE0816	lan	WWWSC00054	WATDE0816	38571	1190611 - 1	0	Yugoslavia	Rogatica, Sarajevo, Bosnia	43.7989	19.0042	spring	Landrace (AG5)
WATDE0817	lan	WWWSC00750	WATDE0817	38572	1190612 - 1	0	Yugoslavia	Krizevci, Croatia	46.0322	16.5443	spring	Landrace (AG7)
WATDE0818	lan	WWWSC00298	WATDE0818	38573	1190613 - 1	0	Yugoslavia	Prilep	41.3434	21.5542	spring	Landrace (AG5)
WATDE0819	lan	WWWSC00353	WATDE0819	38574	1190614 - 1	0	Yugoslavia	Novi Sad	45.2757	19.835	spring	Landrace (AG5)
WATDE0821	mod	WWWSC00824	WATDE0821	38576	1190615 - 2	0	Yugoslavia	Sv Ivan Zelina, Croatia	45.9589	16.245	spring	Landrace (AG5)
WATDE0823	mod	WWWSC00747	WATDE0823	38578	1190616 - 1	0	Yugoslavia	Brestaca, Novska, Croatia	45.3352	16.9613	winter	Landrace (AG5)
WATDE0825	lan	WWWSC00748	WATDE0825	38580	1190617 - 1	0	Yugoslavia	Brestaca, Novska, Croatia	45.3352	16.9613	spring	Landrace (AG7)
WATDE0826	lan	WWWSC00510	WATDE0826	38581	1190618 - 2	0	Yugoslavia	Veliko Hoce	46.4864	15.6463	spring	Landrace (AG5)
WATDE0827	lan	WWWSC00355	WATDE0827	38582	1190619 - 1	0	Yugoslavia	Velika Kladusa, Bosnia	45.1849	15.8074	spring	Landrace (AG5)
WATDE0828	lan	WWWSC00767	WATDE0828	38583	1190620 - 1	0	Yugoslavia	Sovlinec, Sv. Ivan Zelina, Croatia	45.8692	16.1512	spring	Landrace (AG5)
WATDE0830	lan	WWWSC00651	WATDE0830	38585	1190621 - 1	0	Bulgaria	Popovo	43.3491	26.2267	winter	Landrace (AG2)
WATDE0831	lan	WWWSC00429	WATDE0831	38586	1190622 - 1	0	Bulgaria	Torlak, Razgrad	43.6067	26.2402	spring	Landrace (AG5)
WATDE0833	lan	WWWSC00434	WATDE0833	38588	1190623 - 3	0	Bulgaria	Konstandenez	42.7663	23.2482	spring	Landrace (AG5)
WATDE0835	lan	WWWSC00168	WATDE0835	38591	1190625 - 1	0	Iran	Hajjilu, N Hamadan	38.5214	47.6532	spring	Landrace (AG3)
WATDE0836	lan	WWWSC00161	WATDE0836	38592	1190626 - 1	0	Iran	Khorasan	35.8004	58.9326	spring	Landrace (AG3)
WATDE0837	mod	WWWSC00100	WATDE0837	38594	1190628 - 2	0	Iran	Meshed, Khorasan	36.3103	59.5836	spring	Landrace (AG4)
WATDE0839	lan	WWWSC00679	WATDE0839	38597	1190630 - 1	0	Iran	Khorasan	35.8004	58.9326	spring	Landrace (AG3)
WATDE0840	lan	WWWSC00164	WATDE0840	38598	1190631 - 1	0	Iran	Hashdarud, Azerbaijan province	37.8971	44.9428	spring	Landrace (AG4)
WATDE0841	lan	WWWSC00017	WATDE0841	38599	1190632 - 1	0	Iran	Meshed, Khorasan	36.3103	59.5836	spring	Landrace (AG3)
WATDE0843	lan	WWWSC00016	WATDE0843	38601	1190633 - 2	0	India	/	28.689	77.2378	spring	Landrace (AG3)
WATDE0845	lan	WWWSC00447	WATDE0845	38603	1190634 - 1	0	Hungary	/	47.5125	19.0111	spring	Landrace (AG5)
WATDE0846	lan	WWWSC00448	WATDE0846	38604	1190635 - 1	0	Hungary	/	47.5125	19.0111	spring	Landrace (AG7)
WATDE0848	lan	WWWSC00488	WATDE0848	38606	1190636 - 2	0	Tunisia	Sfax (Hadj Gacem)	34.7636	10.7269	winter	Landrace (AG5)
WATDE0850	lan	WWWSC00314	WATDE0850	38609	1190638 - 1	0	Crete	Nerokourou, Cydonia, Canea	35.4889	24.0323	spring	Landrace (AG6)
WATDE0851	mod	WWWSC00683	WATDE0851	38611	1190640 - 1	0	Iran	Dunlatabad	36.1708	57.7454	spring	Landrace (AG7)
WATDE0852	lan	WWWSC00675	WATDE0852	38612	1190641 - 1	0	India	Safipur, Unnao, Loralai	26.7373	80.3432	spring	Landrace (AG7)
WATDE0854	mod	WWWSC00241	WATDE0854	38614	1190642 - 2	0	India	Babarpur, Farrukhabad, United Provinces	27.394	79.5214	spring	Landrace (AG7)
WATDE0856	lan	WWWSC00097	WATDE0856	38616	1190643 - 1	0	India	Saharanpur, United Provinces	29.9731	77.5506	spring	Landrace (AG3)
WATDE0857	lan	WWWSC00152	WATDE0857	38617	1190644 - 1	0	India	Saharanpur, United Provinces	26.8734	80.2525	spring	Landrace (AG6)
WATDE0859	lan	WWWSC00095	WATDE0859	38619	1190645 - 1	0	India	United Provinces	26.7256	84.2297	winter	Landrace (AG2)
WATDE0861	mod	WWWSC00090	WATDE0861	38621	1190646 - 1	0	India	Jaswantnagar market, Etawah, United Provinces	26.8734	80.2525	spring	Landrace (AG1)
WATDE0862	mod	WWWSC00066	WATDE0862	38622	1190647 - 1	0	China	/	39.6572	116.251	spring	Landrace (AG2)
WATDE0863	lan	WWWSC00128	WATDE0863	38623	1190648 - 1	0	China	/	39.6572	116.251	spring	Landrace (AG1)
WATDE0864	mod	WWWSC00067	WATDE0864	38624	1190649 - 1	0	China	/	39.6572	116.251	spring	Landrace (AG1)
WATDE0865	lan	WWWSC00006	WATDE0865	38625	1190650 - 2	0	China	/	39.6572	116.251	spring	Landrace (AG5)
WATDE0868	mod	WWWSC00068	WATDE0868	38630	1190653 - 1	0	China	/	39.6572	116.251	spring	Landrace (AG2)
WATDE0869	lan	WWWSC00653	WATDE0869	38631	1190654 - 3	0	China	/	39.6572	116.251	spring	Landrace (AG5)
WATDE0871	mod	WWWSC00069	WATDE0871	38633	1190655 - 1	0	China	/	39.6572	116.251	spring	Landrace (AG1)
WATDE0872	lan	WWWSC00070	WATDE0872	38634	1190656 - 1	0	China	/	39.6572	116.251	spring	Landrace (AG1)
WATDE0873	mod	WWWSC00071	WATDE0873	38635	1190657 - 1	0	China	/	39.6572	116.251	spring	Landrace (AG1)
WATDE0874	mod	WWWSC00072	WATDE0874	38636	1190658 - 1	0	China	/	39.6572	116.251	spring	Landrace (AG1)
WATDE0875	mod	WWWSC00073	WATDE0875	38637	1190659 - 1	0	China	/	39.6572	116.251	spring	Landrace (AG1)
WATDE0876	mod	WWWSC00074	WATDE0876	38638	1190660 - 1	0	China	/	39.6572	116.251	spring	Landrace (AG1)
WATDE0877	lan	WWWSC00284	WATDE0877	38639	1190661 - 1	0	USSR	/	55.5652	37.3689	spring	Landrace (AG3)
WATDE0878	lan	WWWSC00476	WATDE0878	38641	1190663 - 1	0	Romania	/	44.4434	26.1558	winter	Landrace (AG5)
WATDE0879	lan	WWWSC00418	WATDE0879	38642	1190664 - 1	0	Afghanistan	/	34.5084	68.9417	winter	Landrace (AG5)
WATDE0880	lan	WWWSC00419	WATDE0880	38643	1190665 - 2	0	Afghanistan	/	34.5084	68.9417	winter	Landrace (AG3)
WATDE0881	lan	WWWSC00420	WATDE0881	38644	1190666 - 4	0	Afghanistan	/	34.5084	68.9417	winter	Landrace (AG3)
WATDE0882	mod	WWWSC00523	WATDE0882	38645	1190667 - 1	0	Afghanistan	/	34.5084	68.9417	spring	Landrace (AG3)
WATDE0883	lan	WWWSC00299	WATDE0883	38646	1190668 - 1	0	Yugoslavia	Marena	41.4702	22.0192	spring	Landrace (AG3)
WATDE0884	lan	WWWSC00435	WATDE0884	38647	1190669 - 4	0	China	Mukden	41.8203	123.395	winter	Landrace (AG5)
WATDE0887	lan	WWWSC00474	WATDE0887	38652	1190672 - 1	0	Poland	/	52.2597	21.0415	winter	Landrace (AG5)
WATDE0888	lan	WWWSC00195	WATDE0888	38653	1190673 - 1	0	USSR	Armenia	40.4551	44.8095	spring	Landrace (AG3)
WATDE0889	lan	WWWSC00170	WATDE0889	38654	1190674 - 1	0	Iraq	Baqubah	33.7535	44.6091	spring	Landrace (AG6)
WATDE0890	mod	WWWSC00107	WATDE0890	38655	1190675 - 1	0	Tunisia	Thibar	36.5239	9.1061	spring	Landrace (AG1)
WATDE0892	mod	WWWSC00489	WATDE0892	38657	1190676 - 3	0	Tunisia	Le Dyr du Kef	36.1685	8.7061	spring	Landrace (AG5)
WATDE0894	mod	WWWSC00732	WATDE0894	38659	1190677 - 2	0	Spain	Onteniente	38.8215	-0.6073	winter	Landrace (AG4)
WATDE0895	lan	WWWSC00267	WATDE0895	38660	1190678 - 1	0	Iran	Hashtjerd, nr Kazvin	36.2804	50.0036	spring	Landrace (AG3)
WATDE0896	lan	WWWSC00762	WATDE0896	38661	1190679 - 1	0	Iran	Hashtjerd, nr Kazvin	36.2804	50.0036	spring	Landrace (AG5)
WATDE0898	lan	WWWSC00582	WATDE0898	38664	1190681 - 1	0	Iran	Rasht, Caspian shore	37.279	49.5898	spring	Landrace (AG4)
WATDE0899	mod	WWWSC00555	WATDE0899	38665	1190682 - 1	0	Crete	Plain of Messara, Candia district	35.3381	25.1349	spring	Landrace (AG6)
WATDE0900	lan	WWWSC00761	WATDE0900	38667	1190684 - 1	0	Iran	Sari, Mazanderan	36.5634	53.0652	spring	Landrace (AG2)
WATDE0901	lan	WWWSC00596	WATDE0901	38669	1190686 - 1	0	Morocco	Mazagan district	33.2355	-8.498	spring	Landrace (AG6)
WATDE0902	lan	WWWSC00634	WATDE0902	38670	1190687 - 1	0	Tunisia	Oued Zargua	36.6665	9.4405	spring	Landrace (AG1)
WATDE0903	lan	WWWSC00712	WATDE0903	38671	1190688 - 1	0	Spain	Navarre	42.716	-1.6731	spring	Landrace (AG7)
WATDE0904	mod	WWWSC00765	WATDE0904	38672	1190689 - 1	0	Spain	Cadiz	36.5282	-6.2878	spring	Landrace (AG6)
WATDE0905	mod	WWWSC00668	WATDE0905	38674	1190691 - 1	0	Greece	Kalvarita district, Peloponese	38.033	22.1114	spring	Landrace (AG6)
WATDE0907	lan	WWWSC00684	WATDE0907	38676	1190693 - 1	0	Iraq	Tigris region	35.0914	43.6231	spring	Landrace (AG6)
WATDE0909	lan	WWWSC00217	WATDE0909	38679	1190695 - 1	0	China	T'ungch'uan, 150 miles NW of Chungking, Sichuan	29.5147	106.605	spring	Landrace (AG1)
WATDE0910	lan	WWWSC00235	WATDE0910	38680	1190696 - 1	0	India	Sikkim	27.4878	88.4039	spring	Landrace (AG3)
WATDE0911	mod	WWWSC00825	WATDE0911	38681	1190697 - 1	0	India	Matera Kalan, United Provinces	26.8734	80.2525	spring	Landrace (AG1)
WATDE0912	lan	WWWSC00788	WATDE0912	38683	1190699 - 2	0	China	/	39.6572	116.251	spring	Landrace (AG1)
WATDE0913	lan	WWWSC00101	WATDE0913	38685	1190701 - 1	0	Iran	Meshed, Khorasan	36.3103	59.5836	spring	Landrace (AG1)
WATDE0914	lan	WWWSC00826	WATDE0914	38686	1190702 - 1	0	Iran	Kerman	30.2819	57.058	spring	Landrace (AG1)
WATDE0915	lan	WWWSC00129	WATDE0915	38687	1190703 - 1	0	China	/	39.6572	116.251	spring	Landrace (AG3)
WATDE0916	lan	WWWSC00236	WATDE0916	38690	1190706 - 1	0	India	Sikkim	27.4878	88.4039	spring	Landrace (AG3)
WATDE0917	lan	WWWSC00233	WATDE0917	38692	1190708 - 1	0	India	Gangai, Sitapur, United Provinces	27.5631	80.6778	spring	Landrace (AG3)
WATDE0918	mod	WWWSC00088	WATDE0918	38693	1190710 - 1	0	India	Godi, United Provinces	26.7257	84.2297	winter	Landrace (AG1)
WATDE0919	lan	WWWSC00150	WATDE0919	38694	1190711 - 1	0	India	Sikkim	27.4878	88.4039	spring	Landrace (AG3)
WATDE0920	lan	WWWSC00676	WATDE0920	38695	1190712 - 2	0	India	Khudadad, Nasirabad, Baluchistan	30.8316	66.4826	spring	Landrace (AG3)
WATDE0922	lan	WWWSC00243	WATDE0922	38697	1190713 - 1	0	India	Saharanpur, United Provinces	29.9731	77.5506	spring	Landrace (AG3)
WATDE0923	lan	WWWSC00248	WATDE0923	38698	1190714 - 1	0	India	Lagoden, Dalbandin, Baluchistan	28.8967	64.3959	spring	Landrace (AG3)
WATDE0924	lan	WWWSC00091	WATDE0924	38699	1190715 - 1	0	India	Etawah market, Etawah, United Provinces	26.7853	79.0206	spring	Landrace (AG2)
WATDE0926	lan	WWWSC00389	WATDE0926	38701	1190716 - 1	0	India	Lagoden, Dalbandin, Baluchistan	28.8967	64.3959	spring	Landrace (AG2)
WATDE0927	lan	WWWSC00368	WATDE0927	38702	1190717 - 1	0	China	/	39.6572	116.251	spring	Landrace (AG2)
WATDE0928	lan	WWWSC00130	WATDE0928	38703	1190718 - 1	0	China	/	39.6572	116.251	spring	Landrace (AG4)
WATDE0929	lan	WWWSC00131	WATDE0929	38704	1190719 - 1	0	China	/	39.6572	116.251	spring	Landrace (AG3)
WATDE0930	lan	WWWSC00218	WATDE0930	38705	1190720 - 1	0	China	/	39.6572	116.251	spring	Landrace (AG1)
WATDE0932	lan	WWWSC00132	WATDE0932	38707	1190721 - 1	0	China	/	39.6572	116.251	spring	Landrace (AG3)
WATDE0933	lan	WWWSC00421	WATDE0933	38709	1190723 - 1	0	Afghanistan	/	34.5084	68.9417	spring	Landrace (AG5)
WATDE0934	mod	WWWSC00381	WATDE0934	38710	1190724 - 1	0	India	Etawah market, Etawah, United Provinces	26.7853	79.0206	spring	Landrace (AG2)
WATDE0935	lan	WWWSC00133	WATDE0935	38711	1190725 - 1	0	China	/	39.6572	116.251	spring	Landrace (AG3)
WATDE0937	mod	WWWSC00075	WATDE0937	38713	1190726 - 1	0	China	/	39.6572	116.251	spring	Landrace (AG1)
WATDE0938	lan	WWWSC00076	WATDE0938	38714	1190727 - 1	0	China	/	39.6572	116.251	spring	Landrace (AG1)
WATDE0939	mod	WWWSC00103	WATDE0939	38715	1190728 - 1	0	Iraq	Tigris region	35.0914	43.6231	spring	Landrace (AG1)
WATDE0941	lan	WWWSC00244	WATDE0941	38718	1190730 - 1	0	India	Laghab, Dalbandin, Baluchistan	28.8967	64.3959	winter	Landrace (AG5)
WATDE0944	lan	WWWSC00018	WATDE0944	38723	1190733 - 1	0	Iran	/	35.7316	51.3511	spring	Landrace (AG4)
WATDE0945	lan	WWWSC00109	WATDE0945	38724	1190734 - 1	0	USSR	East USSR	46.8326	-116.835	spring	Landrace (AG3)
WATDE0947	mod	WWWSC00304	WATDE0947	38726	1190735 - 1	0	Algeria	/	36.7384	3.1485	spring	Landrace (AG2)
WATDE0950	mod	WWWSC00465	WATDE0950	38729	1190737 - 1	0	Italy	Royal Exp. Sta. Rieti	42.4048	12.8554	spring	Landrace (AG5)
WATDE0951	lan	WWWSC00196	WATDE0951	38730	1190738 - 1	0	USSR	Turkestan	43.4429	68.2226	spring	Landrace (AG5)
WATDE0952	lan	WWWSC00757	WATDE0952	38731	1190739 - 1	0	India	Pusa, Bihar	25.9776	85.6489	spring	Landrace (AG5)
WATDE0953	mod	WWWSC00524	WATDE0953	38733	1190741 - 1	0	Afghanistan	/	34.5084	68.9417	spring	Landrace (AG6)
WATDE0954	lan	WWWSC00640	WATDE0954	38735	1190743 - 1	0	USSR	Yenisei	61.5236	89.3104	spring	Landrace (AG3)
WATDE0955	lan	WWWSC00827	WATDE0955	38736	1190744 - 1	0	India	Narin Khanabad, Turkestan	43.2978	68.2511	winter	Landrace (AG5)
WATDE0957	lan	WWWSC00285	WATDE0957	38738	1190745 - 1	0	USSR	Irkutsk	52.3113	104.292	spring	Landrace (AG4)
WATDE0958	lan	WWWSC00035	WATDE0958	38741	1190748 - 1	0	USSR	Armenia	40.4551	44.8095	spring	Landrace (AG4)
WATDE0961	lan	WWWSC00492	WATDE0961	38746	1190751 - 1	0	USSR	Azerbaijan	40.3805	48.038	winter	Landrace (AG5)
WATDE0963	lan	WWWSC00037	WATDE0963	38748	1190752 - 1	0	USSR	Caucasus	40.7259	44.6535	spring	Landrace (AG4)
WATDE0965	lan	WWWSC00498	WATDE0965	38751	1190754 - 1	0	USSR	/	55.5652	37.3689	winter	Landrace (AG5)
WATDE0966	lan	WWWSC00286	WATDE0966	38752	1190755 - 1	0	USSR	Crimea	45.3371	34.4746	winter	Landrace (AG5)
WATDE0967	mod	WWWSC00394	WATDE0967	38753	1190756 - 1	0	Italy	Rieti	42.4048	12.8554	winter	Landrace (AG2)
WATDE0969	lan	WWWSC00395	WATDE0969	38755	1190757 - 1	0	Italy	Bologna	44.4976	11.342	winter	Landrace (AG2)
WATDE0970	lan	WWWSC00463	WATDE0970	38756	1190758 - 2	0	Italy	Asti	44.9005	8.2063	spring	Landrace (AG7)
WATDE0971	lan	WWWSC00502	WATDE0971	38757	1190759 - 2	0	USSR	Gonzah, Armenia	40.3926	44.6694	spring	Landrace (AG7)
WATDE0973	lan	WWWSC00753	WATDE0973	38759	1190760 - 1	0	USSR	Erivan, Armenia	40.1728	44.5133	spring	Landrace (AG4)
WATDE0974	lan	WWWSC00287	WATDE0974	38760	1190761 - 1	0	USSR	Caucasus	40.7259	44.6535	spring	Landrace (AG4)
WATDE0975	lan	WWWSC00527	WATDE0975	38761	1190762 - 2	0	Algeria	/	36.7384	3.1485	spring	Landrace (AG4)
WATDE0977	lan	WWWSC00752	WATDE0977	38763	1190763 - 1	0	India	Faizabad, Turkestan	26.7819	82.1416	spring	Landrace (AG5)
WATDE0978	lan	WWWSC00009	WATDE0978	38764	1190764 - 1	0	India	Narin Khanabad, Turkestan	43.2978	68.2511	spring	Landrace (AG5)
WATDE0979	lan	WWWSC00491	WATDE0979	38765	1190765 - 1	0	USSR	Siberia	55.0219	82.7056	/	Landrace (AG5)
WATDE0981	lan	WWWSC00422	WATDE0981	38767	1190766 - 1	0	Algeria	/	36.7384	3.1485	winter	Landrace (AG5)
WATDE0982	lan	WWWSC00197	WATDE0982	38768	1190767 - 1	0	USSR	Erivan, Armenia	40.1728	44.5133	spring	Landrace (AG3)
WATDE0983	lan	WWWSC00010	WATDE0983	38769	1190768 - 1	0	India	Narin Khanabad, Turkestan	43.2978	68.2511	spring	Landrace (AG3)
WATDE0984	mod	WWWSC00114	WATDE0984	38770	1190769 - 2	0	Algeria	Hindi, Mahon	36.844	3.9835	spring	Landrace (AG6)
WATDE0986	lan	WWWSC00785	WATDE0986	38772	1190770 - 1	0	USSR	Irkutsk	52.3113	104.292	spring	Landrace (AG3)
WATDE0987	lan	WWWSC00288	WATDE0987	38774	1190772 - 1	0	USSR	Yenisei	61.5236	89.3104	winter	Landrace (AG5)
WATDE0989	lan	WWWSC00198	WATDE0989	38776	1190773 - 1	0	USSR	Georgia	32.4359	-83.1809	spring	Landrace (AG3)
WATDE0991	lan	WWWSC00137	WATDE0991	38778	1190774 - 2	0	Ethiopia	/	8.6656	39.6262	spring	Landrace (AG4)
WATDE0993	lan	WWWSC00038	WATDE0993	38780	1190775 - 2	0	USSR	Georgia	32.4359	-83.1809	spring	Landrace (AG4)
WATDE0995	lan	WWWSC00111	WATDE0995	38782	1190776 - 1	0	USSR	Georgia	32.4359	-83.1809	spring	Landrace (AG5)
WATDE0996	lan	WWWSC00584	WATDE0996	38784	1190778 - 1	0	Italy	Pragelato	44.9877	6.9319	spring	Landrace (AG6)
WATDE0997	lan	WWWSC00494	WATDE0997	38785	1190779 - 1	0	USSR	Siberia	55.0219	82.7056	winter	Landrace (AG5)
WATDE0999	lan	WWWSC00034	WATDE0999	38787	1190780 - 2	0	USSR	/	55.5652	37.3689	winter	Landrace (AG4)
WATDE1001	lan	WWWSC00499	WATDE1001	38789	1190781 - 1	0	USSR	/	55.5652	37.3689	winter	Landrace (AG5)
WATDE1002	lan	WWWSC00500	WATDE1002	38790	1190782 - 3	0	USSR	Ukraine	48.8015	32.4043	winter	Landrace (AG5)
WATDE1003	lan	WWWSC00039	WATDE1003	38791	1190783 - 1	0	USSR	Georgia	32.4359	-83.1809	spring	Landrace (AG4)
WATDE1004	lan	WWWSC00040	WATDE1004	38793	1190786 - 1	0	USSR	Erivan, Armenia	40.1728	44.5133	spring	Landrace (AG4)
WATDE1005	lan	WWWSC00041	WATDE1005	38794	1190787 - 1	0	USSR	Caucasus	40.7259	44.6535	spring	Landrace (AG4)
WATDE1008	lan	WWWSC00030	WATDE1008	38799	1190790 - 1	0	USSR	Caucasus	40.7259	44.6535	spring	Landrace (AG4)
WATDE1009	lan	WWWSC00043	WATDE1009	38800	1190792 - 1	0	USSR	Georgia	32.4359	-83.1809	spring	Landrace (AG4)
WATDE1010	lan	WWWSC00044	WATDE1010	38801	1190793 - 3	0	USSR	Azerbaijan	40.3805	48.038	spring	Landrace (AG4)
WATDE1012	lan	WWWSC00289	WATDE1012	38803	1190794 - 1	0	USSR	/	55.5652	37.3689	spring	Landrace (AG5)
WATDE1014	lan	WWWSC00045	WATDE1014	38805	1190795 - 1	0	USSR	Turkestan	43.4429	68.2226	winter	Landrace (AG5)
WATDE1016	lan	WWWSC00493	WATDE1016	38807	1190796 - 2	0	USSR	Volga	51.9302	45.561	winter	Landrace (AG5)
WATDE1017	lan	WWWSC00046	WATDE1017	38808	1190797 - 1	0	USSR	Gonzah, Armenia	40.1728	44.5133	spring	Landrace (AG4)
WATDE1018	lan	WWWSC00047	WATDE1018	38809	1190798 - 1	0	USSR	Erivan, Armenia	40.1728	44.5133	spring	Landrace (AG4)
WATDE1019	mod	WWWSC00410	WATDE1019	38810	1190799 - 2	0	USSR	Georgia	32.4359	-83.1809	spring	Landrace (AG5)
WATDE1021	lan	WWWSC00496	WATDE1021	38812	1190800 - 1	0	USSR	Armenia	40.4551	44.8095	winter	Landrace (AG5)
WATDE1023	lan	WWWSC00503	WATDE1023	38814	1190801 - 2	0	USSR	Erivan, Armenia	40.1728	44.5133	winter	Landrace (AG5)
WATDE1025	lan	WWWSC00048	WATDE1025	38816	1190802 - 1	0	USSR	Georgia	32.4359	-83.1809	spring	Landrace (AG5)
WATDE1026	lan	WWWSC00098	WATDE1026	38817	1190803 - 1	0	India	Pusa, Bihar	25.9776	85.6489	spring	Landrace (AG4)
WATDE1027	mod	WWWSC00409	WATDE1027	38818	1190804 - 1	0	USSR	Georgia	32.4359	-83.1809	spring	Landrace (AG2)
WATDE1029	lan	WWWSC00290	WATDE1029	38820	1190805 - 1	0	USSR	Erivan, Armenia	40.1728	44.5133	spring	Landrace (AG3)
WATDE1030	lan	WWWSC00270	WATDE1030	38821	1190806 - 1	0	Italy	/	41.9262	12.4175	spring	Landrace (AG3)
WATDE1031	lan	WWWSC00033	WATDE1031	38822	1190807 - 1	0	USSR	/	55.5652	37.3689	spring	Landrace (AG4)
WATDE1032	lan	WWWSC00049	WATDE1032	38823	1190808 - 1	0	USSR	Caucasus	41.7175	44.8073	/	Landrace (AG4)
WATDE1034	lan	WWWSC00291	WATDE1034	38825	1190809 - 1	0	USSR	Turkestan	43.4429	68.2226	spring	Landrace (AG3)
WATDE1035	lan	WWWSC00292	WATDE1035	38826	1190810 - 1	0	USSR	Turkestan	43.4429	68.2226	winter	Landrace (AG3)
WATDE1037	lan	WWWSC00077	WATDE1037	38829	1190812 - 1	0	China	Tsao-Ka-Doo village near Shanghai	31.0784	121.432	spring	Landrace (AG1)
WATDE1038	lan	WWWSC00094	WATDE1038	38830	1190813 - 1	0	India	Drug, Musakhel, Loralai	30.9441	69.9669	spring	Landrace (AG3)
WATDE1040	lan	WWWSC00055	WATDE1040	38833	1190815 - 1	0	unknown	/	/	/	winter	Landrace (AG3)
WATDE1042	lan	WWWSC00219	WATDE1042	38836	1190817 - 1	0	China	Peking	39.9333	116.298	winter	Landrace (AG7)
WATDE1044	mod	WWWSC00078	WATDE1044	38838	1190818 - 2	0	China	Shanghai (Tsao-Ka-Doo)	31.0784	121.432	spring	Landrace (AG1)
WATDE1046	mod	WWWSC00079	WATDE1046	38840	1190819 - 1	0	China	Shanghai (Tsao-Ka-Doo)	31.0784	121.432	spring	Landrace (AG1)
WATDE1048	lan	WWWSC00080	WATDE1048	38842	1190820 - 1	0	China	Shanghai (Tsao-Ka-Doo)	31.0784	121.432	spring	Landrace (AG1)
WATDE1049	lan	WWWSC00439	WATDE1049	38843	1190821 - 1	0	China	Shanghai (Tsao-Ka-Doo)	31.0784	121.432	spring	Landrace (AG5)
WATDE1050	lan	WWWSC00440	WATDE1050	38844	1190822 - 2	0	China	Heilung Chiang	47.4927	128.033	spring	Landrace (AG5)
WATDE1051	lan	WWWSC00081	WATDE1051	38845	1190823 - 1	0	China	Hankow	30.4161	114.321	spring	Landrace (AG1)
WATDE1052	lan	WWWSC00082	WATDE1052	38846	1190824 - 1	0	China	Shanghai (Tsao-Ka-Doo)	31.0784	121.432	spring	Landrace (AG1)
WATDE1053	lan	WWWSC00083	WATDE1053	38847	1190825 - 3	0	China	Shanghai (Tsao-Ka-Doo)	31.0784	121.432	spring	Landrace (AG1)
WATDE1055	mod	WWWSC00084	WATDE1055	38849	1190826 - 1	0	China	/	39.6572	116.251	spring	Landrace (AG1)
WATDE1056	lan	WWWSC00086	WATDE1056	38851	1190828 - 1	0	China	Shanghai (Tsao-Ka-Doo)	31.0784	121.432	spring	Landrace (AG1)
WATDE1058	lan	WWWSC00057	WATDE1058	38853	1190829 - 3	0	China	Szechuan	30.7034	104.553	spring	Landrace (AG1)
WATDE1060	lan	WWWSC00012	WATDE1060	38855	1190903 - 1	0	India	United Provinces	26.8734	80.2525	spring	Landrace (AG3)
WATDE1061	mod	WWWSC00782	WATDE1061	38856	1190904 - 1	0	Spain	Coria del Rio, 10km S of Seville	37.3879	-5.9839	spring	Landrace (AG6)
WATDE1062	lan	WWWSC00449	WATDE1062	38857	1190911 - 1	0	Hungary	/	47.5125	19.0111	spring	Landrace (AG5)
Waxwing	mod	WWWSC01029	WREN0317	45689	CIMMYT GID 8065975	0	Mexico	/	19.4194	-99.1308	/	Modern cultivar
Werla	mod	WWWSC01030	WGED0010	39766	Gediflux ID 10	W0343	Germany	/	52.5159	13.3715	winter	Modern cultivar
Wizard	mod	WWWSC01031	WGED0503	40041	Gediflux ID 503	W2565	UK	/	51.4934	-0.2681	winter	Modern cultivar
Wyalkatchem	mod	WWWSC01032	WREN0319	45691	-	0	Mexico	/	19.4194	-99.1308	/	Modern cultivar
Zemon	mod	WWWSC01034	WGED0148	39904	Gediflux ID 148	W7138	Belgium	/	50.8693	4.3325	winter	Modern cultivar
Zentos	mod	WWWSC01035	WGED0252	40008	Gediflux ID 252	0	Germany	/	52.5159	13.3715	winter	Modern cultivar
AG1: China; AG2: Europe; AG3: South/Central Asia (India) ; AG4: the Balkan and the greater Iran ; AG5: Balkan; AG6: Meditterean; AG7: South Europe/Asia.
