# Supplementary material
Source: Research Square preprint supplement (doi:10.21203/rs.3.rs-9009137/v1)
Supplement: Supplementary file 5 [file 7f0db4f1c669449a08051905.xlsx]

## Sheet: Supplementary Data 6
Supplementary Data 6. Allele composition of 20 wheat varieties and NUE-related phenotypic data from 2017 to 2021.
Allele type	Variety Name	NPF gene								2017-2018 NUE agronomic trait						2018-2019 NUE agronomic trait						2019-2020 NUE agronomic trait
		TaNPF7.6-A1	TaNPF2.4	TaNPF5.7	TaNPF7.7	TaNPF2.12	TaNPF7.7	TaNPF8.28	TaNPF8.27	NN Fields			LN Fields			NN Fields			LN Fields			NN Fields			LN Fields
		AX-111715806	AX-108770720	AX-110584241	AX-94449995	AX-109038395	AX-94449995	AX-111617345	AX-110071841	GY (kg·ha-1)	GNA (kg·ha-1)	NAA (kg·ha-1)	GY (kg·ha-1)	GNA (kg·ha-1)	NAA (kg·ha-1)	GY (kg·ha-1)	GNA (kg·ha-1)	NAA (kg·ha-1)	GY (kg·ha-1)	GNA (kg·ha-1)	NAA (kg·ha-1)	GY (kg·ha-1)	GNA (kg·ha-1)	NAA (kg·ha-1)	GY (kg·ha-1)	GNA (kg·ha-1)	NAA (kg·ha-1)
TaNPF7.6-A1lan	Anxuan 5	TT	TT	TT	CC	GG	CC	AA	AA	6612.85	177.22	331.12	4997.38	82.29	104.16	5542.9	155.86	247.84	4930.04	87.59	121.49	5689.96	159.09	265.37	4659.07	81.48	128.64
	Nanyanghong	TT	CC	CC	CC	GG	CC	GG	GG	3125.21	78.03	226.16	4206.32	74.87	101.27	3247.51	95.37	201.8	3321.86	60.42	85.04	3451.57	104.9	187.86	3443.18	63.52	97.15
	Xuzhou 14	TT	TC	TT	CC	AA	CC	GG	GG	3386.2	103.56	244.16	5356.96	107.14	148.81	4754.49	125.46	211.48	4091.68	77.63	102.29	4642.13	122.94	218.44	4071.51	68.82	96.55
	Baiyupi	TT	CC	CC	CC	GG	CC	GG	GG	4179.78	105.68	278.32	3638.97	72.78	113.2	2968.76	81.57	211.08	4682.43	90.52	116.96	4256.07	113.06	233.43	4238.23	77	88.16
	Xuzhou 438	TT	CC	CC	CC	GG	CC	GG	GG	3076.63	90.97	283.26	5577.46	111.74	161.65	3726.39	105.36	236.73	3883.63	53.28	96.03	3849.78	109.96	181.11	3852.02	69.15	86.66
	Kaifeng 124	TT	CC	CC	CC	GG	CC	GG	GG	3982.95	119.89	257.74	3951.04	72.04	96.69	3483.26	102.59	207.53	3289.18	59.47	77.35	3477.96	106.07	210.64	3137.33	56.25	89.06
	Mala	TT	TC	TT	CC	AA	CC	GG	GG	3103.78	97.56	257.8	3882.46	73.31	116.56	3371.49	108.29	238.88	3289.52	70.51	115.42	3326.69	91.47	204.65	3309.75	60.3	87.86
	Nanda 2419	GG	CC	CC	TC	GG	TC	NN	AA	5235.03	145.88	308.22	4286.8	70.88	97.33	4436.21	111.3	210.46	4534.41	76.29	110.93	4724.74	130.73	246.03	4310.64	63.72	106.9
	Xuzhou 8	TT	TC	TT	CC	AA	CC	GG	GG	3233.32	97.22	255.36	4069.63	74.47	106.54	4342.62	116.6	200.28	4674.74	73.97	107.2	4520.39	146.34	275.11	4488.31	66.3	95.95
	Ermangmai	TT	CC	CC	CC	GG	CC	GG	GG	2846.12	79.6	263.06	3971.52	60.9	85.15	2595.32	78.76	188.79	3997.19	73.69	98.3	3849.78	109.22	177.96	3838.53	73.81	98.35
TaNPF7.6-A1mod	Huapei 3	GG	TT	TT	TC	GG	TC	AG	AA	7572.99	223.66	337.18	7116.25	127.14	160.58	6855.18	160.73	238.95	6787.45	125.5	150.95	6891.3	165.41	232.38	6851.87	109.64	121.44
	Zhoumai 18	GG	TC	TT	TC	GG	TC	NN	AA	8812.69	259.68	386.03	5124.54	89	126.24	6980.24	157.62	197.52	5868.6	112.48	142.17	7092.35	176.25	236.43	5911.24	96.16	119.94
	Yumai 49	GG	TT	TT	TC	GG	TC	NN	AA	7912.4	239.75	348.36	5855	107.54	147.27	8090.63	187.02	242.14	5170.41	96.45	125.99	8037.33	181.83	246.33	5299.55	101.48	139.88
	Jimai 19	GG	TT	CC	TC	GG	TC	AA	AA	7261.51	189.04	301.36	4992.14	81.62	112.72	7834.26	176.64	247.75	5094.58	80.94	109.18	6852.47	178.55	204.65	4528.94	75.85	106
	Jimai 30	GG	TT	TT	CC	AA	CC	AA	AA	7563.94	204.86	306.4	4966.9	78.97	100.41	7101.97	183.59	274.38	4145.07	69.21	95.25	6879.76	177.54	247.53	4201.95	62.53	98.2
	Zhongyu 9307	GG	TT	TT	TC	AA	TC	AG	AA	8541.22	250.83	357.26	6726.2	110.87	145.68	9248.51	218.9	280.43	7494.88	144.85	166.47	8010.04	169.46	232.53	6142.58	88.79	108.1
	Xuke 316	GG	CC	TT	TC	AG	TC	GG	GG	7752.54	215.78	307.92	5204.55	90.73	114.64	8124.68	194.14	256.09	4108.54	63.39	86.53	7691.45	150.75	186.21	4065.22	58.55	81.71
	Zhengmai 9023	GG	TC	CC	TC	GG	TC	NN	AA	7115.22	205.99	312.18	5773.78	102.97	127.72	6667.3	167.6	236.64	5537.74	100.82	128.56	6162.97	146.52	215.74	5475.11	85.23	97.9
	Zhengmai 7698	GG	TT	TT	TC	AA	TC	NN	AA	8928.03	265.16	361.02	6625.68	117.83	149.32	8422.01	200.03	293.06	5006.24	84.19	109.85	7450.22	178.71	240.78	4953.52	71.92	97
	Zhengmai1860	GG	TT	TT	TT	AA	TT	AA	AA	9264.6	270.5	379.85	5972.35	118.08	139.22	8283.75	217.45	304.22	5458.54	93.54	111.41	9000.07	228.99	319.82	5798.64	114.02	134.82
Blue represents the superior allele; yellow represents the inferior allele; green represents heterozygous; red represents untyped.
										9264.6	270.5	379.85	5972.35	118.08	139.22	8283.75	217.45	304.22	5458.54	93.54	111.41	9000.07	228.99	319.82	5798.64	114.02	134.82
