# Supplementary material
Source: Research Square preprint supplement (doi:10.21203/rs.3.rs-9009137/v1)
Supplement: Supplementary file 6 [file 8f2f5a8830967ef613b1cd99.xlsx]

## Sheet: Supplemental Data 12
Supplemental Data 12. List of all the primers that were used in this study.
Name	Forward primer (5'-sequences)	Reverse primer (3'-sequences)	Description
pWMB110_TaNPF7.6-A1	cgactctagaggatccATGGACGCGGAGGCCGGA	gggtacccggggatccCCGGAGCTCGACTTTCTTCA	Cloning
pWMB110_TaEIL3	cgactctagaggatccATGATGGATAACTTAGCTATTGTCGC	gggtacccggggatccCGTTCCCAGATATTGCATCAAGT	Cloning
TaNPF7.6-A1_sgRNA	agcaTGAAGTTCCTTCACATGCGG	aaacCCGCATGTGAAGGAACTTCA	Cloning
TaEIL3_sgRNA	agcaGGATGTGGAAAGATAAGGTC	aaacGACCTTATCTTTCCACATCC	Cloning
TaJAZ1_sgRNA	agcaCGCGGGAGGCCTGCTGCTTG	aaacCAAGCAGCAGGCCTCCCGCG	Cloning
TaU3-Hind	CTATGTTACTAGATCAAGCTTGAATTCATCCTCACGTTCAACACC	CTGCAGGCATGCAAGCTTCCATCCACTCCAAGCTCTTGAAA	Sequencing for CRISPR-generated knockout plasmid
TaNPF7.6-A1_Cas9_A	GCATTCTACAAATTCAGAACTTGC	CACTTTCCTCTTTTTAAATGATGCG	Genotyping for CRISPR-generated TaNPF7.6-knockout lines
TaNPF7.6-A1_Cas9_B	GCAGTCATTATGTGTGATTTCTTAG	ATGAGATGCCGAATCCAAGT
TaNPF7.6-A1_Cas9_D	ATCATGTGTGATTTCTTAACTCCTA	AGGCATATCGATGAGATGCCA
TaEIL3_Cas9_A	TTCAGATATTGAGCACAACAGAAA	GCAATTGCTGCTGGCCCA	Genotyping for CRISPR-generated TaEIL3-knockout lines
TaEIL3_Cas9_B	ATTCTAAGCTTGCTCTTTTACAGC	ACTGACAGGCTTCCCTTTATCG
TaEIL3_Cas9_D	ACATAGAATTGGGATAAGTCCCTC	CCATAAACAAAACCCTGTGCATTA
TaJAZ1_Cas9_A	GGATGTTTAACGGATCCGTGCG	GCTTCGGCGTGTCCCTTTAT	Genotyping for CRISPR-generated TaJAZ1-knockout lines
TaJAZ1_Cas9_B	CTCTGTGTCTGTGTCTGTATCT	TTCGAAGTTGGATTTTACAGACAG
TaJAZ1_Cas9_D	CTGTGTCTGTGTCTGCAATCT	TTTGGCATGTCCCTTAACATAC
TaNPF7.6-A1_promoter	AGTCATAGGAACATGTATAAGT	GGCGTGCCGCTGCCGC	Cloning
pBWA(V)BII-TaNPF7.6-A1_promoter_GUS	aaaccgcctgcaggtctagatagaAGTCATAGGAACATGTATAAGT	gaaatttaccctcagatctaccatGGCGTGCCGCTGCCGC	GUS analysis
CAPS_TaNPF7.6-A1	CGTAGTCTTAGGGGACCAAGAG	CACAACAAAGAGGATGAAAAACG	CAPS molecular marker
qRT-Taα-Tubulin	ATCTCCAACTCCACCAGTGTCG	TCATCGCCCTCATCACCGTC	RT-qPCR
qRT-TaNPF7.6-A1	CCCAACCAGGTCCCGTCG	CTACCAAGTTGAGGGCAATACCAG	RT-qPCR
qRT-TaEIL3	CTTAGCTATTGTCGCGAAGGAGC	CTCAGCCTCAATCTCCTCATCG	RT-qPCR
pGEMHE_TaNPF7.6-A1_mCherry	CTTTGGCAGATCAATTCCCCGGGATGGACGCGGAGGCCGGAGA	CGCCCTTGCTCACCATGAATTCCCGGAGCTCGACTTTCTTCA	Nitrate uptake ussay in Xenopus laevis Oocytes
pGEMHE_AtNRT1.1_mCherry	CTTTGGCAGATCAATTCCCCGGGATGTCTCTTCCTGAAACTAAATCTGA	CGCCCTTGCTCACCATGAATTCATGACCCATTGGAATACTCGGCT	Nitrate uptake ussay in Xenopus laevis Oocytes
pAN580_TaNPF7.6-A1_GFP	agtccggagctagctctagaATGGACGCGGAGGCCGGA	gcggccgctgtacaggatccCCGGAGCTCGACTTTCTTCA	Subcellular localization
pAN580_TaEIL3_GFP	agtccggagctagctctagaATGATGGATAACTTAGCTATTGTCGC	gcggccgctgtacaggatccCGTTCCCAGATATTGCATCAAGT
pAN580_TaJAZ1_GFP	agtccggagctagctctagaATGGAGAGGGACTTCCTGGG	gcggccgctgtacaggatccGATGTGTAATTTTGTACTCGGGG
1305_TaNPF7.6-A1_GFP	agtccggagctagctctagaATGGACGCGGAGGCCGGA	tgctcaccatggatccCCGGAGCTCGACTTTCTTCA
1305_TaEIL3_GFP	agtccggagctagctctagaATGATGGATAACTTAGCTATTGTCGC	tgctcaccatggatccCGTTCCCAGATATTGCATCAAGT
1305_TaJAZ1_GFP	agtccggagctagctctagaATGGAGAGGGACTTCCTGGG	tgctcaccatggatccGATGTGTAATTTTGTACTCGGGG
1305_TaJAZ1_mCherry	agtccggagctagctctagaATGGAGAGGGACTTCCTGGG	tgctcaccatggatccGATGTGTAATTTTGTACTCGGGG
pAbAi_TaNPF7.6-A1_P1	ttgaattcgagctcggtaccAGTCATAGGAACATGTATA	atgcctcgaggtcgacCCTATCCTATAGAAATCC	Y1H assays
pAbAi_TaNPF7.6-A1_P2	ttgaattcgagctcggtaccATTTGCATAGGAAAGTTT	atgcctcgaggtcgacATAGGGTAGGAAAAATGT
pAbAi_TaNPF7.6-A1_P3	ttgaattcgagctcggtaccGAACCAAAAAAGGCTTCA	atgcctcgaggtcgacGGCGTGCCGCTGCCGCTG
pGADT7_TaEIL3	gccatggaggccagtgaattcATGATGGATAACTTAGCTATTGTCGC	atgcccacccgggtggaattcCGTTCCCAGATATTGCATCAAGT
pGEX-4T-1_GST_TaEIL3	ggttccgcgtggatccATGATGGATAACTTAGCTATTGTCGC	gtcgacccgggaattcTTACGTTCCCAGATATTGCATCAA	EMSA
pET-32a_TaJAZ1_His	cggttctggttctggccatATGGAGAGGGACTTCCTGGG	ccgcaagcttgtcgacGATGTGTAATTTTGTACTCGGGG
pGreen0800II-Dual LUC_TaNPF7.6-A1	tatagggcgaattgggtaccAGTCATAGGAACATGTATAAGT	tagaactagtggatccGGCGTGCCGCTGCCGC	Dual-luciferase reporter assay
pSuper_TaNPF7.6-A1_Myc	ccaaatcgactctagaATGGACGCGGAGGCCGGA	agcttttgctccatggtaccCCGGAGCTCGACTTTCTTCA	Dual-luciferase reporter assay
pSuper_TaEIL3_Myc	ccaaatcgactctagaATGATGGATAACTTAGCTATTGTCGC	agcttttgctccatggtaccCGTTCCCAGATATTGCATCAAGT	Dual-luciferase reporter assay
pSuper_TaJAZ1_Myc	ccaaatcgactctagaATGGAGAGGGACTTCCTGGG	agcttttgctccatggtaccGATGTGTAATTTTGTACTCGGGG	Dual-luciferase reporter assay
pBT3_STE_TaNPF7.6-A1	atctattttatgtaatggccattacggccATGGACGCGGAGGCCGGA	atcgaattcctgcagatggccgaggcggccCCGGAGCTCGACTTTCTTCA	The split- ubiquitin yeast system (DUAL membrane)
pPR3_N_TaJAZ1	tacgatgttccagattacgctggatccATGGAGAGGGACTTCCTGGG	ggtatcgataagcttgatatcgaattcGATGTGTAATTTTGTACTCGGGG
pSPYNE_TaJAZ1	cgaggacgccggcggatccATGGAGAGGGACTTCCTGGG	ctctgcaggtcgactctagaGATGTGTAATTTTGTACTCGGGG	BiFC
pSPYCE_TaNPF7.6-A1	caattacaggtacccggggatccATGGACGCGGAGGCCGGA	ctgccaccgccgtcgactctagaCCGGAGCTCGACTTTCTTCA
pSPYCE_TaEIL3	caattacaggtacccggggatccATGATGGATAACTTAGCTATTGTCGC	ctgccaccgccgtcgactctagaCGTTCCCAGATATTGCATCAAGT
pSPYNE_GUS	cgaggacgccggcggatccATGGTCCGTCCTGTAGAAAC	ctctgcaggtcgactctagaTTATTGTTTGCCTCCCTGCTGCG
pSPYCE_GUS	caattacaggtacccggggatccATGGTCCGTCCTGTAGAAAC	ctgccaccgccgtcgactctagaTTATTGTTTGCCTCCCTGCTGCG
pCAMBIA1300_TaNPF7.6-A1_cLUC	acgcgtcccggggcggtaccATGGACGCGGAGGCCGGA	agctctgcaggtcgacTCACCGGAGCTCGACTTTCTTCA	LCI assay
pCAMBIA1300_nLUC_TaJAZ1	cgggggacgagctcggtaccATGGAGAGGGACTTCCTGGG	acgagatctggtcgacGATGTGTAATTTTGTACTCGGGG
pCAMBIA1300_TaJAZ1_cLUC	acgcgtcccggggcggtaccATGGAGAGGGACTTCCTGGG	agctctgcaggtcgacTCAGATGTGTAATTTTGTACTCGGGG
pCAMBIA1300_nLUC_TaEIL3	cgggggacgagctcggtaccATGATGGATAACTTAGCTATTGTCGC	acgagatctggtcgacCGTTCCCAGATATTGCATCAAGT
pCAMBIA1300_nLUC_GUS	cgggggacgagctcggtaccATGGTCCGTCCTGTAGAAAC	acgagatctggtcgacTTATTGTTTGCCTCCCTGCTGCG
pCAMBIA1300_GUS_cLUC	acgcgtcccggggcggtaccATGGTCCGTCCTGTAGAAAC	agctctgcaggtcgacTTATTGTTTGCCTCCCTGCTGCG
pSuper_TaNPF7.6-A1_Myc	ccaaatcgactctagaATGGACGCGGAGGCCGGA	agcttttgctccatggtaccCCGGAGCTCGACTTTCTTCA	Co-IP assay
pSuper_TaJAZ1_Flag	ccaaatcgactctagaATGGAGAGGGACTTCCTGGG	tctttgtagtccatggtaccGATGTGTAATTTTGTACTCGGGG
pSuper_TaJAZ1_Myc	ccaaatcgactctagaATGGAGAGGGACTTCCTGGG	agcttttgctccatggtaccGATGTGTAATTTTGTACTCGGGG
pSuper_TaEIL3_Flag	ccaaatcgactctagaATGATGGATAACTTAGCTATTGTCGC	tctttgtagtccatggtaccCGTTCCCAGATATTGCATCAAGT
pSuper_TaJAZ1_Flag	ccaaatcgactctagaATGGAGAGGGACTTCCTGGG	tctttgtagtccatggtaccGATGTGTAATTTTGTACTCGGGG	Enrichment and detection of nuclear and cytoplasm fractions
pSuper_TaNPF7.6-A1_Myc	ccaaatcgactctagaATGGACGCGGAGGCCGGA	agcttttgctccatggtaccCCGGAGCTCGACTTTCTTCA
All primers designed for the TaNPF7.6-A1 gene produced amplification products that include two allelic types of this gene.
