# Supplementary material
Source: Research Square preprint supplement (doi:10.21203/rs.3.rs-9009137/v1)
Supplement: Supplementary file 7 [file 9aa319928aec4020eee9b0f4.xlsx]

## Sheet: Supplementary Data 2
Supplementary Data 2. Significant sites in CGAS of NUE-related agronomic traits in the years 2017-2020.
Chromosome	Position (bp)	SNP Marker name	Gene ID	Candidate gene	NUE agronomic trait	Year	Fields	LOD	add	dom	r2(%)
1A	257969412	AX-108957362	TraesCS1A02G150200	TaNPF5.5	GNA	2017-2018	NN	13.8713	0.8339		2.0664
1A	258161705	AX-94423107	TraesCS1A02G150400	TaNPF5.7	GNA	2017-2018	NN	34.3305	1.4531		2.8277
					GNA	2018-2019	NN	43.7815	1.5147		7.8605
					GNA	2019-2020	NN	25.8322	1.071		4.9643
1A	355628042	AX-111715806	TraesCS1A02G197600	TaNPF7.6	GNA	2017-2018	NN	50.8419	-1.9666	1.7542	29.7071
					GNA	2018-2019	NN	36.1395	-1.3148	3.2871	32.9433
					NAA	2018-2019	NN	8.2663	-0.682	2.6789	13.0569
1B	18386955	AX-94847672	TraesCS1B02G038700	TaNPF6.5	GNA	2017-2018	NN	8.7348	0.2473	1.5067	1.955
1B	297454472	AX-110584241	TraesCS1B02G168100	TaNPF5.7	GNA	2017-2018	LN	9.4948	-0.284	-3.061	11.2654
1B	385658911	AX-94449995	TraesCS1B02G212400	TaNPF7.7	GNA	2019-2020	NN	3.9622	-0.3502	0.4087	3.2725
1D	13041563	AX-94679893	TraesCS1D02G032700	TaNPF6.5	GNA	2018-2019	NN	7.4644	-0.523		2.8836
					NAA	2017-2018	NN	7.1289	-0.6962		3.856
1D	284048311	AX-94449995	TraesCS1D02G201200	TaNPF7.7	GNA	2019-2020	NN	3.9622	-0.3502	0.4087	3.2725
2A	768528809	AX-95225571	TraesCS2A02G571900	TaNPF5.34	GNA	2017-2018	NN	10.9632	0.7293		1.188
3A	660434378	AX-108770720	TraesCS3A02G418700	TaNPF2.4	GNA	2017-2018	NN	7.4542	-0.5004	1.0936	2.5361
					GNA	2018-2019	NN	10.6094	-0.6646	0.2143	5.1311
					NAA	2017-2018	NN	4.6375	-0.5672	0.4253	3.2375
					NAA	2018-2019	NN	4.7154	-0.5595	0.1069	4.8046
					NAA	2019-2020	NN	6.1152	-0.7535	0.1841	6.5323
					GNA	2019-2020	LN	8.9632	-0.3431	0.089	9.715
					GNA	2019-2020	NN	6.8019	-0.5313	0.0427	3.8934
3B	537467801	AX-109029004	TraesCS3B02G332100	TaNPF1.1	GNA	2017-2018	LN	5.9976	0.3361		3.3764
					NAA	2017-2018	LN	7.3931	0.4517		5.0412
6A	595062435	AX-111660589	TraesCS6A02G369900	TaNPF8.19	GNA	2017-2018	NN	17.1208	0.65	1.859	2.0305
7B	18095648	AX-109038395	TraesCS7B02G020500	TaNPF2.12	GNA	2019-2020	NN	5.273	-0.4463	0.0051	3.0337
7D	523271782	AX-111617345	TraesCS7D02G406100	TaNPF8.28	GNA	2017-2018	NN	13.7731	-0.9152	0.5682	5.7904
7D	523436088	AX-110071841	TraesCS7D02G406400	TaNPF8.27	GNA	2017-2018	LN	14.1041	-0.429	2.2382	19.0525
					NAA	2017-2018	NN	6.7842	-0.6792	0.147	6.1896
					NAA	2019-2020	LN	8.7449	-0.4028	-0.7755	13.4526
					GNA	2019-2020	NN	4.4481	-0.3886	0.9608	3.6894
