# Supplementary material
Source: Research Square preprint supplement (doi:10.21203/rs.3.rs-9009137/v1)
Supplement: Supplementary file 8 [file afafcb836316f46c2eb6562c.xlsx]

## Sheet: Supplementary Data 8
Supplementary Data 8. TaNPF7.6-A1mod-interacting candidate proteins identified by yeast two-hybrid screening.
Gene ID	Description
TraesCS3D02G541200.1	Vacuolar fusion protein MON1 homolog
TraesCS5B02G426500.1	Glycolate oxidase 1
TraesCS6B02G280300.1	Ceramide kinase
TraesCS1A02G258800.1	Tubulin beta-1 chain
TraesCS4B02G196900.1	Elongation factor 1-alpha
TraesCS2B02G472400.1	Malonyl-coenzyme A:anthocyanin 3-O-glucoside-6''-O-malonyltransferase
TraesCS6B02G148000.1	Polyubiquitin
TraesCS4A02G121300.1	Histone-lysine N-methyltransferase EZ1
TraesCS1A02G093200.1	Pre-rRNA-processing protein TSR2
TraesCS4A02G167400.1	Small ribosomal subunit protein eS28
TraesCS5A02G204900.1	Protein TIFY 6b (OsJAZ4; OsTIFY6b)
TraesCS6A02G297800.1	Pollen-specific protein C13
TraesCS7B02G129300.1	Trigger factor-like protein TIG, Chloroplastic
TraesCSU02G056900.1	Non-specific lipid-transfer protein 4.3
TraesCS7A02G040700.4	Protein argonaute 1B
TraesCS2B02G224800.1	Organic cation/carnitine transporter 7
TraesCS5B02G426500.1	Peroxisomal (S)-2-hydroxy-acid oxidase GLO1
TraesCS6D02G266300.2	KH domain-containing protein At5g56140
TraesCS1A02G239800.1	Mitochondrial fission 1 protein A
TraesCS6B02G390600.1	Photosystem II 10 kDa polypeptide, chloroplastic
TraesCS4D02G135000.7	Ribulose bisphosphate carboxylase/oxygenase activase A, chloroplastic
TraesCS4D02G109200.1	60S ribosomal protein L3
TraesCS3A02G333300.1	Tubulin beta-2 chain
TraesCS2D02G236500.2	Zeta-carotene desaturase, chloroplastic/chromoplastic
TraesCS1A02G282300.1	NADPH-dependent aldo-keto reductase, chloroplastic
TraesCS5B02G036800.1	Chloroplast stem-loop binding protein of 41 kDa b, chloroplastic (CSP41b)
TraesCS5B02G058500.1	IAA30
TraesCS7B02G209900.1	60S acidic ribosomal protein P0
TraesCS7A02G357800.1	protein_coding description:myo-inositol oxygenase 1
TraesCS3B02G370300.1	Glycerophosphodiester phosphodiesterase GDPD1, chloroplastic
TraesCS4A02G177500.1	Ribulose bisphosphate carboxylase/oxygenase activase A
TraesCS4A02G387000.1	ATP-dependent 6-phosphofructokinase 5, chloroplastic
TraesCS7B02G119700.1	CRLK2
TraesCS7D02G248600.1	Transcription termination factor MTERF6, chloroplastic/mitochondrial
TraesCS4B02G111500.1	Large ribosomal subunit protein uL3
TraesCS5D02G169600.2	Ribulose bisphosphate carboxylase small subunit, chloroplastic
TraesCS5D02G288000.1	Ransport inhibitor response 1-like protein Os11g0515500
TraesCS4D02G031600.1	Oxalate oxidase GF-2.8
