# Supplementary material
Source: Research Square preprint supplement (doi:10.21203/rs.3.rs-9009137/v1)
Supplement: Supplementary file 9 [file d56ea415d62b96f930b53dc0.xlsx]

## Sheet: Supplementary Data 11
Supplementary Data 11. NPK nutrient status in the soil before sowing at two locations from 2017 to 2020 and 2023-2025.
Years	Treatment	Determination parameter					Base fertilizer			Topdressing N
		Total N g·kg-1	Avail. N mg·kg-1	Avail. P mg·kg-1	Avail. K mg·kg-1	Organic matter g·kg-1	N kg·ha-1	P2O5 kg·ha-1	K2O kg·ha-1	N kg·ha-1
2017-2018	NN	0.63	69.15	32.23	122.4	7.68	171	129.3	45	69
	LN	0.62	60.23	32.62	124.3	7.57	0	129.3	45	0
2018-2019	NN	0.58	63.46	36.14	155.8	9.54	140.3	120	75	69.8
	LN	0.56	60.77	35.64	156.7	9.8	0	120	75	0
2019-2020	NN	0.71	64.14	38.19	143.23	10.89	154.5	120	0	69
	LN	0.68	60.7	40.14	145.46	11.14	0	120	0	0
2023-2024	NN	0.8	63.75	38.88	147.22	10.5	156.3	60.3	68.25	104.25
	LN	0.71	57.03	44.31	119.33	10.41	0	51.3	109.05	34.5
2024-2025	NN	0.71	56.48	23.98	124.15	10.35	154.65	85.5	102	103.2
	LN	0.67	53.25	16.41	146.35	10.29	0	66	32.1	34.5
