# Supplementary material
Source: Research Square preprint supplement (doi:10.21203/rs.3.rs-9009137/v1)
Supplement: Supplementary file 10 [file e08402b2b46f47a34c21cdfa.xlsx]

## Sheet: Supplemental Data 13
Supplemental Data 13. The recipe of nutrient solution.
Mineral salt	Mol. Wt.	Stock. Conc.	Work. Conc.	Stock volume for 1L work solution
NO3- Conc.	-	-	-	2.0mM	1mM	0.2mM	0mM
Ca (NO3)2·4H2O	236.15	1M	-	1000μL	500μL	100μL	0μL
CaCl2·2H2O	147.01	3M	-	500μL	667μL	800μL	833μL
KCl	74.55	3M	1.5mM	0.5mL	0.5mL	0.5mL	0.5mL
MgSO4·7H2O	246.47	1M	1mM	1mL	1mL	1mL	1mL
KH2PO4	136.09	0.2M	0.2mM	1mL	1mL	1mL	1mL
Fe (III)-EDTA·xH2O	367.05	0.1M	0.1mM	1mL	1mL	1mL	1mL
H3BO3	61.83	10mM	1μM	100μL	100μL	100μL	100μL
ZnSO4·7H2O	287.56	10mM	1μM	100μL	100μL	100μL	100μL
MnSO4·H2O	169.02	10mM	1μM	100μL	100μL	100μL	100μL
CuSO4·5H2O	249.69	10mM	0.5μM	50μL	50μL	50μL	50μL
Na2MoO4·2H2O	241.95	10mM	0.35μM	35μL	35μL	35μL	35μL
Mol. Wt.: molecular weight, Stock. Conc.: concentration of stock solution, Work. Conc.: concentration of work solution. pH is adjusted to 5.5~5.8.
