# Supplementary material
Source: Research Square preprint supplement (doi:10.21203/rs.3.rs-9009137/v1)
Supplement: Supplementary file 11 [file e9995cfd9440871ce4bb5da8.xlsx]

## Sheet: Supplementary Data 3 
Supplementary Data 3. List of SNPs associated with GAN and NAA identified by GWAS.
Trait name	Year	Fields	Marker	Chromosome	Position (bp)	LOD	add	dom	variance	r2(%)	P-value	significance
NAA	2017-2018	NN	AX-94961261	1A	9580078	18.1102	-0.6933	-0.4934	0.1288	1.768	7.77022239619544e-19	SIG
NAA	2017-2018	NN	AX-110691428	1A	326592397	20.2779	-0.6304	0.1832	0.341	4.6828	5.28216436682609e-21	SIG
NAA	2017-2018	NN	AX-111733802	1A	353914935	9.3463	0.214	1.8037	0.1438	1.9741	4.50850745615748e-10	SIG
NAA	2017-2018	NN	AX-109374522	1A	505063981	6.4271	-0.1557	2.1672	0.0978	1.3427	3.74188492620548e-07	SUG
NAA	2017-2018	NN	AX-109012711	1A	568007497	4.7947	0.273	NA	0.0586	0.804	2.6156077303884e-06	SUG
NAA	2017-2018	NN	AX-111657431	1D	125821699	11.6617	0.2866	1.2583	0.1054	1.4475	2.18136358907449e-12	SIG
NAA	2017-2018	NN	AX-111466762	2A	13130939	4.1682	0.0681	0.4839	0.0474	0.6513	6.79173803320049e-05	SUG
NAA	2017-2018	NN	AX-110130289	2A	380944531	7.7376	0.0427	-1.2468	0.1159	1.5912	1.83110480882025e-08	SIG
NAA	2017-2018	NN	AX-109466750	2A	578889835	10.6553	-0.4341	0.2572	0.1187	1.6304	2.21382018101141e-11	SIG
NAA	2017-2018	NN	AX-111698405	2A	751519935	6.9396	-0.1667	0.672	0.1094	1.5022	1.14997703228992e-07	SIG
NAA	2017-2018	NN	AX-111820053	3B	394269433	5.4829	0.2391	0.5687	0.0713	0.9788	3.29077463337232e-06	SUG
NAA	2017-2018	NN	AX-108931244	4B	654426235	6.8334	0.0518	-0.8112	0.0941	1.2915	1.46857992525621e-07	SUG
NAA	2017-2018	NN	AX-111127742	4D	58985089	8.591	0.2497	-0.8782	0.1383	1.8985	2.56654909625747e-09	SIG
NAA	2017-2018	NN	AX-109581127	5B	587113943	9.3572	-0.3923	-0.0143	0.123	1.6885	4.39704454343239e-10	SIG
NAA	2017-2018	NN	AX-111032828	7A	440352140	8.4048	0.0245	3.2961	0.1333	1.8308	3.94012874903888e-09	SIG
NAA	2017-2018	NN	AX-110051118	7A	540876630	10.4946	-0.1194	-0.7338	0.1196	1.6424	3.20468350471397e-11	SIG
NAA	2017-2018	NN	AX-108753823	7B	24401942	5.8053	-0.0005	0.8052	0.0784	1.0758	1.56658500992077e-06	SUG
NAA	2017-2018	NN	AX-110611856	7B	613591566	11.1654	0.0023	1.0194	0.1518	2.0841	6.83940791182945e-12	SIG
NAA	2017-2018	NN	AX-111012995	7B	684374292	10.0999	-0.0339	1.1146	0.1482	2.0352	7.95158642824254e-11	SIG
NAA	2017-2018	LN	AX-94887388	1A	1235919	17.4523	-0.4335	NA	0.0787	5.0974	3.10781637761477e-19	SIG
NAA	2017-2018	LN	AX-111541821	2A	78216784	5.7655	-0.0385	-1.1474	0.0515	3.3328	1.7166117857686e-06	SUG
NAA	2017-2018	LN	AX-109815252	2A	751226206	5.7601	-0.0804	1.1537	0.0553	3.5799	1.73810879196042e-06	SUG
NAA	2017-2018	LN	AX-109845794	2A	767143161	4.6332	-0.2067	-0.2584	0.032	2.0739	2.32784661323951e-05	SUG
NAA	2017-2018	LN	AX-108957871	3B	161443972	3.1096	0.1706	NA	0.0211	1.3666	0.000154225516725204	SUG
NAA	2017-2018	LN	AX-109014518	3B	166752399	5.0987	0.0365	1.0753	0.0462	2.9905	7.9701319029364e-06	SUG
NAA	2017-2018	LN	AX-108841819	4A	11805883	9.6612	-0.0888	1.472	0.0963	6.2373	2.18329215243953e-10	SIG
NAA	2017-2018	LN	AX-111045486	4B	659002106	13.1423	-0.0151	0.8666	0.1114	7.2121	7.21432476532237e-14	SIG
NAA	2017-2018	LN	AX-111550305	6B	591229033	5.0776	-0.019	-0.5	0.0381	2.4696	8.36674529832706e-06	SUG
NAA	2017-2018	LN	AX-108945572	7A	20675185	24.0442	-0.5359	0.032	0.0548	3.5463	9.05026989707658e-25	SIG
NAA	2017-2018	LN	AX-111622654	7A	696397065	5.9929	-0.0065	2.652	0.0574	3.7154	1.01697945154125e-06	SUG
NAA	2017-2018	LN	AX-94662415	UN	62917249	8.0324	0.3907	-0.0076	0.0787	5.0961	9.28653331531086e-09	SIG
NAA	2018-2019	NN	AX-109450940	1A	592127011	13.4231	-0.5699	-0.6685	0.2533	6.3519	3.77920696783465e-14	SIG
NAA	2018-2019	NN	AX-109990568	2A	721562910	10.8702	-0.6357	0.4214	0.1922	4.8191	1.34949298835819e-11	SIG
NAA	2018-2019	NN	AX-109339147	2B	31299872	4.1837	-0.027	-1.3201	0.0876	2.1974	6.55258599731366e-05	SUG
NAA	2018-2019	NN	AX-108827324	3A	645615933	9.1484	0.6127	-0.1678	0.154	3.8606	7.11039221690191e-10	SIG
NAA	2018-2019	NN	AX-109341620	3A	732772076	10.5704	-0.2757	1.9083	0.2485	6.2322	2.69172702392402e-11	SIG
NAA	2018-2019	NN	AX-109814788	3B	571750303	4.4679	0.0957	-0.7704	0.0915	2.2934	3.40594546826286e-05	SUG
NAA	2018-2019	NN	AX-110368177	4A	9453159	11.3251	-0.5821	0.0498	0.1739	4.3609	4.73541860667959e-12	SIG
NAA	2018-2019	NN	AX-94633529	4A	89441264	8.3195	-0.44	NA	0.1224	3.0679	6.03157453907142e-10	SIG
NAA	2018-2019	NN	AX-109392972	5B	486238429	6.0537	0.5002	-0.2269	0.1357	3.4015	8.84152489482254e-07	SUG
NAA	2018-2019	NN	AX-110593028	6A	564974058	6.2391	-0.1587	-1.7888	0.119	2.9846	5.76943100659623e-07	SUG
NAA	2018-2019	NN	AX-110130858	6B	358106442	13.4003	0.3363	3.253	0.2864	7.1807	3.98285703782e-14	SIG
NAA	2018-2019	NN	AX-108751007	6B	526486640	14.5588	0.8357	0.2787	0.1698	4.2571	2.76531084038255e-15	SIG
NAA	2018-2019	NN	AX-111626397	6B	570141419	4.1994	0.1637	1.8172	0.0643	1.6123	6.32077959253945e-05	SUG
NAA	2018-2019	NN	AX-111185507	7A	19081227	7.884	0.0437	3.3208	0.1785	4.4759	1.3070943843205e-08	SIG
NAA	2018-2019	LN	AX-110007441	1A	342142474	11.913	0.0867	-1.0491	0.0717	6.0037	1.22309470576163e-12	SIG
NAA	2018-2019	LN	AX-110924513	1A	520317944	7.637	0.0277	0.9213	0.0433	3.6293	2.30807251170183e-08	SIG
NAA	2018-2019	LN	AX-111084404	1B	14845844	7.5016	0.1135	0.7096	0.0426	3.5702	3.15281742175141e-08	SIG
NAA	2018-2019	LN	AX-109956683	1B	675375158	8.5957	0.0644	0.4984	0.0335	2.8085	2.53851090137325e-09	SIG
NAA	2018-2019	LN	AX-111590780	2A	483943410	4.3836	0.0238	-0.7449	0.0244	2.0463	4.13610506409576e-05	SUG
NAA	2018-2019	LN	AX-110523441	2B	780667998	11.2498	0.3742	0.0678	0.0608	5.0924	5.63182608407313e-12	SIG
NAA	2018-2019	LN	AX-110945593	3B	211068354	5.8823	-0.0598	1.9525	0.0347	2.9058	1.31189130939264e-06	SUG
NAA	2018-2019	LN	AX-109354910	3B	357028702	9.1186	-0.122	0.7746	0.0542	4.5423	7.61675508959704e-10	SIG
NAA	2018-2019	LN	AX-110382046	3B	764387952	5.8248	-0.0529	0.7444	0.0341	2.8551	1.49750234779379e-06	SUG
NAA	2018-2019	LN	AX-111700713	4A	61652781	6.5555	-0.0825	-0.9948	0.03	2.5153	2.78430668576695e-07	SUG
NAA	2018-2019	LN	AX-111468820	4B	286170683	6.7784	-0.0734	1.0366	0.0404	3.3859	1.66657129834013e-07	SUG
NAA	2018-2019	LN	AX-94683245	5A	472342782	10.8467	0.2595	NA	0.0601	5.0311	1.57795472924445e-12	SIG
NAA	2018-2019	LN	AX-95183843	5B	261348750	5.0689	-0.0416	0.2834	0.0227	1.8982	8.53625235272649e-06	SUG
NAA	2018-2019	LN	AX-109927827	5B	595349232	5.6587	-0.1854	0.1584	0.0276	2.3151	2.19518909223569e-06	SUG
NAA	2018-2019	LN	AX-94757342	5D	267855063	6.468	-0.1961	NA	0.0312	2.6137	4.82709292374766e-08	SIG
NAA	2018-2019	LN	AX-109317303	6A	2063357	4.2393	-0.1775	-0.0482	0.024	2.0079	5.7657287964912e-05	SUG
NAA	2018-2019	LN	AX-109422752	7A	20604036	6.7669	0.038	-0.9299	0.0395	3.31	1.7113253372527e-07	SUG
NAA	2018-2019	LN	AX-110388468	7B	540521860	5.9732	0.0606	-1.0527	0.0351	2.9434	1.06419642259218e-06	SUG
NAA	2019-2020	NN	AX-110595595	1B	460127987	14.5837	0.7638	-0.1074	0.3436	6.3687	2.61109617876959e-15	SIG
NAA	2019-2020	NN	AX-110381827	2B	652705783	5.626	-0.0906	-1.0132	0.1065	1.9739	2.36724203948073e-06	SUG
NAA	2019-2020	NN	AX-108869174	3A	587718774	6.915	0.0731	1.5653	0.1411	2.6159	1.21679401271162e-07	SIG
NAA	2019-2020	NN	AX-109861452	3B	94861267	18.4734	0.7002	-0.5006	0.1392	2.5802	3.36761695272988e-19	SIG
NAA	2019-2020	NN	AX-108813535	3B	678549369	9.0884	-0.0818	1.0503	0.1921	3.5609	8.1650746408992e-10	SIG
NAA	2019-2020	NN	AX-110365850	4A	613811576	5.7458	-0.1971	1.6595	0.1142	2.1172	1.79653187942859e-06	SUG
NAA	2019-2020	NN	AX-110659006	4A	617002850	5.3264	-0.3436	NA	0.1013	1.8774	7.32330423734199e-07	SUG
NAA	2019-2020	NN	AX-108968949	4A	660700140	7.555	0.3548	1.4017	0.125	2.3165	2.78812767516948e-08	SIG
NAA	2019-2020	NN	AX-94771987	5B	616972818	9.0071	0.1002	-1.0267	0.187	3.4664	9.84606138211946e-10	SIG
NAA	2019-2020	NN	AX-110950087	6A	83609120	8.2911	-0.0865	-1.2185	0.1652	3.0614	5.11950475766772e-09	SIG
NAA	2019-2020	NN	AX-94707283	6B	288943430	6.7913	-0.2085	0.5914	0.1128	2.0905	1.6179939986185e-07	SUG
NAA	2019-2020	NN	AX-108923681	6B	475725836	9.5219	-0.1294	4.0659	0.2197	4.0719	3.00941314910048e-10	SIG
NAA	2019-2020	NN	AX-110368557	6B	668269958	8.1476	-0.2585	-1.9208	0.1792	3.3216	7.12435413364192e-09	SIG
NAA	2019-2020	NN	AX-111527332	7A	454684617	7.2396	-0.0615	3.1216	0.1618	2.9994	5.76329241415328e-08	SIG
NAA	2019-2020	NN	AX-95078936	7A	712622998	12.3863	-0.1208	-2.755	0.2633	4.8799	4.11326127500126e-13	SIG
NAA	2019-2020	NN	AX-109918064	7A	717474736	10.7097	0.5038	-0.2701	0.2001	3.7086	1.95297738369635e-11	SIG
NAA	2019-2020	NN	AX-108976625	7B	718933096	3.8911	-0.0054	3.2211	0.0844	1.5647	0.000128547664086699	SUG
NAA	2019-2020	NN	AX-94687368	7B	733144355	15.9952	-0.8559	-0.0176	0.2996	5.5539	1.01257621414983e-16	SIG
NAA	2019-2020	LN	AX-109480317	1A	3256986	7.5315	-0.1074	1.0649	0.0204	1.6699	2.94319950986074e-08	SIG
NAA	2019-2020	LN	AX-108987252	1A	13675770	6.1481	0.0307	0.69	0.0176	1.4422	7.11479817401206e-07	SUG
NAA	2019-2020	LN	AX-111484342	1A	438297116	5.6287	0.0509	0.4821	0.0169	1.381	2.35223464608962e-06	SUG
NAA	2019-2020	LN	AX-109534161	1A	519253053	9.1099	0.0014	1.378	0.0306	2.5031	7.77006274294965e-10	SIG
NAA	2019-2020	LN	AX-109058910	1B	181265421	10.5447	0.0186	1.2133	0.0344	2.815	2.85586343408575e-11	SIG
NAA	2019-2020	LN	AX-111825406	1B	418681349	15.3495	-0.072	0.5533	0.0539	4.4021	4.47815081357295e-16	SIG
NAA	2019-2020	LN	AX-111076949	1B	591662420	10.7372	-0.019	1.1345	0.0367	3.0018	1.83329754474479e-11	SIG
NAA	2019-2020	LN	AX-89729848	2A	36878667	10.4699	-0.1798	0.9948	0.0231	1.8907	3.39209236200734e-11	SIG
NAA	2019-2020	LN	AX-110412196	2A	69302350	3.7018	-0.0573	0.8443	0.0119	0.9762	0.000198759984206344	SUG
NAA	2019-2020	LN	AX-111689613	2A	559820937	5.1421	-0.0052	-0.563	0.016	1.305	7.21305898373522e-06	SUG
NAA	2019-2020	LN	AX-110374373	2A	715380531	13.3663	-0.1414	0.5838	0.0452	3.6971	4.30712605583875e-14	SIG
NAA	2019-2020	LN	AX-109405720	2B	25980102	3.7023	-0.0209	0.8404	0.0119	0.9706	0.000198516016816232	SUG
NAA	2019-2020	LN	AX-110985258	2B	178702049	5.619	-0.0905	0.5111	0.0185	1.5159	2.40527477764688e-06	SUG
NAA	2019-2020	LN	AX-110471573	2B	753837087	4.5243	-0.0238	-0.9318	0.0144	1.1767	2.99105623509241e-05	SUG
NAA	2019-2020	LN	AX-110984396	2B	800187094	6.8835	0.0892	0.862	0.0181	1.482	1.3085078469631e-07	SIG
NAA	2019-2020	LN	AX-108869174	3A	587718774	6.1552	-0.0303	0.5643	0.0198	1.6215	6.99930206192803e-07	SUG
NAA	2019-2020	LN	AX-111070487	4A	102890804	5.1042	-0.0487	-0.595	0.0153	1.2516	7.86939175702674e-06	SUG
NAA	2019-2020	LN	AX-109541040	4B	657811156	12.2616	0.0467	-0.5528	0.04	3.2704	5.48136631868259e-13	SIG
NAA	2019-2020	LN	AX-109917638	5B	532604110	6.3447	-0.077	0.5201	0.021	1.7148	4.52439988608603e-07	SUG
NAA	2019-2020	LN	AX-110553427	5B	600119441	19.0062	0.2158	0.5003	0.0096	0.786	9.87517313868871e-20	SIG
NAA	2019-2020	LN	AX-109415489	5B	684231975	6.4732	0.0874	-0.5393	0.0215	1.7567	3.3650642548288e-07	SUG
NAA	2019-2020	LN	AX-109315382	6B	524338232	7.6739	0.0846	-0.959	0.0229	1.8737	2.12036274234076e-08	SIG
NAA	2019-2020	LN	AX-94381299	6B	704039491	6.5814	-0.0632	-1.4814	0.0207	1.6944	2.62351687794238e-07	SUG
NAA	2019-2020	LN	AX-94396508	7B	499463279	18.611	-0.2643	NA	0.0351	2.8721	2.09008265375569e-20	SIG
NAA	2019-2020	LN	AX-110363434	7B	701122822	9.8719	0.0774	0.5756	0.0207	1.6934	1.34435748064005e-10	SIG
NAAblup			AX-111183991	1A	482970383	5.7763	-0.0244	0.1868	0.0053	0.8456	1.67470594997042e-06	SUG
NAAblup			AX-111627791	1A	543965260	14.7489	-0.1231	-0.1789	0.0153	2.425	1.78485546770238e-15	SIG
NAAblup			AX-110164623	1A	592658038	5.5436	-0.0065	-0.5653	0.0051	0.8125	2.8614006452371e-06	SUG
NAAblup			AX-94829936	1B	589489117	9.7941	-0.0528	-0.2433	0.0076	1.1997	1.60785619443673e-10	SIG
NAAblup			AX-108769880	1B	668124597	14.2775	0.1224	-0.0165	0.0145	2.3034	5.28471040008798e-15	SIG
NAAblup			AX-109387920	2A	5111463	13.5682	-0.1165	0.1422	0.013	2.0627	2.70609230051801e-14	SIG
NAAblup			AX-110533099	2A	104043566	8.3198	0.0917	0.0136	0.0074	1.1762	4.79163641744143e-09	SIG
NAAblup			AX-109486605	2A	148165280	11.1797	-0.0256	0.2183	0.0089	1.4032	6.6171470084104e-12	SIG
NAAblup			AX-109418079	2A	540245847	4.3287	-0.0123	0.3264	0.004	0.6269	4.69276403949035e-05	SUG
NAAblup			AX-108964116	2A	555695169	4.3086	0.0207	0.2724	0.0038	0.6089	4.91576146180594e-05	SUG
NAAblup			AX-109299844	2B	26857217	20.8338	-0.0395	0.2936	0.0177	2.8025	1.46889835253481e-21	SIG
NAAblup			AX-110381827	2B	652705783	6.8833	0.0483	-0.1997	0.0065	1.0286	1.30912705596093e-07	SIG
NAAblup			AX-95083924	2D	577315458	18.1346	-0.1398	NA	0.0154	2.4434	6.34063354146369e-20	SIG
NAAblup			AX-108788179	3A	207483	29.9974	-0.0982	-0.2242	0.0094	1.4909	1.008465432299e-30	SIG
NAAblup			AX-94404298	3A	7926608	10.7037	0.0098	0.3695	0.0094	1.4848	1.98014811963162e-11	SIG
NAAblup			AX-111477108	3B	22204508	12.0896	-0.0387	-0.2807	0.0098	1.5595	8.14464243533173e-13	SIG
NAAblup			AX-94750060	3B	26650267	13.3628	-0.1172	NA	0.0069	1.0946	4.3475800336712e-15	SIG
NAAblup			AX-110946553	3B	754169959	24.4587	-0.1685	0.0589	0.0187	2.9698	3.48522277274864e-25	SIG
NAAblup			AX-111187499	4A	6895773	5.192	-0.0702	NA	0.0048	0.7531	1.00979076804322e-06	SUG
NAAblup			AX-110492648	4A	663368503	19.0812	-0.1444	-0.1113	0.0158	2.498	8.30859199985824e-20	SIG
NAAblup			AX-110546271	4A	684608793	5.2521	-0.0448	0.1437	0.005	0.7896	5.59827619197508e-06	SUG
NAAblup			AX-94987708	4A	701872805	10.5886	-0.1029	NA	0.0055	0.8634	2.89187138745729e-12	SIG
NAAblup			AX-111625343	5B	24777776	25.9509	-0.1739	NA	0.0115	1.8254	8.12371430621994e-28	SIG
NAAblup			AX-111691115	5B	415510987	8.0957	0.0181	-0.6083	0.0078	1.2381	8.02745414281647e-09	SIG
NAAblup			AX-109489236	6A	106499926	6.7441	-0.0088	0.3037	0.0061	0.9713	1.80374919959059e-07	SUG
NAAblup			AX-108848147	6B	229531402	16.8022	0.0049	0.2348	0.0118	1.8639	1.57909755244927e-17	SIG
NAAblup			AX-95107578	7D	205542477	12.4399	0.1225	0.0415	0.0047	0.7479	3.63505814247228e-13	SIG
GNA	2017-2018	NN	AX-109643322	1A	166990800	15.3206	0.5309	0.1959	0.1129	0.8747	4.78638865548354e-16	SIG
GNA	2017-2018	NN	AX-109367408	1A	320265076	10.4375	0.086	-3.1732	0.1312	1.0166	3.65512747242456e-11	SIG
GNA	2017-2018	NN	AX-110377494	1A	534204375	19.6162	-0.5192	-0.6609	0.1334	1.0337	2.42392542481829e-20	SIG
GNA	2017-2018	NN	AX-109036481	1A	591016581	8.82	0.1009	-2.1989	0.109	0.8443	1.5146939552491e-09	SIG
GNA	2017-2018	NN	AX-109825296	1B	4296321	14.9175	-0.2334	0.8331	0.196	1.5181	1.21077061352481e-15	SIG
GNA	2017-2018	NN	AX-108934860	2A	70146016	13.822	0.2314	1.2052	0.1529	1.1842	1.50846190564743e-14	SIG
GNA	2017-2018	NN	AX-109971046	2A	602689245	12.5995	0.4148	-0.3126	0.1569	1.2156	2.51742128113008e-13	SIG
GNA	2017-2018	NN	AX-108860387	2B	595707451	20.2176	-0.585	-0.1361	0.2477	1.919	6.06918122447861e-21	SIG
GNA	2017-2018	NN	AX-110907472	4A	626504392	7.0111	0.0332	0.8013	0.0735	0.5695	9.75271520547095e-08	SIG
GNA	2017-2018	NN	AX-108916749	4D	19090268	10.7372	-0.3625	-1.0905	0.1182	0.9153	1.83335001538766e-11	SIG
GNA	2017-2018	NN	AX-109880491	4D	455754671	9.2857	-0.3518	0.0974	0.0916	0.7099	5.18319176889711e-10	SIG
GNA	2017-2018	NN	AX-110583318	5A	536817689	23.1339	0.5536	0.84	0.3005	2.3279	7.36200372699064e-24	SIG
GNA	2017-2018	NN	AX-109200782	5D	562047623	6.2374	-0.0889	0.6722	0.0694	0.5375	5.79140251517053e-07	SUG
GNA	2017-2018	NN	AX-110063373	6A	617402073	13.2258	-0.4236	-0.0538	0.1281	0.9923	5.9519148534347e-14	SIG
GNA	2017-2018	NN	AX-111911939	6D	531099	11.6965	-0.4145	0.1967	0.1013	0.7843	2.01330435953711e-12	SIG
GNA	2017-2018	NN	AX-111798471	7A	450007854	4.2509	-0.0145	-0.6492	0.0444	0.344	5.61350322918012e-05	SUG
GNA	2017-2018	NN	AX-108815780	7A	612765745	12.5534	0.0446	0.5379	0.0714	0.5534	2.79935987044396e-13	SIG
GNA	2017-2018	NN	AX-110958973	7A	695641406	12.0044	0.432	0.1127	0.1059	0.8203	9.91012737445685e-13	SIG
GNA	2017-2018	NN	AX-108927862	7B	613516470	4.6417	0.058	0.6213	0.0476	0.3683	2.28295854953039e-05	SUG
GNA	2017-2018	NN	AX-109321709	7D	504909092	17.1814	-0.4958	0.1234	0.1325	1.0265	6.59576880745457e-18	SIG
GNA	2017-2018	LN	AX-109365060	1A	399489314	3.7988	0.0205	1.3062	0.0137	1.0734	0.000158983914292493	SUG
GNA	2017-2018	LN	AX-111008501	1B	484377899	5.1471	0.0156	-0.5459	0.0186	1.459	7.13030744538515e-06	SUG
GNA	2017-2018	LN	AX-109933481	1B	551117953	9.7852	0.0125	1.7845	0.0384	3.0122	1.64111822651577e-10	SIG
GNA	2017-2018	LN	AX-110059547	2A	740097978	5.7571	-0.043	0.5594	0.022	1.7221	1.75017870589336e-06	SUG
GNA	2017-2018	LN	AX-109349888	2A	746748181	5.0263	0.0035	0.2237	0.0117	0.9149	9.416001874662e-06	SUG
GNA	2017-2018	LN	AX-111037807	3A	595278328	8.9711	-0.1891	NA	0.0159	1.2427	1.29761767575635e-10	SIG
GNA	2017-2018	LN	AX-110463615	3B	10573562	8.7607	0.0511	0.2676	0.0185	1.4473	1.7363397810103e-09	SIG
GNA	2017-2018	LN	AX-108957871	3B	161443972	9.805	0.1985	NA	0.0286	2.2372	1.82328907251566e-11	SIG
GNA	2017-2018	LN	AX-110375817	3B	317629352	8.3974	0.0911	0.5342	0.0299	2.3452	4.00795221429683e-09	SIG
GNA	2017-2018	LN	AX-109442328	3B	382830160	15.904	-0.1186	1.2861	0.0673	5.275	1.24905540110118e-16	SIG
GNA	2017-2018	LN	AX-110033935	4A	689265444	5.3974	0.0668	-0.4626	0.0206	1.6161	4.00708983045621e-06	SUG
GNA	2017-2018	LN	AX-109990777	4B	32277727	5.3665	-0.0124	0.477	0.019	1.4876	4.30229237176336e-06	SUG
GNA	2017-2018	LN	AX-109494335	4B	49739952	7.4612	-0.0709	1.219	0.028	2.1923	3.45996072366654e-08	SIG
GNA	2017-2018	LN	AX-111078036	4B	542748393	12.3056	0.0183	-0.8501	0.0478	3.7483	4.95236137402438e-13	SIG
GNA	2017-2018	LN	AX-111818682	4D	66036879	23.6162	0.3341	-0.2837	0.0358	2.807	2.4249908094544e-24	SIG
GNA	2017-2018	LN	AX-109322153	5B	514285277	9.9833	-0.0202	1.0385	0.0394	3.084	1.04015596436087e-10	SIG
GNA	2017-2018	LN	AX-110017534	6B	44388881	13.8331	-0.2419	-0.0535	0.0302	2.3656	1.4702390420612e-14	SIG
GNA	2017-2018	LN	AX-109392965	7A	34308947	18.9723	0.3651	-0.1018	0.0707	5.5401	1.06746851945575e-19	SIG
GNA	2017-2018	LN	AX-109651556	7A	115714012	12.7262	0.0741	-0.7814	0.0519	4.067	1.8806944149041e-13	SIG
GNA	2017-2018	LN	AX-111622654	7A	696397065	6.5816	-0.0389	1.7156	0.0255	1.9985	2.62188776257963e-07	SUG
GNA	2017-2018	LN	AX-110590541	7B	54500439	6.1067	-0.0877	-0.7515	0.0231	1.8094	7.82549765817498e-07	SUG
GNA	2018-2019	NN	AX-94998366	1B	674079901	9.0072	0.2803	NA	0.0706	1.2924	1.1918973022766e-10	SIG
GNA	2018-2019	NN	AX-109445662	2A	507605936	4.9095	0.0112	-0.5878	0.0369	0.675	1.23211842950256e-05	SUG
GNA	2018-2019	NN	AX-110408514	2B	132611215	9.7981	0.1361	-0.9945	0.0845	1.5474	1.59333668485693e-10	SIG
GNA	2018-2019	NN	AX-111589457	3A	1767373	15.9152	-0.4101	-0.1175	0.0901	1.6504	1.21737267375024e-16	SIG
GNA	2018-2019	NN	AX-111078822	3B	481875556	6.8647	0.2431	0.2306	0.0426	0.7808	1.36629619724296e-07	SIG
GNA	2018-2019	NN	AX-94633529	4A	89441264	11.5766	-0.3218	NA	0.0655	1.1991	2.8484668809356e-13	SIG
GNA	2018-2019	NN	AX-110972079	4B	531965089	5.1921	0.0963	1.2992	0.04	0.7335	6.42774735983621e-06	SUG
GNA	2018-2019	NN	AX-109300036	5A	64362236	5.984	0.0184	-0.3602	0.0328	0.6015	1.03816840615358e-06	SUG
GNA	2018-2019	NN	AX-108756030	5A	452081951	16.7962	0.0408	1.1291	0.1316	2.4097	1.6011810403704e-17	SIG
GNA	2018-2019	NN	AX-111799200	5A	480782235	12.449	-0.3352	NA	0.1055	1.933	3.68959276084662e-14	SIG
GNA	2018-2019	NN	AX-109460037	5A	555062478	13.915	0.1673	0.6524	0.0765	1.4019	1.21756922224292e-14	SIG
GNA	2018-2019	NN	AX-110714002	5A	556082752	6.2515	0.007	-0.8482	0.0498	0.9113	5.60724503181263e-07	SUG
GNA	2018-2019	NN	AX-108910713	5D	486935936	24.123	-0.4955	0.1037	0.1271	2.3274	7.54904552035542e-25	SIG
GNA	2018-2019	NN	AX-94903488	6B	9036289	8.5268	0.0037	0.8033	0.0653	1.1957	2.97526297443351e-09	SIG
GNA	2018-2019	NN	AX-111706502	6B	549417240	6.362	0.1119	0.7807	0.0438	0.8019	4.34783548034707e-07	SUG
GNA	2018-2019	NN	AX-110675643	6B	568273150	9.2107	-0.031	0.4936	0.0598	1.0949	6.16067468149434e-10	SIG
GNA	2018-2019	NN	AX-109950883	6D	1796472	10.5925	-0.0937	0.8985	0.0928	1.6994	2.55811465560221e-11	SIG
GNA	2018-2019	NN	AX-111185507	7A	19081227	7.1901	0.0839	1.827	0.0592	1.0847	6.45956230413496e-08	SIG
GNA	2018-2019	NN	AX-94741081	7A	77434667	7.0326	-0.2617	-0.0845	0.051	0.9332	9.28169888995583e-08	SIG
GNA	2018-2019	LN	AX-110007441	1A	342142474	7.416	0.06	-0.6906	0.0314	3.1486	3.83928901953875e-08	SIG
GNA	2018-2019	LN	AX-109471840	1A	473632108	10.5281	0.0243	-1.2008	0.047	4.7129	2.96666069732803e-11	SIG
GNA	2018-2019	LN	AX-110979323	1A	494727195	4.2177	0.0925	-0.2733	0.0178	1.7838	6.05924758835341e-05	SUG
GNA	2018-2019	LN	AX-109277510	1A	508721503	6.2515	-0.0886	1.0919	0.0266	2.6694	5.60650289667616e-07	SUG
GNA	2018-2019	LN	AX-108791726	2A	71616855	21.019	-0.2268	-0.6199	0.0275	2.7607	9.58937846269472e-22	SIG
GNA	2018-2019	LN	AX-109554858	2A	198756992	3.6698	-0.0191	0.5353	0.0149	1.4977	0.000213980970070866	SUG
GNA	2018-2019	LN	AX-109645731	2D	533202879	21.51	-0.326	-0.4151	0.0879	8.8077	3.09581907563814e-22	SIG
GNA	2018-2019	LN	AX-108847051	3A	16070421	10.0253	0.0602	0.3662	0.0235	2.3589	9.44142775389811e-11	SIG
GNA	2018-2019	LN	AX-111665439	3B	163709372	6.3667	0.0526	0.5551	0.0256	2.5656	4.30101874197883e-07	SUG
GNA	2018-2019	LN	AX-110945593	3B	211068354	4.8485	0.0488	1.5022	0.0206	2.0595	1.41795991964799e-05	SUG
GNA	2018-2019	LN	AX-109332913	4A	701527913	6.4853	-0.1676	0.1973	0.0257	2.5748	3.27265644816574e-07	SUG
GNA	2018-2019	LN	AX-110006837	4B	290162602	5.3418	-0.0397	0.5016	0.0228	2.286	4.55419714740849e-06	SUG
GNA	2018-2019	LN	AX-110407151	4B	644863285	8.173	-0.0812	0.4623	0.0329	3.3011	6.71894626133762e-09	SIG
GNA	2018-2019	LN	AX-110826764	4D	204763482	5.1773	-0.1794	-0.0115	0.0153	1.5371	6.65104089017496e-06	SUG
GNA	2018-2019	LN	AX-111514303	5A	30093159	24.7717	0.3619	-0.2378	0.1256	12.5868	1.69501539226231e-25	SIG
GNA	2018-2019	LN	AX-109308514	5B	551499624	13.9973	0.2558	0.2917	0.036	3.6086	1.00747327763715e-14	SIG
GNA	2018-2019	LN	AX-108772491	5B	709211390	12.577	-0.2419	-0.0765	0.0281	2.8158	2.65128998878131e-13	SIG
GNA	2018-2019	LN	AX-111258840	6A	512836844	10.0302	-0.213	NA	0.0263	2.6398	1.07365223252244e-11	SIG
GNA	2018-2019	LN	AX-109422752	7A	20604036	6.3448	0.0336	-0.7683	0.0272	2.721	4.52357987873203e-07	SUG
GNA	2018-2019	LN	AX-109915458	7A	497245578	4.5102	0.0787	-0.3263	0.0178	1.7863	3.08995050740978e-05	SUG
GNA	2019-2020	NN	AX-95679719	1A	528668864	21.07	0.3414	0.3098	0.091	2.1048	8.52761666494444e-22	SIG
GNA	2019-2020	NN	AX-111468246	1A	583261569	20.1019	-0.0507	0.9135	0.1022	2.3658	7.92229986551919e-21	SIG
GNA	2019-2020	NN	AX-109933433	1D	42386464	27.2403	0.4629	0.1502	0.0796	1.8411	5.76312449589838e-28	SIG
GNA	2019-2020	NN	AX-111803081	2A	1583373	6.1076	0.0346	0.6928	0.024	0.5551	7.80899292708383e-07	SUG
GNA	2019-2020	NN	AX-108830573	2A	625566683	10.6163	-0.1533	0.7481	0.0516	1.1943	2.42167135395411e-11	SIG
GNA	2019-2020	NN	AX-111698444	2A	628741501	12.5301	0.0848	2.1246	0.0581	1.3454	2.95371893789347e-13	SIG
GNA	2019-2020	NN	AX-110531324	2B	58322090	11.0709	-0.1927	-0.5831	0.0528	1.2222	8.50201916999509e-12	SIG
GNA	2019-2020	NN	AX-108789460	2B	328987450	45.1772	-0.4209	-0.9315	0.0561	1.2982	6.67549678983854e-46	SIG
GNA	2019-2020	NN	AX-111078971	2B	746492740	10.6058	-0.1414	1.2577	0.052	1.2026	2.4805488107659e-11	SIG
GNA	2019-2020	NN	AX-109938129	2D	482789436	12.7858	-0.255	-0.1559	0.0369	0.8534	1.63934023045253e-13	SIG
GNA	2019-2020	NN	AX-111541522	3A	468988374	30.0745	0.5274	-0.1265	0.159	3.6789	8.44474239117884e-31	SIG
GNA	2019-2020	NN	AX-110438240	3A	655879714	14.8964	0.2755	-0.3863	0.0625	1.4462	1.27109340445789e-15	SIG
GNA	2019-2020	NN	AX-109334027	3D	2787188	10.5782	0.1299	-1.0411	0.0518	1.1982	2.64387194266283e-11	SIG
GNA	2019-2020	NN	AX-110433194	4A	42118392	8.3281	0.0578	2.114	0.0391	0.9058	4.70114591530603e-09	SIG
GNA	2019-2020	NN	AX-95250506	5A	244755093	11.7287	0.2678	-0.1441	0.0578	1.3382	1.86962709812566e-12	SIG
GNA	2019-2020	NN	AX-109283885	5B	7378405	12.5337	-0.0158	0.4364	0.0442	1.0228	2.92940838759625e-13	SIG
GNA	2019-2020	NN	AX-108961398	5D	479383946	44.4889	0.4197	0.7989	0.0508	1.1756	3.2561457968239e-45	SIG
GNA	2019-2020	NN	AX-110995846	6A	26964763	9.7607	-0.0253	-0.6634	0.0396	0.9162	1.73645070891986e-10	SIG
GNA	2019-2020	NN	AX-111529624	6A	63304033	7.3833	-0.0559	0.395	0.0288	0.667	4.13934126040895e-08	SIG
GNA	2019-2020	NN	AX-89343920	6B	577184494	8.8059	-0.1131	-0.8577	0.0301	0.6956	1.56470918643063e-09	SIG
GNA	2019-2020	NN	AX-111007163	6D	491005	8.5022	-0.2021	NA	0.0331	0.7667	3.91907313970603e-10	SIG
GNA	2019-2020	NN	AX-109537514	6D	472356808	20.9999	-0.3787	0.2221	0.0949	2.1949	1.00206652444032e-21	SIG
GNA	2019-2020	NN	AX-95078936	7A	712622998	10.9563	-0.0018	-1.2088	0.0518	1.199	1.10700993560921e-11	SIG
GNA	2019-2020	NN	AX-110908588	7B	571891270	7.2532	-0.0054	0.8035	0.0327	0.7574	5.5861444273466e-08	SIG
GNA	2019-2020	NN	AX-109404679	7D	1241444	11.1119	-0.2428	0.1606	0.0455	1.0535	7.73648589066711e-12	SIG
GNA	2019-2020	NN	AX-94413937	7D	28402627	15.8447	-0.286	NA	0.0392	0.9079	1.31986416231138e-17	SIG
GNA	2019-2020	NN	AX-111687062	7D	615554082	7.1952	0.0334	2.0073	0.0336	0.7766	6.38369855378253e-08	SIG
GNA	2019-2020	LN	AX-111484342	1A	438297116	8.5103	-0.0978	0.3714	0.0184	2.4351	3.09041603271451e-09	SIG
GNA	2019-2020	LN	AX-110462220	1B	10072694	12.829	-0.1716	-0.1638	0.0182	2.4085	1.48403339642352e-13	SIG
GNA	2019-2020	LN	AX-109884081	1B	629424551	7.7248	0.1509	0.0905	0.0114	1.5129	1.88556399156788e-08	SIG
GNA	2019-2020	LN	AX-109315961	2A	43925470	8.1833	-0.0275	-0.9111	0.0168	2.2247	6.56112961218758e-09	SIG
GNA	2019-2020	LN	AX-94870777	2A	760619808	45.7551	-0.2483	-0.4982	0.0227	3.0059	1.76448934708232e-46	SIG
GNA	2019-2020	LN	AX-109342465	2B	95798346	5.8599	0.0194	-0.5174	0.0124	1.6399	1.38145532886807e-06	SUG
GNA	2019-2020	LN	AX-86166607	2B	453267262	29.1142	0.3126	0.0509	0.0203	2.6811	7.70754835930262e-30	SIG
GNA	2019-2020	LN	AX-110412504	2D	2114236	20.1804	-0.2604	0.0989	0.0391	5.1788	6.612194200107e-21	SIG
GNA	2019-2020	LN	AX-111781026	3B	236779941	4.5865	-0.0638	-0.2616	0.0079	1.0487	2.5924927040814e-05	SUG
GNA	2019-2020	LN	AX-109541040	4B	657811156	13.5301	-0.0282	-0.4728	0.0253	3.3496	2.95368285075488e-14	SIG
GNA	2019-2020	LN	AX-110458863	4D	42805556	12.5097	-0.1679	0.1961	0.0206	2.7282	3.09598065351122e-13	SIG
GNA	2019-2020	LN	AX-109317474	5A	18058842	11.053	-0.0347	1.0703	0.0246	3.254	8.85975675008197e-12	SIG
GNA	2019-2020	LN	AX-109388866	5A	567915454	7.678	0.0124	-0.6036	0.0161	2.1298	2.10013883839624e-08	SIG
GNA	2019-2020	LN	AX-110590898	5B	596067411	15.9061	-0.2282	-0.0854	0.0166	2.2037	1.24303909943531e-16	SIG
GNA	2019-2020	LN	AX-95628932	6A	608074587	7.2019	-0.021	0.3762	0.0143	1.8933	6.28605071667141e-08	SIG
GNA	2019-2020	LN	AX-109893104	6B	113369552	8.5672	0.0323	0.3862	0.0151	1.9995	2.71100298046648e-09	SIG
GNA	2019-2020	LN	AX-111024912	6D	458366098	4.8031	-0.0506	0.4117	0.0096	1.2668	1.57413740117848e-05	SUG
GNA	2019-2020	LN	AX-110703267	7A	451574224	3.0657	0.0523	0.4712	0.0062	0.8161	0.000859887744369084	SUG
GNA	2019-2020	LN	AX-111449707	7A	626377274	11.5327	-0.0123	-0.5112	0.023	3.0434	2.93584244530809e-12	SIG
GNA	2019-2020	LN	AX-95177341	7D	566778880	17.7379	-0.2377	-0.1066	0.0353	4.6748	1.83114930897512e-18	SIG
GNAblup			AX-89423870	1A	354961453	24.8886	-0.1346	-0.1071	0.0137	1.9205	1.29508914990792e-25	SIG
GNAblup			AX-110914927	1A	590000943	20.4975	-0.1145	-0.33	0.0108	1.5253	3.18616953631027e-21	SIG
GNAblup			AX-108821558	1B	63804679	8.733	0.0751	0.059	0.0043	0.6002	1.85048301057156e-09	SIG
GNAblup			AX-110546369	1D	410800157	14.1495	-0.0968	0.0673	0.0058	0.8115	7.09539661931053e-15	SIG
GNAblup			AX-110380301	2A	542539731	7.9031	0.0617	-0.1231	0.0047	0.6622	1.25089925261312e-08	SIG
GNAblup			AX-110518481	2B	103990411	8.3519	0.0018	0.1927	0.0043	0.6006	4.45042331739574e-09	SIG
GNAblup			AX-110436289	3A	574329441	9.1347	0.0102	-0.3325	0.0055	0.7672	7.33870425881516e-10	SIG
GNAblup			AX-109418748	3B	339050773	12.3186	-0.0652	0.2727	0.0077	1.0813	4.80690277220308e-13	SIG
GNAblup			AX-108830560	3B	618962360	6.0455	-0.0607	0.0531	0.0032	0.4569	9.01019824489273e-07	SUG
GNAblup			AX-111018223	4A	597807341	16.7871	-0.0038	-0.7313	0.0107	1.4991	1.63495151062161e-17	SIG
GNAblup			AX-109844491	4B	546913261	5.5134	-0.0342	0.3186	0.0031	0.4401	3.06743238807379e-06	SUG
GNAblup			AX-108916749	4D	19090268	52.7397	-0.2245	-0.0745	0.0438	6.1523	1.82924850142707e-53	SIG
GNAblup			AX-110199817	5A	78904927	15.6539	0.0063	0.5544	0.0097	1.3682	2.22146399319987e-16	SIG
GNAblup			AX-111063282	5A	510218247	6.5909	0.0216	0.192	0.0034	0.4808	2.56660599703316e-07	SUG
GNAblup			AX-111472310	5A	573556088	13.2522	-0.0889	0.191	0.0059	0.8343	5.60091249493629e-14	SIG
GNAblup			AX-94991144	6A	13064769	9.8812	-0.0777	NA	0.0056	0.7826	1.524257328013e-11	SIG
GNAblup			AX-110924377	6B	223699947	13.2003	-0.07	0.2843	0.0082	1.1545	6.31298696681374e-14	SIG
GNAblup			AX-111911939	6D	531099	12.7531	-0.0963	0.0437	0.0054	0.7619	1.76742706681355e-13	SIG
GNAblup			AX-110606843	7A	442007291	6.396	-0.0243	0.1577	0.0034	0.4743	4.02008454084379e-07	SUG
GNAblup			AX-89424739	7B	46996299	5.6686	0.0512	-0.2967	0.0028	0.3998	2.14597750726507e-06	SUG
GNAblup			AX-110086082	7D	613875044	6.7235	-0.0223	-0.3267	0.0037	0.5188	1.89140055972932e-07	SUG
