# Supplementary material
Source: Research Square preprint supplement (doi:10.21203/rs.3.rs-9009137/v1)
Supplement: Supplementary file 12 [file ea79d2576927fa74eaacd857.xlsx]

## Sheet: Supplementary Data 5
Supplementary Data 5. Statistical analysis of NUE agronomic trait across 15 SNP markers in different genotyping groups.
Chromosome	SNP Marker	Candidate gene	Allele	Allele type	Number	Ratio	2017-2018 NUE agronomic trait						2018-2019 NUE agronomic trait						2019-2020 NUE agronomic trait
							NN Fields			LN Fields			NN Fields			LN Fields			NN Fields			LN Fields
							GY (kg·ha-1)	GNA (kg·ha-1)	NAA (kg·ha-1)	GY (kg·ha-1)	GNA (kg·ha-1)	NAA (kg·ha-1)	GY (kg·ha-1)	GNA (kg·ha-1)	NAA (kg·ha-1)	GY (kg·ha-1)	GNA (kg·ha-1)	NAA (kg·ha-1)	GY (kg·ha-1)	GNA (kg·ha-1)	NAA (kg·ha-1)	GY (kg·ha-1)	GNA (kg·ha-1)	NAA (kg·ha-1)
1A	AX-108957362	TaNPF5.5	TT	/	216	0.8852	5123.54a	145.28a	283.21a	34770.61a	85.46a	117.99a	4827.59a	123.84a	213.34a	4613.04a	84.41a	114.69b	5010.64a	132.08a	218.14a	4180.21a	69.72a	95.05a
			CC	/	0	/	/	/	/	/	/	/	/	/	/	/	/	/	/	/	/	/	/	/
			TC	/	27	0.1107	5012.14a	143.03a	291.15a	4776.76a	85.31a	117.99a	4917.84a	124.74a	224.44a	4799.85a	89.51a	125.04a	5142.28a	133.73a	230.13a	4394.15a	73.91a	100.60a
			NN	/	1	0.0041	3784.83	106.23	245.24	5169.79	97.02	129.51	4102.63	110.45	215.97	3060.87	48.46	89.65	4386.81	103.45	197.9	4134.93	64.92	100.45
1A	AX-94423107	TaNPF5.7	CC	/	232	0.9508	5177.51a	146.93a	284.26a	4780.51a	85.76a	117.99a	4910.79a	125.34a	214.24a	4644.08a	84.86a	115.14b	5071.06a	133.28a	219.19a	4212.74a	70.46a	95.80a
			TT	/	0	/	/	/	/	/	/	/	/	/	/	/	/	/	/	/	/	/	/	/
			TC	/	12	0.0492	3594.30b	102.55b	276.46a	4625.19a	82.61a	118.44a	3353.07b	94.45b	220.69a	4301.20a	84.56a	129.24a	4083.36b	110.49b	223.39a	3880.66a	65.37a	94.15a
			NN	/	0	/	/	/	/	/	/	/	/	/	/	/	/	/	/	/	/	/	/	/
1A	AX-111715806	TaNPF7.6-A1	TT	Inferior	127	0.5205	3681.11b	105.40b	257.87b	4318.74b	77.36a	110.94a	3565.97c	100.60c	201.35b	4266.57a	81.11a	112.74a	3935.53b	112.29c	206.30b	3689.36b	64.02b	88.76a
			GG	Superior	107	0.4385	6678.56a	189.21a	312.14a	5254.27a	94.45a	125.79a	6227.74b	149.33b	228.79b	5014.09a	88.76a	119.19a	6178.11a	152.02b	232.68ab	4750.07a	76.76ab	103.15a
			TG	heterozygous	2	0.0082	7199.25a	201.20a	302.25a	5022.79ab	94.75a	129.69a	7639.88a	186.36a	259.37a	4837.93a	85.16a	121.14a	6910.34a	189.96a	259.97a	4000.60b	68.37ab	93.85a
			NN	no type	8	0.0328	6173.46a	165.22a	309.60a	5421.29a	92.50a	122.94a	5462.97b	133.88b	221.89b	5078.86a	89.06a	117.84a	6210.49a	164.77ab	235.98ab	4821.44a	78.86a	103.45a
2A	AX-95225571	TaNPF5.34	TT	/	224	0.918	5155.32a	146.18a	284.56a	4782.31a	85.76a	118.29a	4886.81a	124.74a	214.39a	4652.17a	85.16a	115.44a	5058.32a	132.83a	218.59a	4197.30a	70.31a	95.65a
			CC	/	0	/	/	/	/	/	/	/	/	/	/	/	/	/	/	/	/	/	/	/
			TC	/	20	0.082	4522.94a	129.24a	275.11a	4666.27a	83.21a	114.69a	4257.42a	113.49a	216.34a	4346.48a	80.81a	118.74a	4621.74a	124.44a	227.59a	4187.11a	68.67a	96.10a
			NN	/	0	/	/	/	/	/	/	/	/	/	/	/	/	/	/	/	/	/	/	/
3A	AX-108770720	TaNPF2.4	CC	Inferior	175	0.7172	4351.57b	123.84b	270.16b	4498.35b	80.51b	113.64a	4172.56b	111.09b	207.35b	4413.64b	82.91a	114.39a	4461.47b	120.99c	211.39ab	3930.58b	67.02a	91.90a
			TT	Superior	41	0.168	7514.69a	210.64a	326.24a	5598.35a	99.10a	128.64a	7022.64a	165.37a	238.38a	5262.07a	89.81a	119.19a	6757.87a	167.77a	247.08a	5027.44a	80.81a	109.15a
			TC	heterozygous	26	0.1066	6356.52a	182.16a	308.25a	5268.67ab	96.85ab	129.69a	5864.77a	144.08a	225.49ab	5017.24ab	88.61a	119.79a	6038.83a	150.07ab	229.39ab	4623.69ab	74.06a	98.80a
			NN	no type	2	0.0082	3916.94b	110.04b	263.57b	5007.95ab	89.81ab	122.49a	3407.05b	101.20b	204.35b	4915.44ab	92.05a	118.89a	4481.71b	124.14bc	207.65b	4452.32ab	73.61a	94.00a
6A	AX-111660589	TaNPF8.19	AA	/	191	0.7828	4629.54b	131.33b	275.71b	4611.09c	82.01b	114.84b	4422.34b	115.89c	209.75b	4500.00b	83.21bc	114.54ab	4650.22b	123.99c	212.89b	4020.09b	67.77b	92.95a
			GG	/	7	0.0287	5834.33b	167.47b	295.50ab	4777.06bc	90.85ab	120.69ab	5461.62ab	144.38ab	235.23a	4459.22b	78.11c	108.55b	5984.86a	158.17ab	255.62a	4521.44ab	76.01ab	104.95a
			AG	/	38	0.1557	7203.30a	205.4a	319.94a	5484.86a	99.55a	130.88a	6647.98a	157.87a	235.38a	5194.15a	91.90ab	122.34a	6576.31a	164.92a	241.23a	4933.58a	79.01a	105.40a
			NN	/	8	0.0328	5735.98b	159.22b	294.45ab	5248.58ab	98.05a	131.03a	5432.98ab	130.28bc	207.80b	5140.63a	95.35a	123.24a	5573.01ab	142.88bc	235.23ab	4581.26ab	77.96a	103.75a
1B	AX-94847672	TaNPF6.5	AA	/	180	0.7377	4461.92c	126.99c	272.71b	4594.30b	82.46b	115.29a	4226.99c	112.44c	208.70c	4474.21c	83.06ab	114.69a	4530.73c	123.84b	214.24b	3983.36b	67.47b	92.50b
			CC	/	20	0.082	5854.27b	168.22b	295.20b	4844.53b	89.36ab	121.59a	5604.50b	138.68b	217.39bc	4762.97ab	84.86ab	112.44a	5653.82b	139.58b	219.04ab	4460.12b	75.26ab	99.70ab
			AC	/	39	0.1598	7587.26a	211.99a	328.19a	5555.77a	97.75a	128.34a	7158.92a	165.82a	235.38ab	5286.36a	93.40a	122.79a	6901.95a	165.67a	241.83a	5061.77a	80.06a	107.50a
			NN	/	5	0.0205	5979.01b	174.51b	289.51b	4795.50b	87.41ab	120.99a	5339.73b	141.53b	249.18a	4426.69c	79.76b	115.59a	5424.29b	138.23b	226.69ab	4008.55b	66.87b	97.45ab
1B	AX-110584241	TaNPF5.7	CC	Inferior	159	0.6516	4173.16b	118.44b	267.17a	4457.42a	79.61ab	112.89ab	3963.87b	107.80bc	206.45ab	4387.41ab	82.31ab	114.39a	4284.56b	118.14b	210.49a	3858.17b	66.27ab	91.30ab
			TT	Superior	81	0.332	6891.60a	195.65a	316.19a	5401.65a	97.45a	128.49a	6500.90a	155.17a	230.28ab	5107.05a	89.51ab	118.59a	6434.03a	158.92a	237.03a	4877.96a	78.26a	104.65a
			TC	heterozygous	2	0.0082	5217.09ab	149.18ab	269.87a	4490.40a	76.91ab	115.44ab	5413.34ab	141.08ab	234.63a	3744.53b	70.31b	107.05a	5138.53ab	140.33ab	222.19a	3586.36b	61.02ab	85.46ab
			NN	no type	2	0.0082	5497.00ab	152.47ab	288.31a	4356.22a	72.86b	97.75b	5152.92ab	95.65c	188.61b	4907.95ab	95.35a	123.69a	5713.34ab	129.84ab	193.85a	3754.57b	58.47b	79.76b
1B	AX-94449995	TaNPF7.7	CC	Inferior	137	0.5615	3859.07b	110.19b	260.27b	4365.67b	77.96b	111.39a	3751.72b	103.9c	203.45b	4302.10b	81.56a	113.34a	4094.45b	114.99c	207.80b	3739.73c	64.62c	89.66b
			TT	Superior	2	0.0082	7881.56a	221.59a	339.28a	5242.43a	93.70a	119.19a	6856.22a	174.51a	252.17a	5042.88a	89.66a	113.04a	7119.79a	182.01a	271.81a	5464.32a	99.85a	125.64a
			TC	heterozygous	105	0.4303	6668.82a	188.46a	313.04a	5290.70a	95.20a	126.54a	6189.51a	148.43b	228.04ab	5039.58a	88.76a	119.04a	6173.91a	153.07b	232.98b	4756.07b	76.61b	102.55b
			NN	no type	0	/	/	/	/	/	/	/	/	/	/	/	/	/	/	/	/	/	/	/
3B	AX-109029004	TaNPF1.1	CC	/	184	0.7541	5185.46a	147.23a	284.26a	4830.88a	87.11a	119.79a	4896.55a	124.74a	214.39a	4684.71a	85.91a	116.49a	5088.76a	133.13ab	219.04a	4242.28a	71.21a	96.25a
			TT	/	0	/	/	/	/	/	/	/	/	/	/	/	/	/	/	/	/	/	/	/
			TC	/	22	0.0902	4231.48b	123.24a	269.87a	4241.23b	74.06b	106.30b	4201.05a	113.49a	210.19a	4314.84a	78.56b	112.74a	4280.06b	119.34b	213.19a	3796.7b	64.17b	89.51a
			NN	/	38	0.1557	5203.30a	145.43a	289.51a	4798.35a	84.41a	116.19a	4898.95a	125.64a	217.69a	4528.79a	82.76ab	114.24a	5130.58a	134.18a	224.59a	4204.95a	68.82ab	96.40a
7B	AX-109038395	TaNPF2.12	GG	Inferior	185	0.7582	4516.64b	128.94b	273.31b	4569.57b	82.01ab	114.84ab	4311.69b	114.39b	209.45a	4470.46a	83.06ab	114.54ab	4570.16b	123.39b	212.59a	4000.00b	68.07a	93.10a
			AA	Superior	49	0.2008	7078.86a	198.20a	318.89a	5460.72a	97.90a	128.94a	6540.78a	155.92a	232.08a	5147.23a	89.81ab	119.19ab	6559.37a	163.87a	243.33a	4890.70a	78.11a	104.95a
			AG	heterozygous	3	0.0123	6392.95a	177.51a	293.55ab	4452.02b	80.06b	109.75b	6294.15a	159.37a	236.73a	4483.81a	78.71b	104.20b	6077.66a	142.58ab	246.33a	4003.45b	66.87a	99.85a
			NN	no type	7	0.0287	5958.32ab	170.46ab	305.55ab	5369.27a	93.10ab	126.24ab	5838.38a	130.13ab	214.39a	5119.94a	95.50a	128.49a	5553.67ab	129.84b	213.64a	4513.79ab	69.12a	96.40a
1D	AX-94679893	TaNPF6.5	CC	/	199	0.8156	4573.01b	130.28b	274.21b	4601.80b	82.91a	115.89a	4326.84b	114.24b	209.30b	4497.45b	83.36b	114.54b	4610.79b	124.59b	214.09a	4013.19b	68.07a	93.10a
			TT	/	0	/	/	/	/	/	/	/	/	/	/	/	/	/	/	/	/	/	/	/
			TC	/	42	0.1721	7561.47a	211.84a	327.44a	5482.46a	97.00a	127.14a	7091.60a	166.27a	236.88ab	5158.17ab	90.25b	119.64b	6878.71a	166.12a	242.58a	4985.76a	79.61a	107.20a
			NN	/	3	0.0123	5101.35b	145.43b	292.50b	5947.53a	97.30a	131.33a	6157.12a	157.27a	242.13a	5635.38a	105.10a	139.43a	5735.68ab	140.93ab	240.33a	5039.28a	74.36a	97.30a
1D	AX-94449995	TaNPF7.7	CC	Inferior	137	0.5615	3859.07b	110.19b	260.27b	4365.67b	77.96b	111.39a	3751.72a	103.90c	203.45b	4302.10b	81.56a	113.34a	4094.45b	114.99c	207.80b	3739.73c	64.62c	89.66b
			TT	Superior	2	0.0082	7881.56a	221.59a	339.28a	5242.43a	93.70a	119.19a	6856.22b	174.51a	252.17a	5042.88a	89.66a	113.04a	7119.79a	182.01a	271.81a	5464.32a	99.85a	125.64a
			TC	heterozygous	105	0.4303	6668.82a	188.46a	313.04a	5290.70a	95.20a	126.54a	6189.51b	148.43b	228.04ab	5039.58a	88.70a	119.04a	6173.91a	153.07b	232.98b	4756.07b	76.61b	102.55b
			NN	no type	0	/	/	/	/	/	/	/	/	/	/	/	/	/	/	/	/	/	/	/
7D	AX-111617345	TaNPF8.28	GG	Inferior	126	0.5164	3728.94c	107.05	258.47b	4328.49b	77.21b	110.64b	3656.82c	102.7c	203.30c	4273.61b	81.56b	112.59b	4027.44c	113.94c	206.15c	3716.19b	64.62b	89.21b
			AA	Superior	66	0.2705	6956.67a	194.30a	314.39a	5268.07a	94.60a	125.64a	6465.97a	155.77a	231.18a	5062.52a	88.46a	117.99ab	6417.09a	160.72a	237.18a	4725.04a	76.46a	103.75a
			AG	heterozygous	20	0.082	5932.53b	171.06b	306.15a	5284.71a	95.05a	127.14a	5431.48b	131.03b	224.14ab	5129.99a	91.90a	123.84a	5460.12b	134.33b	221.29b	4640.03a	74.81a	99.55a
			NN	no type	32	0.1311	6163.12b	175.11b	305.85a	5165.97a	93.85a	125.34a	5682.76b	135.83b	217.69bc	4794.30a	85.46ab	118.74ab	5748.43b	142.43b	232.83ab	4703.90a	75.86a	102.10a
7D	AX-110071841	TaNPF8.27	GG	Inferior	134	0.5492	3730.28b	107.05b	259.52b	4335.98b	77.36b	110.79b	3622.34b	101.65b	203.90a	4271.81b	81.56ab	113.64a	4024.29b	113.49b	207.35a	3714.54b	64.62b	89.51ab
			AA	Superior	106	0.4344	6782.61a	191.15a	313.79a	5322.34a	95.65a	126.84a	6319.49a	150.97a	227.74a	5094.15a	89.21a	118.74a	6240.03a	154.87a	234.33a	4809.30a	77.36a	103.75a
			AG	heterozygous	3	0.0123	5786.66a	165.37a	287.86ab	4880.06ab	93.55a	128.64a	5344.23a	135.53a	219.49a	3849.18b	70.61b	107.80a	5664.62a	146.48a	226.84a	3777.96b	61.47b	83.36b
			NN	no type	1	0.0041	6674.76	168.65	282.51	4197.9	73.46	101.95	6836.58	152.92	227.89	4641.68	80.96	112.44	6626.69	139.43	199.4	4449.78	77.96	98.95
