# Supplementary material
Source: Research Square preprint supplement (doi:10.21203/rs.3.rs-9009137/v1)
Supplement: Supplementary file 13 [file f01141c5fe4cb9b7a026ae10.xlsx]

## Sheet: Supplementary Data 7
Supplementary Data 7.The wheat transcription factors were collected by protein-DNA interactions predicted.
Gene ID		3D Modeling Score	Description	Interaction Score
Traes_1BL_7AA5EFD05.2	TraesCS1B02G326700.2	0.9568	Transcription factor tfiiib component	7489.7
Traes_4AL_276CC5E27.1	TraesCS4B02G053000.2	0.7151	SWIRM-associated region 1	7416.24
Traes_4DS_9CC3EA7C9.1	TraesCS4B02G053000.2	0.7123	SWIRM-associated region 1	7306.23
Traes_1DL_63D5C4C8E.2	TraesCS1D02G454400.2	0.732	chromatin organization	6808.79
Traes_1BL_469FA45C6.2	TraesCS1B02G351300.1	0.9746	Homeodomain	6678.6
Traes_6AL_8BA1FF8B2.1	TraesCS6A02G406700.1	0.7105	No apical meristem (NAM) protein	6517.08
Traes_1BL_3EEA722DF.1	TraesCS1A02G445700.4	0.7984	chromatin organization	6403.85
TRAES3BF021600230CFD_	TraesCS3B02G441600.1	0.8636		6361.88
Traes_1BL_A5A91DE10.1	TraesCS1B02G203300.2	0.7649	Myb/SANT-like DNA-binding domain	6358.35
TRAES3BF178300020CFD_	TraesCS3B02G262400.1	0.9741		6311.19
TRAES3BF024700170CFD_	TraesCS5B02G464400.1	1		6210.78
TRAES3BF024100010CFD_	TraesCS3B02G452300.1	0.7388		6137.65
Traes_6AL_AC1DA0AE6.2	TraesCS6A02G417600.1	0.9939	zinc finger	6117.13
Traes_6AS_4106E8E28.1	TraesCS6A02G118800.2	0.7021	GATA zinc finger	6059.93
Traes_5BL_9F73E599F.1	TraesCS5B02G125100.1	0.8507	E2F transcription factor CC-MB domain(E2F3)	5984.06
Traes_7BS_733347AC0.1	TraesCS7B02G145400.1	1	Ethylene insensitive 3	5970.93
Traes_5DL_26C867084.2	TraesCS5D02G133600.1	0.8439	E2F transcription factor CC-MB domain(E2F3)	5947.74
Traes_2BS_F1B450FA4.2	TraesCS2B02G184500.2	0.9932	Myb-like DNA-binding domain(MYB88)	5921.78
Traes_4BL_A2B32FCEE.1	TraesCS4B02G217400.1	0.8699	Helix-loop-helix DNA-binding domain	5804.37
Traes_4AS_DD16F89E7.1	TraesCS4A02G087000.1	0.8699	Helix-loop-helix DNA-binding domain	5777.72
Traes_5BL_C3F3A871A.1	TraesCS5B02G248100.4	0.9943	zinc finger	5773.36
Traes_7DL_C39412827.1	TraesCS7D02G404000.1	0.119	transcription, DNA-templated	5747.49
Traes_7AS_B2DC3787B.1	TraesCS7A02G218600.2	0.827	CCT motif(COL9)	5734.85
Traes_5AL_7FFD17EDE.2	TraesCS5A02G125900.3	0.8733	E2F transcription factor CC-MB domain(E2F3)	5734.33
Traes_2BL_8FED05903.1	TraesCS2B02G289900.1	1	helix loop helix domain	5729.51
Traes_2BL_34A0848F2.1	TraesCS2B02G466400.1	0.7829	Myb-like DNA-binding domain	5724.23
Traes_2BS_C270C0C9F.2	TraesCS2D02G199300.3	0.7086	zinc finger	5692.44
Traes_5AS_3D6AA43B5.1	TraesCS5A02G065000.1	0.995	B3 DNA binding domain	5686.79
Traes_4DL_68FD80D58.2	TraesCS4D02G242000.2	0.9648	-	5667.55
Traes_2AL_411B944D6.1	TraesCS2A02G271700.1	0.9748	helix loop helix domain	5665.59
Traes_1DS_300AB5CC9.2	TraesCS1D02G069700.2	0.799	SANT SWI3, ADA2, N-CoR and TFIIIB'' DNA-binding domains	5651.8
Traes_4DL_0075CCAD9.1	TraesCS4D02G328900.1	0.7395	Helix-loop-helix DNA-binding domain	5625.49
Traes_2DS_524E9B6A3.1	TraesCS2D02G031400.1	1	E2F transcription factor CC-MB domain	5615.85
Traes_4AS_3883DC244.1	TraesCS4A02G118400.1	0.793	Myb-related protein P(MYB12)	5604.8
Traes_6AS_9596E4B58.1	TraesCS6A02G195500.2	0.8048	E2F transcription factor CC-MB domain(E2F3)	5596.22
Traes_2DL_B32203C91.1	TraesCS2B02G529200.1	0.7696	DNA-binding domain in plant proteins such as APETALA2 and EREBPs	5575.55
Traes_4AL_76355F5F2.1	TraesCS4A02G415000.1	0.9983	zinc finger	5572.96
Traes_4BL_C5C94B24F.1	TraesCS4D02G341000.1	0.9286	regulation of nucleic acid-templated transcription	5535.8
Traes_5BL_C330C8714.3	TraesCS5B02G124000.1	0.7546	Myb/SANT-like DNA-binding domain	5520.84
Traes_2AS_20DD727DC.1	TraesCS2A02G031800.1	0.9613	E2F transcription factor CC-MB domain	5508.08
Traes_6BL_7E2D1D34C.3	TraesCS6B02G228500.2	0.9671	Myb-like DNA-binding domain	5500.81
Traes_6DL_434BF5425.1	TraesCS6D02G230900.1	0.7604	Zinc-finger of C2H2 type	5498.76
Traes_4AL_F023A8691.1	TraesCS4D02G136200.1	0.9267	Belongs to the GRAS family	5489.19
Traes_1AL_16EECD38D.2	TraesCS1A02G314400.2	0.966	Transcription factor tfiiib component	5467.87
Traes_4DS_D8AFBAC97.2	TraesCS4D02G007000.1	1	Histone-like transcription factor (CBF/NF-Y) and archaeal histone	5425.74
Traes_4DL_ACF3BE9C5.1	TraesCS4D02G328800.1	0.7343	Helix-loop-helix DNA-binding domain	5423.34
pGADT7-p53m		0.8182		5421.38
Traes_4DS_07F394006.2	TraesCS4D02G112100.4	1	bHLH-MYC and R2R3-MYB transcription factors N-terminal	5382.38
Traes_7DL_613F5240E.2	TraesCS7D02G349600.1	0.7233	Homeobox domain	5369.5
Traes_1AL_08BAD7CD3.1	TraesCS1A02G187900.1	0.9391	DNA-binding domain in plant proteins such as APETALA2 and EREBPs	5354.5
Traes_4DL_967152326.1	TraesCS4D02G187100.1	0.7988	Myb-related protein P(MYB12)	5353.84
TRAES3BF099900100CFD_	TraesCS3B02G135600.1	1		5349.9
Traes_2BL_6899C8ABD.1	TraesCS2B02G406400.1	0.7108	zinc finger binding to DNA consensus sequence [AT]GATA[AG]	5346.18
Traes_2AS_FA70DB417.1	TraesCS2A02G181200.1	1	C2H2-type zinc finger	5323.1
Traes_3AS_E01675F4E.1	TraesCS3A02G159600.1	0.8257	RWP-RK domain	5316.65
Traes_6AL_C13753B31.1	TraesCS6D02G249200.1	0.7282	Myb-like DNA-binding domain	5310.65
Traes_6AL_0C0899C15.1	TraesCS6A02G326500.2	0.7192	DNA binding domain(WRKY9)	5295.67
Traes_7AL_0FFE02C4C.1	TraesCS7A02G373500.1	0.7292	Homeobox domain	5261.9
Traes_5BL_E15759DAD.1	TraesCS5B02G556200.1	0.815	Heat stress transcription factor(HSF3)	5246.43
Traes_2AS_1161E1D2E.2	TraesCS2A02G158900.3	0.9194	Myb-like DNA-binding domain(MYB88)	5234.06
Traes_5DL_3FBCC4C48.1	TraesCS5D02G257700.2	1	zinc finger	5227.11
Traes_5BL_0C6735099.1	TraesCS5B02G151800.1	0.9219	Myb-like DNA-binding domain	5173.72
Traes_2BS_C94BD2E9F.1	TraesCS2B02G249200.1	0.7891	dof zinc finger protein	5165.44
Traes_6DL_10077D5F6.1	TraesCS6D02G326600.1	1	Ethylene insensitive 3	5165.34
Traes_4AL_C217A20A1.2	TraesCS4A02G465000.1	1	Belongs to the GRAS family	5163.03
Traes_6BL_790C095EE.2	TraesCS6B02G392000.1	0.7574	Transcriptional activator that binds specific DNA sequence	5156
Traes_3DS_E1D759A90.1	TraesCS3D02G166900.1	0.8371	RWP-RK domain	5155.69
Traes_5DL_21F7C6BF7.2	TraesCS5D02G266300.1	0.965	DNA binding domain(WRKY34)	5133.3
Traes_5BS_23717182B.1	TraesCS5B02G110600.1	0.9686	zinc finger	5129.26
Traes_7AL_669D4AE47.1	TraesCS7A02G299600.3	0.9714	No apical meristem (NAM) protein	5126.86
Traes_5DL_62DEF8361.1	TraesCS5D02G273600.1	0.7757	Ethylene insensitive 3	5120.51
Traes_3AL_B0460F201.1	TraesCS3A02G353200.3	0.8907	DRG Family Regulatory Proteins, Tma46	5118.15
Traes_1BS_03473DC22.2	TraesCS1B02G051600.2	1	protein desumoylation	5115.95
Traes_6AL_BA6465E822.	TraesCS6A02G199800.1	0.7065		5105.32
Traes_6AL_BA6465E821.	TraesCS6A02G199800.1	0.7065		5105.32
Traes_6AL_BA6465E82.1	TraesCS6A02G199800.1	0.7065	Zinc finger, C2H2 type	5105.32
Traes_7BS_99BF8BA2F.2	TraesCS7B02G115400.1	0.7248	NAC domain transcription factor superfamily protein	5104.33
Traes_7AL_25850F96F.1	TraesCS7A02G398400.1	0.9668	basic region leucin zipper	5100.4
Traes_2AL_088338613.1	TraesCS2A02G281200.1	0.9941	helix loop helix domain	5095.52
Traes_5BL_FB4EDEA83.2	TraesCS5B02G139800.1	0.984	basic region leucin zipper(AREB3)	5093.31
Traes_2AL_0EB34993E.1	TraesCS2A02G388300.1	0.7015	zinc finger binding to DNA consensus sequence [AT]GATA[AG]	5090.14
Traes_2DL_53D5FD18C.2	TraesCS2D02G336400.1	0.9308	No apical meristem (NAM) protein	5089.87
Traes_5BL_B94C45A8F.1	TraesCS5B02G117100.1	1	TCP family transcription factor	5087.25
Traes_6AL_36AB0312C.1	TraesCS6A02G290800.1	0.8018	Homeobox associated leucine zipper	5081.42
TRAES3BF017100030CFD_	TraesCS3B02G176200.1	0.7256		5058.53
Traes_7DL_3CE000E38.1	TraesCS7D02G392800.1	1	basic region leucin zipper	5057.15
Traes_6AL_30B272DDD.2	TraesCS6A02G198000.2	0.9886	Myb-like DNA-binding domain	5054.93
Traes_5BL_B55F708EC.1	TraesCS5B02G197500.1	0.965	helix loop helix domain	5053.31
Traes_6DL_D1C9CE275.1	TraesCS6D02G342200.1	0.7668	Transcriptional activator that binds specific DNA sequence	5050.84
Traes_5BL_B6051DD37.2	TraesCS5D02G273600.1	0.791	Ethylene insensitive 3	5048
Traes_2BL_6B925F45E.1	TraesCS2B02G578700.1	0.7127	RNA-binding, Nab2-type zinc finger	5042.9
Traes_2AL_3FB37A3E7.1	TraesCS2B02G529200.1	0.7461	DNA-binding domain in plant proteins such as APETALA2 and EREBPs	5040.62
Traes_2AL_CC403D182.1	TraesCS2A02G445500.1	0.7743	Myb-like DNA-binding domain	5027.72
Traes_4DL_B6034D454.2	TraesCS4D02G341000.1	0.9283	regulation of nucleic acid-templated transcription	5026.31
Traes_5BL_8D6C8E27F.1	TraesCS5B02G311700.1	0.8578	DNA-binding domain in plant proteins such as APETALA2 and EREBPs(CBF1)	5009.27
Traes_2DS_D05DC56BD.2	TraesCS2D02G169900.1	0.8081	calmodulin-binding transcription activator	5008.05
Traes_1DL_918A8F357.1	TraesCS1D02G379200.1	0.7222	Myb-like DNA-binding domain	4993.58
Traes_4BL_2136196AE.2	TraesCS4B02G242600.1	0.9198	-	4988.65
Traes_7BL_E2E7AA383.1	TraesCS7B02G253500.1	0.7705	Homeobox domain	4988.54
Traes_4BS_43C44F47B.1	TraesCS4B02G085200.1	0.9726	RWP-RK domain	4987.2
Traes_4DL_5B3B57371.1	TraesCS4D02G216200.1	0.9961	Belongs to the GRAS family	4984.76
TRAES3BF001100080CFD_	TraesCS3B02G475800.1	0.8457		4983.76
Traes_3DS_7C9147219.3	TraesCS3D02G183900.2	0.9834	No apical meristem (NAM) protein	4971.81
Traes_4AS_094442636.2	TraesCS4B02G299500.1	1	AP2 domain	4970.75
Traes_6AL_1688E9E0A.2	TraesCS6A02G268800.1	0.7009	Helix-loop-helix DNA-binding domain	4970.43
Traes_3AS_09025DA2E.1	TraesCS3A02G153700.1	1	Myb-like DNA-binding domain	4962.34
TRAES3BF083200080CFD_	TraesCS3B02G249700.1	0.9234		4956.62
TRAES3BF091200090CFD_	TraesCS3B02G116500.2	1		4954.36
Traes_2BS_E29F278C4.1	TraesCS2B02G168900.1	0.9941	B3 DNA binding domain	4944.38
Traes_6DS_59260A671.2	TraesCS6D02G179100.2	0.9823	Myb-like DNA-binding domain	4944.29
TRAES3BF122000050CFD_	TraesCS3B02G208300.2	0.9958		4942.34
Traes_5BL_D85C0EF26.1	TraesCS5B02G203100.1	0.7481	Myb-like DNA-binding domain	4935.57
Traes_6AL_C14335DC8.2	TraesCS6A02G208900.2	0.9776	No apical meristem (NAM) protein	4932.72
Traes_5BS_ED54C58C5.1	TraesCS5A02G080300.1	0.7621	Belongs to the GRAS family	4930.91
TRAES3BF276900020CFD_	TraesCS3B02G233700.2	0.7586		4925.76
Traes_5AL_69A969FF4.1	TraesCS5A02G146600.1	0.9634	DNA binding domain	4925.65
Traes_4BS_85666ADAF.1	TraesCS4B02G112700.1	0.7059	Myb/SANT-like DNA-binding domain	4924.83
Traes_1BL_9018AA7BA.2	TraesCS1B02G277300.1	0.9575	No apical meristem (NAM) protein	4924.78
Traes_2DL_0393046A4.1	TraesCS2D02G549000.1	0.7069	RNA-binding, Nab2-type zinc finger	4924.33
Traes_6DL_E7910DD23.2	TraesCS6D02G222500.1	0.9977	Myb/SANT-like DNA-binding domain	4919.88
Traes_5BL_81FD6E89B.9	TraesCS5B02G564200.1	0.8329	Myb/SANT-like DNA-binding domain	4917.96
Traes_6AL_B92597EA9.1	TraesCS6A02G378600.1	0.7635	No apical meristem (NAM) protein	4914.03
Traes_2AL_0F08552FB.1	TraesCS2A02G415200.1	0.7149	DNA-binding domain in plant proteins such as APETALA2 and EREBPs	4911.54
Traes_7DL_67FF12B6A.1	TraesCS7D02G529200.1	0.9586	helix loop helix domain	4905.98
Traes_5AL_27FB6BB0C.2	TraesCS5A02G180800.1	0.9645	DNA-binding domain in plant proteins such as APETALA2 and EREBPs	4901.06
Traes_1AS_4DA31F550.2	TraesCS1A02G102400.2	0.9271	bHLH-MYC and R2R3-MYB transcription factors N-terminal	4882.55
Traes_2BL_7BE6FCE7D.1	TraesCS2B02G340200.1	0.7341	Ethylene insensitive 3	4880.31
Traes_7DL_217C3CE9E.1	TraesCS7D02G450100.1	0.9149	YT521-B-like domain	4873.09
Traes_1DS_EFCC1617E.2	TraesCS1D02G078100.5	0.942	B3 DNA binding domain	4864.34
Traes_5DL_73CE92096.2	TraesCS5D02G150700.2	1	basic region leucin zipper(AREB3)	4858.01
Traes_5DL_56AA11E4E.2	TraesCS5D02G431900.1	0.9592	Zinc finger C-x8-C-x5-C-x3-H type (and similar)	4856.15
Traes_4DS_38EA63379.2	TraesCS4D02G083200.1	1	RWP-RK domain	4854.72
Traes_2BS_FDABA21A7.1	TraesCS2B02G212300.1	1	Belongs to the GRAS family	4852.02
Traes_4BS_2EE4988CD.1	TraesCS4A02G271000.1	0.9909	Belongs to the GRAS family(GAI)	4848.53
Traes_3DL_1FC3735D9.1	TraesCS3D02G442000.2	0.7984	Auxin response factors (ARFs) are transcriptional factors that bind specifically to the DNA sequence 5'-TGTCTC-3' found in the auxin-responsive promoter elements (AuxREs)(ARF2)	4846.96
TRAES3BF045500040CFD_	TraesCS3B02G595800.1	0.9976		4845.68
Traes_7BL_0C386426A.2	TraesCS7B02G187600.1	1	No apical meristem (NAM) protein	4840.66
Traes_2BL_A89BDB407.2	TraesCS2B02G300800.2	0.9359	CG-1	4835.95
Traes_7AL_B901881EA.1	TraesCS7A02G461800.1	0.9093	YT521-B-like domain	4829.89
Traes_5DL_A39210547.2	TraesCS5D02G422300.1	0.876	Belongs to the GRAS family(PAT1)	4827.3
Traes_2AL_9E68ABA72.1	TraesCS2A02G389200.1	0.7681	Myb/SANT-like DNA-binding domain	4826.17
Traes_4DS_AE4107C25.1	TraesCS4D02G110800.1	0.9536	Belongs to the GRAS family	4821.23
TRAES3BF136700080CFD_	TraesCS3B02G599700.1	0.9869		4820.83
Traes_5DL_7A35CD284.1	TraesCS5D02G258300.1	0.7721	helix loop helix domain	4818.42
Traes_7AS_A6C843545.2	TraesCS7A02G000300.1	0.9945	No apical meristem (NAM) protein	4815.72
Traes_5BL_938BFB459.2	TraesCS5B02G425300.2	0.9985	Zinc finger C-x8-C-x5-C-x3-H type (and similar)	4807.12
Traes_2BS_B8359978A.2	TraesCS2B02G118200.1	0.837	No apical meristem (NAM) protein	4805.58
Traes_4AS_02B607421.1	TraesCS4A02G062800.1	0.7373	heat shock factor	4801.48
Traes_4AS_6486B493A.1	TraesCS4A02G063100.1	0.8504	Transcriptional activator that binds specific DNA sequence	4797.05
Traes_6DL_2F3586557.2	TraesCS6D02G192400.4	0.9981	No apical meristem (NAM) protein	4792.71
Traes_6DS_273430303.2	TraesCS6D02G144400.2	0.7843	basic region leucin zipper	4792.3
Traes_6BS_444DFA94E.2	TraesCS6B02G141300.2	0.75	Auxin response factors (ARFs) are transcriptional factors that bind specifically to the DNA sequence 5'-TGTCTC-3' found in the auxin-responsive promoter elements (AuxREs)	4789.86
Traes_7AS_6E6A5CD04.1	TraesCS7A02G208200.1	0.7273	NAC domain transcription factor superfamily protein	4785.45
Traes_6DL_FF4C8C4AB.1	TraesCS6D02G272000.2	0.8135	Homeobox associated leucine zipper	4784.55
Traes_6DS_C59B6322F.1	TraesCS6D02G083800.1	0.715	heat shock factor	4780.57
Traes_5AL_B65EF5518.3	TraesCS5D02G273600.1	0.7927	Ethylene insensitive 3	4779.47
Traes_7AL_0D52C1D87.1	TraesCS7A02G292900.1	1	DNA-binding domain in plant proteins such as APETALA2 and EREBPs	4779.33
Traes_1BL_5C07BE2D0.1	TraesCS1B02G472000.1	0.7169	Myb/SANT-like DNA-binding domain	4776.39
TRAES3BF060400040CFD_	TraesCS3B02G018400.1	1		4770.94
Traes_4AL_F5C91EC4A.1	TraesCS4A02G230700.1	0.9403	RWP-RK domain	4769.7
Traes_5DS_D9B2B5A0D1.	TraesCS5D02G112900.1	0.8707		4767.56
Traes_2BL_361925B62.1	TraesCS2B02G351000.1	0.9139	Myb-like DNA-binding domain	4767.07
TRAES3BF201400030CFD_	TraesCS3A02G028200.3	0.9962		4758.63
Traes_7DL_AB67A0B36.1	TraesCS7D02G295100.1	0.9654	No apical meristem (NAM) protein	4756.29
Traes_2BL_FD8C2F815.1	TraesCS2B02G466500.1	0.7147	Myb-like DNA-binding domain	4742.98
Traes_6AS_66A98BA55.1	TraesCS6A02G071200.1	0.939	Transcription factor ABORTED	4741.29
Traes_1BL_E39CD252E.1	TraesCS1B02G233300.1	0.7385	AP2 domain	4739.6
Traes_5BL_C02570726.1	TraesCS5B02G143100.1	0.8885	Belongs to the GRAS family(SCR)	4731.22
TRAES3BF069400030CFD_	TraesCS3B02G457400.1	0.836		4731.01
Traes_1BL_09D8BE2C9.1	TraesCS1B02G195700.1	0.9492	DNA-binding domain in plant proteins such as APETALA2 and EREBPs	4729.86
Traes_5DL_96CF2E239.2	TraesCS5D02G185300.1	1	DNA-binding domain in plant proteins such as APETALA2 and EREBPs	4728.24
TRAES3BF048700110CFD_	TraesCS3B02G450400.1	1		4728.1
Traes_2BS_380EC4D1E.1	TraesCS2B02G209200.1	1	DNA binding domain(WRKY4)	4726.65
Traes_4AL_5062917C4.1	TraesCS4A02G359500.1	0.7734	Squamosa promoter-binding-like protein(SPL1)	4725.47
Traes_5BL_80B490E25.1	TraesCS5B02G510500.3	0.8281	B3 DNA binding domain	4716.4
Traes_5BL_CF90A7CAE.1	TraesCS5B02G229000.1	0.7375	transcription factor	4712.77
Traes_2DS_9430AAD52.1	TraesCS2D02G165900.4	0.8937	Myb-like DNA-binding domain(MYB88)	4708.52
Traes_4BL_38E55D7B4.1	TraesCS4B02G296200.1	0.8382	zinc finger	4698.6
Traes_4AS_92067319F.1	TraesCS4A02G065000.2	0.9738	-	4698.47
TRAES3BF049800070CFD_	TraesCS3B02G180300.1	0.999		4688.22
Traes_4AL_B44DF4ACC.1	TraesCS4A02G242700.1	0.7755	No apical meristem (NAM) protein	4681.29
Traes_6BS_2125E90F3.2	TraesCS6B02G012800.1	0.969	Myb-like DNA-binding domain	4681.24
Traes_3AL_B71F3F028.2	TraesCS3A02G414100.4	1	SANT SWI3, ADA2, N-CoR and TFIIIB'' DNA-binding domains	4677.22
Traes_3AS_1FD49785C.3	TraesCS3A02G057900.1	0.7208	Helix-loop-helix DNA-binding domain	4675.59
Traes_3DL_C77596863.1	TraesCS3D02G209700.1	0.9568	zinc finger	4666.98
Traes_2DL_FBE64209C.1	TraesCS2D02G491200.2	0.8172	Auxin response factors (ARFs) are transcriptional factors that bind specifically to the DNA sequence 5'-TGTCTC-3' found in the auxin-responsive promoter elements (AuxREs)(MP)	4664.13
Traes_5BL_6617B7367.2	TraesCS5B02G550800.1	1	Aspartokinase	4657.9
Traes_3DS_901181FDD.1	TraesCS3D02G161100.1	0.9988	Myb-like DNA-binding domain	4654.61
Traes_5AL_4F083B77E.1	TraesCS5A02G330200.1	0.996	START domain	4649.94
Traes_7BS_F44A273F8.2	TraesCS7B02G138900.2	0.8398	Auxin response factors (ARFs) are transcriptional factors that bind specifically to the DNA sequence 5'-TGTCTC-3' found in the auxin-responsive promoter elements (AuxREs)	4647.57
Traes_6AS_967D58FB4.1	TraesCS6A02G113000.1	0.7513	Auxin response factors (ARFs) are transcriptional factors that bind specifically to the DNA sequence 5'-TGTCTC-3' found in the auxin-responsive promoter elements (AuxREs)	4646.8
Traes_7DS_985883968.2	TraesCS7D02G000200.1	1	No apical meristem (NAM) protein	4646.18
Traes_3AL_0F75B411F.2	TraesCS3A02G450700.1	0.4417	Histone-like transcription factor (CBF/NF-Y) and archaeal histone	4644.71
Traes_4BS_ACD70539F.1	TraesCS4B02G065300.1	0.7807	Divergent CCT motif	4641.14
TRAES3BF156500010CFD_	TraesCS3B02G156900.1	0.741		4640.96
Traes_6AS_26AC51E52.1	TraesCS6D02G051600.2	0.7609	helix loop helix domain	4639.66
Traes_2BL_264CE0C2E.1	TraesCS2B02G589700.1	1	SANT SWI3, ADA2, N-CoR and TFIIIB'' DNA-binding domains	4638.1
Traes_3AS_DE5832BF8.1	TraesCS3A02G176500.1	0.9771	No apical meristem (NAM) protein	4637.65
Traes_2AL_F001B4F26.1	TraesCS2A02G566000.1	0.8508	NAC domain-containing protein 7	4633.44
Traes_5DL_84C86F76D.1	TraesCS5D02G204800.1	1	helix loop helix domain	4631.9
Traes_2BS_ACA52BC08.1	TraesCS2B02G207800.1	0.9806	C2H2-type zinc finger	4630.83
Traes_2BL_0C45635DD1.	TraesCS2B02G332100.1	0.8005		4628.56
Traes_1AS_21ACC7F67.1	TraesCS1A02G018900.1	0.988	Zinc finger, C2H2 type	4624.73
Traes_4AL_22CE41C6F.1	TraesCS4A02G499900.1	1	No apical meristem (NAM) protein	4621.85
Traes_2BS_ECF9B4EB4.1	TraesCS2B02G105100.1	0.9975	heat shock factor	4620.08
Traes_2AS_D0B21BF981.	TraesCS2A02G192600.1	0.9198		4619.7
TRAES3BF011000010CFD_	TraesCS3D02G426700.5	0.7033		4616.74
Traes_4DL_9023F3504.1	TraesCS4D02G181100.1	0.8275	Myb-like DNA-binding domain	4613.53
Traes_5BL_93F0F3F5D.1	TraesCS5B02G243800.1	0.9873	ZF-HD protein dimerisation region	4613.45
Traes_3DL_663081CEA.1	TraesCS3D02G426700.5	0.701	CG-1	4611.25
Traes_1AS_61D017632.2	TraesCS1A02G129300.1	0.9825	Myb-like DNA-binding domain	4609.37
TRAES3BF012600090CFD_	TraesCS3B02G307000.1	0.9988		4605.22
Traes_5AS_5B9D5E067.1	TraesCS5A02G067600.1	0.9931	Helix-loop-helix DNA-binding domain	4602.98
Traes_5BL_0C3609EF0.2	TraesCS5B02G312500.1	0.8238	DNA-binding domain in plant proteins such as APETALA2 and EREBPs	4598.25
Traes_4AL_B6992AAA6.1	TraesCS4A02G249400.1	0.7926	Divergent CCT motif	4597.27
Traes_4AL_24A54C8BA.2	TraesCS4A02G416800.1	1	zinc finger	4596.66
Traes_1AL_FFCC35B9C.1	TraesCS1D02G338300.2	0.7851	transcription factor	4593.22
Traes_6DL_6FAD063EE.2	TraesCS6D02G267100.1	0.7359	Zinc finger protein(COL9)	4592.26
Traes_4AS_F7A905B43.1	TraesCS4A02G008900.1	0.8423	zinc finger	4591.13
Traes_4DS_ADBA6E30A.1	TraesCS4D02G040400.1	0.9972	Belongs to the GRAS family(GAI)	4589.63
Traes_3DL_A631E1F0C.1	TraesCS3D02G408600.1	1	SANT SWI3, ADA2, N-CoR and TFIIIB'' DNA-binding domains	4585.7
Traes_3DL_A6713EED4.1	TraesCS3D02G443500.1	0.9883	Histone-like transcription factor (CBF/NF-Y) and archaeal histone	4585.18
Traes_4AL_784CF40E5.1	TraesCS4A02G310700.1	0.9983	zinc finger	4583.54
Traes_2AL_C76F4E089.2	TraesCS2A02G342500.1	0.7056	Ethylene insensitive 3	4582.74
TRAES3BF027700030CFD_	TraesCS3B02G367400.1	1		4581.03
Traes_6DS_45417CBA9.2	TraesCS6A02G155400.1	0.9945	MYB-CC type transfactor, LHEQLE motif	4575.08
Traes_5AL_C1676060F.2	TraesCS5A02G423300.2	0.9458	Zinc finger C-x8-C-x5-C-x3-H type (and similar)	4573.04
Traes_4AL_FB3CE240C.1	TraesCS4A02G430600.1	0.7701	Belongs to the GRAS family	4567.48
TRAES3BF002300100CFD_	TraesCS3B02G438900.1	0.7424		4563.67
Traes_7DS_9FBF54244.1	TraesCS7D02G283800.1	0.79	No apical meristem (NAM) protein	4563.3
Traes_6BS_73A93153A.1	TraesCS6B02G195400.1	0.7825	SWI SNF complex subunit	4561.81
Traes_5DL_743B870D9.1	TraesCS5D02G447500.1	0.7746	DNA-binding transcription factor activity	4556.52
Traes_6AL_393A90DDD.3	TraesCS6A02G201100.1	0.8448	zinc finger	4556.15
Traes_5AL_69590B897.1	TraesCS5A02G143300.1	0.8052	bZIP Maf transcription factor	4552.81
Traes_5DL_3CDCC5DFF.2	TraesCS5D02G513300.1	0.7703	Squamosa promoter-binding-like protein(SPL1)	4552.81
Traes_5AS_25253EF6C.1	TraesCS5A02G005500.1	0.9819	DIRP	4548.76
TRAES3BF099600030CFD_	TraesCS3B02G404800.3	1		4548.08
Traes_2AL_773EA7A5A.2	TraesCS2A02G283800.2	0.9846	CG-1	4547.04
Traes_7DS_3570A0055.2	TraesCS7D02G158500.1	0.7094	DNA-binding domain in plant proteins such as APETALA2 and EREBPs	4542.11
Traes_2AL_409AB7647.1	TraesCS2A02G330500.1	0.7053	DNA binding domain(WRKY34)	4541.84
Traes_1BL_8E4911A3C.1	TraesCS1B02G158400.1	0.5526	AP2 domain	4537.64
TRAES3BF099700020CFD_	TraesCS3B02G404000.1	0.7667		4535.4
Traes_5AL_14D9A9844.2	TraesCS5A02G215900.1	0.7712	DNA-binding domain in plant proteins such as APETALA2 and EREBPs	4533.29
Traes_4BS_6AFF9C78A.2	TraesCS4B02G114800.6	1	bHLH-MYC and R2R3-MYB transcription factors N-terminal	4532.75
Traes_5DS_CB3830B22.2	TraesCS5D02G116700.1	0.7804	Zinc-finger double-stranded RNA-binding	4527.65
TRAES3BF064700080CFD_	TraesCS3A02G099200.1	0.8024		4517.32
Traes_3AS_0D78930B4.1	TraesCS3A02G006300.1	0.7235	Helix-loop-helix DNA-binding domain	4513.54
Traes_4DS_2CE9E3235.1	TraesCS4D02G122000.1	0.7218	Belongs to the GRAS family(SCR)	4512.77
Traes_2BL_2784BC27C.2	TraesCS2B02G370400.1	0.7573	RWP-RK domain	4512.47
Traes_3AL_463ABD4BF.1	TraesCS3A02G289200.1	0.7538	HSF-type DNA-binding	4508.25
TRAES3BF079200050CFD_	TraesCS3B02G087800.1	0.7326		4507.9
Traes_4AS_866E12EE7.1	TraesCS4A02G082400.1	0.884	Zinc finger, C3HC4 type (RING finger)	4506.79
TRAES3BF099600200CFD_	TraesCS3B02G404500.1	0.954		4506.2
Traes_7DS_7F0AF83B0.1	TraesCS7D02G008500.1	0.8049	No apical meristem (NAM) protein	4501.04
Traes_2BL_9A4B3C539.1	TraesCS2B02G367300.2	0.7339	B-Box-type zinc finger	4500.75
TRAES3BF114600150CFD_	TraesCS3B02G428000.1	0.9886		4497.74
Traes_4DL_61AE80723.1	TraesCS4B02G257200.1	0.7634	helix-loop-helix DNA-binding domain containing protein	4496.21
Traes_2DL_D39684C41.1	TraesCS2D02G444300.1	0.7315	Myb-like DNA-binding domain	4495.66
Traes_5DL_1733FB4DA.1	TraesCS5D02G349800.2	1	NB-ARC domain	4487.53
Traes_2DL_BD8048C15.1	TraesCS2D02G295300.2	0.9345	E2F transcription factor CC-MB domain(E2F3)	4486.29
Traes_2AL_4D0085951.2	TraesCS2A02G547900.1	0.7053	RNA-binding, Nab2-type zinc finger	4485.52
Traes_1AL_3493FCCBE.1	TraesCS1A02G437400.1	0.7262	Myb/SANT-like DNA-binding domain	4483.02
Traes_5BS_31CD3BB2E.1	TraesCS5B02G004400.1	0.9777	DIRP	4482.99
Traes_4AL_E769BB5A6.1	TraesCS4B02G141300.1	0.9669	Belongs to the GRAS family	4482.33
Traes_7DS_AB399594E.2	TraesCS7D02G248000.1	0.8509	SBP domain(SPL14)	4479.43
Traes_7AL_665B92F4E.1	TraesCS7A02G553800.1	0.9486	Myb-like DNA-binding domain	4477.42
Traes_5BS_938D6B791.1	TraesCS5B02G117700.1	1	GATA zinc finger	4475.35
Traes_5BL_852C30796.1	TraesCS5B02G117700.1	1	GATA zinc finger	4475.35
TRAES3BF029100010CFD_	TraesCS3B02G323800.1	0.7633		4475.07
Traes_1DL_83218C6CE.1	TraesCS1D02G445200.1	0.7292	Myb/SANT-like DNA-binding domain	4472.75
Traes_7BS_33B5A5D5C.1	TraesCS7B02G118800.1	0.9821	helix loop helix domain	4471.96
Traes_5BL_9B80DEC84.1	TraesCS5B02G290500.2	1	SANT SWI3, ADA2, N-CoR and TFIIIB'' DNA-binding domains	4471.85
Traes_6DS_F95C12EBB.1	TraesCS6D02G127600.2	0.8372	Auxin response factors (ARFs) are transcriptional factors that bind specifically to the DNA sequence 5'-TGTCTC-3' found in the auxin-responsive promoter elements (AuxREs)(ARF6)	4471.29
Traes_2BL_E322FD546.3	TraesCS2B02G519200.2	0.814	Auxin response factors (ARFs) are transcriptional factors that bind specifically to the DNA sequence 5'-TGTCTC-3' found in the auxin-responsive promoter elements (AuxREs)(MP)	4465.02
Traes_5AL_04D3E97F0.1	TraesCS5A02G440400.1	0.7759	DNA-binding transcription factor activity	4460.7
Traes_5BL_462E6AA25.2	TraesCS5B02G350900.1	1	transcription, DNA-templated	4459.55
Traes_2DL_EEF2E71FA.1	TraesCS2D02G386100.1	0.7834	zinc finger binding to DNA consensus sequence [AT]GATA[AG]	4458.98
Traes_6DL_AB95B0CE0.1	TraesCS6D02G306300.1	0.7235	DNA binding domain(WRKY9)	4457.23
Traes_5BL_028D02DF6.1	TraesCS5B02G197700.1	0.9599	Homeobox associated leucine zipper(hb-1)	4456.32
TRAES3BF063000030CFD_	TraesCS3B02G217100.1	0.9744		4454.34
TRAES3BF062700040CFD_	TraesCSU02G179500.1	0.9969		4451.43
TRAES3BF021600290CFD_	TraesCS3B02G599900.1	0.8509		4451.22
Traes_1BL_A8FC9D468.1	TraesCS1B02G312900.1	0.9717	B3 DNA binding domain	4449.89
Traes_1AL_A4B5C1474.2	TraesCS1A02G375600.2	0.8148	Heat stress transcription factor	4448.88
Traes_2BL_B69300543.1	TraesCS2B02G407600.1	0.8097	Homeobox associated leucine zipper	4447.85
Traes_2BL_1E7B7A8CA.1	TraesCS2B02G313600.2	0.9344	E2F transcription factor CC-MB domain(E2F3)	4443.54
TRAES3BF062600010CFD_	TraesCSU02G179500.1	1		4442.47
Traes_5BL_30D8E6BE2.1	TraesCS5B02G320800.1	0.7868	Myb-like DNA-binding domain	4441.16
Traes_5BS_AF63E8E5C.2	TraesCS5B02G114500.1	0.7855	Zinc-finger double-stranded RNA-binding	4439.76
Traes_7AS_0F019FB93.2	TraesCS7A02G249100.2	0.8487	SBP domain(SPL14)	4437.99
TRAES3BF090100150CFD_	TraesCS3B02G392600.1	0.7722		4433.41
TRAES3BF108400020CFD_	TraesCS3B02G392600.1	0.7722		4433.41
Traes_2AL_39F789674.2	TraesCS2D02G347300.1	0.7328	B-Box-type zinc finger	4432.64
Traes_3DL_DD2F7201D.2	TraesCS3D02G272700.1	0.9727	Homeobox KN domain	4432.15
Traes_4DL_184FFC74B.2	TraesCS4D02G314000.1	0.9478	zinc finger	4429.75
Traes_6BL_340C2A897.1	TraesCS6B02G334700.1	0.9787	DNA-binding domain in plant proteins such as APETALA2 and EREBPs	4427.69
Traes_7AS_6398221B7.2	TraesCS7A02G008800.1	0.8085	No apical meristem (NAM) protein	4424.61
Traes_5DL_4F9BD63F0.1	TraesCS5D02G132100.1	0.7271	Myb/SANT-like DNA-binding domain	4423.88
Traes_2AL_05ECC440C.2	TraesCS2A02G491000.1	0.8112	Auxin response factors (ARFs) are transcriptional factors that bind specifically to the DNA sequence 5'-TGTCTC-3' found in the auxin-responsive promoter elements (AuxREs)(MP)	4421.9
Traes_5BL_6888AE9CB.1	TraesCS5B02G262400.1	0.7821	Protein TRANSPARENT TESTA	4419.55
Traes_6AL_E94233A40.1	TraesCS6A02G392300.1	0.9642	SANT SWI3, ADA2, N-CoR and TFIIIB'' DNA-binding domains	4417.62
Traes_5BL_92902F993.1	TraesCS5B02G521100.1	0.7927	ankyrin repeats	4415.41
Traes_4AS_8A64DBE8E.1	TraesCS4A02G005500.1	0.9966	ethylene-responsive transcription factor	4414.44
Traes_1BL_687A47E82.2	TraesCS1B02G228000.2	0.9774	DNA-binding transcription factor activity	4413.87
Traes_6DL_5D47DC487.1	TraesCS6D02G378100.1	0.9653	SANT SWI3, ADA2, N-CoR and TFIIIB'' DNA-binding domains	4411.3
Traes_1BS_C5E6FB087.1	TraesCS1B02G091600.1	0.9412	Homeobox protein knotted-1-like	4411.06
Traes_5BL_F367A99A7.1	TraesCS5B02G444100.2	0.7746	DNA-binding transcription factor activity	4410.19
Traes_2DL_59DE7446E.1	TraesCS2D02G387100.1	0.8119	Myb/SANT-like DNA-binding domain	4409.8
Traes_2BS_647C82888.4	TraesCS2B02G116900.1	0.734	Ethylene insensitive 3	4408.92
Traes_7BL_BA181D2AD.2	TraesCS7B02G478200.2	0.8684	Myb-like DNA-binding domain	4408.55
Traes_5BL_A7C4DAE11.2	TraesCS5B02G326400.2	0.9796	NB-ARC domain	4404.08
Traes_4AL_F853C8660.1	TraesCS4A02G486200.1	0.8049	No apical meristem (NAM) protein	4402.91
Traes_6AS_4B9F0CBBF.2	TraesCS6A02G007300.1	0.9667	Myb-like DNA-binding domain	4401.59
Traes_2AL_8EC530273.1	TraesCS2A02G297400.1	0.9279	E2F transcription factor CC-MB domain(E2F3)	4401.3
Traes_1BL_AF69F4610.1	TraesCS1B02G226200.1	0.7941	Transcription factor	4397.15
Traes_2DL_EE2EDAB78.1	TraesCS2D02G350400.1	0.7573	RWP-RK domain	4397.12
Traes_4DL_E50C77AEC.3	TraesCS4D02G266400.1	0.7358	Belongs to the GRAS family(PAT1)	4391.1
Traes_2BL_46E59998A1.	TraesCS2B02G413500.1	0.741		4389.93
Traes_5DS_476AB27D8.2	TraesCS5D02G007000.4	1	DIRP	4387.76
Traes_5DS_C06FE6037.2	TraesCS5A02G080300.1	0.7621	Belongs to the GRAS family	4385.99
Traes_4BL_7EC2BFC7B.1	TraesCS4B02G299700.1	0.93	DNA-binding domain in plant proteins such as APETALA2 and EREBPs	4385.13
Traes_1DL_AEBCCB52B.1	TraesCS1D02G338300.2	0.7788	transcription factor	4384.71
TRAES3BF021600300CFD_	TraesCS3B02G600000.1	1		4382.12
Traes_7AS_1318B59D3.2	TraesCS7A02G146700.1	0.7421	Transcriptional activator that binds specific DNA sequence	4382.01
Traes_6AS_F1CEB89EE.2	TraesCS6A02G154600.1	0.7829	basic region leucin zipper	4380.32
Traes_2AL_5ACD4B2ED.2	TraesCS2A02G326500.1	1	No apical meristem (NAM) protein	4373.62
Traes_6DL_3B9E63F04.2	TraesCS6D02G188100.1	0.7658	zinc finger	4371.39
Traes_5BL_C1D4586B1.2	TraesCS5B02G216900.1	0.71	Myb-like DNA-binding domain	4369.13
Traes_4AL_D883FDB1D.1	TraesCS4A02G242300.1	0.9632	transcription, DNA-templated	4367.51
Traes_5AL_EDF2DD187.1	TraesCS5A02G533900.1	0.7234	Transcription factor	4367.35
Traes_1BL_43408C9B0.2	TraesCS1B02G173900.1	0.9301	START domain(REV)	4362.87
Traes_2BS_4818EA1FF.1	TraesCS2D02G181400.2	0.8483	K-box region	4362.1
Traes_4BS_A79538646.4	TraesCS4B02G141500.1	1	Belongs to the GRAS family	4361.28
Traes_6DL_FA861D610.2	TraesCS6D02G320700.1	0.9957	DNA-binding domain in plant proteins such as APETALA2 and EREBPs	4361.24
TRAES3BF086800020CFD_	TraesCS3B02G360900.1	0.7044		4352.44
Traes_4AL_04B7D5758.1	TraesCS4A02G176600.1	0.9738	Belongs to the GRAS family	4352.35
Traes_6DL_604AFCFEF.1	TraesCS6D02G221600.1	0.7089	Transcriptional activator that specifically binds 5'- GATA-3' or 5'-GAT-3' motifs within gene promoters	4352.29
Traes_4BL_BE10705D5.2	TraesCS4B02G261600.1	1	Homeobox domain	4350.99
Traes_1AL_8BC434C02.2	TraesCS1A02G214200.3	0.9746	DNA-binding transcription factor activity	4350.32
Traes_1BL_67DE12110.1	TraesCS1B02G349200.1	0.7847	transcription factor	4349.62
TRAES3BF029000080CFD_	TraesCS3B02G324400.1	0.7709		4346.15
Traes_5DL_F8AEA5040.1	TraesCS5D02G179700.1	0.9716	Protein TRANSPARENT TESTA	4341.26
Traes_6DL_9FC9C02351.	TraesCS6D02G230800.1	0.7961		4338.7
Traes_7DL_3B340D60A.1	TraesCS7D02G463100.1	0.7628	Nuclear transcription factor Y subunit	4338.21
Traes_3DL_A3AC10E58.1	TraesCS3D02G354100.1	0.8557	Belongs to the GRAS family	4338.08
Traes_3AS_62742A0471.	TraesCS3A02G099200.1	0.8409		4335.56
TRAES3BF051200070CFD_	TraesCS3B02G266800.1	0.8231		4335.53
Traes_3AL_1ADA4B536.1	TraesCS3A02G205900.1	0.9945	zinc finger	4330.61
Traes_5AS_E1F692526.1	TraesCS5A02G113500.2	0.7341	SWIRM domain	4329.28
Traes_2DL_DE3909A32.1	TraesCS2D02G270300.1	0.7831	helix loop helix domain	4329.27
Traes_2BL_D718E27A9.1	TraesCS2B02G399700.2	0.7509	No apical meristem (NAM) protein	4327.75
Traes_5BL_71717F042.1	TraesCS5B02G248600.1	0.777	helix loop helix domain	4327.24
Traes_6AS_DA75BB1FD.1	TraesCS6A02G146900.1	0.7431	DNA binding domain	4325.16
Traes_2BL_3A840DB921.	TraesCS2B02G289800.1	0.9767		4322.97
Traes_7DL_3640B95AB.3	TraesCS7D02G489600.1	0.8406	cheY-homologous receiver domain	4322.03
Traes_6BL_82D755454.1	TraesCS6B02G440000.1	1	B3 DNA binding domain	4321.89
Traes_5DL_026913547.1	TraesCS5D02G386500.2	0.7624	transcription factor	4320.27
Traes_2AL_BFB0C6D4C.1	TraesCS2A02G389400.1	0.838	Homeobox associated leucine zipper	4318.78
Traes_5BL_5DE02D63E.1	TraesCS5B02G246700.1	0.8164	Homeobox associated leucine zipper	4318.62
Traes_6DS_8436285E5.1	TraesCS6D02G147300.1	0.8814	Histone-like transcription factor (CBF/NF-Y) and archaeal histone	4313.63
Traes_2BS_169BEF991.2	TraesCS2B02G167900.1	0.766	basic region leucin zipper	4312.75
TRAES3BF060500180CFD_	TraesCS3B02G010400.1	0.7386		4311.92
TRAES3BF042100080CFD_	TraesCS3B02G237800.1	0.969		4309.01
Traes_6AS_690C97429.1	TraesCS6B02G185700.1	0.8775	Histone-like transcription factor (CBF/NF-Y) and archaeal histone	4304.08
Traes_1DL_AFDF3B024.1	TraesCS1D02G276100.1	1	Seed dormancy control	4303.48
Traes_3AS_1C4870CDE.1	TraesCS3A02G116500.1	0.9236	Myb/SANT-like DNA-binding domain	4302.86
Traes_3DL_D9A29948B.2	TraesCS3D02G329400.1	0.8509	Transcriptional activator of alpha-amylase expression(GAMYB)	4300.8
Traes_6AS_7B3C53009.2	TraesCS6A02G085800.2	0.869	Glycosyl hydrolase family 14	4297.32
Traes_5DL_6EB179C88.1	TraesCS5D02G445100.1	0.7412	heat shock factor	4294.5
Traes_4AS_3B4E00416.2	TraesCS4A02G072600.1	0.7542	SANT SWI3, ADA2, N-CoR and TFIIIB'' DNA-binding domains(TKI1)	4293.61
Traes_1AL_914726769.1	TraesCS1A02G212700.1	0.7401	Transcription factor	4286.72
Traes_2AL_8E714CD46.1	TraesCS2A02G275600.1	1	helix loop helix domain	4284.32
Traes_5AL_83E515188.2	TraesCS5A02G409800.1	0.834	Belongs to the GRAS family(PAT1)	4283.07
Traes_4AL_DC57F1ACA.1	TraesCS4A02G242300.1	1	transcription, DNA-templated	4281.35
Traes_7DL_1717A9083.1	TraesCS7D02G327900.1	0.9505	helix loop helix domain(SPCH)	4276.43
Traes_2AL_450404EA6.1	TraesCS2A02G271300.1	1	Lateral organ boundaries (LOB) domain	4273.32
Traes_4DS_AFCEDDE67.2	TraesCS4A02G285900.2	0.7914	Divergent CCT motif	4272.3
Traes_4AS_52EB860E7.2	TraesCS4A02G027700.1	0.7194	heat shock factor	4272.27
Traes_5DL_82E82F8F9.1	TraesCS5D02G209600.1	0.7004	Myb-like DNA-binding domain	4271.59
Traes_4DL_EE941086E.1	TraesCS4D02G239600.1	0.7249	heat shock factor	4268.33
Traes_1BL_BDF0801D01.	TraesCS1A02G221900.1	0.9478		4268.09
Traes_1AS_1B1587F7D.1	TraesCS1D02G075700.1	0.8063	ELK	4266.93
Traes_2AS_FC3F1F39A.1	TraesCS2A02G144100.2	0.9242	B3 DNA binding domain	4266.48
TRAES3BF111600080CFD_	TraesCS3D02G364900.1	0.9514		4266.27
Traes_2BL_0AED4E377.1	TraesCS2B02G627200.1	0.9231	NAC domain-containing protein 7	4265.79
Traes_5BL_04BDEB5D8.2	TraesCS5B02G417000.1	0.8971	Belongs to the GRAS family(PAT1)	4265.25
Traes_7DL_090D0E08E.3	TraesCS7D02G409100.1	0.759	MYB-CC type transfactor, LHEQLE motif	4264.86
Traes_2AL_82C3E7E14.1	TraesCS2A02G386300.1	0.75	No apical meristem (NAM) protein	4264.69
Traes_5AL_0A37969AE.2	TraesCS5A02G363700.1	0.8839	B3 DNA binding domain	4263.02
Traes_4AL_F18648C49.1	TraesCS4A02G314600.1	0.8201	DNA-binding domain in plant proteins such as APETALA2 and EREBPs	4262.32
Traes_2BL_41EDFCA77.1	TraesCS2B02G346300.1	0.7692	Zinc finger, C2H2 type family protein	4259.83
Traes_1AL_C4FA8404A.2	TraesCS1A02G266300.2	0.9931	No apical meristem (NAM) protein	4258.47
Traes_6BS_B50BEBC7E.2	TraesCS6B02G174400.1	0.7708	Transcriptional activator that binds specific DNA sequence	4257.44
Traes_1DL_B503A6C26.1	TraesCS1D02G310200.1	0.779	Histone-like transcription factor (CBF/NF-Y) and archaeal histone	4256.32
Traes_1DL_7FAB00DBB.2	TraesCS1D02G139300.1	0.8097	Transcription factor DP	4255.03
Traes_5DS_976CBF9EB.2	TraesCS5D02G124200.1	1	zinc finger	4253.71
Traes_5AS_282747CEF.2	TraesCS5A02G053800.1	0.7193	Tesmin/TSO1-like CXC domain	4249.37
Traes_6DL_2BAA4B7AA.1	TraesCS6D02G285400.1	0.9893	DNA-binding domain in plant proteins such as APETALA2 and EREBPs	4247.94
Traes_2AL_C3E7F1648.1	TraesCS2A02G561300.1	0.9441	GATA zinc finger	4247.66
Traes_5AL_A5234EC05.1	TraesCS5A02G549700.1	0.9001	MEKHLA domain	4240.35
Traes_7AS_DECB8080D.1	TraesCS7A02G146400.1	0.7267	Transcriptional activator that binds specific DNA sequence	4239.78
Traes_4DL_D0F3E9568.2	TraesCS4D02G348900.2	0.8694	FFAT motif binding	4239.23
Traes_3AS_16C02FAE7.2	TraesCS3A02G157500.2	0.9361	B3 DNA binding domain	4235.98
Traes_2DS_6584E8617.2	TraesCS2D02G148000.1	1	B3 DNA binding domain	4235.29
Traes_6BS_2951D8114.2	TraesCS6B02G185700.1	0.831	Histone-like transcription factor (CBF/NF-Y) and archaeal histone	4233.91
Traes_5BL_E491AA5F3.1	TraesCS5B02G410200.1	0.9681	DNA-binding domain in plant proteins such as APETALA2 and EREBPs	4232.09
Traes_4AL_9E0D1CFA6.1	TraesCS4A02G193600.1	0.7	WRKY DNA -binding domain	4230.42
Traes_4DS_FE38A59D0.1	TraesCS4A02G193600.1	0.7	WRKY DNA -binding domain	4230.42
TRAES3BF012200020CFD_	TraesCS3D02G361600.1	0.7906		4230.02
TRAES3BF062500050CFD_	TraesCS3B02G191600.1	0.7474		4228.18
Traes_6DS_691A715BD.1	TraesCS6D02G134900.1	0.7988	BEST Arabidopsis thaliana protein match is	4226.91
Traes_1BL_B03720C3B.2	TraesCS1B02G285800.3	0.9834	Seed dormancy control	4226.88
Traes_2BS_9C5982D89.1	TraesCS2B02G274500.1	0.9716	SNF2 family N-terminal domain	4226.22
Traes_7BL_09DD5A1DC.1	TraesCS7B02G315800.1	0.7545	MYB-CC type transfactor, LHEQLE motif	4223.71
Traes_6AS_39EE7AF68.3	TraesCS6A02G176600.1	0.9868		4218
Traes_2AS_F4CEC9849.2	TraesCS2A02G105600.1	0.8252	CW-type Zinc Finger(HSI2)	4217.67
Traes_4BS_A05D3DC53.1	TraesCS4B02G124000.1	0.709	Belongs to the GRAS family(SCR)	4216.86
Traes_2DS_4C8E5F416.1	TraesCS2D02G019300.1	0.9292	TCP family transcription factor	4214.44
Traes_5BL_DDC2491F7.1	TraesCS5B02G235200.1	0.9191	Helix-loop-helix DNA-binding domain	4213.36
TRAES3BF114600210CFD_	TraesCS3B02G427300.1	0.967		4210.78
Traes_4AL_F1DC044FA.1	TraesCS4A02G294700.2	1	Myb/SANT-like DNA-binding domain	4209.56
TRAES3BF099200070CFD_	TraesCS3B02G368400.1	1		4209
Traes_5BS_86C1C9A9F.2	TraesCS7A02G014500.1	0.9217	FAR1 DNA-binding domain	4207.52
Traes_5BS_EB206B8BC.1	TraesCS5B02G043100.1	0.8237	single-stranded telomeric DNA binding	4203.44
Traes_2AS_506D953C1.1	TraesCS2A02G163000.1	0.8127	calmodulin-binding transcription activator	4202.22
Traes_4DS_66942ADD7.1	TraesCS4D02G019600.2	0.7931	Homeobox protein knotted-1-like	4201.26
Traes_6AL_FD6EC5EA9.1	TraesCS6A02G358400.3	1	helix loop helix domain	4198.7
Traes_5BS_FED4AE2C5.2	TraesCS5B02G062400.1	0.7205	Tesmin/TSO1-like CXC domain	4197.96
Traes_3AL_F09C7CA19.1	TraesCS3A02G336500.1	0.8486	Transcriptional activator of alpha-amylase expression(GAMYB)	4192.58
Traes_4BS_929E7B27B.2	TraesCS4B02G028500.1	0.7571	Tesmin/TSO1-like CXC domain	4188.46
Traes_7DS_78B5508C0.2	TraesCS7D02G210600.1	0.7273	NAC domain transcription factor superfamily protein	4188
Traes_5BL_027509D0D.1	TraesCS5B02G312800.1	1	DNA-binding domain in plant proteins such as APETALA2 and EREBPs	4187.37
Traes_2BL_B397F2CE3.1	TraesCS2B02G529200.1	0.724	DNA-binding domain in plant proteins such as APETALA2 and EREBPs	4184.34
Traes_7DL_343A252DC.1	TraesCS7D02G409700.1	0.8539	Auxin response factors (ARFs) are transcriptional factors that bind specifically to the DNA sequence 5'-TGTCTC-3' found in the auxin-responsive promoter elements (AuxREs)	4184.16
Traes_4BS_071700C53.1	TraesCS4D02G135900.1	0.9427	Belongs to the GRAS family	4184.1
Traes_4DL_C083C804E.1	TraesCS4D02G177000.1	0.8425	Ethylene insensitive 3(EIL1)	4183.67
Traes_3DL_80E8CBB73.1	TraesCS7A02G014500.1	0.7186	Protein FAR1-RELATED SEQUENCE	4183.28
Traes_2DL_474B433DF.1	TraesCS2D02G282800.4	0.7603	CG-1	4182.87
Traes_5DS_4F7973584.1	TraesCS5D02G025800.1	0.7909	Basic region leucine zipper	4181.81
Traes_2AS_53BFA14C7.2	TraesCS2A02G204500.1	0.7193	HSF-type DNA-binding(HSFA3)	4180.21
Traes_6BL_948834CD4.2	TraesCS6A02G273000.3	0.7538	helix loop helix domain	4177.76
Traes_5BS_E5403F537.1	TraesCS5B02G105500.1	0.8724	Zinc finger CCCH domain-containing protein	4177.46
Traes_2DL_607AD3522.1	TraesCS2D02G576300.1	0.9263	NAC domain-containing protein 7	4175.89
Traes_2DL_640A09678.2	TraesCS2D02G568600.2	1	GATA zinc finger	4173.94
TRAES3BF105800110CFD_	TraesCS3B02G447100.1	0.7378		4172.18
Traes_7BS_39A9F4AEC.2	TraesCS7B02G125500.1	0.8036	CCT motif(COL9)	4168.93
TRAES3BF020500010CFD_	TraesCS3B02G184200.1	0.8914		4168.03
Traes_2AL_ACBAA6A31.1	TraesCS2A02G515300.1	0.9407	helix loop helix domain	4167.48
Traes_5DL_3EC609F62.1	TraesCS5D02G148000.1	0.7869	Belongs to the GRAS family(SCR)	4164.46
Traes_2BS_924D34AA1.1	TraesCS2B02G119000.1	0.7243	No apical meristem (NAM) protein	4161.93
Traes_2AL_89543BA1A.1	TraesCS2A02G309300.1	0.7701	Auxin response factors (ARFs) are transcriptional factors that bind specifically to the DNA sequence 5'-TGTCTC-3' found in the auxin-responsive promoter elements (AuxREs)	4161
Traes_2DL_912473A86.1	TraesCS2D02G412500.1	0.9538	Myb-like DNA-binding domain	4159.92
Traes_2AS_40FA27AE7.1	TraesCS2A02G230400.1	0.7493	Myb-like DNA-binding domain	4158.46
Traes_2BS_B1A73C7A8.1	TraesCS2B02G221700.1	0.7677	AP2 domain	4158.22
Traes_4AS_19FA06316.1	TraesCS4A02G088500.1	0.8479	Belongs to the GRAS family	4155.97
Traes_7AS_D56F0F9E5.4	TraesCS7A02G157700.1	0.7362	helix loop helix domain	4155.04
Traes_7DL_F43F7A9A3.4	TraesCS7D02G319600.1	0.8231	Helix-loop-helix DNA-binding domain	4154.53
TRAES3BF024100110CFD_	TraesCS3B02G453300.1	0.7402		4149.63
Traes_5BL_C2576EA84.1	TraesCS5B02G216500.1	1	zinc finger	4146.21
Traes_5BL_B9DD3E76F.1	TraesCS5B02G558100.2	0.9756	WRKY DNA -binding domain(WRKY14)	4144.21
Traes_5BL_B820523A7.2	TraesCS5B02G224200.1	0.841	helix loop helix domain	4142.57
Traes_4DL_1C0F38900.1	TraesCS4D02G329100.1	0.7455	Helix-loop-helix DNA-binding domain	4141.46
Traes_5DL_88247E2B8.1	TraesCS5D02G419400.2	0.8373	Belongs to the GRAS family(PAT1)	4140.08
Traes_5DS_51467BEB4.1	TraesCS5D02G078800.1	0.7059	Helix-loop-helix DNA-binding domain	4139.87
Traes_5BL_63E444E80.2	TraesCS5B02G178600.1	0.9579	DNA-binding domain in plant proteins such as APETALA2 and EREBPs	4139.44
Traes_4DS_F8FC0C699.6	TraesCS4D02G136500.1	0.956	Belongs to the GRAS family	4137.14
Traes_2BS_C116E5668.1	TraesCS2B02G119100.1	0.9466	No apical meristem (NAM) protein	4136.58
Traes_4BS_DD5E68382.1	TraesCS4B02G088900.1	0.8066	DNA-binding domain in plant proteins such as APETALA2 and EREBPs	4132.95
Traes_2DL_A86E54838.2	TraesCS2D02G307600.1	0.7724	Auxin response factors (ARFs) are transcriptional factors that bind specifically to the DNA sequence 5'-TGTCTC-3' found in the auxin-responsive promoter elements (AuxREs)	4132.75
Traes_3DS_0E0A747A1.1	TraesCS3D02G107800.3	0.731	MYB-CC type transfactor, LHEQLE motif	4132.65
TRAES3BF111600210CFD_	TraesCS3B02G486000.1	0.8185		4132.23
Traes_6BL_FDC8BDE8A.1	TraesCS6B02G233700.1	0.9304	E2F transcription factor CC-MB domain(E2F3)	4131.64
Traes_5BL_573ABF1D7.1	TraesCS5B02G142200.1	0.8487	bZIP Maf transcription factor	4131.19
Traes_2DL_243DA9D84.2	TraesCS2D02G246600.1	0.8147	QLQ	4126.15
Traes_6BL_435A95A74.2	TraesCS6B02G361300.1	0.9173	Myb DNA-binding like	4124.89
Traes_3DL_C5832B670.1	TraesCS3A02G405200.1	0.7629	heat shock factor	4124.31
Traes_1BL_8925B27BC.1	TraesCS1D02G194200.1	0.9522	No apical meristem (NAM) protein	4123.8
Traes_2AL_E5A9615E2.3	TraesCS2A02G417100.1	1	DNA-binding domain in plant proteins such as APETALA2 and EREBPs(ERF5)	4119.19
Traes_2DS_8C3F6A558.1	TraesCS2D02G061500.1	0.7105	No apical meristem (NAM) protein	4114.86
TRAES3BF006500040CFD_	TraesCS3B02G550700.1	1		4114.73
TRAES3BF003300050CFD_	TraesCS3B02G550700.1	1		4114.73
TRAES3BF136000020CFD_	TraesCS3B02G549800.1	0.9022		4113.18
Traes_3DS_72524290F.1	TraesCS3D02G193100.1	0.9678	Dof domain, zinc finger	4112.2
Traes_1DL_F410CF9FD.3	TraesCS1D02G266500.1	0.9975	No apical meristem (NAM) protein	4110.46
Traes_4DS_7488F4608.1	TraesCS4D02G079500.1	1	Helix-loop-helix DNA-binding domain	4109.06
TRAES3BF020500020CFD_	TraesCS3B02G184200.1	0.8935		4107.66
Traes_7AL_84F34A1C2.1	TraesCS7D02G400000.1	0.984	Domain of unknown function (DUF702)	4106.86
TRAES3BF011300020CFD_	TraesCS3B02G162300.1	1		4106.29
Traes_4AS_E1E60C5E5.1	TraesCS4A02G058900.2	0.7	MADS-box transcription factor 1(AGL2)	4105.51
Traes_6AS_C1A37E015.1	TraesCS6A02G142000.1	0.9149	Helix-loop-helix DNA-binding domain	4103.76
Traes_7AL_F36D340F4.1	TraesCS6D02G102300.1	0.8504	Auxin response factors (ARFs) are transcriptional factors that bind specifically to the DNA sequence 5'-TGTCTC-3' found in the auxin-responsive promoter elements (AuxREs)	4103.34
Traes_5DS_AACA2EBA3.2	TraesCS5D02G113300.1	0.951	Myb-like DNA-binding domain	4103.32
Traes_6BL_600E4507F.1	TraesCS6B02G295900.1	0.715		4100.85
Traes_1AS_34B6145E5.3	TraesCS1A02G068300.3	0.9716	SANT SWI3, ADA2, N-CoR and TFIIIB'' DNA-binding domains	4099.54
Traes_5BL_6647931E2.1	TraesCS5B02G312900.1	0.7773	DNA-binding domain in plant proteins such as APETALA2 and EREBPs	4096.15
Traes_3DS_61692C8F3.1	TraesCS3D02G111100.1	0.7196	Myb-like DNA-binding domain	4095.09
Traes_2BL_593E1CCC2.1	TraesCS2B02G434300.1	0.8069	Transcription factor	4094.2
Traes_1DL_B7E76AFE6.1	TraesCS1D02G428400.1	0.7803	SANT SWI3, ADA2, N-CoR and TFIIIB'' DNA-binding domains	4093.28
Traes_2BS_03909B330.1	TraesCS2B02G025700.1	0.9286	TCP family transcription factor	4092.99
Traes_4AL_3AFF9664B.2	TraesCS4A02G420900.1	0.9751	NAC domain-containing protein 43	4091.99
TRAES3BF057600060CFD_	TraesCS3B02G373800.1	0.7695		4089.21
Traes_1DS_2BB06F54C.1	TraesCS1D02G059200.1	0.8299	DNA-binding domain in plant proteins such as APETALA2 and EREBPs	4089.18
Traes_7BS_63CE69B1D.1	TraesCS7B02G142200.2	0.9795	SBP domain(SPL14)	4088.59
Traes_5DL_0B2C5ADF6.1	TraesCS5D02G326600.1	0.7823	Myb-like DNA-binding domain	4086.97
Traes_3B_30A3E17C6.1	TraesCS3B02G184200.1	0.929		4085.64
Traes_2BL_855A1170C.2	TraesCS2D02G412500.1	0.7267	Myb-like DNA-binding domain	4084.73
Traes_2DS_B6872CB84.1	TraesCS2D02G087400.1	0.9733	heat shock factor	4084.39
Traes_2AL_BC4CD296F.1	TraesCS2A02G404400.1	0.707	RWP-RK domain	4082.19
Traes_4AL_096D26391.2	TraesCS4A02G284600.3	0.7658	Tesmin/TSO1-like CXC domain	4081.05
Traes_4AL_2F7E6536A.2	TraesCS4A02G407100.2	0.9802	ankyrin repeats	4080.44
Traes_2DL_A84C58DC2.1	TraesCS2D02G254400.3	0.7955	helix loop helix domain	4080.11
Traes_6BL_9DC9A9192.2	TraesCS6B02G378200.1	0.8479	SANT SWI3, ADA2, N-CoR and TFIIIB'' DNA-binding domains	4078.59
Traes_2DL_2536A1C8C.2	TraesCS2D02G286300.1	0.7428	DNA-binding domain in plant proteins such as APETALA2 and EREBPs	4077.79
Traes_7DL_70D4FDB2A.1	TraesCS7D02G519200.1	1	Basic region leucine zipper	4077.45
Traes_6AL_FACBEB134.1	TraesCS6A02G273000.1	0.7393	helix loop helix domain	4076.76
Traes_2AL_0F613C5AB.1	TraesCS2A02G352400.2	0.7595	RWP-RK domain	4075.32
Traes_5DL_76B9DF62C.1	TraesCS5D02G198900.1	0.8517	zinc finger CCCH domain-containing protein	4075.25
Traes_4DS_A28BC582A.1	TraesCS4B02G023300.1	0.9276	MADS	4067.02
Traes_5BL_C1D6B6B74.2	TraesCS5B02G399900.1	0.6143	DNA binding domain(WRKY57)	4064.28
TRAES3BF020200120CFD_	TraesCS3B02G036000.1	0.7105		4063.39
Traes_7DL_0176A3542.1	TraesCS7D02G338500.1	0.9687	Tesmin/TSO1-like CXC domain	4062.37
TRAES3BF025700020CFD_	TraesCS4B02G383400.1	0.7722		4061.94
TRAES3BF046300130CFD_	TraesCS3B02G326000.1	0.7127		4060.87
TRAES3BF073300120CFD_	TraesCS3B02G315600.1	0.7465		4060.12
Traes_4BL_C8067812A.2	TraesCS4B02G110300.1	0.702	Protein FAR1-RELATED SEQUENCE	4059.36
Traes_5BS_2CB91C54A.1	TraesCS5B02G105900.1	0.933	Myb-like DNA-binding domain	4058.67
Traes_3AS_475B27CF6.1	TraesCS3A02G094300.1	1	SANT SWI3, ADA2, N-CoR and TFIIIB'' DNA-binding domains	4057.51
Traes_4AS_C30034054.1	TraesCS4A02G039000.1	0.7237	Belongs to the GRAS family(PAT1)	4057.4
Traes_5BL_FCF62F21B.1	TraesCS5B02G317700.1	0.8048	B-box zinc finger	4057.24
Traes_6DL_8BAAC240D.1	TraesCS6D02G249200.1	0.7492	Myb-like DNA-binding domain	4056.93
Traes_4BS_20BE06923.2	TraesCS4B02G114600.1	0.7955	domain associated with HOX domains	4056.06
Traes_4BL_A37F6FD08.3	TraesCS4B02G306300.1	0.8125	ankyrin repeats	4055.99
Traes_5AL_B4E8A3115.2	TraesCS5A02G344100.1	0.7019	NB-ARC domain	4055.27
TRAES3BF066700010CFD_	TraesCS3B02G131700.9	0.9777		4054.44
Traes_2BL_1AED96909.1	TraesCS2B02G326400.1	0.7731	Auxin response factors (ARFs) are transcriptional factors that bind specifically to the DNA sequence 5'-TGTCTC-3' found in the auxin-responsive promoter elements (AuxREs)	4053.66
Traes_2BS_659F9ABB9.1	TraesCS2B02G212700.1	0.7595	helix loop helix domain	4053.1
Traes_4DL_2527CA8BF.2	TraesCS4D02G239900.1	0.8446	Transcriptional activator that binds specific DNA sequence	4052.95
TRAES3BF075700010CFD_	TraesCS3B02G122800.1	0.9976		4052.67
Traes_2BS_EEE045515.2	TraesCS2B02G176900.1	0.8	Protein of unknown function, DUF573	4051.84
Traes_7DL_ED348696E.1	TraesCS7D02G482500.1	0.7766	Squamosa promoter-binding-like protein	4049.87
TRAES3BF021100090CFD_	TraesCS3B02G256000.1	0.7711		4049.44
TRAES3BF021300010CFD_	TraesCS3B02G256000.1	0.7711		4049.44
TRAES3BF107400040CFD_	TraesCS3B02G423600.1	0.8198		4049.12
TRAES3BF094200030CFD_	TraesCS3B02G423600.1	0.8198		4049.12
Traes_2BS_1484A7516.1	TraesCS2B02G232000.2	1	HSF-type DNA-binding(HSFA3)	4048.65
TRAES3BF027700010CFD_	TraesCS3B02G367500.1	0.8739		4048.65
Traes_3DL_6B1815F7D.1	TraesCS3A02G341700.1	0.7686	WUSCHEL-related homeobox	4046.7
Traes_3AL_9D2735F60.1	TraesCS3A02G391600.1	0.7977	Transcriptional activator that binds specific DNA sequence	4044.6
Traes_6AL_DD0E18465.2	TraesCS6A02G311700.2	0.7405	E2F/DP family winged-helix DNA-binding domain(DEL1)	4044.42
Traes_4AL_A5BC0BDBA.2	TraesCS4A02G289500.1	0.948	domain associated with HOX domains	4041.37
Traes_1BL_6F280C355.1	TraesCS1B02G156900.1	0.8065	Transcription factor DP	4041.24
Traes_6DL_901793D6D.2	TraesCS6D02G232700.1	0.7633	DNA-binding domain in plant proteins such as APETALA2 and EREBPs	4039.87
Traes_2AS_CA4D79100.1	TraesCS2B02G256600.2	0.8185	QLQ	4039.81
Traes_7AL_34519AA27.1	TraesCS7B02G377200.1	0.996	Nuclear transcription factor Y subunit	4039.77
Traes_2DS_7C9C33E09.1	TraesCS2D02G193700.1	0.7698	helix loop helix domain	4039.63
Traes_6AS_3E534A2C1.1	TraesCS6A02G120600.1	1	homeobox-leucine zipper protein HOX26	4036.52
Traes_5DL_EF9AFFB3D.2	TraesCS7A02G014500.1	0.9711	FAR1 DNA-binding domain	4034.59
Traes_7AL_B3B78EE36.1	TraesCS7A02G341100.2	1	Tesmin/TSO1-like CXC domain	4033.97
Traes_7AS_A337F362A.1	TraesCS7A02G121900.1	0.7619	Myb-like DNA-binding domain	4033.72
Traes_2AS_9A3F73BE3.1	TraesCS2A02G194200.1	0.7552	helix loop helix domain	4033.12
Traes_7BS_CF3224FD0.1	TraesCS7B02G100300.1	0.705	Protein CUP-SHAPED COTYLEDON 2	4030.09
Traes_7DL_310E46F15.3	TraesCS7D02G295400.3	0.707	Protein LHY-like isoform X1(CCA1)	4027.62
Traes_7DL_57A842933.2	TraesCS7B02G208600.1	1	START domain	4027.49
Traes_6AS_90DEDA6E3.2	TraesCS6A02G102400.1	0.9228	RWP-RK domain	4027.17
Traes_7AL_A8CAE984E.1	TraesCS7A02G420400.1	0.9935	Basic region leucine zipper	4026.73
Traes_7DS_C6A3C10A6.1	TraesCS7D02G171300.1	0.9865	bZIP Maf transcription factor(ABF1)	4024.94
Traes_6AS_A42E71A00.1	TraesCS6A02G146200.1	0.7898	Transcriptional activator that binds specific DNA sequence	4023.99
Traes_5BS_80C46D9C4.2	TraesCS5B02G118200.1	0.9346	DNA-binding domain in plant proteins such as APETALA2 and EREBPs	4023.7
Traes_1AL_C340A8E74.2	TraesCS1A02G302700.1	0.9923	B3 DNA binding domain	4023.13
Traes_4AL_D2D7703821.	TraesCS4A02G227400.1	0.7967		4021.25
Traes_4DS_97AC77E13.1	TraesCS4A02G227400.1	0.7967	DNA-binding domain in plant proteins such as APETALA2 and EREBPs	4021.25
Traes_4BS_9B385BB1C.2	TraesCS4B02G059000.1	0.791	Helix-loop-helix DNA-binding domain	4021.08
Traes_1BL_7513DC3F9.2	TraesCS1B02G322000.1	0.7724	Histone-like transcription factor (CBF/NF-Y) and archaeal histone	4018.38
Traes_5BL_B2792D532.2	TraesCS5B02G410600.1	0.9724	sequence-specific DNA binding	4018.34
Traes_2AS_C4568AE60.1	TraesCS2A02G157800.1	0.996	helix loop helix domain	4017.38
Traes_2BL_0C41F5FAB.1	TraesCS2B02G618500.1	1	GATA zinc finger	4016.9
Traes_3B_A25F058E5.1	TraesCS3B02G392600.1	0.8066		4014.67
Traes_2DL_81E326F1A.2	TraesCS2D02G414500.1	0.8644	DNA-binding domain in plant proteins such as APETALA2 and EREBPs(ERF5)	4014.33
Traes_2BS_23097C174.1	TraesCS2B02G051800.1	0.9639	Belongs to the class I-like SAM-binding methyltransferase superfamily. RNA M5U methyltransferase family	4013.48
TRAES3BF084200010CFD_	TraesCS3B02G158000.1	0.9148		4012.63
Traes_5DL_6003530B1.1	TraesCS5D02G314900.1	0.8657	DNA-binding domain in plant proteins such as APETALA2 and EREBPs	4012.08
Traes_1DL_1806CFE5F1.	TraesCS1D02G302100.1	1		4008.86
Traes_1DL_1806CFE5F.1	TraesCS1D02G302100.1	1	B3 DNA binding domain	4008.86
Traes_5AL_206C0CE33.2	TraesCS5A02G124200.1	0.7273	Myb/SANT-like DNA-binding domain	4007.97
Traes_1DL_EED669F6A1.	TraesCS1D02G314900.1	0.9114		4007.6
Traes_1DL_EED669F6A.1	TraesCS1D02G314900.1	0.9114	Transcription factor tfiiib component	4007.6
Traes_1AS_0523686DD.1	TraesCS1A02G091100.1	0.9888	chromatin-remodeling complex ATPase	4006.62
Traes_2BL_E5F50498D.1	TraesCS2B02G304800.1	0.7486	DNA-binding domain in plant proteins such as APETALA2 and EREBPs	4006.18
Traes_1BS_92EA1F290.1	TraesCS1B02G100600.1	0.9321	Myb-like DNA-binding domain	4005.54
Traes_5AL_16AD8DEEC.1	TraesCS5A02G437900.1	0.7132	heat shock factor	4005.45
Traes_7BS_13A10F9A4.2	TraesCS7B02G062100.2	0.7273	helix loop helix domain	4004.43
Traes_2AS_9AEA9BDEA.1	TraesCS2A02G081300.1	1	Transcription factor	4003.94
Traes_7AS_B6ADF4159.1	TraesCS7A02G219600.1	0.9875	SANT SWI3, ADA2, N-CoR and TFIIIB'' DNA-binding domains	4002.42
TRAES3BF039800050CFD_	TraesCS3B02G397100.1	0.9979		4002.39
Traes_4BS_9BFCC52AD.1	TraesCS4B02G080700.1	0.9551	Helix-loop-helix DNA-binding domain	4002.3
Traes_1AL_A9FB6BF52.1	TraesCS1A02G221900.2	0.954	AP2 domain	4002.11
TRAES3BF068500020CFD_	TraesCS3B02G105700.2	0.7169		4001.41
TRAES3BF025700040CFD_	TraesCS3B02G568200.1	0.8079		3998.97
Traes_5AL_315285EFC1.	TraesCS5A02G349500.1	0.7945		3998.41
Traes_5AL_315285EFC.1	TraesCS5A02G349500.1	0.7945	transcription, DNA-templated	3998.41
Traes_5BS_0F8DBB33D.2	TraesCS5B02G074500.1	0.9448	Helix-loop-helix DNA-binding domain	3997.73
Traes_4DS_35269C392.1	TraesCS4D02G111900.1	0.7968	domain associated with HOX domains	3996.45
Traes_7DS_5084227F2.1	TraesCS7D02G223100.1	0.8552	-	3995.97
Traes_4AS_4F615C5CC.2	TraesCS4A02G022700.1	0.9728	domain associated with HOX domains	3995.53
Traes_6DS_A08A13944.1	TraesCS6D02G153000.1	0.7077	Belongs to the GRAS family	3995.27
Traes_6AL_BB7207AD1.1	TraesCS6A02G237900.1	0.8348	No apical meristem (NAM) protein	3991.45
Traes_1BL_B4AFDB663.1	TraesCS1B02G310900.1	0.9965	WRKY DNA -binding domain	3991.44
Traes_3DS_ECB844CBC.1	TraesCS3A02G157500.2	1	B3 DNA binding domain	3988.55
Traes_7DL_AD4395F8F.1	TraesCS7D02G340300.1	0.708	Myb-like DNA-binding domain	3988.51
Traes_2AL_C70217249.1	TraesCS2A02G567300.1	0.963	Auxin response factors (ARFs) are transcriptional factors that bind specifically to the DNA sequence 5'-TGTCTC-3' found in the auxin-responsive promoter elements (AuxREs)	3985.38
Traes_2DS_C83B7F5CF.1	TraesCS6A02G118800.1	0.8944	GATA zinc finger	3982.09
Traes_2AS_87EF37490.1	TraesCS2A02G079700.1	0.9127	SANT SWI3, ADA2, N-CoR and TFIIIB'' DNA-binding domains	3981.04
Traes_5DL_2CF55DD05.1	TraesCS5D02G150500.1	0.7359	DNA-binding domain in plant proteins such as APETALA2 and EREBPs(WRI1)	3980.62
Traes_3AL_D6813CBDE.1	TraesCS3A02G231600.1	0.9022	homeobox associated leucin zipper	3978.36
Traes_6DS_3D001FAB6.1	TraesCS6D02G091000.1	0.9321	RWP-RK domain	3978.07
Traes_5BS_F9D2C42AB.1	TraesCS5B02G062200.1	0.7211	Tesmin/TSO1-like CXC domain	3977.93
TRAES3BF007400020CFD_	TraesCS3B02G190300.1	0.8573		3976.35
Traes_4DS_2B4E99BE4.2	TraesCS4D02G136100.1	0.8311	Belongs to the GRAS family	3975.59
Traes_3AS_6DA07CB6A.1	TraesCS3A02G175700.1	0.8088	Zinc finger CCCH domain-containing protein 4	3974.97
Traes_5BL_60FC12DA6.2	TraesCS5B02G118200.1	0.9379	DNA-binding domain in plant proteins such as APETALA2 and EREBPs	3974.73
Traes_3DL_575C5670C.2	TraesCS7A02G014500.1	0.8043	Protein FAR1-RELATED SEQUENCE	3974.2
Traes_6DL_26DDCA106.1	TraesCS6D02G229400.1	0.8014	Belongs to the GRAS family	3973.17
Traes_5BL_3503725F1.2	TraesCS5B02G512800.1	0.7684	Squamosa promoter-binding-like protein(SPL1)	3972.01
Traes_6BS_AB5909D02.2	TraesCS6B02G146800.2	1	GATA zinc finger	3971.44
TRAES3BF169000100CFD_	TraesCS3B02G474700.1	0.9449		3971.34
Traes_5BL_57ABE6426.1	TraesCS5B02G415700.1	0.7605	No apical meristem (NAM) protein	3971.33
Traes_1AL_9ADA7A031.1	TraesCS1A02G358400.1	0.9273	WRKY DNA -binding domain	3970.42
Traes_5BL_1E751EF1F.1	TraesCS5B02G326100.1	0.8229	NB-ARC domain	3970.39
Traes_2AS_7A127A218.1	TraesCS2A02G153200.1	0.9548	B3 DNA binding domain	3969.66
Traes_5BL_700283665.2	TraesCS5D02G419400.2	0.8324	Belongs to the GRAS family(PAT1)	3969.2
Traes_6BL_B27806C89.1	TraesCS6B02G237900.3	0.9336	No apical meristem (NAM) protein	3969.04
Traes_2BL_9528AAD7C.2	TraesCS2B02G556600.1	1	Seed dormancy control	3968.9
Traes_5BS_77558D2A3.2	TraesCS5B02G032000.1	0.7729	TCP family transcription factor	3964.92
Traes_6BL_CC009B78A.2	TraesCS6B02G230700.5	1	Zinc finger, C2H2 type	3958.96
Traes_5BL_4E044468C.1	TraesCS5B02G308400.1	0.7908	DNA-binding domain in plant proteins such as APETALA2 and EREBPs	3958.78
Traes_4AL_6A6EC9A6A.2	TraesCS4A02G234500.1	0.9519	Helix-loop-helix DNA-binding domain	3958.39
Traes_2AL_DB6FB44F8.1	TraesCSU02G137200.2	0.9384	No apical meristem (NAM) protein	3958.32
Traes_6AS_10D92215D.2	TraesCS6A02G138600.4	0.8372	Auxin response factors (ARFs) are transcriptional factors that bind specifically to the DNA sequence 5'-TGTCTC-3' found in the auxin-responsive promoter elements (AuxREs)(ARF6)	3958.21
Traes_1AL_88D49649D.1	TraesCS1A02G220000.1	0.718	AP2 domain	3955.08
Traes_4DL_88ABAD6C0.1	TraesCS4D02G286400.1	0.8696	Homeobox associated leucine zipper	3952.11
Traes_6AL_FD17E787A.1	TraesCS6A02G374600.1	0.8116	GATA zinc finger	3952.1
Traes_3AL_8EF6D8BB1.2	TraesCS3A02G433300.2	0.7108	CG-1	3950.61
Traes_4DL_964466BEC.1	TraesCS4D02G276100.1	0.8493	transcription regulatory region sequence-specific DNA binding	3948.73
Traes_5DS_675BEBC7B.2	TraesCS5D02G102200.1	1	helicase protein	3948.7
Traes_5DL_1950C1FC2.2	TraesCS5D02G273500.1	0.9674	Seed dormancy control	3948.24
Traes_6BL_6AEADC565.2	TraesCS6B02G375400.1	0.7765	Ethylene-responsive transcription factor 1	3948.13
Traes_6AS_448C7608C.2	TraesCS6A02G042800.1	0.7616	Zinc finger, C2H2 type	3947.82
Traes_6DS_2B2F9C290.2	TraesCS6D02G049400.1	0.7593	Zinc finger, C2H2 type	3946.62
Traes_7DL_C89614A4D.1	TraesCS7D02G449900.2	0.901	Auxin response factors (ARFs) are transcriptional factors that bind specifically to the DNA sequence 5'-TGTCTC-3' found in the auxin-responsive promoter elements (AuxREs)(ARF6)	3946.32
Traes_2AL_8EE7F34F6.2	TraesCS2A02G566100.1	0.8942	NAC domain-containing protein 7	3945.35
Traes_7AL_BB7235524.1	TraesCS7A02G475400.1	0.7534	Nuclear transcription factor Y subunit	3944.73
TRAES3BF048900180CFD_	TraesCS3B02G319400.2	1		3944.14
Traes_1BL_F1D5BF5F8.2	TraesCS1B02G214500.1	1	MADS	3942.99
Traes_7DS_9B463F375.2	TraesCS7D02G220300.1	0.8203	CCT motif(COL9)	3942.83
Traes_2BS_5B00A8C50.1	TraesCS2B02G122500.1	0.8328	CW-type Zinc Finger(HSI2)	3941.71
Traes_7DL_5BD0D4BD1.1	TraesCS7D02G300000.1	0.7678	Myb-like DNA-binding domain	3940.71
Traes_2BS_736EF207B1.	TraesCS2B02G214600.1	0.9271		3940.15
Traes_4DL_E6F4A32C9.1	TraesCS4D02G322400.1	0.7854	RWP-RK domain	3938.27
Traes_4BS_6D714F995.1	TraesCS4B02G280700.1	0.9966	domain associated with HOX domains	3937.9
Traes_4BL_6D714F995.1	TraesCS4B02G280700.1	0.9966	domain associated with HOX domains	3937.9
Traes_2BS_D32231DB0.1	TraesCS2B02G112100.1	0.8307	Belongs to the GRAS family	3937.64
Traes_2BS_E3CBE0B73.1	TraesCS2B02G256600.2	0.8108	QLQ	3935.66
Traes_7DS_4053B6E88.1	TraesCS7D02G230600.1	0.9481	helix loop helix domain	3934.78
Traes_6AL_46B659A23.2	TraesCS5A02G460800.2	1	basic region leucin zipper(GBF1)	3934.4
Traes_4AL_61B6D8837.1	TraesCS4A02G200700.5	0.972	bHLH-MYC and R2R3-MYB transcription factors N-terminal	3929.8
TRAES3BF001100060CFD_	TraesCS3B02G476000.1	0.7665		3929.22
TRAES3BF058400020CFD_	TraesCS3B02G284800.1	0.7974		3928.99
Traes_7DS_405F08A53.1	TraesCS7D02G189500.1	0.8844	RWP-RK domain	3928.72
Traes_5DL_D1D0CA79E.1	TraesCS5D02G148800.1	0.9874	No apical meristem (NAM) protein(NAP)	3927.76
Traes_5AS_7E3208FD4.1	TraesCS5D02G124200.1	0.9773	zinc finger	3927.55
Traes_6AL_47F6C4665.1	TraesCS6A02G239200.1	1	Transcriptional activator that specifically binds 5'- GATA-3' or 5'-GAT-3' motifs within gene promoters	3926.92
Traes_2BL_1F5DBD5D5.1	TraesCS2B02G497500.1	0.8261	Homeobox-leucine zipper protein	3926.64
Traes_3AL_F9CB475F5.2	TraesCS3A02G273300.1	0.971	Homeobox KN domain	3925.46
Traes_6AL_4084532FC1.	TraesCS6A02G247200.1	0.7978		3925.35
Traes_7DL_04FC0BF21.2	TraesCS7D02G347900.1	1	Transcription factor BIM2	3922.92
Traes_6DL_493269065.2	TraesCS6D02G246100.2	0.976	Helix-loop-helix DNA-binding domain	3921.88
Traes_4BS_5D04C29FF.2	TraesCS4B02G073200.1	0.9156	B3 domain-containing protein	3920.58
Traes_4DL_4C78C56A4.1	TraesCS4D02G222000.1	0.8845	Zinc finger, C3HC4 type (RING finger)	3919.65
Traes_4AL_BB3F89030.1	TraesCS4A02G312500.1	0.9078	Lateral organ boundaries (LOB) domain	3917.2
Traes_4DL_F064084A9.2	TraesCS4D02G359600.1	0.8973	MEKHLA domain	3916.97
Traes_2AL_CB84F42D2.2	TraesCS2A02G566200.1	0.9869	NAC domain-containing protein 7	3915.62
Traes_2BL_439C794F5.3	TraesCS2B02G412700.1	0.8138	B3 domain-containing protein	3914.69
Traes_7AS_D4F03387A.1	TraesCS7A02G167900.1	0.9415	Homeobox-leucine zipper protein	3913.99
TRAES3BF098000010CFD_	TraesCS1B02G272600.1	1		3913.7
TRAES3BF097200010CFD_	TraesCS1B02G272600.1	1		3913.7
Traes_4AS_E4294BADC.1	TraesCS4A02G124900.1	0.8217	Myb-like DNA-binding domain	3913.47
Traes_2BL_245DDBC7B.2	TraesCS2B02G269600.2	0.8427	Disordered region downstream of MFMR(GBF1)	3912.84
Traes_2DS_FE62DB7F5.1	TraesCS2D02G079100.1	1	Transcription factor	3911.45
TRAES3BF009800030CFD_	TraesCS3B02G305100.1	0.8328		3911.13
Traes_6DL_C27CEED76.1	TraesCS6D02G184500.2	0.7901	Myb/SANT-like DNA-binding domain	3907.92
Traes_4DL_E0847FBC5.1	TraesCS4D02G354200.1	0.9127	Lateral organ boundaries (LOB) domain	3907.62
Traes_4BL_83F647CBE.2	TraesCS4B02G235700.1	0.736	helix loop helix domain	3907.42
Traes_7AS_F46AC277B.1	TraesCS7A02G211300.1	0.7021	CCT motif(Hd1)	3906.26
Traes_1AL_FB0C83DD9.1	TraesCS1A02G319700.1	0.7817	Belongs to the GRAS family	3904.66
Traes_4AL_2334B226E.1	TraesCS4A02G292200.1	0.8118	Homeobox protein knotted-1-like	3903.72
Traes_7DL_2FE5181AF.1	TraesCS7D02G417700.1	0.9081	homeobox associated leucin zipper	3900.63
TRAES3BF106100060CFD_	TraesCS3B02G608600.1	0.9692		3899.53
Traes_4AS_7220D33B3.2	TraesCS4A02G131700.2	0.9845	MYB-CC type transfactor, LHEQLE motif	3899.38
Traes_1AL_29F610E15.1	TraesCS1D02G203900.1	0.7465	B3 DNA binding domain	3897.96
Traes_6DL_F47CFC6D9.1	TraesCS6D02G185200.2	0.8228	Zinc finger, C2H2 type	3897.71
Traes_5BL_19F383CC71.	TraesCS5B02G205600.1	1		3896.52
Traes_2BS_00566A85C.1	TraesCS2B02G118500.1	1	No apical meristem (NAM) protein	3895.9
Traes_1AS_02E068C7E.2	TraesCS1A02G039100.2	0.9885	protein desumoylation	3895.12
Traes_2DL_8F24AEC6D.3	TraesCS2D02G567000.1	0.9384	No apical meristem (NAM) protein	3894.62
Traes_6DL_1ABE78799.1	TraesCS6D02G362900.1	0.7534	No apical meristem (NAM) protein	3893.91
Traes_7DS_327FBC2CA.2	TraesCS7D02G148000.1	0.7409	Transcriptional activator that binds specific DNA sequence	3893.77
Traes_2AS_C407071E4.2	TraesCS2A02G189700.1	0.7764	WRKY transcription factor 20	3893.25
Traes_4BS_57F165BB1.1	TraesCS4B02G025400.1	0.9886	domain associated with HOX domains	3891.33
Traes_6DS_6268D31AE.1	TraesCS6D02G108700.2	0.9945	GATA zinc finger	3891.13
Traes_2BS_59D534318.1	TraesCS6A02G118800.2	0.8908	GATA zinc finger	3890.67
Traes_4BS_96AE357C6.1	TraesCS4B02G159600.1	0.7582	Protein of unknown function, DUF573	3889.45
Traes_4BL_4B8CA74B8.2	TraesCS4B02G257200.1	0.7603	helix-loop-helix DNA-binding domain containing protein	3883.37
Traes_2AL_45E6314EF.1	TraesCS2A02G415300.1	0.7962	Transcription factor	3882.53
Traes_6DL_18E00F8E4.1	TraesCS6D02G221700.1	0.8205	B-box zinc finger	3882.48
Traes_1BS_CE38938A8.1	TraesCS1B02G080600.1	1	Lateral organ boundaries (LOB) domain	3881.11
Traes_1DS_5BAD8947E.1	TraesCS1D02G084400.1	0.9297	Myb-like DNA-binding domain	3880.84
TRAES3BF043700070CFD_	TraesCS1D02G319500.1	1		3878.66
Traes_7BS_3FD792335.1	TraesCS7B02G065800.1	0.8809	Auxin response factors (ARFs) are transcriptional factors that bind specifically to the DNA sequence 5'-TGTCTC-3' found in the auxin-responsive promoter elements (AuxREs)	3878.31
TRAES3BF111600160CFD_	TraesCS3B02G404200.1	0.9077		3876.82
Traes_2AL_48B239DD6.1	TraesCS2A02G474000.1	0.8307	Homeobox-leucine zipper protein	3875.41
Traes_4DL_21C202E37.1	TraesCS4A02G138100.1	0.7568	Protein of unknown function, DUF573	3874.44
Traes_4BS_344A932261.	TraesCS4B02G141400.1	0.7324		3873.68
Traes_5BL_50B986FF5.1	TraesCS5B02G402200.1	0.7208	helix loop helix domain	3873.66
Traes_1DS_0CFC1995D.2	TraesCS1D02G105300.1	0.9251	Seed dormancy control(OBF5)	3873.25
TRAES3BF059600070CFD_	TraesCS3B02G109800.1	1		3871.84
Traes_1BL_405FE0DBA.2	TraesCS1B02G451500.1	0.7699	SANT SWI3, ADA2, N-CoR and TFIIIB'' DNA-binding domains	3871.24
Traes_6AL_52227091B.1	TraesCS6A02G318900.1	0.9511	Myb-like DNA-binding domain	3870.47
Traes_1AL_4E924201A.1	TraesCS1A02G197400.1	1	WRKY DNA -binding domain	3870.31
Traes_4DL_D84567626.1	TraesCS4D02G176000.1	0.7988	No apical meristem (NAM) protein	3870.22
Traes_1DS_A31FB6CB2.1	TraesCS2D02G008400.1	0.9628	Lateral organ boundaries (LOB) domain	3869.73
Traes_2BS_BD0ED621D.2	TraesCS2B02G218800.1	0.9788	Homeobox domain	3867.16
Traes_7DS_1948388F8.2	TraesCS7D02G250100.5	0.7771	Auxin response factors (ARFs) are transcriptional factors that bind specifically to the DNA sequence 5'-TGTCTC-3' found in the auxin-responsive promoter elements (AuxREs)	3866.61
Traes_5DL_46D39C394.1	TraesCS5D02G210900.1	0.7509	Myb-like DNA-binding domain	3865.29
Traes_5AL_10E85D5B3.1	TraesCS7A02G014500.1	0.9583	FAR1 DNA-binding domain	3865.16
Traes_7AS_34D476D5D1.	TraesCS7A02G246100.1	1		3865.15
Traes_3DL_13B382BD2.1	TraesCS3D02G403100.1	0.9662	Belongs to the GRAS family	3864.38
Traes_1AL_00A8A2030.2	TraesCS1A02G311900.1	0.7661	Basic region leucine zipper	3864.21
Traes_5DL_B89CD8432.1	TraesCS5D02G332000.1	0.9912	NB-ARC domain	3864.18
Traes_6DL_8D95F127B.1	TraesCS6D02G304300.1	0.8884	in StAR and phosphatidylcholine transfer protein	3863.54
Traes_1BL_8D7875F34.1	TraesCS1A02G445600.1	0.8543	Zinc finger C-x8-C-x5-C-x3-H type (and similar)	3863.22
Traes_7DS_3673F1C73.4	TraesCS7D02G244600.1	0.9658	Ethylene insensitive 3	3860.76
Traes_4DS_A5CD70F30.3	TraesCS4D02G136400.1	1	Belongs to the GRAS family	3860.68
Traes_6AS_57E50EE92.3	TraesCS6B02G186700.1	0.7123	RNA polymerase II regulatory region DNA binding	3860.09
Traes_2BS_015167E00.1	TraesCS2B02G228000.1	0.8486	Belongs to the GRAS family	3859.04
Traes_4BS_DCA6E2BE0.2	TraesCS4B02G054000.1	0.856	Belongs to the GRAS family	3858.33
Traes_6DL_359607E93.1	TraesCS6D02G240600.1	0.702	B3 DNA binding domain	3858.18
Traes_3AS_965E2F790.1	TraesCS3A02G109300.1	0.7159	Myb-like DNA-binding domain	3857.94
Traes_6AL_C0A2B4F041.	TraesCS6A02G224400.1	0.729		3857.09
TRAES3BF071100100CFD_	TraesCS3B02G425200.1	0.7228		3856.8
TRAES3BF008800180CFD_	TraesCS3B02G210300.1	0.9536		3855.65
Traes_5BL_4CA71C036.1	TraesCS5B02G396700.1	1	MADS-box transcription factor 34	3854.68
Traes_4BS_34AF89ACE.1	TraesCS4B02G056600.1	0.8171	helix loop helix domain	3853.38
Traes_6BS_44456AE22.1	TraesCS6B02G138200.2	0.7046	Myb-like DNA-binding domain	3853.27
Traes_5DL_11A35E16D.1	TraesCS5D02G355900.1	0.9755	transcription, DNA-templated	3852.98
TRAES3BF063400070CFD_	TraesCS3B02G271900.1	0.9396		3852.97
Traes_4DL_A13AE4BE6.2	TraesCS4D02G345300.1	0.7833	No apical meristem (NAM) protein	3850.54
TRAES3BF111700070CFD_	TraesCS3B02G278000.1	0.9867		3849.69
Traes_1BS_403DBC53C.1	TraesCS1B02G147800.2	0.9705	Myb-like DNA-binding domain	3849.11
TRAES3BF073700060CFD_	TraesCS3B02G158800.1	0.963		3848.52
Traes_5BL_A85CEE3C1.1	TraesCS5B02G301900.1	0.8329	basic region leucin zipper	3847.63
Traes_4BL_F1FE29573.2	TraesCS4B02G315600.1	0.9451	zinc finger	3846.68
Traes_4AL_99A941299.1	TraesCS4A02G405800.1	0.962	Homeobox associated leucine zipper	3846.35
Traes_5AS_3A85F1C2C.3	TraesCS5A02G115300.2	0.9923	transcription factor	3845.63
Traes_5AS_4125EE078.2	TraesCS5A02G054200.1	0.7115	Tesmin/TSO1-like CXC domain	3843.54
Traes_2BS_5DF7F4FEE.1	TraesCS2B02G212400.1	0.9494	Lateral organ boundaries (LOB) domain	3842.26
Traes_3AL_386795528.1	TraesCS3A02G359200.1	0.7457	Myb-like DNA-binding domain(MYB3R-5)	3842.03
Traes_5BL_3A9D3CEEF.2	TraesCS5B02G490600.1	1	C2H2-type zinc finger	3839.73
Traes_5BL_60510E4A7.1	TraesCS5B02G311900.1	1	DNA-binding domain in plant proteins such as APETALA2 and EREBPs	3838.83
Traes_5DL_E96693018.1	TraesCS5A02G251390.2	0.9702	Helix-loop-helix DNA-binding domain	3837.93
TRAES3BF003800040CFD_	TraesCS3B02G198700.1	0.7551		3836.55
TRAES3BF095600020CFD_	TraesCS3B02G447100.1	0.9083		3836.48
Traes_5AL_1FB74A6E1.3	TraesCS5A02G375400.1	0.7153	single-stranded telomeric DNA binding	3836.33
Traes_4BS_5156DD076.2	TraesCS4B02G025500.1	0.7667	domain associated with HOX domains	3834.53
Traes_7AL_19F222799.2	TraesCS7A02G299400.3	0.7035	Protein LHY-like isoform X1(CCA1)	3833.64
Traes_5DL_26F3B188A.2	TraesCS5D02G223700.1	0.7571	DNA-binding domain in plant proteins such as APETALA2 and EREBPs	3832.69
Traes_4DL_FD6DBA41D.2	TraesCS4D02G309700.1	1	Myb-like DNA-binding domain	3832.21
Traes_4DS_009CBDD14.1	TraesCS4D02G062100.1	0.8671	Associated with HOX	3831.52
Traes_4AL_286F71214.1	TraesCS4A02G363200.1	0.8354		3831.1
Traes_2BS_CC6686C54.1	TraesCS2B02G237300.1	1	helix loop helix domain	3830.47
TRAES3BF070600040CFD_	TraesCS3B02G109000.1	0.7726		3829.92
Traes_6DL_6DC75B590.1	TraesCS6A02G229500.1	0.9501	DNA-binding domain in plant proteins such as APETALA2 and EREBPs	3829.71
Traes_5DL_46A3B0DAB1.	TraesCS5D02G213400.1	0.9891		3829.55
Traes_2BL_859E9B1DA.2	TraesCS2B02G436100.1	0.935	DNA-binding domain in plant proteins such as APETALA2 and EREBPs(ERF5)	3828.64
Traes_5BL_8BE382FE3.2	TraesCS5B02G356000.1	0.9309	No apical meristem (NAM) protein	3828.05
Traes_6AS_94B61ADF8.1	TraesCS6A02G143900.1	0.9533	B-Box-type zinc finger	3827.84
Traes_5BL_A5532B750.1	TraesCS5B02G122000.2	0.9948	transcription factor	3827.43
Traes_5BS_A5532B750.1	TraesCS5B02G122000.2	0.9948	transcription factor	3827.43
Traes_4AL_6566FA47B.1	TraesCS4A02G306400.1	0.9404	Histone-like transcription factor (CBF/NF-Y) and archaeal histone	3826.36
Traes_6BL_A964BE52B.1	TraesCS6B02G303600.1	0.9579	transcription factor	3825.68
Traes_3B_FA3CD3CB6.1	TraesCS3B02G487800.1	1		3824.77
Traes_1BS_B44ECE28C.1	TraesCS1B02G055200.1	1	Myb-like DNA-binding domain	3819.27
Traes_2AS_C73DE621D.1	TraesCS2D02G061600.1	0.713	No apical meristem (NAM) protein	3818.68
Traes_4AS_4EFBA88E4.1	TraesCS4A02G113000.1	0.7508	Myb-like DNA-binding domain	3817.85
Traes_5BL_7F56360BF.1	TraesCS5B02G406000.1	0.8516	C2H2-type zinc finger	3817.18
Traes_6BS_BD894AD26.1	TraesCS6B02G167100.1	0.8359	Auxin response factors (ARFs) are transcriptional factors that bind specifically to the DNA sequence 5'-TGTCTC-3' found in the auxin-responsive promoter elements (AuxREs)(ARF6)	3816.37
Traes_3DL_2C29058E6.1	TraesCS3A02G249100.2	0.9036	B3 DNA binding domain	3815.63
Traes_3AS_5A6A80EA5.1	TraesCS3A02G139000.1	0.8213	BES1/BZR1 plant transcription factor, N-terminal	3814.86
Traes_6DS_17B737547.1	TraesCS6D02G110600.1	1	homeobox-leucine zipper protein HOX26	3814.82
Traes_6DL_FCDEB9A8B.1	TraesCS6D02G210900.1	0.728	Myb-related protein Myb4	3812.64
Traes_2AL_246006E77.1	TraesCS2A02G291700.1	0.8109	Alcohol dehydrogenase transcription factor Myb/SANT-like	3812.38
Traes_5BL_4D4B8A841.1	TraesCS7A02G014500.1	1	FAR1 DNA-binding domain	3812.03
Traes_7AS_B71C74E86.1	TraesCS7A02G087900.1	0.9828	B3 domain-containing protein	3811.57
Traes_5BL_7F84602F3.1	TraesCS5B02G214400.1	0.762	DNA-binding domain in plant proteins such as APETALA2 and EREBPs	3811.37
TRAES3BF153400010CFD_	TraesCS3B02G600800.4	0.9775		3811.22
Traes_2DS_F6FBC974C.2	TraesCS2D02G190500.1	0.9571	DNA binding domain(WRKY4)	3810.43
Traes_7BL_0712EF0CA.2	TraesCS7B02G186900.1	0.9842	DNA-binding domain in plant proteins such as APETALA2 and EREBPs	3808.98
Traes_2DL_61C443C56.1	TraesCS2D02G305300.1	0.797	No apical meristem (NAM) protein	3805.06
Traes_4DL_29A136781.2	TraesCS4D02G237100.2	1	helix loop helix domain	3804.93
Traes_5BL_3C4ECAB6D.1	TraesCS5B02G556300.1	0.7482	Myb-like DNA-binding domain	3804.47
Traes_4AS_DD5072A70.1	TraesCS4A02G060200.1	0.7426	helix loop helix domain	3804.34
Traes_4AS_2BDA1260C.3	TraesCS4D02G177000.1	0.8373	Ethylene insensitive 3(EIL1)	3802.92
Traes_2BL_88BBF0441.1	TraesCS2B02G467800.1	0.8268	Myb-like DNA-binding domain	3801.33
Traes_1DL_8398893D8.1	TraesCS1B02G232800.1	0.843	SANT SWI3, ADA2, N-CoR and TFIIIB'' DNA-binding domains	3800.91
Traes_4DL_C2F35966E.2	TraesCS4D02G304500.3	1	ankyrin repeats	3800.3
TRAES3BF091600190CFD_	TraesCS1B02G223400.1	0.847		3799.03
Traes_4DS_30D830CD9.1	TraesCS4D02G017200.2	1	Myb/SANT-like DNA-binding domain	3798.93
Traes_2AS_3DDBFDD8D.1	TraesCS6A02G118800.2	0.8902	GATA zinc finger	3798.86
Traes_7BL_1AC36A6FD.1	TraesCS7B02G242300.1	0.9526	Tesmin/TSO1-like CXC domain	3792.66
Traes_5BL_7F0FD1538.2	TraesCS5B02G344200.1	0.9786	NB-ARC domain	3792.6
TRAES3BF008500030CFD_	TraesCS3B02G106900.1	0.7057		3792.32
Traes_2BL_A69F6C5DF.1	TraesCS2B02G280300.1	0.7111	DNA binding domain	3792.3
TRAES3BF022100010CFD_	TraesCS3B02G272200.1	0.9553		3792.16
Traes_4DL_DFCF4A15A.1	TraesCS4D02G192400.1	0.7789	Myb-like DNA-binding domain	3789.32
Traes_2BS_8A1FE01EE.1	TraesCS2B02G117900.1	0.7022	Homeobox domain	3789.07
Traes_2BL_0BA3C9692.1	TraesCS2B02G616900.1	0.9951	No apical meristem (NAM) protein	3787.04
Traes_4AS_18663793B.1	TraesCS4A02G088400.1	1	DNA-binding domain in plant proteins such as APETALA2 and EREBPs	3786.78
Traes_1AL_3B659AABA.1	TraesCS1A02G276600.3	0.9751	Seed dormancy control	3786.69
Traes_2AS_4EFA77404.2	TraesCS2A02G116100.1	0.8135	Myb-like DNA-binding domain(NIGT1)	3786.05
Traes_5BS_88AF62B60.2	TraesCS5B02G018600.1	0.929	GATA zinc finger	3785.07
Traes_6BL_2801119FA.2	TraesCS6B02G372100.1	0.996	Zinc finger CCCH domain-containing protein	3785.06
Traes_7DS_A4CA05A36.1	TraesCS7D02G213500.1	1	helix loop helix domain	3784.69
Traes_2AL_C00552444.1	TraesCS2A02G401200.1	0.9949	lipid binding	3783.67
Traes_3AL_1D19F288D.1	TraesCS3A02G249100.2	0.9076	B3 DNA binding domain	3783.53
Traes_4AS_491EF4D7F.1	TraesCS4A02G036000.1	0.8273	Transcription factor DP	3782.9
TRAES3BF111600130CFD_	TraesCS3B02G404300.1	0.9156		3781.88
Traes_5BL_CBFAD4B59.1	TraesCS5B02G478000.1	0.8566	helix loop helix domain	3781.59
Traes_5DS_44A8E7C76.1	TraesCS5D02G065500.1	0.7232	Tesmin/TSO1-like CXC domain	3781.49
Traes_2BL_D3FAA4D64.2	TraesCS2B02G463800.1	0.9678	Helix-loop-helix DNA-binding domain	3778.68
Traes_6BL_5D8EE6802.1	TraesCS6B02G424600.1	1	MYB-CC type transfactor, LHEQLE motif	3778.37
TRAES3BF073700090CFD_	TraesCS3B02G159100.1	0.9845		3776.76
Traes_5AL_2F93FD88F.2	TraesCS5A02G153000.1	0.9058	Myb-like DNA-binding domain	3776.28
Traes_4BL_03B8EA3BF.1	TraesCS4B02G320300.1	0.5455	No apical meristem (NAM) protein	3775.84
Traes_6DL_9097A97D9.1	TraesCS7A02G014500.1	0.8131	Protein FAR1-RELATED SEQUENCE	3775.32
Traes_6AL_BF34EBCFA.2	TraesCS6A02G286400.2	0.9219	Zinc finger protein(COL9)	3774.92
Traes_5DL_96F9EED93.2	TraesCS5D02G323100.2	0.988	Homeobox domain	3773.27
Traes_7DL_E1D7A51C8.1	TraesCS7B02G277800.1	0.8186	AP2 domain	3772.56
Traes_4DL_19DC0CA31.1	TraesCS4D02G171700.2	0.9397	Transcription factor RF2b	3771.82
Traes_7DS_6418D89A3.1	TraesCS7D02G196300.1	0.7109	Protein CUP-SHAPED COTYLEDON 2	3771.43
Traes_6AL_A5FB7CFA5.1	TraesCS6A02G267500.1	0.9854	DNA binding domain(WRKY14)	3770.89
Traes_5BL_59AFA4B01.1	TraesCS5A02G245900.1	0.8383	(NAC) domain-containing protein	3768.49
Traes_5BL_9C32B27E2.1	TraesCS5B02G317400.1	0.9799	Homeobox domain	3767.99
Traes_1DL_B26A733D4.1	TraesCS1D02G283100.1	0.7321	Myb-like DNA-binding domain(MYB3R-5)	3766.98
Traes_2BL_CBFB7D720.2	TraesCS2B02G627100.1	1	NAC domain-containing protein 7	3766.51
Traes_4DL_05F87867C.1	TraesCS4D02G312700.1	0.9947	Lateral organ boundaries (LOB) domain	3766.19
Traes_2BL_E58521BDF.1	TraesCS2B02G469800.1	0.9077	helix loop helix domain	3765.74
Traes_4DS_2E95B3A30.2	TraesCS4D02G026100.1	0.7681	Tesmin/TSO1-like CXC domain	3765.43
Traes_4BL_0F02B2343.1	TraesCS4B02G345600.1	0.7522	domain associated with HOX domains	3765.38
Traes_6BS_B2C9F123A.1	TraesCS6A02G037700.1	0.7305	SANT SWI3, ADA2, N-CoR and TFIIIB'' DNA-binding domains	3765.03
Traes_2DS_20F748657.2	TraesCS2D02G199200.1	1	Homeobox domain	3764.28
Traes_2BS_B65714572.1	TraesCS2B02G187500.1	1	WRKY DNA -binding domain(WRKY30)	3763.42
Traes_4DL_DC6A55EEE.2	TraesCSU02G029700.1	0.9981	Myb/SANT-like DNA-binding domain	3761.64
Traes_6DL_7B2EC9B84.1	TraesCS6D02G299000.1	0.9947	DNA-binding domain in plant proteins such as APETALA2 and EREBPs	3761.51
Traes_7BS_A0A8B25DF.1	TraesCS7B02G195800.1	1	helix loop helix domain	3761.16
Traes_5BL_C08428870.1	TraesCS5B02G265300.1	0.9809	Seed dormancy control	3761.12
TRAES3BF046300070CFD_	TraesCS3B02G326500.3	0.7232		3760.64
Traes_1AS_3232D5589.1	TraesCS1A02G044900.1	0.7143	MADS	3759.28
Traes_4BS_180379032.1	TraesCS4B02G001900.1	0.5593	AP2 domain	3759.16
Traes_5BL_DA72CE20D.2	TraesCS5B02G245900.1	0.8947	helix loop helix domain	3759.01
Traes_2AS_FA7059723.1	TraesCS2A02G206400.1	0.8147	SANT SWI3, ADA2, N-CoR and TFIIIB'' DNA-binding domains	3758.82
Traes_2BS_D007D6598.1	TraesCS2B02G217500.1	1	Belongs to the GRAS family	3758.26
Traes_5DS_6E33F5034.1	TraesCS5D02G068800.1	0.9463	Basic leucine-zipper C terminal	3757.43
Traes_5AL_7ED9D05C5.1	TraesCS5A02G143200.1	0.9713	No apical meristem (NAM) protein(NAP)	3756.76
Traes_6AL_BB730675A.1	TraesCS6A02G224200.1	0.7195	Myb-related protein Myb4	3756.23
Traes_2BL_CF47A74CC.2	TraesCS2B02G436300.1	0.7527	DNA-binding domain in plant proteins such as APETALA2 and EREBPs(ERF-1)	3755.09
Traes_6AL_C32B016191.	TraesCS6D02G309500.3	0.8528		3754.49
Traes_6AL_C32B01619.1	TraesCS6D02G309500.3	0.8528	Myb DNA-binding like	3754.49
Traes_2AL_39432DCB1.2	TraesCS2A02G404500.1	0.944	RWP-RK domain	3752.39
Traes_6AL_3C182DED5.1	TraesCS6B02G427100.1	0.7226	Ethylene-responsive transcription factor 1	3751.18
Traes_2BL_209C14A8F.1	TraesCS2B02G328300.1	0.8934	No apical meristem (NAM) protein	3750.54
Traes_4BL_F7A02A7FD.1	TraesCS4B02G268800.1	0.8273	Transcription factor DP	3750.39
Traes_2BL_4E0157603.2	TraesCS2B02G355500.1	0.915	No apical meristem (NAM) protein	3750.36
Traes_1DS_F70AAB507.2	TraesCS1D02G045500.1	0.9259	K-box region	3750.17
Traes_4AL_98EA87DFA1.	TraesCS4A02G452600.1	0.7865		3750.13
TRAES3BF008600030CFD_	TraesCS3B02G106900.1	0.7092		3749.82
Traes_5AL_4C72C5BCB.1	TraesCS5A02G414000.1	0.8186	Belongs to the GRAS family(PAT1)	3749.54
Traes_4AL_3BA1D51E2.1	TraesCS4A02G415300.1	0.9891	Lateral organ boundaries (LOB) domain	3748.65
Traes_6AL_D6BA531C1.1	TraesCS6A02G239300.1	0.8112	B-box zinc finger	3747.72
Traes_6AL_D6BA531C11.	TraesCS6A02G239300.1	0.8112		3747.72
Traes_5DL_895AA6D35.1	TraesCS5B02G235600.2	0.7297	basic region leucin zipper(ABF1)	3747.33
Traes_2DS_B05DDA181.2	TraesCS2D02G221200.1	0.8168	helix loop helix domain	3745.56
Traes_4BS_BA032E4A1.1	TraesCS4B02G019200.1	1	Myb/SANT-like DNA-binding domain	3745.51
Traes_6DL_DB1546316.1	TraesCS6D02G248300.1	1	Myb-like DNA-binding domain	3744.26
Traes_2DS_6BAF1825F.1	TraesCS2D02G156800.1	0.8077	Protein of unknown function, DUF573	3744.04
Traes_5DS_50846FD0C.1	TraesCS5D02G052300.1	0.8838	MEKHLA domain	3743.48
Traes_2BS_5DAE613CE.1	TraesCS2B02G227500.1	0.8558	Zinc finger C-x8-C-x5-C-x3-H type (and similar)	3743.46
Traes_5AL_F8DEBE8E7.1	TraesCS5A02G141700.1	0.7295	DNA-binding domain in plant proteins such as APETALA2 and EREBPs(WRI1)	3743.03
Traes_2BL_2BA3A755A.1	TraesCS2B02G351600.1	0.7227	DNA binding domain(WRKY34)	3741.94
Traes_5BL_A28533902.1	TraesCS5B02G176200.1	0.8063	MYB-CC type transfactor, LHEQLE motif	3741.84
Traes_5DL_1521D205A.1	TraesCS5D02G415800.1	0.8296	Myb-like DNA-binding domain	3741.47
TRAES3BF093600190CFD_	TraesCS3B02G274700.1	0.9679		3741.41
Traes_5BL_CC18CAD72.1	TraesCS5B02G142100.1	1	No apical meristem (NAM) protein(NAP)	3740.94
Traes_2BS_84FB90D88.1	TraesCS2B02G115700.1	1	basic region leucin zipper(AREB3)	3740.59
Traes_6DL_88DFCF552.1	TraesCS6D02G387900.1	0.7591	C2H2-type zinc finger	3739.65
Traes_5DS_A71D29AE1.1	TraesCS5D02G045700.1	0.7975	Auxin response factors (ARFs) are transcriptional factors that bind specifically to the DNA sequence 5'-TGTCTC-3' found in the auxin-responsive promoter elements (AuxREs)(ARF6)	3739.34
Traes_4DS_4BD85B5C7.2	TraesCS4D02G022600.1	0.7667	domain associated with HOX domains	3738.79
TRAES3BF047700010CFD_	TraesCS3B02G236900.1	0.9791		3738.7
Traes_7BL_66296695F.1	TraesCS7B02G363100.1	0.8931	Auxin response factors (ARFs) are transcriptional factors that bind specifically to the DNA sequence 5'-TGTCTC-3' found in the auxin-responsive promoter elements (AuxREs)(ARF6)	3738.57
Traes_5DL_EB47672ED.4	TraesCS5D02G183100.1	0.7527	MYB-CC type transfactor, LHEQLE motif	3737.12
Traes_5BL_5299B6B33.1	TraesCS5B02G312300.1	0.7548	DNA-binding domain in plant proteins such as APETALA2 and EREBPs	3732.97
Traes_2AS_C0C74B775.1	TraesCS2A02G212200.1	0.9866	helix loop helix domain	3732.29
Traes_4AL_00DB56D41.4	TraesCS4A02G289400.1	0.7635	domain associated with HOX domains	3731.86
Traes_6DL_EF6D5D4FA.1	TraesCS6D02G254200.1	0.7964	Dof domain, zinc finger	3731.7
Traes_4DL_8156B39DF.1	TraesCS4D02G289600.1	0.9793	CCAAT-Binding transcription Factor	3731.06
Traes_3DL_D82CA7827.1	TraesCS3D02G384500.2	0.8131	Transcriptional activator that binds specific DNA sequence	3730.79
Traes_6BL_EEAA2A7E3.1	TraesCS6B02G294900.1	0.8828	DNA binding domain(WRKY14)	3729.14
Traes_1AL_C7FD90C13.2	TraesCS1A02G366100.1	0.9056	Myb-related protein Hv33	3729.13
Traes_3AS_348CA06D5.2	TraesCS3A02G112300.2	0.9972	flower development	3728.58
Traes_1DS_5EEED86AD.2	TraesCS1D02G125400.1	0.9815	Myb-like DNA-binding domain	3728.29
Traes_6AL_477C798AB.1	TraesCS6A02G287400.1	0.9693	Histone-like transcription factor (CBF/NF-Y) and archaeal histone	3727.67
Traes_1AL_343F2D219.1	TraesCS1A02G365900.1	0.8988	Myb-related protein Hv33	3727.37
Traes_4BL_80683C0B9.1	TraesCS4B02G184500.1	0.8634	basic region leucin zipper	3727.35
Traes_2AS_0186B9E4F.2	TraesCS2A02G182700.2	1	DNA binding domain(WRKY4)	3726.59
Traes_7DL_77A6A7FBF.2	TraesCS7A02G511800.2	0.8664	regulation of nucleic acid-templated transcription	3726.08
Traes_2DS_3F5D36630.1	TraesCS2D02G068000.1	0.9598	Myb-like DNA-binding domain	3724.99
Traes_2BL_B2811EA531.	TraesCS2B02G320700.1	0.9918		3724.8
Traes_4DL_AE039EE10.1	TraesCS4D02G268100.2	0.8968	Transcription factor DP	3724.35
Traes_4DS_4BC902279.1	TraesCS4D02G134800.1	1	zinc finger	3723.69
Traes_7AL_07431A665.2	TraesCS7A02G511800.2	0.956	regulation of nucleic acid-templated transcription	3722.94
Traes_5AS_A86138871.1	TraesCS5A02G038300.1	0.8032	Auxin response factors (ARFs) are transcriptional factors that bind specifically to the DNA sequence 5'-TGTCTC-3' found in the auxin-responsive promoter elements (AuxREs)(ARF6)	3722.02
Traes_1BL_04EFBAECF.2	TraesCS1B02G235700.1	0.7778	Lateral organ boundaries (LOB) domain	3721.98
Traes_5AL_538EC4C86.1	TraesCS5A02G124600.1	0.9699	Basic region leucine zipper	3721.61
Traes_6AL_CE4E76E1A.1	TraesCS6A02G306300.1	0.9677	DNA-binding domain in plant proteins such as APETALA2 and EREBPs	3721.11
Traes_5DL_0924913F8.1	TraesCS5D02G421100.1	0.7583	No apical meristem (NAM) protein	3720.88
Traes_5AL_331CE753D.1	TraesCS5A02G533200.1	0.9833	Transcription factor	3720.43
Traes_5AL_0C11447DF.2	TraesCS5A02G174200.1	0.7246	Seed dormancy control	3720.34
Traes_4AL_9BF07972C.2	TraesCS4A02G459200.1	0.7337	Myb-like DNA-binding domain	3719.6
Traes_5BS_210B7C3A4.2	TraesCS5B02G006400.1	0.8758	Associated with HOX	3719.42
Traes_4DL_5BB7F31ED.1	TraesCS4D02G279300.1	0.788	domain associated with HOX domains	3719.33
Traes_6AS_2F376689A.2	TraesCS6A02G155400.3	0.8279	MYB-CC type transfactor, LHEQLE motif	3718.67
Traes_5AL_D9A4DFF71.1	TraesCS5A02G179000.1	0.9351	Basic region leucine zipper(bZIP)	3718.46
Traes_7DL_D97D4666A.1	TraesCS7D02G462200.1	0.9265	Nuclear transcription factor Y subunit	3718.14
Traes_4DL_D73F1E523.1	TraesCSU02G148500.1	1	zinc finger	3718.04
Traes_2AL_D6F52AD28.2	TraesCS2B02G592700.1	0.7516	Dof domain, zinc finger	3717.71
Traes_5AS_B2606FAD3.1	TraesCS5A02G007800.1	0.8804	Associated with HOX	3717.61
Traes_1DS_FE10585EC.2	TraesCS1D02G036700.2	0.9863	Dof domain, zinc finger	3715.89
Traes_6AL_AA5E171CD.1	TraesCS6A02G340600.1	1	Zinc finger CCCH domain-containing protein	3715.33
Traes_5DL_67A38E9B7.1	TraesCS5D02G183500.1	0.9481	Basic region leucine zipper(bZIP)	3714.67
Traes_4DS_7F3D9E4D9.2	TraesCS4D02G056900.1	0.9702	helix loop helix domain	3713.07
Traes_2BL_921BF570C.1	TraesCS2B02G268200.1	0.8843	sequence-specific DNA binding	3712.61
Traes_5DS_8E2AF4F8B.1	TraesCS5D02G013300.1	0.8789	Associated with HOX	3711.98
Traes_2DS_49959692B1.	TraesCS2D02G209600.1	0.8276		3711.78
Traes_2DS_49959692B.1	TraesCS2D02G209600.1	0.8276	SANT SWI3, ADA2, N-CoR and TFIIIB'' DNA-binding domains	3711.78
Traes_2AL_7E3EE8C87.2	TraesCS2A02G505600.1	0.829	DNA-binding domain in plant proteins such as APETALA2 and EREBPs	3711.03
Traes_4DL_FB8B5AAEB.2	TraesCS4A02G088400.1	1	DNA-binding domain in plant proteins such as APETALA2 and EREBPs	3710.9
Traes_2AL_158F8EE88.2	TraesCS2A02G417300.1	1	DNA-binding domain in plant proteins such as APETALA2 and EREBPs(ERF-1)	3710.04
Traes_5DL_8F7AC72B0.2	TraesCS5D02G385300.1	0.8653	MEKHLA domain	3709.11
Traes_7DS_7375BED72.2	TraesCS7D02G161900.1	0.8835	Auxin response factors (ARFs) are transcriptional factors that bind specifically to the DNA sequence 5'-TGTCTC-3' found in the auxin-responsive promoter elements (AuxREs)	3708.57
Traes_5BL_96FDFC152.1	TraesCS5B02G286000.1	0.7865	Squamosa promoter-binding-like protein	3708.07
Traes_3DL_19DD13245.1	TraesCS7A02G014500.1	0.764	FAR1 DNA-binding domain	3707.83
TRAES3BF056900070CFD_	TraesCS3B02G144100.1	0.7516		3707.8
Traes_5DL_156E53683.1	TraesCS5D02G183000.1	0.8024	MYB-CC type transfactor, LHEQLE motif	3707.45
Traes_2DS_3569AEDFB.1	TraesCS2D02G158200.1	0.7707	Myb-like DNA-binding domain	3706.82
Traes_1AL_51EBF8930.1	TraesCS1A02G284000.1	0.7273	Myb-like DNA-binding domain(MYB3R-5)	3705.42
Traes_7AS_8123257BA.1	TraesCS7A02G111700.2	0.9	MADS-box transcription factor 25	3705.12
Traes_5BL_DB6E9FDB9.2	TraesCS5B02G163500.1	0.7622	Zinc finger protein	3704.71
Traes_4BL_ECD20BE67.1	TraesCS4B02G305300.1	0.9968	Homeobox associated leucine zipper	3704.34
Traes_2AS_C4FD8E351.2	TraesCS2A02G204300.2	0.7704	CW-type Zinc Finger	3703.88
Traes_4BL_DAFEC95DD.1	TraesCS4B02G178600.1	0.8982	Seed dormancy control(OBF5)	3703.86
Traes_6BL_D00F04562.1	TraesCS6B02G416400.1	1	No apical meristem (NAM) protein	3703.64
Traes_2AL_6FC5F1FD0.1	TraesCS2A02G442700.1	0.8009	Helix-loop-helix DNA-binding domain	3703
Traes_3DS_D79D35637.1	TraesCS3D02G078300.1	0.9574	helix loop helix domain	3702.89
Traes_4AS_E20BDE652.1	TraesCS4A02G097800.1	0.725	Dof domain, zinc finger	3702.16
Traes_2DS_DADB69BC9.1	TraesCS2D02G195100.1	0.9907	DNA binding	3701.74
TRAES3BF071100040CFD_	TraesCS3B02G424600.1	1		3701.45
Traes_5AS_D238844BB.1	TraesCS5A02G101000.1	0.9364	Myb-like DNA-binding domain	3699.5
Traes_2BS_8A40B568C.1	TraesCS2B02G095900.1	1	Transcription factor	3697.51
Traes_4DL_9477862E8.2	TraesCS4D02G235900.1	0.9655	helix loop helix domain	3696.26
Traes_6BL_972224088.1	TraesCS6B02G277400.1	0.7852	Belongs to the GRAS family	3695.36
TRAES3BF021600260CFD_	TraesCS3B02G599700.1	0.7189		3695.02
Traes_4DS_258687ACC.1	TraesCS4D02G136000.1	0.9985	Belongs to the GRAS family	3694.69
TRAES3BF018800030CFD_	TraesCS3B02G399300.1	0.7964		3694.59
TRAES3BF014900010CFD_	TraesCS3B02G164500.1	0.8539		3694.57
Traes_6AL_C640DBC9E.2	TraesCS6A02G282000.2	0.9638	zinc finger	3694.32
Traes_4DS_9C2FD9F381.	TraesCS4D02G090500.1	0.9922		3693.69
Traes_4DL_58F3F93CA.1	TraesCS4D02G299700.1	0.7991	B3 DNA binding domain	3693.09
Traes_5DL_F38B6F5C2.1	TraesCS5D02G372900.2	1	B3 DNA binding domain	3692.69
Traes_2AL_0A21FB42C.1	TraesCS2A02G415400.1	0.7236	Myb-like DNA-binding domain	3691.64
Traes_2DL_7B1FE2F5B.1	TraesCS2D02G488500.1	0.9221	MYB-CC type transfactor, LHEQLE motif	3691.38
Traes_6AL_9C9D677D4.1	TraesCS6A02G359200.1	0.762	Transcriptional activator that binds specific DNA sequence	3691.09
TRAES3BF041800040CFD_	TraesCS3D02G347000.1	0.8758		3690.17
TRAES3BF130100030CFD_	TraesCS3B02G120200.1	1		3689.79
Traes_6DL_499F64524.1	TraesCS6D02G298100.1	0.9602	Myb-like DNA-binding domain	3689.76
Traes_5AL_521868848.2	TraesCS5A02G141500.1	1	basic region leucin zipper(AREB3)	3689.11
Traes_7DS_68E3ACF8E.1	TraesCS7D02G158300.1	0.7384	helix loop helix domain	3687.83
Traes_7DL_B26E341BE.2	TraesCS7D02G470000.1	0.7177	MYB-CC type transfactor, LHEQLE motif	3687.3
TRAES3BF065400200CFD_	TraesCS3B02G610700.1	1		3685.61
Traes_6AL_6FF2ED257.1	TraesCS6A02G213000.1	0.9524	B3 DNA binding domain	3685.41
Traes_1DL_D5BBCA2D0.1	TraesCS1D02G203400.1	0.7722	transcription regulatory region sequence-specific DNA binding	3684.95
Traes_1AS_412B31FC1.1	TraesCS1A02G096300.1	0.997	Seed dormancy control(OBF5)	3684.82
Traes_4AL_8DBE120BC.2	TraesCS4A02G169000.1	0.8575	MADS	3681.3
Traes_6AL_DAA2D7F8A.1	TraesCS6A02G343300.1	0.7634	Ethylene-responsive transcription factor 1	3680.77
Traes_5DL_5C93510D5.1	TraesCS5D02G190800.1	0.9886	WRKY transcription factor(WRKY30)	3680.31
Traes_4BL_87A0339AD.2	TraesCS4B02G301400.1	0.7965	B3 DNA binding domain	3677.95
Traes_5DL_51643AC9F.1	TraesCS5B02G262400.1	0.7238	Protein TRANSPARENT TESTA	3675.38
Traes_7BS_17C8D2707.1	TraesCS7B02G049000.1	0.8093	Transcriptional activator that binds specific DNA sequence	3673.66
Traes_2AL_CFCC2012F.1	TraesCS2B02G589700.1	0.7214	SANT SWI3, ADA2, N-CoR and TFIIIB'' DNA-binding domains	3673.28
Traes_1BL_4D9406708.1	TraesCS1B02G392600.1	0.7315	Myb-like DNA-binding domain	3672.53
Traes_1AL_C527C8688.1	TraesCS1A02G310700.1	0.7849	Histone-like transcription factor (CBF/NF-Y) and archaeal histone	3672.49
Traes_6BS_FE119B025.1	TraesCS6B02G173900.1	0.8689	regulation of nucleic acid-templated transcription	3671.82
Traes_4DL_54E14ABCB.2	TraesCS4D02G316800.1	0.9709	No apical meristem (NAM) protein	3670.92
TRAES3BF021600020CFD_	TraesCS3A02G406500.2	0.8804		3669.69
Traes_3AS_4C4673A12.1	TraesCS3A02G180600.1	0.7253	Dof domain, zinc finger	3669.42
Traes_5DL_C7DA1DA6F.1	TraesCS5D02G420800.1	0.7419	No apical meristem (NAM) protein	3667.76
Traes_4BS_E0FC47132.1	TraesCS4B02G021900.1	0.7757	Homeobox protein knotted-1-like	3666.9
Traes_1BL_80DD53F05.2	TraesCS1D02G329200.1	0.75	Tesmin/TSO1-like CXC domain	3666.5
TRAES3BF099600130CFD_	TraesCS3B02G404600.1	0.8938		3665.4
Traes_5AL_06DC5CDA7.1	TraesCS5A02G473800.1	0.9483	Transcription factor	3663.79
Traes_6AL_3DEF1B023.1	TraesCS6A02G404600.1	0.766	C2H2-type zinc finger	3663.79
TRAES3BF058500060CFD_	TraesCS3B02G270500.1	0.7654		3663.27
Traes_2BL_83EDE2CBB.1	TraesCS2B02G308200.1	0.8096	Alcohol dehydrogenase transcription factor Myb/SANT-like	3662.59
Traes_4BL_BE3E058A6.1	TraesCS4B02G287600.1	0.9112	Homeobox associated leucine zipper	3662.22
Traes_5BS_3F6023CD6.1	TraesCS5B02G039800.1	0.8032	Auxin response factors (ARFs) are transcriptional factors that bind specifically to the DNA sequence 5'-TGTCTC-3' found in the auxin-responsive promoter elements (AuxREs)(ARF6)	3661.66
Traes_2BL_24E6E8DF9.1	TraesCS2B02G403300.1	0.7651	No apical meristem (NAM) protein	3660.03
Traes_2AL_01E6C08C0.2	TraesCS2A02G391700.1	0.7277	GATA zinc finger	3659.86
Traes_3AS_9151583B9.1	TraesCS3A02G026900.1	0.8737	Histone-like transcription factor (CBF/NF-Y) and archaeal histone(NF-YB3)	3659.58
Traes_6BL_D87B09F77.1	TraesCS6B02G276000.1	0.7315	Zinc-finger of C2H2 type	3658.83
Traes_7DS_46E811D74.1	TraesCS7D02G213000.2	0.709	CCT motif(Hd1)	3658.55
TRAES3BF096700030CFD_	TraesCS3B02G138600.1	0.9603		3656.85
Traes_5BL_E86F89671.1	TraesCS5B02G306800.1	1	Helix-loop-helix DNA-binding domain	3656.74
Traes_3AL_7C031019E.1	TraesCS3A02G286600.1	0.75	Myb-like DNA-binding domain	3656.52
Traes_1DS_34596D06E.1	TraesCS1D02G072600.1	0.7368	Myb/SANT-like DNA-binding domain	3656.16
Traes_1AL_309623B48.1	TraesCS1A02G301200.1	0.955	WRKY DNA -binding domain	3654.46
Traes_2AL_962A9D448.1	TraesCS2A02G370300.1	0.7749	Myb-like DNA-binding domain	3654.26
Traes_1DS_4A2001BAC.1	TraesCS1D02G004800.1	1	BED zinc finger	3653.93
Traes_4BS_373BDBA94.1	TraesCS4B02G072400.1	0.7782	No apical meristem (NAM) protein	3653.59
TRAES3BF099900090CFD_	TraesCS3B02G135500.1	1		3653.15
Traes_7AL_D45376F32.2	TraesCS7A02G415800.1	0.7551	MYB-CC type transfactor, LHEQLE motif	3652.04
Traes_6DL_D4F2CDDDC.1	TraesCS6D02G247200.1	1	DNA binding domain(WRKY14)	3651.69
TRAES3BF030600030CFD_	TraesCS3B02G383000.1	0.9481		3651.17
TRAES3BF030500010CFD_	TraesCS3B02G383000.1	0.9481		3651.17
Traes_3B_D6EA106A51.1	TraesCS3B02G383000.1	0.9481	Helix-loop-helix DNA-binding domain	3651.17
Traes_5BL_A847CD732.1	TraesCS5B02G236100.1	0.8466	DNA-binding transcription factor activity	3650.59
Traes_1DL_D9BA83221.2	TraesCS1D02G306000.1	0.7539	basic region leucin zipper(AREB3)	3650.33
Traes_4BL_E20E75836.1	TraesCS4B02G266700.1	0.728	Belongs to the GRAS family(PAT1)	3648.09
TRAES3BF009600010CFD_	TraesCS3B02G353100.1	0.7402		3647.78
Traes_7AL_EFD897AFC.2	TraesCS7A02G357500.1	0.9135	No apical meristem (NAM) protein	3647.69
Traes_1DL_92BCA55C0.2	TraesCS1D02G337400.1	0.9974	Auxin response factors (ARFs) are transcriptional factors that bind specifically to the DNA sequence 5'-TGTCTC-3' found in the auxin-responsive promoter elements (AuxREs)(ETT)	3647.35
Traes_4AS_DBDA5E9C6.1	TraesCS4A02G131000.1	0.7055	No apical meristem (NAM) protein	3645.85
Traes_2AL_F24D031AA.1	TraesCS2A02G288700.1	0.7984	DNA-binding domain in plant proteins such as APETALA2 and EREBPs	3645.3
TRAES3BF019300010CFD_	TraesCS3B02G407600.1	0.7866		3644.15
Traes_2BS_E8D2BD66E.1	TraesCS2B02G112600.1	0.997	Myb-like DNA-binding domain	3644.1
Traes_6DL_DD82BD107.2	TraesCS6D02G324200.1	0.7382	Ethylene-responsive transcription factor 1	3643.96
TRAES3BF020100160CFD_	TraesCS3B02G093300.1	0.9887		3642.11
Traes_2DL_6BD0572DF.1	TraesCS2D02G446000.1	0.7297	Myb-like DNA-binding domain	3641.75
Traes_4AS_7530AAEB4.1	TraesCS4A02G047700.1	0.7834	helix-loop-helix DNA-binding domain containing protein	3640.5
Traes_6DL_865644EC4.2	TraesCS6A02G345400.1	0.9505	SANT SWI3, ADA2, N-CoR and TFIIIB'' DNA-binding domains	3640.33
Traes_2AL_FBC0ED0EE.2	TraesCS2A02G447500.1	0.8469	Myb-like DNA-binding domain	3639.59
Traes_5BS_B2CD001D1.2	TraesCS5B02G059200.1	0.9195	Basic leucine-zipper C terminal	3639.11
Traes_5AL_01329A110.1	TraesCS5A02G391800.1	0.878	K-box region(AP1)	3638.86
TRAES3BF090100100CFD_	TraesCS3B02G393300.1	1		3638.2
Traes_6AS_8E7166D79.1	TraesCS6A02G181400.2	0.8839	AP2 domain	3637.68
Traes_2BL_FC0F8A3DC.1	TraesCS2B02G434100.1	0.7867	AP2 domain	3636.52
Traes_1AS_B282BFB83.1	TraesCS1A02G040200.1	0.734	C2H2-type zinc finger	3636.52
Traes_2BL_970693C1F.1	TraesCS2B02G305500.1	0.9879	DNA-binding domain in plant proteins such as APETALA2 and EREBPs	3635.99
Traes_2DL_C46B73FA3.2	TraesCS2D02G390000.1	0.7202	GATA zinc finger	3635.46
Traes_4DS_9575221BB.3	TraesCS4D02G077600.1	0.7686	Lateral organ boundaries (LOB) domain	3635.15
Traes_4DL_4798D0BBD.1	TraesCS4D02G261600.1	0.7822	Homeobox domain	3634.37
Traes_6DS_086930130.1	TraesCS6A02G143900.1	0.9533	B-Box-type zinc finger	3632.8
Traes_2DS_B1C947D2B.1	TraesCS2A02G105600.1	0.8286	CW-type Zinc Finger(HSI2)	3632.35
Traes_3DL_429583AEC.1	TraesCS3D02G223700.1	0.9096	Myb-like DNA-binding domain(MYB24)	3632.16
Traes_6DL_850266B2A.1	TraesCS6D02G382600.1	0.8081	Lateral organ boundaries (LOB) domain	3631.55
TRAES3BF114300150CFD_	TraesCS3B02G435800.1	0.9979		3631.21
Traes_5DL_53D8DF9CD.1	TraesCS5D02G314400.1	0.7897	DNA-binding domain in plant proteins such as APETALA2 and EREBPs	3628.89
Traes_6DL_136DE13FB.1	TraesCS6D02G285600.1	0.9215	TCP family transcription factor	3628.53
Traes_5AL_E566BD64E.1	TraesCS5A02G396800.1	0.7069	WRKY transcription factor	3627.92
Traes_4DS_F0A04A0EC.1	TraesCS4D02G095700.1	0.951	zinc finger binding to DNA consensus sequence [AT]GATA[AG]	3627.72
Traes_6AS_74635BB63.1	TraesCS6A02G159500.1	0.7429	Belongs to the GRAS family	3627.64
TRAES3BF075600050CFD_	TraesCS3B02G357500.1	0.8213		3627.12
Traes_2AL_8417C5F8B.1	TraesCS2B02G356600.1	0.9421	SANT SWI3, ADA2, N-CoR and TFIIIB'' DNA-binding domains	3626.33
Traes_5BL_DE53199D3.3	TraesCS5B02G235600.2	0.7939	basic region leucin zipper(ABF1)	3626.22
Traes_5DL_9CC4EC839.1	TraesCS5D02G401500.2	0.8423	transcription factor(AP1)	3625.61
Traes_4BS_C74B4B7BA.1	TraesCS4B02G084700.13	0.9988	START domain	3625.22
Traes_4DS_7B0E8D459.2	TraesCS4D02G051600.2	1	Helix-loop-helix DNA-binding domain	3625.06
Traes_6BL_322DA92B5.1	TraesCS6A02G290800.1	0.832	Homeobox associated leucine zipper(hb-1)	3624.26
Traes_4AL_D05736670.1	TraesCS4A02G322200.1	0.7757	Myb-like DNA-binding domain	3623.8
Traes_7AS_458B5662C.1	TraesCS7A02G130700.1	0.9897	SANT SWI3, ADA2, N-CoR and TFIIIB'' DNA-binding domains	3621.68
Traes_5BL_17A712C94.1	TraesCS5B02G257300.1	0.9703	DNA binding domain(WRKY34)	3619.19
Traes_5DL_5FD3B95C7.1	TraesCS5D02G415900.1	0.7614	sequence-specific DNA binding	3617.56
Traes_2DS_61B920833.1	TraesCS2D02G096000.1	0.9726	Myb-like DNA-binding domain	3616.82
Traes_4DS_82065CB2C.1	TraesCS4D02G136200.1	0.9463	Belongs to the GRAS family	3616.56
Traes_6BL_5AA3D02B3.2	TraesCS6B02G411300.1	0.9955	helix loop helix domain	3616.52
Traes_1AL_7BE5906B2.1	TraesCS1A02G218100.1	1	DNA-binding domain in plant proteins such as APETALA2 and EREBPs(ERF5)	3616.38
Traes_2BS_4600D4B54.2	TraesCS2B02G239400.1	0.8615	Belongs to the GRAS family	3615.57
Traes_5BL_A2C97A02D.3	TraesCS5B02G176300.1	0.7455	MYB-CC type transfactor, LHEQLE motif	3615.37
Traes_5DL_1CD39D4D0.1	TraesCS5D02G552200.1	0.7482	Myb-like DNA-binding domain	3614.68
Traes_1BL_DE2CF9613.1	TraesCS1B02G317100.1	0.8056	basic region leucin zipper(AREB3)	3613.46
Traes_4AL_F3571097B.1	TraesCS4A02G257900.1	0.8407	helix loop helix domain	3613.41
TRAES3BF094600010CFD_	TraesCS3B02G447100.1	0.7665		3613.05
Traes_7DL_F53A3F676.1	TraesCS7D02G400000.1	0.763	Domain of unknown function (DUF702)	3612.28
Traes_5AL_F18440729.1	TraesCS5A02G390300.2	0.8865	Transcriptional adapter	3611.52
Traes_5BL_8D23DFA4A.1	TraesCS5B02G440700.1	0.75	heat shock factor	3611.41
Traes_5DL_BFA40F938.1	TraesCS5D02G317800.1	0.7225	DNA-binding transcription factor activity	3609.7
Traes_2AS_28B163E7C.1	TraesCS2A02G100600.1	0.9634	MYB-CC type transfactor, LHEQLE motif	3606.9
Traes_2BL_070D9E2AD.2	TraesCS2B02G289700.1	1	helix loop helix domain	3606.73
Traes_2BL_316A467DE.2	TraesCS2B02G355600.1	1	No apical meristem (NAM) protein	3603.3
Traes_4AS_A7507A8AF.2	TraesCS4A02G003900.1	0.7879	B3 DNA binding domain	3603.1
Traes_1AS_26CB95294.1	TraesCS1A02G062200.1	0.8235	Lateral organ boundaries (LOB) domain	3602.41
Traes_4DS_11C3B0459.1	TraesCS4D02G001700.1	0.9395	Lateral organ boundaries (LOB) domain	3601.33
Traes_2AS_6269D889E.1	TraesCS2A02G161500.1	0.7897	WRKY DNA -binding domain(WRKY30)	3601.15
Traes_5BL_96D5EA4EE.1	TraesCS5B02G265600.2	1	SBP domain(SPL9)	3600.65
Traes_4AL_ECC1C3641.2	TraesCS4A02G283000.1	0.8301	B3 DNA binding domain	3600.44
Traes_3B_934488D20.1	TraesCS3D02G361600.1	0.9062		3600.19
Traes_1AL_206AE5B76.1	TraesCS1A02G420500.1	0.7788	SANT SWI3, ADA2, N-CoR and TFIIIB'' DNA-binding domains	3600.07
Traes_5BL_39FD9626E.5	TraesCS5B02G384500.1	0.9644	helix loop helix domain	3599.91
Traes_1BL_2DCDCD191.2	TraesCS1B02G290200.1	0.7398	domain associated with HOX domains	3598.74
Traes_5AS_178725FAF.2	TraesCS5D02G052200.2	0.7923	Nuclear transcription factor Y subunit A-7	3597.92
Traes_5DL_2A286B481.1	TraesCS5D02G390700.2	0.7464	helix loop helix domain	3597.71
Traes_2DL_9DD224B48.1	TraesCS2D02G441800.1	0.8074	Helix-loop-helix DNA-binding domain	3597.58
Traes_4DL_9A51D1EB2.2	TraesCSU02G127300.1	0.9964	heat shock factor	3597.47
Traes_1AL_DB7593004.2	TraesCS1A02G222300.1	0.8471	Lateral organ boundaries (LOB) domain	3597.31
Traes_2DS_AD8820C42.1	TraesCS2D02G168600.1	0.8783	WRKY DNA -binding domain(WRKY30)	3597.21
Traes_4DS_E6210A614.1	TraesCS4D02G114900.1	0.7785	B3 DNA binding domain	3596.57
Traes_2AL_7ABA7B7C8.1	TraesCS2A02G403200.1	0.8497	Zinc-finger double-stranded RNA-binding	3594.52
Traes_5BL_6E13A3C8C.1	TraesCS5B02G201900.1	0.8507	Myb-like DNA-binding domain	3594.04
Traes_4BS_86704D7461.	TraesCS4B02G003500.1	1		3593.39
Traes_4BS_86704D746.1	TraesCS4B02G003500.1	1	zinc finger	3593.39
Traes_4AL_EE88645E2.1	TraesCS4A02G404700.1	0.7718	Helix-loop-helix DNA-binding domain	3591.98
Traes_1BL_C25B5DDB4.2	TraesCS1B02G293300.1	0.736	Myb-like DNA-binding domain(MYB3R-5)	3591.18
Traes_5BL_AAC9C7238.2	TraesCS5A02G251390.1	0.7581	Helix-loop-helix DNA-binding domain	3591.02
Traes_6AS_1537629B3.1	TraesCS6A02G098800.1	0.7244	heat shock factor	3590.96
Traes_4BL_86941BB78.1	TraesCS4B02G336200.1	0.9891	Belongs to the GRAS family	3589
Traes_4DS_BD48EEAD8.2	TraesCS4D02G110200.1	0.7	Myb/SANT-like DNA-binding domain	3588.77
Traes_7BS_D28CCE3B8.1	TraesCS7B02G020700.1	0.756	Myb-like DNA-binding domain	3588.38
Traes_4BL_762F09E09.1	TraesCS4B02G215800.1	0.7688	DNA-binding domain in plant proteins such as APETALA2 and EREBPs	3587.45
Traes_6DL_A05C1BF04.1	TraesCS6D02G268000.1	0.7887	Histone-like transcription factor (CBF/NF-Y) and archaeal histone	3586.81
Traes_2DS_97E3E7CFC.1	TraesCS2D02G198100.2	0.9676	WRKY transcription factor 20	3586.64
Traes_2DL_7D58E9850.1	TraesCS2B02G406600.1	0.7186	B-box zinc finger	3585.94
Traes_4BS_F83CB32DD.1	TraesCSU02G069000.1	0.7536	Myb-like DNA-binding domain	3584.44
Traes_4AL_BC54910D5.2	TraesCS4A02G226800.1	0.7356	ZF-HD protein dimerisation region	3582.26
Traes_4BS_9E4FBF387.1	TraesCS4B02G073400.1	0.993	B3 DNA binding domain	3581.95
Traes_4DL_66D0047A7.1	TraesCS4D02G276500.1	0.7483	heat shock factor	3581.43
TRAES3BF005100030CFD_	TraesCS3B02G375600.1	1		3581.23
Traes_4AL_A6AA602BC.1	TraesCS1D02G454400.1	0.8833	chromatin organization	3579.59
Traes_3DL_801E89185.1	TraesCS3D02G433200.1	1	helix loop helix domain	3579.58
Traes_4BL_7F70575F9.1	TraesCS4B02G361100.1	1	Lateral organ boundaries (LOB) domain	3579.55
Traes_2AS_7BD3963BD.1	TraesCS2A02G189600.1	0.8529	Belongs to the GRAS family	3579.48
Traes_5AL_8008803A5.1	TraesCS5A02G405800.1	0.8232	Myb-like DNA-binding domain	3579.22
Traes_5DL_4F38323F3.3	TraesCS5D02G298900.1	0.7015	SANT SWI3, ADA2, N-CoR and TFIIIB'' DNA-binding domains	3579.13
Traes_5BL_B569B5FF4.1	TraesCS7A02G014500.1	0.7826	Protein FAR1-RELATED SEQUENCE	3578.54
Traes_6DL_D722B6E13.1	TraesCS6D02G237000.1	0.7984	lipid binding	3578.32
Traes_7DS_B1FD1C84F.2	TraesCS7D02G091500.1	0.6585	Whirly transcription factor(WHY1)	3577.47
Traes_7DL_C343BA649.2	TraesCS7D02G475100.1	0.9514	bZIP transcription factor	3577.11
TRAES3BF183400010CFD_	TraesCS3B02G070400.1	0.9064		3576.78
Traes_2AL_61DB73424.1	TraesCS2A02G503100.1	0.7075	AP2 domain	3576.18
Traes_5BS_BE6397B54.2	TraesCS5B02G073700.1	0.9655	B3 DNA binding domain	3574.8
Traes_3AL_55A3F252C.1	TraesCS3A02G216200.1	0.7547	Myb-like DNA-binding domain	3573.05
Traes_2DL_343FA6101.1	TraesCS2D02G382800.1	0.7348	No apical meristem (NAM) protein	3572.81
Traes_3B_5D2D7A5A6.1	TraesCS3B02G003500.1	0.986		3572.33
Traes_5DS_94CF29476.1	TraesCS5D02G065300.2	0.7576	Tesmin/TSO1-like CXC domain	3571.14
Traes_2BL_4575D095D.1	TraesCS2B02G410200.2	0.7271	GATA zinc finger	3570.72
TRAES3BF135900010CFD_	TraesCS3B02G426900.1	0.7375		3570
Traes_2DL_8434C0251.2	TraesCS2D02G548900.1	0.9025	Auxin response factors (ARFs) are transcriptional factors that bind specifically to the DNA sequence 5'-TGTCTC-3' found in the auxin-responsive promoter elements (AuxREs)(ARF8)	3569.94
Traes_4DL_4164D3F4C.3	TraesCS4D02G340700.1	0.7438	domain associated with HOX domains	3569.69
Traes_5DS_5B1AB0AD3.2	TraesCS5D02G052200.2	0.7923	Nuclear transcription factor Y subunit A-7	3569.41
Traes_7DL_976FAF094.1	TraesCS7D02G294400.1	0.7872	transcription factor	3568.48
Traes_6AL_72D2B7C35.1	TraesCS6A02G269000.1	0.8291	MYB-CC type transfactor, LHEQLE motif	3566.77
TRAES3BF171600010CFD_	TraesCS5B02G315500.1	0.7624		3566.41
Traes_3DL_4E6EA6F5B.1	TraesCS3D02G291600.1	0.8545	transcription factor	3565.88
Traes_4DL_5851FBD0C.1	TraesCS4D02G329000.2	0.7485	Helix-loop-helix DNA-binding domain	3565.85
TRAES3BF104600030CFD_	TraesCS3B02G391900.1	0.7556		3564.79
Traes_2AL_73E4240F0.2	TraesCS2A02G320100.1	0.8547	Myb/SANT-like DNA-binding domain	3564.72
Traes_2BL_692BF6383.1	TraesCS2B02G363200.2	0.8462	Myb/SANT-like DNA-binding domain	3564.7
TRAES3BF020100090CFD_	TraesCS3B02G092500.1	0.9669		3564.6
Traes_2DL_31EED5C94.1	TraesCS2D02G456900.1	0.9591	SANT SWI3, ADA2, N-CoR and TFIIIB'' DNA-binding domains	3563.4
Traes_7AL_A33076690.3	TraesCS7A02G381900.1	0.9027	MYB-CC type transfactor, LHEQLE motif	3562.59
Traes_3AL_B68C491B0.1	TraesCS3D02G388700.1	0.7308	Helix-loop-helix DNA-binding domain	3562.44
Traes_2DL_07E54848B.1	TraesCS2D02G437600.1	1	MYB-CC type transfactor, LHEQLE motif	3561.24
Traes_2DS_E2F2E9EAF.1	TraesCS2D02G061600.1	0.7278	No apical meristem (NAM) protein	3560.74
Traes_2BL_F35AEBED4.1	TraesCS2B02G406600.2	0.7244	B-box zinc finger	3560.63
Traes_2BL_9558C4E24.2	TraesCS2B02G406600.2	0.7244	B-box zinc finger	3560.63
Traes_4BS_1281828D6.2	TraesCS4B02G044100.1	0.7458	Protein of unknown function, DUF573	3560.44
Traes_7AL_2D85286A1.1	TraesCS7A02G511800.2	0.9542	regulation of nucleic acid-templated transcription	3559.39
Traes_5BL_26B26165E.1	TraesCS5B02G282700.1	1	Lateral organ boundaries (LOB) domain	3558.55
Traes_6DS_20D189350.2	TraesCS6D02G097000.1	1	MYB-CC type transfactor, LHEQLE motif	3558.07
Traes_4DL_5E79CC79C.1	TraesCS4A02G130200.1	0.8217	Homeobox domain(WOX11)	3557.07
Traes_6AL_54D562BC2.1	TraesCS6A02G224300.1	0.7265	Myb-related protein Myb4	3556.22
Traes_6DS_965C8FA80.1	TraesCS6B02G173900.1	0.8525	regulation of nucleic acid-templated transcription	3553.8
Traes_6DL_552D41920.2	TraesCS6D02G309500.4	1	Myb DNA-binding like	3553.48
Traes_7BS_DC9822CEF.1	TraesCS7B02G009500.1	0.732	MADS-box transcription factor 25	3552.76
Traes_1BL_46340D685.1	TraesCS1B02G311000.1	0.9443	WRKY DNA -binding domain	3552.43
Traes_6AL_89BA7115C.1	TraesCS6A02G227700.1	0.7568	Myb-like DNA-binding domain	3550.28
Traes_4AL_234E1CDF6.1	TraesCS4D02G014100.2	1	WRKY DNA -binding domain	3548.84
Traes_7DS_A1673EBA1.2	TraesCS7D02G216600.1	0.8557	Nuclear transcription factor Y subunit	3548.01
Traes_7DS_22DE624A5.1	TraesCS7D02G148200.1	0.7496	Transcriptional activator that binds specific DNA sequence	3547.74
Traes_6BL_7C6B17284.2	TraesCS6B02G286400.1	0.9961	transcription factor(AGL6)	3546.21
Traes_3AL_B1E3D8BA1.1	TraesCS3A02G291900.2	0.8571	transcription factor	3546.07
Traes_5DL_45B242D3E1.	TraesCS5D02G318300.1	0.972		3545.86
Traes_5BL_D16B19610.1	TraesCS5D02G318900.1	0.7356	AP2 domain	3545.79
TRAES3BF100100070CFD_	TraesCS3B02G126800.1	1		3545.3
Traes_2AL_8A23618BA.1	TraesCS2A02G306800.1	1	No apical meristem (NAM) protein	3544.49
Traes_3DS_833AD0EE2.1	TraesCS3B02G017400.1	0.8929	Histone-like transcription factor (CBF/NF-Y) and archaeal histone(NF-YB3)	3543.3
Traes_4BS_2EA81743E1.	TraesCS4B02G141300.1	1		3542
Traes_6DL_FD6D63D1A.1	TraesCS6D02G237800.2	0.7973	AP2 domain	3540.62
Traes_7DS_791693792.1	TraesCS7A02G238500.1	0.9617	E2F/DP family winged-helix DNA-binding domain(DEL1)	3540.5
Traes_1AL_1FFBFB058.1	TraesCS1A02G306300.1	0.7906	basic region leucin zipper(AREB3)	3540.13
Traes_5DL_62A4CE1CC.2	TraesCS5D02G317400.1	0.8622	DNA-binding domain in plant proteins such as APETALA2 and EREBPs	3539.14
Traes_4BS_179F7B2E1.1	TraesCS4A02G306400.1	1	Histone-like transcription factor (CBF/NF-Y) and archaeal histone	3538.83
Traes_5AL_23D7DADBE.1	TraesCS5A02G192000.1	0.8487	zinc finger CCCH domain-containing protein	3538.78
Traes_2AS_D0C21ADB5.1	TraesCS2A02G011000.1	0.8644	DNA binding domain	3537.08
Traes_2DL_8BD9DC3DF.3	TraesCS2D02G576400.1	0.918	NAC domain-containing protein 7	3536.99
Traes_4DL_9DB76B434.1	TraesCS4D02G207600.1	0.7041	Dof domain, zinc finger	3535.97
Traes_1BL_CF98E922B.1	TraesCS1B02G318800.3	1	Transcriptional activator of alpha-amylase expression	3535.63
Traes_5BL_6C613A3D9.1	TraesCS5B02G125800.1	0.7395	basic region leucin zipper	3535.35
Traes_7DL_AF3F7B5B2.1	TraesCS7D02G292500.1	1	DNA-binding domain in plant proteins such as APETALA2 and EREBPs	3535.18
Traes_2BL_0A51FACEC1.	TraesCS2B02G431800.1	0.7781		3534.9
Traes_6DS_0E72E2E75.1	TraesCS6D02G051600.2	0.9876	helix loop helix domain	3534.72
Traes_4AL_7B4A6F76A.2	TraesCS4A02G252100.2	0.8661	Associated with HOX	3534.39
Traes_1BL_1A885E733.1	TraesCS1B02G323600.1	0.7488	Basic region leucine zipper	3534.29
Traes_3AS_413E4DDF6.1	TraesCS3A02G093300.1	0.7641	zinc finger	3533.75
Traes_5BL_8BEF7F9CD.1	TraesCS5B02G224100.1	1	DNA binding domain	3533.49
Traes_6DL_FDFCBA57D.1	TraesCS6D02G207300.1	0.7434	Myb-like DNA-binding domain	3533.05
Traes_6DL_FDFCBA57D1.	TraesCS6D02G207300.1	0.7434		3533.05
Traes_5DL_B97546DA11.	TraesCS5D02G225500.1	0.7167		3532.72
Traes_6DS_1E1A89D33.1	TraesCS6D02G080400.1	0.8998	domain in protein kinases, N-glycanases and other nuclear proteins	3532.68
Traes_4DL_73DC40D7B.1	TraesCS4A02G126300.3	0.9012	Seed dormancy control(OBF5)	3532.13
Traes_4AS_6EDD5ACF7.2	TraesCS4A02G126300.3	0.9012	Seed dormancy control(OBF5)	3532.13
Traes_6DL_6A7EFC4661.	TraesCS6D02G268400.1	0.8118		3531.31
Traes_2DS_CCA2FCCAD.1	TraesCS2D02G198200.1	0.8775	Belongs to the GRAS family	3530.96
Traes_5BL_98D063967.2	TraesCS5A02G314600.1	0.7902	DNA-binding domain in plant proteins such as APETALA2 and EREBPs	3530.32
Traes_5DS_107805DE3.1	TraesCS5D02G119200.1	0.8826	zinc finger CCCH domain-containing protein	3528.04
Traes_4BL_D9784B20C1.	TraesCS4B02G348500.1	0.7043		3527.95
TRAES3BF021000010CFD_	TraesCS3B02G255600.1	0.7389		3527.77
Traes_1DS_CE96E8BF0.1	TraesCS1D02G041700.1	0.7877	C2H2-type zinc finger	3527.06
Traes_6AS_9916DDE4D.2	TraesCS6A02G165800.1	0.9957	basic region leucin zipper	3525.8
Traes_6BS_00D311B94.1	TraesCS6B02G137300.1	1	MYB-CC type transfactor, LHEQLE motif	3525.75
Traes_1BS_E68807072.2	TraesCS1B02G076300.1	0.8124	DNA-binding domain in plant proteins such as APETALA2 and EREBPs	3524.43
Traes_2BL_E82F7902D.1	TraesCS2B02G510800.1	0.765	helix loop helix domain	3523.85
Traes_7DL_A773A64E2.2	TraesCS7D02G337000.1	0.9806	transcription regulatory region sequence-specific DNA binding	3523.6
Traes_2BL_EBA73F94F.1	TraesCS2B02G378100.1	0.7974	AP2-like ethylene-responsive transcription factor	3521.71
Traes_4DL_7BD3165FB.1	TraesCS4A02G087000.1	0.9364	Helix-loop-helix DNA-binding domain	3520.43
Traes_2BS_705DDDDC8.2	TraesCS2B02G020300.1	1	C2H2-type zinc finger	3519.41
TRAES3BF097400050CFD_	TraesCS3B02G273400.3	0.712		3519.22
Traes_4DL_F6ADA799C.1	TraesCS4D02G303500.1	0.7876	Homeobox associated leucine zipper	3519.14
Traes_6DS_A0EC5D808.1	TraesCS6D02G126900.1	0.9682	transcription factor GAMyb	3518.54
Traes_4AS_86FF10C36.1	TraesCS4A02G017700.1	0.7786	Dof domain, zinc finger	3518.18
Traes_1BS_282C4747C.2	TraesCS1B02G086600.2	0.9635	SANT SWI3, ADA2, N-CoR and TFIIIB'' DNA-binding domains	3517.06
Traes_2BL_8BDCCE9F8.1	TraesCS2B02G534000.1	0.8186	DNA-binding domain in plant proteins such as APETALA2 and EREBPs	3516.9
Traes_5BS_735791EC5.2	TraesCS5B02G113400.1	0.972	zinc finger CCCH domain-containing protein	3516.23
Traes_5AS_8756ECB5A.2	TraesCS5A02G041500.1	0.8157	single-stranded telomeric DNA binding	3516.2
Traes_4AL_17C974117.1	TraesCS4A02G172200.1	0.9563	Myb-like DNA-binding domain	3515.05
TRAES3BF081400030CFD_	TraesCS3B02G375300.1	0.7251		3514.57
Traes_6DL_032299C05.2	TraesCS6B02G310500.1	0.9194	zinc finger	3513.89
Traes_4DL_DA70DBAFC.1	TraesCS4D02G275500.1	0.7002	bHLH-MYC and R2R3-MYB transcription factors N-terminal	3513.85
Traes_4BL_B64C157DC.1	TraesCS4B02G385800.1	1	heat shock factor	3513.64
Traes_7BL_C35CABF69.1	TraesCS7B02G238000.1	0.8791	Myb-like DNA-binding domain	3513.62
Traes_1DS_711044AD5.1	TraesCS1D02G021700.1	1	Myb-related protein P(MYB12)	3513.28
TRAES3BF082500050CFD_	TraesCS3B02G286500.1	0.7206		3512.59
Traes_1BL_794E99FF5.1	TraesCS1B02G212000.1	0.9408	WRKY DNA -binding domain	3512.49
Traes_5DL_98FA0887C.1	TraesCS5D02G184400.1	0.9883	zinc finger	3511.87
Traes_5BS_49C7C1976.2	TraesCS5B02G047100.2	0.7882	Nuclear transcription factor Y subunit A-7	3511.4
Traes_4AL_1A0E673DC.1	TraesCS4D02G310000.1	0.9426	DNA-binding domain in plant proteins such as APETALA2 and EREBPs	3511.21
Traes_7DS_05F0F0B64.1	TraesCS7D02G107200.1	0.7158	MADS-box transcription factor 25	3510.17
Traes_6BS_00E54518B.1	TraesCS6B02G215200.1	0.8941	transcription factor bHLH041	3509.46
Traes_4AS_B95A1C3A1.1	TraesCS4A02G130600.1	0.8048	No apical meristem (NAM) protein	3508.03
Traes_4DS_D770B519F.2	TraesCS6B02G357700.1	0.9942	-	3507.01
Traes_2AL_BD0C7A9A5.2	TraesCS2A02G526300.1	0.9441	Seed dormancy control	3505.97
Traes_4DL_59B1C9052.1	TraesCS4D02G322500.1	0.7707	transcription, DNA-templated(RAV1)	3505.79
Traes_7BL_83946C3EC.1	TraesCS7B02G304000.1	0.8211	Whole genome shotgun sequence of line PN40024, scaffold_7.assembly12x (Fragment)	3504.82
TRAES3BF100600040CFD_	TraesCS3B02G194000.1	0.974		3504.75
Traes_3DL_4D42B475B.2	TraesCS3D02G468400.1	0.75	RNA polymerase II transcription regulator recruiting activity	3504.68
Traes_2AL_9959DBD0D.1	TraesCS2A02G388500.1	0.7339	B-box zinc finger	3504.06
Traes_2AS_620B821281.	TraesCS2A02G214400.1	0.8546		3502.34
Traes_6AS_4EEA3E388.1	TraesCS6A02G053700.1	1	Lateral organ boundaries (LOB) domain	3501.75
Traes_6DL_D1C1DBD34.1	TraesCS6D02G273500.2	0.8475	SRF-type transcription factor (DNA-binding and dimerisation domain)	3501.32
Traes_5BL_8C181ECA8.2	TraesCS5A02G279200.2	0.7154	helix loop helix domain	3500.83
Traes_1AS_24511D656.1	TraesCS1A02G045000.1	0.9296	MADS	3500.5
Traes_5AS_E9E60BA43.2	TraesCS5D02G002100.1	0.9953	MADS-box transcription factor	3499.85
Traes_2BL_26F24E716.1	TraesCS2B02G281000.1	0.9222	MADS-box transcription factor(AP1)	3498.78
Traes_4BL_EFEC50B26.2	TraesCS4B02G165900.2	0.71	DNA binding domain(WRKY4)	3498.15
Traes_6BS_D373D1A96.2	TraesCS6D02G049300.1	0.7725	Zinc finger, C2H2 type	3497.9
Traes_4DS_DC3C9DC42.2	TraesCS4D02G151700.1	0.7647	DNA binding domain(WRKY4)	3497.83
Traes_5BL_3900B9128.1	TraesCS5B02G415600.1	0.7385	No apical meristem (NAM) protein	3496.63
Traes_3AS_1B9CD4863.1	TraesCS3A02G077700.1	0.9976	helix loop helix domain	3496.33
Traes_2AL_20C2D79E1.2	TraesCS2A02G261200.2	0.9188	MADS-box transcription factor(AP1)	3494.63
Traes_7AL_17EF1FF01.2	TraesCS7A02G502300.1	0.8637	cheY-homologous receiver domain	3492.88
Traes_3AL_2A2EDCD51.1	TraesCS3A02G245900.2	0.8271	No apical meristem (NAM) protein	3492.81
Traes_2DL_662837152.1	TraesCS2D02G325000.1	0.9388	MADS	3489.67
Traes_2BL_E7871AFBA.1	TraesCS2B02G305500.1	0.8023	DNA-binding domain in plant proteins such as APETALA2 and EREBPs	3488.55
Traes_2BL_5DC21F3CD.1	TraesCS2B02G305500.1	0.8023	DNA-binding domain in plant proteins such as APETALA2 and EREBPs	3488.55
Traes_1DL_23D036A85.1	TraesCS1D02G417100.1	0.7434	G-box binding protein MFMR(GBF3)	3488.1
Traes_7BL_2782B04F1.2	TraesCS7B02G489500.2	0.9452	Protein CUP-SHAPED COTYLEDON 2	3487.7
Traes_7AL_1415D04BF.1	TraesCS7A02G461700.1	0.8719	Auxin response factors (ARFs) are transcriptional factors that bind specifically to the DNA sequence 5'-TGTCTC-3' found in the auxin-responsive promoter elements (AuxREs)(ARF6)	3487.4
Traes_7DL_DDCC09B24.1	TraesCS7B02G286600.2	0.9063	MADS-box transcription factor(TM6)	3486.72
Traes_1AL_F16BCEC90.2	TraesCS1A02G327100.1	0.9959	Tesmin/TSO1-like CXC domain	3486.44
TRAES3BF153400050CFD_	TraesCS3B02G600800.3	1		3485.28
Traes_5DL_C5D9E96D4.1	TraesCS5D02G161000.1	0.8963	dof zinc finger protein	3485.2
Traes_4BL_B92B51F5D.1	TraesCS4B02G174000.1	0.823	No apical meristem (NAM) protein	3484.86
Traes_5BS_360DD5644.1	TraesCS5B02G047200.1	0.8835	MEKHLA domain	3484.51
Traes_6AL_AFC0B56BD.1	TraesCS6A02G319500.1	0.7929	DNA-binding domain in plant proteins such as APETALA2 and EREBPs	3483.97
Traes_7BS_9D42F9BEA.2	TraesCS7B02G009800.1	1	MADS-box transcription factor 25	3483.61
Traes_5AL_0684A2454.1	TraesCS5A02G178500.1	0.7744	MYB-CC type transfactor, LHEQLE motif	3483.47
Traes_1AL_0BE456AC0.1	TraesCS1A02G157500.1	0.939	START domain(REV)	3482.49
Traes_5BS_FC54F9BEA.1	TraesCS5B02G017700.1	0.7939	Basic region leucine zipper	3482
Traes_7BL_8A5D12EE1.1	TraesCS7B02G219400.1	0.746	No apical meristem (NAM) protein	3481.8
Traes_7AL_4E68C2154.1	TraesCS7A02G483100.1	0.9818	MYB-CC type transfactor, LHEQLE motif	3481.7
Traes_6BL_A8D141E69.1	TraesCS6B02G427100.1	0.967	Ethylene-responsive transcription factor 1	3481.52
Traes_2AS_4C9807337.1	TraesCS2A02G152900.1	0.7195	Myb-like DNA-binding domain	3479.86
Traes_5BL_BA26BA910.1	TraesCS5B02G519700.1	0.9447	zinc finger	3479.68
Traes_2BL_3041037F1.1	TraesCS2B02G478700.1	0.9639	SANT SWI3, ADA2, N-CoR and TFIIIB'' DNA-binding domains	3478.99
Traes_2AL_5BA7E2623.1	TraesCS2D02G515800.1	0.9353	DNA-binding domain in plant proteins such as APETALA2 and EREBPs(AP2)	3477.89
Traes_5BL_B795CE108.2	TraesCS5B02G312000.1	1	DNA-binding domain in plant proteins such as APETALA2 and EREBPs(CBF14)	3477.87
Traes_7AS_45F0BB787.2	TraesCS7D02G091500.1	0.6491	Whirly transcription factor(WHY1)	3477.01
Traes_6AS_AE7376F74.1	TraesCS6A02G091500.1	0.9022	domain in protein kinases, N-glycanases and other nuclear proteins	3476.96
Traes_4AL_40E835A94.2	TraesCS4A02G262500.1	1	Myb-like DNA-binding domain	3476.89
TRAES3BF024100070CFD_	TraesCS3B02G453000.1	1		3476.83
Traes_3AL_2297D6E18.1	TraesCS3A02G343100.1	0.7396	WRKY DNA -binding domain	3476.8
Traes_4DS_4C4EB1D21.2	TraesCS4D02G147000.1	0.8583	MADS	3476.48
Traes_3AS_037375C84.1	TraesCS3A02G104400.1	0.9637	Helix-loop-helix DNA-binding domain	3475.81
Traes_4AL_E57587E16.1	TraesCS4A02G222700.1	1	TCP family transcription factor	3475.65
Traes_7AS_360247894.1	TraesCS7A02G111800.1	0.9836	transcription regulatory region sequence-specific DNA binding	3475.46
Traes_5BL_2DDBAA0C2.1	TraesCS5B02G426200.1	1	TCP family transcription factor	3475.43
Traes_1BL_0FD62B7F8.1	TraesCS1B02G444400.1	0.9577	Zinc finger C-x8-C-x5-C-x3-H type (and similar)	3474.52
TRAES3BF075200070CFD_	TraesCS3B02G354900.1	0.997		3473.88
Traes_4DS_808AD9543.2	TraesCS4D02G071300.1	0.9623	transcription factor KAN4	3472.17
Traes_7AL_5B57EF9FC.2	TraesCS7A02G414300.1	1	Myb-like DNA-binding domain	3471.13
Traes_6BL_0D6CD031E.1	TraesCS6B02G349200.1	0.9849	Myb-like DNA-binding domain	3470.88
TRAES3BF007300580CFD_	TraesCS3B02G190100.1	0.9908		3470.52
Traes_6BL_3F8DB6043.1	TraesCS6D02G220400.1	0.8991	YABBY protein	3469.28
Traes_4AS_9E9E5FD89.2	TraesCS4B02G222000.1	0.9643	SANT SWI3, ADA2, N-CoR and TFIIIB'' DNA-binding domains	3468.7
Traes_1DS_D4E92DDD4.1	TraesCS1D02G040700.1	0.7514	protein desumoylation	3467.86
Traes_4AL_5E7F93445.2	TraesCS4A02G183400.2	0.9986	DNA-binding transcription factor activity	3467.64
Traes_2AL_FAB4B4A20.2	TraesCS2A02G442500.1	1	Helix-loop-helix DNA-binding domain	3466.8
Traes_2BL_79F1B50DF.1	TraesCS2B02G387000.1	0.7617	SANT SWI3, ADA2, N-CoR and TFIIIB'' DNA-binding domains	3466.68
TRAES3BF023000040CFD_	TraesCS3B02G331200.1	0.9298		3465.06
Traes_5BL_71FC575B0.1	TraesCS5B02G395200.1	0.8844	Transcriptional adapter	3464.96
Traes_4BL_39AE2989D.1	TraesCS4B02G312400.1	1	DNA-binding domain in plant proteins such as APETALA2 and EREBPs	3464.23
Traes_2AL_6E76DBE34.1	TraesCS2A02G538500.1	0.9374	helix loop helix domain	3463.89
Traes_2BS_31F130A79.1	TraesCSU02G012400.1	0.9839	glycine rich nucleic binding domain	3463.64
Traes_7AL_C8835D919.2	TraesCS7A02G569100.1	1	Protein CUP-SHAPED COTYLEDON 2	3463.56
Traes_2DL_8BE259F4B.1	TraesCS2D02G270000.2	0.9632	helix loop helix domain	3463.52
Traes_3DL_EA11AA497.2	TraesCS3D02G231200.2	0.9514	Zinc finger C-x8-C-x5-C-x3-H type (and similar)(HUA1)	3462.16
Traes_2BS_2244C64CC.1	TraesCS2B02G076100.1	0.7206	No apical meristem (NAM) protein	3461.04
Traes_4AL_5E86DF14B.1	TraesCS4A02G259200.1	0.7422	DNA-binding domain in plant proteins such as APETALA2 and EREBPs	3459.87
Traes_2DL_AD34A7228.2	TraesCS2D02G274600.1	0.9692	helix loop helix domain	3459.13
Traes_2DS_93EAEC654.2	TraesCS2D02G105400.1	1	basic region leucin zipper	3458.38
Traes_5BS_3B409615C.1	TraesCS7A02G511800.1	0.9534	regulation of nucleic acid-templated transcription	3458.26
Traes_5DL_34CCC8525.1	TraesCS7A02G014500.1	0.7122	Protein FAR1-RELATED SEQUENCE	3458.03
Traes_5DL_1C6A8C773.1	TraesCS5D02G385000.1	0.7158	single-stranded telomeric DNA binding	3456.05
TRAES3BF096900170CFD_	TraesCS3B02G125600.1	0.8541		3455.55
Traes_7DS_E5A18AAA4.1	TraesCS7A02G207100.1	0.7589	Transcription factor	3455.53
Traes_1DL_57F246ADF.1	TraesCS1D02G307500.2	0.8483	Transcriptional activator of alpha-amylase expression	3455.07
Traes_5BL_486D0D865.1	TraesCS5B02G157300.1	0.8152	Myb-like DNA-binding domain	3454.88
Traes_2BS_F23D9EA93.1	TraesCS2B02G199800.1	0.7617	Histone-like transcription factor (CBF/NF-Y) and archaeal histone(NF-YB3)	3453.73
Traes_7AL_C0DB55E98.2	TraesCS7D02G326300.2	0.7193	B3 DNA binding domain	3453.06
Traes_2DS_9F6EA1670.1	TraesCS2D02G100300.1	0.7094	Dof domain, zinc finger	3452.92
Traes_5BL_C8BEC527F.1	TraesCS5B02G138100.1	0.9612	Belongs to the GRAS family	3451.48
Traes_1AL_79B8C6F15.1	TraesCS1A02G332600.1	1	TCP family transcription factor	3451.25
TRAES3BF104900050CFD_	TraesCS3B02G124100.1	0.8797		3450.97
TRAES3BF076600020CFD_	TraesCS3B02G122800.1	1		3450.68
Traes_5BL_F2AF1D802.1	TraesCS1D02G454400.1	0.8833	chromatin organization	3449.35
TRAES3BF094400050CFD_	TraesCS3B02G371200.1	0.9744		3447.69
Traes_2AS_25C93FD291.	TraesCS2A02G097200.1	0.7911		3447.56
Traes_2AS_25C93FD29.1	TraesCS2A02G097200.1	0.7911	Myb-like DNA-binding domain	3447.56
Traes_7BS_7E91DE546.1	TraesCS7B02G085100.1	0.735	Myb-like DNA-binding domain	3445.61
Traes_5BL_3BA7EA9A3.1	TraesCS3D02G109400.4	0.2727	No apical meristem (NAM) protein	3444.66
Traes_6DS_8F05AE571.2	TraesCS6A02G037700.1	0.7614	SANT SWI3, ADA2, N-CoR and TFIIIB'' DNA-binding domains	3444.62
Traes_2DL_5F0BD9D6F.1	TraesCS2A02G472300.1	0.9844	helix loop helix domain	3443.8
Traes_2AL_2A39D7445.2	TraesCS2A02G267600.1	0.7861	DNA-binding domain in plant proteins such as APETALA2 and EREBPs	3442.5
Traes_3AL_48A1E60D0.1	TraesCS3A02G285500.2	0.9417	B3 DNA binding domain	3441.71
Traes_2AL_E5B3B79F7.1	TraesCS2A02G447300.1	0.7248	Myb-like DNA-binding domain	3440.35
Traes_7DL_2DE6C6D33.1	TraesCS7D02G543500.2	0.9526	Protein CUP-SHAPED COTYLEDON 2	3439.04
Traes_4AS_45B416B25.1	TraesCS4A02G135600.2	0.993	Transcription factor RF2b	3437.99
Traes_2AL_C81692E4F.1	TraesCS2A02G312200.1	1	zinc finger	3437.86
Traes_5BL_054434680.2	TraesCS5B02G380200.1	0.7734	transcription factor	3437.77
TRAES3BF106000020CFD_	TraesCS3A02G404400.1	0.7051		3437.64
Traes_5DS_9B9365AF7.1	TraesCS5D02G027700.1	1	GATA zinc finger	3437.57
Traes_5DS_9B9365AF71.	TraesCS5D02G027700.1	1		3437.57
Traes_1AL_80D0BD0DC.1	TraesCS1A02G313600.1	0.949	C2H2-type zinc finger	3435.95
Traes_5DL_5DA6E1A09.1	TraesCS5D02G313600.1	0.9498	Helix-loop-helix DNA-binding domain	3435.86
Traes_6AL_857D5AAEB.1	TraesCS6A02G287300.1	0.7848	Histone-like transcription factor (CBF/NF-Y) and archaeal histone	3435.62
Traes_4DS_5644BB36D.3	TraesCS4D02G127800.1	1	Belongs to the GRAS family	3435.57
Traes_6AL_2BA02CAA9.1	TraesCS6A02G319000.1	1	Myb-like DNA-binding domain	3435.54
Traes_4BL_57E9A2C6B.2	TraesCS4D02G329000.2	0.9858	Helix-loop-helix DNA-binding domain	3435.51
Traes_7BS_DBAD99848.1	TraesCS7D02G216600.1	0.8303	Nuclear transcription factor Y subunit	3435.22
Traes_3DL_6BBC889A1.1	TraesCS3D02G353500.1	0.7438	Myb-like DNA-binding domain(MYB3R-5)	3434.9
Traes_3AL_35CA14632.1	TraesCS3A02G205800.1	0.8491	Zinc finger, C2H2 type	3434.47
Traes_2AL_A7941CB12.2	TraesCS2A02G547800.1	0.9025	Auxin response factors (ARFs) are transcriptional factors that bind specifically to the DNA sequence 5'-TGTCTC-3' found in the auxin-responsive promoter elements (AuxREs)(ARF8)	3434.23
Traes_1BL_8709BB152.2	TraesCS1B02G266100.2	0.9597	Squamosa promoter-binding-like protein 9(SPL7)	3434.15
Traes_5DL_50E35B4F3.1	TraesCS5D02G490500.1	0.9412	C2H2-type zinc finger	3433.36
Traes_2AS_72E9B68D2.2	TraesCS2A02G109800.1	1	AP2 domain	3433.23
Traes_4BL_97EDABD02.2	TraesCS4B02G197100.1	0.7838	Lateral organ boundaries (LOB) domain	3432.85
Traes_3AL_140B829CB.2	TraesCS3A02G228600.1	0.7741	WRKY DNA -binding domain(WRKY28)	3432.46
Traes_6BS_0A692E6F6.1	TraesCS6B02G160100.1	1	Whirly transcription factor	3432.04
Traes_2DL_0B54293DE.2	TraesCS2D02G336500.1	0.9091	No apical meristem (NAM) protein	3432.02
Traes_4BS_E46925D04.1	TraesCS4B02G101400.1	1	B3 DNA binding domain	3431.91
Traes_1BS_D1FCBFBE8.1	TraesCS1B02G100400.2	1	helix loop helix domain	3431.16
Traes_1BS_E3FCA98E3.2	TraesCS1B02G127400.2	0.9489	Seed dormancy control(OBF5)	3430.77
Traes_6AS_C15119294.1	TraesCS6A02G126000.1	0.7726	zinc finger	3430.76
Traes_7BS_CCA195724.2	TraesCS7B02G103500.2	0.7694	E2F/DP family winged-helix DNA-binding domain(DEL1)	3429.72
Traes_5BL_F5D379AFC.1	TraesCS5B02G236900.1	0.7029	DNA-binding domain in plant proteins such as APETALA2 and EREBPs	3429.44
Traes_7BL_0258A9A33.2	TraesCS7B02G377500.1	0.7477	Nuclear transcription factor Y subunit	3429.21
Traes_4DL_55503B3CD.1	TraesCSU02G138900.1	0.9524	Transcription factor	3428.88
Traes_2AL_43491B9E0.1	TraesCS2A02G415100.1	0.9291	AP2 domain	3427.46
Traes_2AL_8D3A3687D.2	TraesCS2A02G441300.1	0.7434	MYB-CC type transfactor, LHEQLE motif	3426.19
TRAES3BF096900070CFD_	TraesCS3B02G126200.3	0.9789		3425.99
Traes_4DS_FAFED0328.2	TraesCS4B02G117400.2	0.9978	basic region leucin zipper	3425.49
Traes_5BS_580CC3E5F.2	TraesCS5B02G073800.1	0.9217	B3 DNA binding domain	3424.94
Traes_3DS_70F9BD124.1	TraesCS3D02G099500.2	0.9706	Dehydration-responsive element-binding protein	3424.22
Traes_1AL_C921492AA.1	TraesCS1A02G255300.1	1	Squamosa promoter-binding-like protein 9(SPL7)	3423.32
Traes_5DL_B69423A67.1	TraesCS5D02G360700.1	1	No apical meristem (NAM) protein	3422.22
Traes_3DL_48F7A19D2.1	TraesCS3D02G337100.1	0.9021	WRKY DNA -binding domain	3421.93
Traes_2DS_2D035BAFD.1	TraesCS2D02G220200.1	0.8582	Belongs to the GRAS family	3421.58
Traes_6DL_29EF04226.1	TraesCS6D02G327300.1	1	Myb-like DNA-binding domain	3421.04
Traes_2AL_2FE59A2DC.1	TraesCS2A02G398300.1	0.7682	QLQ	3420.87
Traes_2BL_AE7EE9B5D.1	TraesCS2B02G355700.1	0.8907	No apical meristem (NAM) protein	3420.86
Traes_4AS_93BB8FB3E.1	TraesCS4A02G060400.2	0.827	DNA-binding domain in plant proteins such as APETALA2 and EREBPs	3420.66
Traes_7DL_67C4287B2.2	TraesCS5B02G470600.2	0.9367	basic region leucin zipper(GBF1)	3420.59
Traes_1DL_DA67871B9.1	TraesCS1A02G273000.1	0.7778	basic region leucin zipper	3419.22
Traes_4DL_4EE7DFCCD.1	TraesCS4D02G359100.1	0.7523	Myb-like DNA-binding domain	3419.09
Traes_4AS_9450AD3F4.1	TraesCS4A02G001300.1	1	AP2 domain	3418.74
Traes_4AS_1EA23DE08.1	TraesCS4A02G040600.1	0.7768	Homeobox domain	3418.58
Traes_7DL_52D5D13A1.1	TraesCS7D02G462100.1	0.9436	Nuclear transcription factor Y subunit	3418.32
Traes_4BL_FE8B8ABC4.1	TraesCSU02G069000.1	0.7989	Myb-like DNA-binding domain	3417.56
Traes_4AL_538993FFD.1	TraesCS4A02G241500.1	0.9524	B3 DNA binding domain	3416.92
Traes_4BL_2E125A702.1	TraesCS4B02G278100.1	0.7029	heat shock factor	3415.89
Traes_6DL_A014E9069.1	TraesCS6D02G219300.1	0.7102	Myb-like DNA-binding domain	3413.75
Traes_4DL_43D63ABE3.1	TraesCS4D02G312800.1	1	Lateral organ boundaries (LOB) domain	3413.22
Traes_5DL_91AE6CA271.	TraesCS5D02G318799.1	1		3412.63
Traes_1AL_95111FAAC.2	TraesCS1A02G288500.1	0.9015	Nuclear transcription factor Y subunit	3412.46
Traes_5DL_C794C1EEA.3	TraesCS5D02G124600.2	1	transcription factor	3412.43
Traes_6DL_882BC1812.1	TraesCS6D02G250700.1	0.7089	Helix-loop-helix DNA-binding domain	3411.77
TRAES3BF071400020CFD_	TraesCS3B02G224500.1	1		3410.48
Traes_2BS_D435A8999.1	TraesCS2B02G217400.2	0.9637	WRKY transcription factor 20	3409.75
Traes_6AS_DBE4E3146.2	TraesCS6A02G108800.1	1	MYB-CC type transfactor, LHEQLE motif	3407.72
Traes_4BL_0F2281616.2	TraesCSU02G069400.1	0.8085	Helix-loop-helix DNA-binding domain	3407.51
Traes_2BL_FDD7CBAD0.2	TraesCS2B02G293300.1	1	helix loop helix domain	3407.44
Traes_4DL_FA07D8414.1	TraesCSU02G127200.1	0.7416	heat shock factor	3407.36
Traes_6BS_96BBFCC97.1	TraesCS6B02G096500.1	0.8734	Homeobox-leucine zipper protein	3406.62
Traes_2AL_A7EA252CA.1	TraesCS2A02G382400.2	0.8712	No apical meristem (NAM) protein	3406.59
Traes_3AL_E34DF2F08.1	TraesCS3A02G442000.1	0.8378	Auxin response factors (ARFs) are transcriptional factors that bind specifically to the DNA sequence 5'-TGTCTC-3' found in the auxin-responsive promoter elements (AuxREs)(ARF2)	3406.06
Traes_2DS_291916365.1	TraesCS2D02G100900.1	0.9744	No apical meristem (NAM) protein	3405.99
Traes_4DL_D96E9236F.1	TraesCS4D02G298400.1	0.9182	AP2 domain	3405.69
Traes_6AL_44D4E284B.2	TraesCSU02G080900.1	0.724	Ethylene insensitive 3	3405.5
Traes_6BL_53201E1DB.1	TraesCS6B02G293700.1	0.8429	Myb-like DNA-binding domain	3405.46
Traes_4DS_DA83A5E27.1	TraesCS4D02G094400.1	1	No apical meristem (NAM) protein(NAC5)	3403.59
Traes_3AL_152A7186A.1	TraesCS3A02G368700.1	0.8947	Myb-like DNA-binding domain	3403.58
Traes_1AL_258E7F2A3.1	TraesCS1A02G370600.1	0.7071	DNA-binding domain in plant proteins such as APETALA2 and EREBPs	3403.48
Traes_4DS_926486EE0.1	TraesCS4D02G052600.1	0.8228	Myb-like DNA-binding domain	3402.59
Traes_7AL_38B48B7B2.2	TraesCS7A02G569300.1	0.795	Protein CUP-SHAPED COTYLEDON 2	3402.47
Traes_4BL_CDCFB216C.1	TraesCS4B02G215700.1	0.8657	Belongs to the GRAS family	3402.44
Traes_4DS_0521C8ABF.1	TraesCS4D02G129900.1	0.8287	DNA-binding transcription factor activity	3402.04
TRAES3BF267500040CFD_	TraesCS3B02G081000.1	0.9126		3401.85
Traes_4AS_0D75149B5.1	TraesCS4A02G013600.1	0.8185	AP2 domain	3401.3
Traes_2AL_3035352F3.1	TraesCS2A02G255900.1	0.9876	C2H2-type zinc finger	3400.1
Traes_7DL_1FA87027B.1	TraesCS7D02G514800.1	0.7169	Myb-like DNA-binding domain	3399.79
Traes_2AS_E17243D52.1	TraesCS2B02G212300.1	0.935	Belongs to the GRAS family	3399.72
Traes_2AS_4C4190DEB.2	TraesCS2A02G229400.1	0.7874	IQ calmodulin-binding motif	3399.69
Traes_2DS_96B438D92.1	TraesCS2D02G236200.2	0.9903	Disordered region downstream of MFMR(GBF1)	3399.68
Traes_2AL_61C5A2D03.1	TraesCS2A02G565900.1	0.8557	(NAC) domain-containing protein	3398.01
Traes_5AL_39649C38E.1	TraesCS5A02G265600.1	0.7687	Seed dormancy control	3396.88
Traes_7AL_48C81DE03.1	TraesCS7B02G185400.2	0.7238	DNA binding domain	3396.82
Traes_7AL_48C81DE031.	TraesCS7B02G185400.2	0.7238		3396.82
Traes_1DL_93BCED372.2	TraesCS1D02G254700.1	0.9756	Squamosa promoter-binding-like protein 9(SPL7)	3396.51
Traes_2BL_1EBB348CB.1	TraesCS2A02G554200.1	1	SANT SWI3, ADA2, N-CoR and TFIIIB'' DNA-binding domains	3394.26
Traes_2AL_41B71F83C.1	TraesCS2A02G370000.1	0.7692	SANT SWI3, ADA2, N-CoR and TFIIIB'' DNA-binding domains	3394.12
Traes_4DS_352C41430.2	TraesCS4D02G098100.1	0.9536	B3 DNA binding domain	3394.08
Traes_5AL_DD30903BD.1	TraesCS4D02G316800.1	0.9195	No apical meristem (NAM) protein	3393.6
TRAES3BF025700050CFD_	TraesCS4B02G383200.1	0.8444		3392.45
Traes_7AS_B8E8A2F55.1	TraesCS7A02G179900.1	0.7382	Myb-like DNA-binding domain	3392.27
Traes_4AL_8FABAA6C3.2	TraesCS4A02G421300.1	1	NAC domain-containing protein 43	3390.48
Traes_7BL_056959446.1	TraesCS7B02G294500.1	0.8988	B3 DNA binding domain	3390.23
Traes_2BS_5E7287209.1	TraesCS2B02G127800.1	1	AP2 domain	3389.76
Traes_7DS_433704E8E1.	TraesCS7D02G147100.1	0.7692		3389.31
Traes_7DS_433704E8E.1	TraesCS7D02G147100.1	0.7692	AP2 domain	3389.31
Traes_1DL_D550418641.	TraesCS1D02G363300.1	0.9014		3388.9
Traes_5BL_A848F629F.1	TraesCS5B02G410500.1	0.8232	Myb-like DNA-binding domain	3388.87
Traes_6AL_13895C140.1	TraesCS6A02G196500.2	0.9769	AP2 domain	3388.18
Traes_3DL_E22D9AEAE.1	TraesCS3A02G324000.2	0.9661	helix loop helix domain	3387.31
Traes_7AS_C25A349A9.1	TraesCS7A02G122100.1	0.7788	K-box region	3385.49
Traes_2AL_723E42163.2	TraesCS2A02G245700.1	1	Disordered region downstream of MFMR(GBF1)	3385.17
Traes_6DL_187F01785.1	TraesCS6D02G268100.1	1	Histone-like transcription factor (CBF/NF-Y) and archaeal histone	3384.75
Traes_6DL_D0BE06357.1	TraesCS6D02G220600.1	0.8348	No apical meristem (NAM) protein	3382.72
Traes_5BL_D45BBFEBC.1	TraesCS5B02G307100.1	0.9963	Helix-loop-helix DNA-binding domain	3382.4
Traes_2DS_EEE59C2E7.1	TraesCS2D02G234000.1	0.939	Myb-like DNA-binding domain	3380.89
Traes_6AS_5562B97F7.1	TraesCS6A02G137800.1	1	transcription factor GAMyb	3380.47
Traes_2DS_896F9F33B.1	TraesCS2D02G158500.1	0.9698	B3 DNA binding domain	3379.08
TRAES3BF186800050CFD_	TraesCS3A02G109300.1	0.7915		3377.92
Traes_5BL_692FEF87A.3	TraesCS5B02G377500.1	0.7007	single-stranded telomeric DNA binding	3377.3
Traes_2AL_E687AF1BE.2	TraesCS2A02G267400.1	0.8651	sequence-specific DNA binding	3377.16
Traes_5BL_39FF03C5D.1	TraesCS5B02G415400.1	0.7622	No apical meristem (NAM) protein	3376.98
Traes_5BL_F853EA802.1	TraesCS5B02G183800.1	0.9335	WRKY transcription factor(WRKY30)	3376.45
Traes_4DL_A76BE77E4.1	TraesCS4D02G302700.1	0.7759	Helix-loop-helix DNA-binding domain	3376.37
Traes_2BL_C594B831F.2	TraesCS2D02G254400.3	0.9407	helix loop helix domain	3376.22
Traes_5BS_E635B0A281.	TraesCS5B02G086900.1	0.7914		3376.13
Traes_6BL_8F77BF933.1	TraesCS6B02G286200.2	0.8216	No apical meristem (NAM) protein	3375.5
Traes_4DL_14C563681.1	TraesCS4D02G339100.1	0.7806	Myb-like DNA-binding domain	3374.43
Traes_2BL_46BA39C7B.2	TraesCS2B02G530400.1	0.8046	DNA binding	3373.87
Traes_4DS_71AA74F78.1	TraesCS4D02G019800.1	0.9091	DNA binding	3373.03
TRAES3BF044200110CFD_	TraesCS3B02G414500.1	0.7727		3372.81
TRAES3BF009000040CFD_	TraesCS3B02G470000.1	0.9641		3370.43
Traes_2AL_232DE3B52.1	TraesCS7A02G014500.1	0.7447	Protein FAR1-RELATED SEQUENCE	3370.34
Traes_6DL_4C3F04219.1	TraesCS6D02G315700.1	0.8385	QLQ	3369.93
Traes_1AS_1EE692FDC.1	TraesCS1A02G083100.1	0.9274	Myb-like DNA-binding domain	3369.47
Traes_2DS_5DF921ABB.1	TraesCS2D02G214100.1	0.9823	transcription, DNA-templated	3369.08
Traes_3B_D9F27151E.1	TraesCS3B02G423600.1	0.824		3368.99
Traes_1AS_36AF74187.2	TraesCS1A02G076200.1	1	Myb-like DNA-binding domain	3366.34
Traes_6AL_FF1508B19.1	TraesCS6A02G344700.1	0.7784	Myb-like DNA-binding domain	3366.29
Traes_3AL_ECA64A822.1	TraesCS3D02G388700.1	0.75	Helix-loop-helix DNA-binding domain	3365.23
Traes_4AL_99942CBEA.2	TraesCS4A02G420100.1	0.995	NAC domain-containing protein 43	3365.06
Traes_7BS_4D5DE99CC.1	TraesCS7B02G158900.1	0.7391	transcription regulatory region sequence-specific DNA binding	3364.01
Traes_5DL_41E3B1B23.1	TraesCS5D02G320800.1	0.8051	DNA-binding domain in plant proteins such as APETALA2 and EREBPs	3363.13
Traes_1AL_25726E5E7.1	TraesCS1A02G366200.1	0.8316	Myb-related protein Hv33	3362.91
Traes_7DS_5CB1C2862.2	TraesCS7D02G062600.1	0.8852	NAC domain-containing protein	3362.55
Traes_1AL_F18EC96DF.1	TraesCS1A02G409800.2	0.7478	G-box binding protein MFMR(GBF3)	3361.58
TRAES3BF267500030CFD_	TraesCS3B02G081100.1	0.9495		3361.32
TRAES3BF091700020CFD_	TraesCS3B02G269100.1	0.764		3360.94
Traes_2DS_0F2500A60.1	TraesCS2D02G011700.1	0.7268	DNA binding domain	3360.83
Traes_2BL_7BC3DF5C7.2	TraesCS2B02G422300.1	0.7642	RWP-RK domain	3360.06
Traes_7AS_A70A185F1.1	TraesCS7A02G095100.1	0.7796	AP2 domain	3359.44
Traes_2AS_FE9AC4EDD.2	TraesCS2A02G215600.1	0.7725	helix loop helix domain	3359.38
Traes_5BL_F3018E8CA.1	TraesCS5B02G470600.1	0.9493	basic region leucin zipper(GBF1)	3358.69
Traes_7AS_89D49F177.1	TraesCS7A02G145800.1	0.8974	AP2 domain	3357.45
Traes_2AS_CD74215DB.1	TraesCS2A02G069300.1	0.9625	Myb-like DNA-binding domain	3357.43
TRAES3BF073600060CFD_	TraesCS3B02G303800.1	0.9439		3357.2
Traes_1DL_F6047634A.1	TraesCS1D02G413400.1	0.7468	Myb-like DNA-binding domain	3356.99
Traes_4BS_5D9291539.1	TraesCS4B02G001200.1	1	Lateral organ boundaries (LOB) domain	3356.5
Traes_2BL_41168D652.2	TraesCS2B02G627700.1	0.2458	zinc finger	3355.88
Traes_4DL_C5FFFD54A.1	TraesCS4D02G176500.1	0.9423	MYB-CC type transfactor, LHEQLE motif	3355.6
Traes_2DL_0D933D88B.1	TraesCS2D02G256400.1	0.8813	sequence-specific DNA binding	3354.32
Traes_7AS_A4B5D1816.1	TraesCS7A02G062700.1	0.7383	B3 domain-containing protein	3353.53
Traes_1BS_80AF77097.1	TraesCS1B02G135600.2	0.9534	regulation of nucleic acid-templated transcription	3352.78
Traes_1BS_80AF770971.	TraesCS1B02G135600.2	0.9534		3352.78
Traes_4DL_63ACC4A09.1	TraesCS4D02G237300.1	0.8292	DNA-binding domain in plant proteins such as APETALA2 and EREBPs	3351.82
Traes_3DS_05E08500B.1	TraesCS3D02G108000.2	0.9372	DIRP	3351.53
Traes_1AL_1A93B0C96.1	TraesCS1A02G366300.1	0.8229	Myb-related protein Hv33	3351.07
Traes_5DL_04FB2797F.2	TraesCS5D02G129900.1	0.9085	GATA zinc finger	3350.35
Traes_2AL_AE22E725E.3	TraesCS2A02G359400.1	0.9585	Histone-like transcription factor (CBF/NF-Y) and archaeal histone	3350.13
Traes_7DS_0A968BA86.2	TraesCS7D02G226400.1	0.9347	Zinc finger C-x8-C-x5-C-x3-H type (and similar)	3349.86
TRAES3BF064300010CFD_	TraesCS3B02G195900.1	0.9611		3349.85
Traes_6BL_0D4DBDD0C.1	TraesCS6B02G310500.2	0.9972	zinc finger	3349.77
Traes_5DL_A54ED44C9.2	TraesCS5D02G390800.1	0.8094	Plant zinc cluster domain(WRKY21)	3349.02
Traes_2AS_1913BF8B3.1	TraesCS2A02G090200.1	0.7297	C2H2-type zinc finger	3348.61
TRAES3BF171300020CFD_	TraesCS3B02G153600.1	1		3348.57
Traes_1BL_C0F4A948C.2	TraesCS1B02G316200.2	0.8123	MYB-CC type transfactor, LHEQLE motif	3348.32
Traes_2DS_035AA95E3.1	TraesCS2D02G156100.1	1	C2H2-type zinc finger	3347.95
Traes_7AL_D89BDD619.1	TraesCS6A02G175800.1	0.7358	DNA-binding transcription factor activity(HY5)	3347.21
Traes_4DS_069F2900B.1	TraesCS4D02G018700.1	0.9045	helix loop helix domain	3346.93
Traes_4DS_ECE3F21FA.1	TraesCS4D02G018700.1	0.9045	helix loop helix domain	3346.93
Traes_4BL_9422485B3.2	TraesCS4D02G171700.2	0.8266	Transcription factor RF2b	3346.54
Traes_3DL_734F1498E.1	TraesCS3D02G292100.1	0.8871	Auxin response factors (ARFs) are transcriptional factors that bind specifically to the DNA sequence 5'-TGTCTC-3' found in the auxin-responsive promoter elements (AuxREs)(ARF3)	3345.48
Traes_2BL_560CCE975.1	TraesCS2B02G467700.1	0.8196	Myb-like DNA-binding domain	3344.96
TRAES3BF054400100CFD_	TraesCS3B02G504800.1	0.9251		3343.91
Traes_6DL_F4FBB448F.2	TraesCS6D02G238400.2	0.8835	zinc finger	3343.86
TRAES3BF107700050CFD_	TraesCS3B02G396100.1	0.7856		3342.4
Traes_3DL_0F82AC8F0.1	TraesCS3D02G358400.1	0.9291	SANT SWI3, ADA2, N-CoR and TFIIIB'' DNA-binding domains	3340.96
Traes_2DL_0B1444B68.2	TraesCS2D02G461700.3	0.8162	Helix-loop-helix DNA-binding domain(PIL6)	3340.77
Traes_2DL_BF4319E7D.1	TraesCS2D02G310500.1	0.7323	zinc finger	3340.37
TRAES3BF072000010CFD_	TraesCS3B02G206400.2	0.8608		3339.48
TRAES3BF072100010CFD_	TraesCS3B02G206400.2	0.8608		3339.48
Traes_3B_2B7B665A9.1	TraesCS3B02G206400.2	0.8608		3339.48
Traes_2AS_D917848B7.1	TraesCS2A02G004700.1	0.9581	glycine rich nucleic binding domain	3337.57
Traes_6AL_B272C86BE.1	TraesCS6A02G378500.1	0.7013	No apical meristem (NAM) protein	3337.21
Traes_7DL_5968FA56C.1	TraesCS7D02G497800.1	0.8832	WRKY transcription factor	3337.11
Traes_2DS_3E4E3BEFC.2	TraesCS2D02G211600.1	0.7698	CW-type Zinc Finger	3337.04
Traes_3AS_9079D6B71.1	TraesCS3A02G341700.1	0.8487	WUSCHEL-related homeobox	3336.13
Traes_4BL_F1BECD544.1	TraesCS4B02G384700.1	0.7163	No apical meristem (NAM) protein	3335.85
Traes_5BS_E0345D5DF.2	TraesCS5B02G066400.1	0.7479	Plant zinc cluster domain	3335.35
TRAES3BF078900060CFD_	TraesCS3B02G378100.1	0.7768		3335.01
Traes_2BL_5EFA85F52.1	TraesCS2B02G390800.1	0.7112	DNA-binding domain in plant proteins such as APETALA2 and EREBPs	3334.53
Traes_6BS_179B5B6E1.1	TraesCS6B02G072200.1	0.9163	Lateral organ boundaries (LOB) domain	3333.54
Traes_6AL_1EDDDC063.1	TraesCS6A02G345400.1	0.9448	SANT SWI3, ADA2, N-CoR and TFIIIB'' DNA-binding domains	3333.37
Traes_7BS_7ACA0B10A.2	TraesCS7B02G115200.1	0.7194	SBP domain(SPL1)	3333.31
Traes_3AS_74E386CE7.1	TraesCS3A02G107400.1	0.9763	No apical meristem (NAM) protein	3333.18
Traes_2DL_25FD0FFB4.1	TraesCS2D02G446000.1	0.7252	Myb-like DNA-binding domain	3332.55
Traes_4AL_A02408BC8.2	TraesCS4A02G423500.1	0.8541	GAGA binding protein-like family	3331.55
Traes_6DL_04EAF750D.1	TraesCS6D02G253000.1	0.9934	helix loop helix domain	3331.36
Traes_6BL_5A2DB8F78.1	TraesCS6B02G349100.1	0.9419	Myb-like DNA-binding domain	3330.77
Traes_3AL_6DE434492.1	TraesCS3A02G538400.1	0.9018	zinc finger binding to DNA consensus sequence [AT]GATA[AG]	3330.24
Traes_1BL_1E9F7A4EF.1	TraesCS1B02G203800.1	0.9882	YABBY protein	3329.39
Traes_2BL_58A855C7B.2	TraesCS2B02G421100.1	0.8502	Zinc-finger double-stranded RNA-binding	3329.13
Traes_3AL_C97D62D50.1	TraesCS3A02G483200.1	0.8937	B3 DNA binding domain	3328.9
Traes_5BL_2131D2B17.1	TraesCS5B02G338400.1	0.7413	No apical meristem (NAM) protein	3328.06
Traes_7DS_3880F0FD0.1	TraesCS7D02G210400.2	0.7146	SBP domain(SPL1)	3328.05
TRAES3BF026500080CFD_	TraesCS3B02G290600.1	0.9111		3327.65
Traes_4DL_C4CB3D5AF.1	TraesCS4D02G346300.1	1	MADS	3326.99
Traes_3AS_9594B1341.2	TraesCS3A02G159200.1	0.7227	Auxin response factors (ARFs) are transcriptional factors that bind specifically to the DNA sequence 5'-TGTCTC-3' found in the auxin-responsive promoter elements (AuxREs)(ARF11)	3326.77
Traes_4AL_FF199F127.1	TraesCS4A02G176200.1	0.9811	Belongs to the GRAS family	3324.75
Traes_2BS_DD07C2EE6.2	TraesCS2B02G212900.1	0.7416	C2H2-type zinc finger	3324.54
Traes_7DL_1D415A4CF.2	TraesCS7D02G540700.3	0.8838	Myb-like DNA-binding domain	3324.08
Traes_3DS_9A02CF31D.1	TraesCS3D02G029100.1	0.9556	disease resistance protein	3323.21
Traes_6AS_2FB24B03E.1	TraesCS6A02G145500.1	0.8835	regulation of nucleic acid-templated transcription	3322.75
Traes_1BL_C664E8E1E.1	TraesCS1B02G215500.1	1	Myb-like DNA-binding domain	3322.71
Traes_4AL_37D98E743.1	TraesCS4A02G207500.1	1	zinc finger	3321.79
Traes_7DS_5100A9609.1	TraesCS7D02G208000.1	0.9385	Myb-like DNA-binding domain	3320.44
Traes_3AL_3FD608E1A.1	TraesCS3A02G532100.1	0.9923	Dof domain, zinc finger	3320.42
Traes_2DL_92641C6CC.2	TraesCS2D02G401400.1	0.7093	RWP-RK domain	3320.25
TRAES3BF005100010CFD_	TraesCS3B02G375700.1	0.8694		3319.96
Traes_6BL_1392D6149.2	TraesCS6B02G231600.3	0.883	Metallo-beta-lactamase superfamily	3317
Traes_4BL_F34EBD618.1	TraesCS4B02G175100.1	0.8947	Ethylene insensitive 3(EIL1)	3316.92
Traes_5DL_90F570468.7	TraesCS5D02G490200.1	1	C2H2-type zinc finger	3316.63
Traes_7BL_A86A9614E.1	TraesCS7B02G426900.1	0.9065	Methyltransferase domain	3316.26
Traes_2BL_DE9A7327E.1	TraesCS2B02G416300.1	0.7717	QLQ	3315.22
Traes_6BL_F5F82174B.2	TraesCS6B02G319500.1	0.9839	B-Box-type zinc finger	3315.03
Traes_7DL_AB55D9F4E.1	TraesCS7D02G458000.1	0.979	SANT SWI3, ADA2, N-CoR and TFIIIB'' DNA-binding domains	3314.87
Traes_7DS_7F8C88C92.2	TraesCS7D02G107000.1	0.8261	transcription regulatory region sequence-specific DNA binding	3314.73
Traes_2AL_0B28B6DBE.1	TraesCS2A02G393500.1	1	DNA-binding domain in plant proteins such as APETALA2 and EREBPs	3314.49
Traes_2BL_C843D1851.1	TraesCS2B02G467900.1	0.8119	Myb-like DNA-binding domain	3314.48
TRAES3BF182900010CFD_	TraesCS3B02G123600.1	0.7735		3313.48
Traes_6DL_8BF29D46C.1	TraesCS6D02G298200.1	0.9789	Myb-like DNA-binding domain	3311.9
Traes_7BL_7F4124E70.1	TraesCS7B02G286600.1	0.9322	MADS-box transcription factor(TM6)	3311.89
Traes_6AS_52AE4A6E2.1	TraesCS6A02G013200.2	0.9492	Myb/SANT-like DNA-binding domain	3311.3
Traes_5BL_4A3874701.1	TraesCS5B02G231300.1	0.8195	homeobox associated leucin zipper(HAT14)	3310.91
Traes_6AS_1FB5A49D7.1	TraesCS6A02G145600.1	1	-	3310.42
Traes_3AL_E3BF20F0D.2	TraesCS3A02G251200.1	0.9444	Myb-like DNA-binding domain	3310.3
TRAES3BF076000070CFD_	TraesCS3D02G251600.1	0.8227		3308.2
Traes_2AL_660616C44.1	TraesCS2A02G456600.1	1	SANT SWI3, ADA2, N-CoR and TFIIIB'' DNA-binding domains	3308.09
Traes_2AS_6EA1E372F.1	TraesCS2A02G140900.1	0.9248	bZIP Maf transcription factor	3308.08
Traes_7AS_376CD50EA.1	TraesCS7B02G009500.1	0.9759	MADS-box transcription factor 25	3307.95
Traes_5DS_3EE830A43.1	TraesCS5D02G048400.1	0.8203	single-stranded telomeric DNA binding	3307.92
Traes_1AL_8BC67B52F.1	TraesCS1A02G411700.1	0.8296	Histone-like transcription factor (CBF/NF-Y) and archaeal histone	3307.2
Traes_2AL_7A37B5232.1	TraesCS2A02G472300.1	1	helix loop helix domain	3307.12
Traes_5BL_36467B9A4.2	TraesCS5B02G277700.1	0.9765	Myb-like DNA-binding domain	3306.12
TRAES3BF004600020CFD_	TraesCSU02G203900.1	1		3304.32
Traes_4AL_405CA738F.1	TraesCS4A02G200800.1	1	domain associated with HOX domains	3304.06
Traes_2BL_0978E2D14.1	TraesCS2B02G530400.1	0.8493	SBP domain	3303.89
Traes_7DS_538404789.2	TraesCS7D02G264600.3	0.7292	helix loop helix domain	3303.06
Traes_4BS_A021316A5.1	TraesCS4A02G241300.1	0.8571	B3 DNA binding domain	3302.16
Traes_7DS_469ED3135.1	TraesCS7D02G181400.1	0.739	Myb-like DNA-binding domain	3301.93
Traes_1DS_A6733B734.1	TraesCS1D02G072900.1	0.7489	DNA binding domain(WRKY25)	3299.77
TRAES3BF012200030CFD_	TraesCS3B02G400200.1	1		3299.23
TRAES3BF012300030CFD_	TraesCS3B02G400200.1	1		3299.23
Traes_3AS_D8AE0A149.1	TraesCS3A02G053900.1	0.9551	transcription, DNA-templated(RAV1)	3299.03
Traes_7DL_AD6EAD1A61.	TraesCS7D02G329200.1	0.9052		3297.73
Traes_7DL_AD6EAD1A6.1	TraesCS7D02G329200.1	0.9052	No apical meristem (NAM) protein	3297.73
Traes_7DS_2452C1E32.1	TraesCS7D02G154200.1	0.9603	Protein CUP-SHAPED COTYLEDON 2	3297.69
Traes_7DL_2D8356B05.1	TraesCS7D02G482300.1	0.7401	Squamosa promoter-binding-like protein	3296.46
Traes_3AS_B4247C855.1	TraesCS3A02G090900.1	0.8163	transcription regulatory region sequence-specific DNA binding	3296.35
Traes_4BS_6A0B5C129.1	TraesCS4B02G093700.1	0.9869	TCP family transcription factor	3295.45
TRAES3BF118300070CFD_	TraesCS3B02G241900.1	0.7937		3295.24
Traes_5AL_8954A60B6.1	TraesCS5A02G153800.1	0.7447	SANT SWI3, ADA2, N-CoR and TFIIIB'' DNA-binding domains	3295.24
Traes_4AL_DACD935B2.1	TraesCS4A02G411900.1	0.8689	Myb-like DNA-binding domain	3294.74
Traes_4BL_8719DBF92.1	TraesCS4B02G072500.1	1	transcription factor KAN4	3294.69
Traes_2AS_6C2F49AE0.1	TraesCS2A02G100800.1	0.7082	Dof domain, zinc finger	3294.16
Traes_5DL_09F1F8F79.1	TraesCS5D02G145800.1	0.9701	DNA binding domain	3294.06
Traes_7DL_CAF83263E.2	TraesCS7D02G315900.3	0.987	MADS-box transcription factor	3293.2
Traes_1BL_4026DC5011.	TraesCS1B02G325400.1	0.9488		3291.96
Traes_4AL_7800B74E3.2	TraesCS4A02G189700.1	0.7031	SANT SWI3, ADA2, N-CoR and TFIIIB'' DNA-binding domains	3291.87
Traes_5BL_3E6B0CD61.1	TraesCS5B02G216300.1	0.7699	zinc finger	3291.8
Traes_4BL_A4D0F4AD6.2	TraesCS4B02G316200.1	0.9545	Lateral organ boundaries (LOB) domain	3291.76
Traes_5AS_0ADC996F5.1	TraesCS5D02G027700.1	0.9937	GATA zinc finger	3291.64
Traes_5AS_7BFB385EF.3	TraesCS5A02G117500.1	0.9722	MADS-box transcription factor	3290.41
Traes_7BL_BF5300D88.1	TraesCS7B02G211600.1	0.8901	Helix-loop-helix DNA-binding domain	3290.02
Traes_1AL_A1EA76E83.2	TraesCS1A02G418200.1	0.9474	zinc finger binding to DNA consensus sequence [AT]GATA[AG]	3290.01
Traes_4DS_C7C37A73D.1	TraesCS4D02G136300.1	0.9733	Belongs to the GRAS family	3289.7
Traes_5DL_230E818AD.2	TraesCS5D02G308600.1	0.8498	basic region leucin zipper	3289.56
Traes_5AL_7164FEAC3.1	TraesCS5B02G224000.1	0.9277	DNA binding domain	3289.35
Traes_5DL_A7B24A017.1	TraesCS5D02G300100.1	0.717	Helix-loop-helix DNA-binding domain	3289.32
Traes_6BS_C53202201.1	TraesCS6B02G142000.1	0.8554	helix loop helix domain	3288.56
TRAES3BF001300030CFD_	TraesCS3B02G375800.1	1		3287.94
Traes_4AS_928691B39.1	TraesCS4A02G138100.1	0.747	Protein of unknown function, DUF573	3287.62
Traes_1DS_55E91A134.2	TraesCS1D02G084200.1	0.9602	helix loop helix domain	3287.5
Traes_2DL_54D11D5E7.1	TraesCS2D02G446400.1	0.8084	Myb-like DNA-binding domain	3287.43
Traes_5DL_6A12758FC.2	TraesCS5D02G406900.1	0.9968	helix loop helix domain	3286.7
Traes_4AL_CAF4E16B5.1	TraesCS4A02G415400.1	1	Lateral organ boundaries (LOB) domain	3285.77
Traes_7BL_096916DC5.1	TraesCS7B02G448000.1	0.84	Basic region leucine zipper	3285.71
Traes_7DL_2A7EF919F.1	TraesCS7D02G308300.1	0.813	Helix-loop-helix DNA-binding domain	3284.83
Traes_5DL_DC941F119.2	TraesCS5D02G496300.3	0.9754	B3 DNA binding domain	3284.25
Traes_4DL_B29067862.2	TraesCS4D02G325800.1	0.9802	NAC domain-containing protein 94	3284.07
Traes_5DL_C93641E43.1	TraesCS5D02G190700.1	1	WRKY transcription factor(WRKY30)	3283.92
Traes_4BS_B7A8F8CD8.1	TraesCS4B02G135000.1	0.9778	DNA-binding transcription factor activity	3283.71
Traes_4BL_D4491E3AB.1	TraesCS4B02G235900.2	0.8158	DNA-binding domain in plant proteins such as APETALA2 and EREBPs	3283.49
Traes_4DS_59A46B69A.1	TraesCS4D02G040100.1	0.7104	teosinte branched 1(TB1)	3283.27
Traes_3AS_4446297C5.1	TraesCS3A02G042900.1	0.8543	Protein of unknown function, DUF573	3282.26
Traes_4BL_B181F1FD2.2	TraesCS4A02G075400.1	0.7083	Myb-like DNA-binding domain	3280.75
Traes_5AS_433D3E526.1	TraesCS5A02G059100.1	0.9853	Plant zinc cluster domain	3278.37
Traes_4DS_CFC487CE5.2	TraesCS4D02G014100.1	0.8794	WRKY DNA -binding domain	3278.18
Traes_6DL_5B1D4DBF5.2	TraesCS6D02G240200.3	1	transcription factor(AGL6)	3277.83
Traes_5BL_F17BA2960.1	TraesCS5B02G297100.1	0.9944	B3 DNA binding domain	3277.82
Traes_1BL_D89A10B05.1	TraesCS5D02G459800.1	0.7831	transcription factor	3277.79
Traes_5DS_011851EE7.1	TraesCS5D02G100700.1	0.9873	Basic region leucine zipper	3277.41
Traes_5DL_7F3ABFDD6.1	TraesCS5D02G383000.1	0.719	CCAAT-Binding transcription Factor	3275.51
Traes_3AS_6626D4A69.1	TraesCS3A02G056100.1	0.9799	SANT SWI3, ADA2, N-CoR and TFIIIB'' DNA-binding domains	3273.96
TRAES3BF074100010CFD_	TraesCS3D02G308000.1	0.7277		3273.58
Traes_2AL_AAEBFA9CC.1	TraesCS7B02G072700.1	0.9863	in StAR and phosphatidylcholine transfer protein	3273.32
Traes_1DS_AAEBFA9CC.1	TraesCS7B02G072700.1	0.9863	in StAR and phosphatidylcholine transfer protein	3273.32
Traes_5BS_FF44610EF1.	TraesCS5B02G094300.1	0.9873		3272.63
Traes_5AS_12F8B3DEF.3	TraesCS5A02G068900.2	0.955	MYB family transcription factor	3271.65
Traes_2AS_239CDF865.1	TraesCS2D02G163700.1	0.7595	RNA polymerase II transcription regulator recruiting activity	3271.5
Traes_5DS_7E44031E8.1	TraesCS5D02G076700.1	0.7541	B3 DNA binding domain	3271.48
Traes_4AS_F9C171219.1	TraesCS4A02G128900.1	1	basic region leucin zipper(AREB3)	3270.67
Traes_6DL_410C5CD3B.1	TraesCS6D02G358700.1	0.8129	GATA zinc finger	3269.99
Traes_7DS_30D2DA7DA.2	TraesCS7D02G222600.1	0.882	SANT SWI3, ADA2, N-CoR and TFIIIB'' DNA-binding domains	3269.77
Traes_1BL_B15990028.1	TraesCS1B02G453200.1	0.8889	DNA binding domain	3269.71
Traes_4DS_AFBE29C20.2	TraesCS4D02G033700.1	0.7698	CCAAT-Binding transcription Factor	3269.31
Traes_2BL_709E67A02.1	TraesCS2B02G564900.1	1	basic region leucin zipper	3269.08
Traes_1DS_E50CDDF05.1	TraesCS1D02G054000.1	1	Homeobox domain	3268.87
Traes_1BL_6F6239DF9.2	TraesCS1D02G419500.1	0.9932	Histone-like transcription factor (CBF/NF-Y) and archaeal histone	3268.59
Traes_1DL_A20157EC5.2	TraesCS1D02G426900.1	0.8842	DnaJ homolog subfamily C member 2	3268.06
Traes_4BL_097D9E8A8.1	TraesCS4B02G286400.1	0.764	Dof domain, zinc finger	3267.49
Traes_5BL_4D65B66E2.1	TraesCS5B02G193200.1	0.8231	DNA-binding domain in plant proteins such as APETALA2 and EREBPs	3266.94
Traes_1DL_CD3D9CDE7.1	TraesCS1B02G307000.1	0.8676	DNA-binding domain in plant proteins such as APETALA2 and EREBPs	3266.53
Traes_6BL_B03A20680.2	TraesCS6B02G271200.3	0.7847	transcription factor	3266.29
Traes_2DL_71F120931.1	TraesCS2A02G311100.1	0.7572	MADS	3265.6
Traes_5DL_E4A6D1889.2	TraesCS5D02G564500.2	0.9563	WRKY DNA -binding domain(WRKY14)	3264.73
Traes_3AS_E0E90B815.2	TraesCS3A02G310500.1	0.9175	transcription, DNA-templated	3264.65
Traes_3AL_00FAACD5D.1	TraesCS3A02G381900.1	0.7949	zinc finger(STOP1)	3264.23
Traes_4DS_B98800798.1	TraesCS4D02G071200.1	0.7563	No apical meristem (NAM) protein	3263.28
TRAES3BF117500140CFD_	TraesCS3A02G395000.1	1		3263.23
TRAES3BF005100020CFD_	TraesCS3B02G375600.1	0.9116		3262.98
Traes_4BL_941E7DE4D.2	TraesCS4B02G240100.1	0.846	Transcriptional activator that binds specific DNA sequence	3262.2
Traes_6BL_99F790D57.1	TraesCS6B02G416500.1	0.5985	No apical meristem (NAM) protein	3261.35
Traes_7BS_D06222817.1	TraesCS7B02G047400.1	0.9379	Myb-like DNA-binding domain	3261.25
Traes_4DL_F512146B2.2	TraesCS4D02G223400.1	0.9025	Histone-like transcription factor (CBF/NF-Y) and archaeal histone	3260.9
Traes_5DL_8FD0CF6B9.2	TraesCS5D02G152700.1	0.9637	Belongs to the GRAS family	3260.68
TRAES3BF075600040CFD_	TraesCS3B02G357600.1	0.7289		3260.64
Traes_5BL_5117B3E2A.2	TraesCS5B02G486900.1	1	Floral homeotic protein	3260.55
Traes_6DS_EF4A57213.1	TraesCS6D02G135500.1	0.7818	Transcriptional activator that binds specific DNA sequence	3259.99
Traes_5DL_46E3AC8D6.1	TraesCS5D02G406500.1	0.7227	DNA binding domain	3259.6
Traes_4BS_9928BD91A.1	TraesCS4B02G098200.1	0.9709	No apical meristem (NAM) protein(NAC5)	3259.14
Traes_2DL_AE270CBAA1.	TraesCS2D02G336300.1	0.9635		3258.25
Traes_2DL_AE270CBAA.1	TraesCS2D02G336300.1	0.9635	No apical meristem (NAM) protein	3258.25
Traes_6DL_0A41F917E.2	TraesCS6D02G321200.1	1	Zinc finger CCCH domain-containing protein	3258.09
Traes_7BL_AE0BEF1BE.1	TraesCS7B02G385700.1	0.997	MYB-CC type transfactor, LHEQLE motif	3256.54
Traes_3AL_64D802655.2	TraesCS3A02G324000.1	0.997	helix loop helix domain	3256.45
Traes_7DL_BDD45DB24.2	TraesCS7D02G302000.1	0.9448	No apical meristem (NAM) protein	3255.84
Traes_6BL_868408DFC.1	TraesCS6B02G244800.1	0.994	helix loop helix domain	3255.8
Traes_2AL_AF9357B4C.1	TraesCS2A02G370700.1	0.7879	Myb-like DNA-binding domain	3255.4
Traes_4BL_5D316DD23.1	TraesCS4B02G292900.1	0.9772	DNA-binding domain in plant proteins such as APETALA2 and EREBPs	3255.39
Traes_7BL_E5CC8C8E7.1	TraesCS7D02G373700.1	0.7168	Ethylene-responsive transcription factor 1	3255.25
Traes_2AL_CC3E5591E.1	TraesCSU02G009800.2	0.8716	Homeobox domain	3255.04
TRAES3BF093300030CFD_	TraesCS3B02G328400.1	0.8147		3254.73
Traes_4AS_1A68F2C29.2	TraesCS4A02G073000.4	0.8417	G-box binding protein MFMR	3254.26
Traes_1AL_91299CB97.1	TraesCS1A02G406600.1	1	Myb-like DNA-binding domain(MYB24)	3254.12
Traes_2BL_0B09B840B.1	TraesCS2B02G411500.1	0.9391	DNA-binding domain in plant proteins such as APETALA2 and EREBPs	3253.77
Traes_4DL_F0BE36C9D.1	TraesCS4D02G175700.1	0.781	No apical meristem (NAM) protein	3253.43
Traes_3AS_794DAF12D.1	TraesCS3A02G056000.1	0.898	SANT SWI3, ADA2, N-CoR and TFIIIB'' DNA-binding domains	3253.3
Traes_4BS_ED206A2BB.1	TraesCS4B02G113400.1	0.8364	basic region leucin zipper	3253.06
Traes_4BS_591F7718A.1	TraesCS4B02G055500.1	0.7772	DNA-binding domain in plant proteins such as APETALA2 and EREBPs	3252.63
Traes_1DS_75AF80583.1	TraesCS1D02G041500.1	0.7	C2H2-type zinc finger	3252.62
Traes_3DS_9A5A4FE3E.1	TraesCS3D02G054300.1	0.9888	zinc finger(STOP1)	3252.27
Traes_4AL_0BB0A30D1.2	TraesCS4A02G255800.1	0.7943	Helix-loop-helix DNA-binding domain	3252.2
Traes_7AS_D145F9822.1	TraesCS7A02G209100.1	0.8286	No apical meristem (NAM) protein	3251.83
Traes_6DS_E6A0BE6CD.1	TraesCS6A02G181400.2	0.8515	AP2 domain	3251.67
Traes_5DL_8ABCB84A7.1	TraesCS5D02G128200.1	0.7098	Myb-like DNA-binding domain	3251.66
Traes_6DL_3019F176A.1	TraesCS6B02G274200.1	0.7431	AP2 domain	3251.35
Traes_2BS_3B6ABF5E6.1	TraesCS2B02G075900.1	0.7373	No apical meristem (NAM) protein	3251.06
Traes_2AL_5EE86C5BC.1	TraesCS2A02G447600.1	0.9195	Myb-like DNA-binding domain	3250.43
Traes_4DL_008F8BBFA.1	TraesCS4B02G245700.1	0.9792	transcription regulatory region sequence-specific DNA binding	3250.33
Traes_1AL_D36224AD9.1	TraesCS1A02G281100.1	0.8733	domain associated with HOX domains	3249.8
Traes_1DS_A0312C264.1	TraesCS1D02G045700.1	0.9189	MADS	3249.59
Traes_4BS_8B4AFA7C2.2	TraesCS4B02G150200.1	0.8501	MADS	3249.43
Traes_3AL_CF481F6AC.1	TraesCS3A02G211500.1	0.7872	single-stranded telomeric DNA binding	3247.8
Traes_5DL_519330E98.2	TraesCS5D02G197600.1	0.8152	CRS1 / YhbY (CRM) domain	3247.46
Traes_5AL_6F77CFB03.2	TraesCS5A02G178600.1	0.9494	MYB-CC type transfactor, LHEQLE motif	3247.09
Traes_7AL_628A69311.1	TraesCS7A02G464800.1	1	No apical meristem (NAM) protein	3247.02
Traes_3DL_C1684BF20.2	TraesCS3D02G407400.1	0.9426	JmjC domain, hydroxylase	3245.83
Traes_2BL_569371098.2	TraesCS2B02G268100.2	0.8278	DNA-binding domain in plant proteins such as APETALA2 and EREBPs	3245.83
Traes_5AL_E644A6A0B.1	TraesCS5A02G156700.1	1	DNA binding domain	3245.74
Traes_7BL_9BCF391CF.2	TraesCS7B02G220200.2	0.987	MADS-box transcription factor	3245.18
Traes_5BL_9627436AE.1	TraesCS5B02G286100.2	0.9802	Agamous-like MADS-box protein AGL9 homolog(MADS4)	3244.71
Traes_1DS_47E2D90AC.1	TraesCS1D02G043300.1	1	Myb-like DNA-binding domain	3243.87
Traes_1DS_47E2D90AC1.	TraesCS1D02G043300.1	1		3243.87
Traes_4DL_A83084AC1.1	TraesCS5A02G516600.1	0.7039	B3 DNA binding domain	3243.66
Traes_2DL_5F686B67C.1	TraesCS2A02G554200.1	0.9756	SANT SWI3, ADA2, N-CoR and TFIIIB'' DNA-binding domains	3242.89
Traes_7AL_67921A952.2	TraesCS7A02G319400.1	1	MADS-box transcription factor	3242.73
TRAES3BF073600100CFD_	TraesCS3D02G269200.1	1		3242.67
Traes_2DL_DA577AF57.1	TraesCS2D02G358300.1	0.7895	Histone-like transcription factor (CBF/NF-Y) and archaeal histone	3242.35
TRAES3BF176500010CFD_	TraesCS2B02G531100.1	0.7055		3242.03
Traes_2BL_FE46FC938.1	TraesCS2B02G542400.2	0.8231	DNA-binding domain in plant proteins such as APETALA2 and EREBPs(AP2)	3241.89
TRAES3BF114300070CFD_	TraesCS3B02G436900.1	0.7985		3241.36
Traes_5AL_41B98AAEF.1	TraesCS5A02G220900.2	0.72	Glycine-rich cell wall structural protein	3241.29
Traes_1AL_2CFFBD60E.2	TraesCS1A02G305500.2	0.7951	MYB-CC type transfactor, LHEQLE motif	3240.99
Traes_4DS_99EC36CD4.1	TraesCS4D02G131500.1	0.9296	Myb-like DNA-binding domain	3240.97
Traes_2BS_CA02DC5B2.1	TraesCS2B02G252000.1	0.7629	Myb-like DNA-binding domain	3240.18
Traes_5BL_096B0BDA8.2	TraesCS5B02G358600.1	0.7655	zinc finger	3240.15
Traes_2BL_260DF778A.1	TraesCS2B02G484100.1	0.9582	No apical meristem (NAM) protein	3238.95
Traes_2DL_70F83D4B9.1	TraesCS2D02G309800.1	0.9278	No apical meristem (NAM) protein	3238.83
Traes_1AL_323AE5FA3.4	TraesCS1A02G354900.1	0.9403	Histone-like transcription factor (CBF/NF-Y) and archaeal histone	3238.33
Traes_2BL_F4302657F.2	TraesCS2B02G323500.1	0.9532	No apical meristem (NAM) protein	3237.97
Traes_5BL_175E7FC38.1	TraesCS5B02G145300.1	0.9644	DNA binding domain	3237.88
Traes_3B_4BDC314A1.1	TraesCS3B02G108500.1	0.9577		3237.81
Traes_4AL_21D75AE88.2	TraesCS4A02G469900.1	1	domain associated with HOX domains	3237.77
Traes_1DL_DFE1721E0.1	TraesCS1D02G300900.1	1	WRKY DNA -binding domain	3237.19
Traes_6DS_DE865EA6D.1	TraesCS6D02G116300.1	0.7717	zinc finger	3236.9
Traes_7BL_5C24556B6.1	TraesCS7B02G377000.1	0.8762	Nuclear transcription factor Y subunit	3236.68
Traes_4AL_75D069945.1	TraesCS4A02G271300.1	0.7134	teosinte branched 1(TB1)	3236.66
Traes_2DL_9D8B5B436.1	TraesCS2D02G270100.1	0.9779	Lateral organ boundaries (LOB) domain	3236.53
Traes_4DS_0FB3F3EE9.1	TraesCS4D02G059600.1	0.7584	developmental process	3236.35
Traes_4DS_0FB3F3EE91.	TraesCS4D02G059600.1	0.7584		3236.35
Traes_4BS_B43A99154.1	TraesCS4B02G316100.1	1	Lateral organ boundaries (LOB) domain	3235.2
Traes_4BL_F71DE14F7.1	TraesCS4B02G316100.1	1	Lateral organ boundaries (LOB) domain	3235.2
Traes_5AL_A66D34380.1	TraesCS5A02G515000.1	0.8756	regulation of nucleic acid-templated transcription	3234.75
Traes_6DS_43372C0A6.2	TraesCS6D02G179200.1	0.867	AP2 domain	3233.45
Traes_6AL_F5BFFCA3E.1	TraesCS6A02G335900.1	0.8659	QLQ	3233.38
Traes_2AS_66F050AC7.1	TraesCS2A02G089300.1	0.7921	heat shock factor	3233.09
Traes_2AS_455BD2CA1.1	TraesCS2A02G200700.1	0.75	Belongs to the GRAS family(SCR)	3232.96
Traes_2DL_95721ADDA.1	TraesCS2D02G473700.1	0.7198	Homeobox-leucine zipper protein	3232.46
Traes_2BS_2A12B5E70.2	TraesCS2B02G082400.1	1	Myb-like DNA-binding domain	3232.01
Traes_1BL_A44464337.1	TraesCS1B02G383600.1	0.7619	RNA polymerase II transcription regulator recruiting activity	3231.51
Traes_5DL_75AEE92BB.1	TraesCS5D02G473000.2	0.9624	basic region leucin zipper(GBF1)	3231.49
Traes_2AL_892B4448E.2	TraesCS2D02G254400.3	0.9195	helix loop helix domain	3231.35
Traes_4DS_0ECE7A421.2	TraesCS4D02G142300.1	0.7094	Myb-like DNA-binding domain	3229.58
Traes_5BL_DF8EC4A24.2	TraesCS5B02G494500.1	0.9631	Belongs to the GRAS family	3229.24
Traes_6DS_9BBDCC9F7.2	TraesCS6A02G158100.1	0.812	RNA polymerase II regulatory region DNA binding	3228.69
Traes_5AL_1A7387EDC.1	TraesCS5A02G506000.1	0.7121	Belongs to the GRAS family	3228.56
Traes_3DL_5F3D20D9F.1	TraesCS3D02G388700.1	0.2	Helix-loop-helix DNA-binding domain	3228.15
Traes_1AL_1B5F51626.1	TraesCS1A02G264300.1	0.7837	MADS-box transcription factor(PI)	3226.97
Traes_5BL_557E7700B.1	TraesCS5B02G141200.1	0.7152	SANT SWI3, ADA2, N-CoR and TFIIIB'' DNA-binding domains	3226.9
Traes_4BL_7E2E98E50.2	TraesCS4B02G229100.2	0.847	G-box binding protein MFMR	3226.21
Traes_6AS_9762AE81D.1	TraesCS6A02G117600.1	1	Homeodomain protein	3225.74
Traes_2BS_E1E541767.1	TraesCS2B02G177900.1	0.9972	Myb-like DNA-binding domain	3225.57
TRAES3BF154600030CFD_	TraesCS3B02G155200.1	0.9742		3224.89
Traes_3AS_8F85243EB.2	TraesCS3A02G000700.1	0.8829	helix loop helix domain	3224.41
Traes_2DL_67F1183B2.1	TraesCS2D02G412900.1	0.8855	Homeobox associated leucine zipper	3223.61
Traes_1AS_8C62DF06E.1	TraesCS7D02G168700.1	0.8082	Homeobox-leucine zipper protein	3223.13
Traes_2BS_F3097F116.1	TraesCS2B02G010500.1	0.7208	DNA binding domain	3222.82
Traes_6DL_8A1342D56.1	TraesCS6D02G362800.1	0.72	No apical meristem (NAM) protein	3222.77
Traes_2AL_AB04643C9.1	TraesCS2A02G326600.1	0.9776	No apical meristem (NAM) protein	3221.99
TRAES3BF099000010CFD_	TraesCS3B02G391200.1	1		3221.55
Traes_3DL_8407DBC44.1	TraesCS3D02G294800.1	0.8105	impB/mucB/samB family	3221.4
Traes_2BS_3B77DC6C3.1	TraesCS2B02G171900.1	0.7954	heat shock factor	3221.26
Traes_2DS_1FE8E9DE9.1	TraesCS2D02G163900.2	1	helix loop helix domain	3221.12
Traes_6BL_AEB13ECDE.2	TraesCS6B02G391100.1	1	helix loop helix domain	3220.18
Traes_7DS_BF90D232B.1	TraesCS7D02G233300.1	0.8022	ubiquitin modification-dependent histone binding	3219.05
Traes_6AS_68775100B.1	TraesCS6A02G080500.1	0.7391	DNA binding domain(WRKY55)	3217.3
Traes_4BL_D10DEA6E9.1	TraesCS4B02G319400.1	0.7642	zinc finger	3217.26
Traes_6DS_3ABDAEE6E.1	TraesCS6D02G107700.1	0.9692	Homeodomain protein	3216.9
TRAES3BF062000020CFD_	TraesCS3D02G480900.1	0.9424		3216.7
Traes_1DL_3F6454D50.2	TraesCS1D02G287500.1	0.8806	Nuclear transcription factor Y subunit	3216.4
Traes_3AL_D0053C177.2	TraesCS3A02G341700.1	0.8235	WUSCHEL-related homeobox	3215.56
Traes_4BL_A48C29364.1	TraesCS4B02G304500.1	0.7195	Helix-loop-helix DNA-binding domain	3215.48
Traes_7AS_8ED861ED7.1	TraesCS7A02G263700.2	0.7438	helix loop helix domain	3215.13
Traes_4AS_124CCE880.2	TraesCS6A02G118800.2	0.9988	GATA zinc finger	3214.63
Traes_1BL_C5FEAF06E.1	TraesCS1B02G439800.1	0.7407	G-box binding protein MFMR(GBF3)	3213.65
Traes_2BL_F38E032331.	TraesCS2B02G469300.1	0.7564		3213.13
Traes_2BL_F38E03233.1	TraesCS2B02G469300.1	0.7564	Helix-loop-helix DNA-binding domain	3213.13
Traes_4BS_3DB087DC8.2	TraesCS4B02G063100.1	0.8627	Associated with HOX	3212.94
Traes_2DL_5C8D8DACA.1	TraesCS2D02G523300.1	0.9615	helix loop helix domain	3211.99
TRAES3BF026200160CFD_	TraesCS3B02G258400.1	0.9957		3211.54
Traes_1AL_F0688BFDE.2	TraesCS1A02G379700.1	1	Myb-like DNA-binding domain	3210.3
Traes_7AL_20FA90AE5.1	TraesCS7D02G543400.1	0.875	Protein CUP-SHAPED COTYLEDON(CUC1)	3210.15
Traes_7DS_E27ECBC6E.1	TraesCS7D02G120400.2	1	Myb-like DNA-binding domain	3210.11
Traes_5BL_46BDE583B.1	TraesCS5B02G177600.1	0.8013	zinc finger	3210.11
Traes_4BL_340D5E00A.1	TraesCS4D02G136200.1	0.7063	Belongs to the GRAS family	3210.03
Traes_7AS_0D2D3DA10.1	TraesCS7A02G194700.1	0.6322	Protein CUP-SHAPED COTYLEDON 2	3209.49
TRAES3BF155500010CFD_	TraesCS3B02G608900.1	0.722		3209.33
Traes_7AS_D5F5D49CA.2	TraesCS7A02G238500.1	0.9542	E2F/DP family winged-helix DNA-binding domain(DEL1)	3209.02
Traes_5DL_B25AF1570.1	TraesCS5D02G415500.1	0.7197	DNA-binding domain in plant proteins such as APETALA2 and EREBPs	3207.34
Traes_2BS_6859C24E5.1	TraesCS2B02G118000.1	0.7009	Dof domain, zinc finger	3207.26
Traes_3B_B1FA3F5F3.1	TraesCS3B02G251700.2	0.8158		3207.09
TRAES3BF034000040CFD_	TraesCS3B02G039100.1	0.7103		3205.73
Traes_7AS_067BEC7B5.1	TraesCS7A02G214800.1	1	Nuclear transcription factor Y subunit	3205.65
Traes_6DL_31D678054.1	TraesCS6D02G343800.1	0.734	AP2 domain	3205.46
Traes_5BL_553BE31FE.1	TraesCS5B02G243000.1	0.7833	helix loop helix domain	3203.04
Traes_1AL_2CAAB9D4A.1	TraesCS1A02G275000.1	0.7586	Dof domain, zinc finger	3202.09
Traes_6BS_25E162197.1	TraesCS6B02G127000.1	0.7571	heat shock factor	3202.01
Traes_7BL_DA7413B04.1	TraesCS7B02G425500.1	0.7627	SANT SWI3, ADA2, N-CoR and TFIIIB'' DNA-binding domains	3201.9
Traes_6DL_EAF038D23.2	TraesCS6D02G245900.2	0.8364	MYB-CC type transfactor, LHEQLE motif	3201.75
Traes_2BL_75FBE2E45.1	TraesCS2B02G381700.1	0.9239	No apical meristem (NAM) protein	3201.66
Traes_2DL_7034372AC.1	TraesCS2D02G337400.1	0.9785	SANT SWI3, ADA2, N-CoR and TFIIIB'' DNA-binding domains	3201.19
Traes_5BL_9CD03DFCE.1	TraesCS5B02G362600.2	0.7248	Myb/SANT-like DNA-binding domain	3200.98
Traes_5BL_34CEC5885.2	TraesCS5B02G292100.1	0.7208	Helix-loop-helix DNA-binding domain	3200.89
Traes_4BS_FE945D2FC.2	TraesCS4B02G079000.1	0.7915	C2H2-type zinc finger	3200.43
Traes_2DL_F600B5FDF.1	TraesCS2D02G431000.1	0.9917	Plant zinc cluster domain(HKT1)	3199.86
Traes_1AS_306BB8CFE.1	TraesCS1A02G072700.1	0.8142	sequence-specific DNA binding	3199.46
Traes_7AS_6A126F5F5.1	TraesCS7D02G135700.1	0.8611	ubiquitin modification-dependent histone binding	3199.15
Traes_5DS_19425E3EE.2	TraesCS5D02G077400.1	1	Zinc finger CCCH domain-containing protein	3198.95
TRAES3BF177400020CFD_	TraesCS3B02G261800.1	0.8173		3198.71
Traes_5BL_9BEB44AEE.2	TraesCS5B02G495900.2	1	B3 DNA binding domain	3198.58
Traes_7DL_999E12D5D.1	TraesCS7D02G378400.1	0.731	MYB-CC type transfactor, LHEQLE motif	3198.13
TRAES3BF265800070CFD_	TraesCS4B02G187000.1	0.9474		3196.84
Traes_2BL_8DEC0EFBF.2	TraesCS2B02G464200.1	0.8411	DNA Binding Domain (C-terminal) Leafy/Floricaula(LFY)	3196.37
Traes_6DL_FECA3FE13.1	TraesCS6D02G217800.1	0.7946	DNA-binding domain in plant proteins such as APETALA2 and EREBPs	3196.14
Traes_7DS_FE8BC1125.1	TraesCS7D02G061300.1	0.8571	GAGA binding protein-like family	3195.75
Traes_6BL_DA93728B3.1	TraesCS6B02G317600.2	0.7521	helix loop helix domain	3195.74
Traes_2BS_10A8CAB27.2	TraesCS2D02G119100.1	0.7937	Myb-like DNA-binding domain(NIGT1)	3195.59
Traes_1BS_EF67E5A24.1	TraesCS1B02G088900.2	0.7412	DNA binding domain(WRKY25)	3195.39
Traes_6AL_1144FC823.2	TraesCS6A02G261100.2	0.8021	Myb-like DNA-binding domain	3194.69
Traes_2BS_58AA829F4.1	TraesCS2B02G228900.2	1	transcription, DNA-templated	3193.46
TRAES3BF108700110CFD_	TraesCS2B02G228900.2	1		3193.46
Traes_4BS_E01AAE6DE.1	TraesCS4B02G125400.1	0.9963	helix loop helix domain	3193.36
TRAES3BF016200140CFD_	TraesCS3B02G320800.1	1		3193.26
Traes_2DS_D2EF60FE1.1	TraesCS2D02G110000.1	0.8931	AP2 domain	3193.03
TRAES3BF071100020CFD_	TraesCS3B02G424500.1	0.9981		3193.01
TRAES3BF084400010CFD_	TraesCS3B02G435700.1	0.7393		3192.61
Traes_4BL_F6C3B5069.1	TraesCS4B02G383300.1	1	sequence-specific DNA binding	3191.81
Traes_4DS_A0186B942.1	TraesCS4D02G108700.1	1	zinc finger	3191.22
Traes_7DS_EB10DBA07.2	TraesCS7A02G014500.1	0.7333	Protein FAR1-RELATED SEQUENCE	3190.27
Traes_5AL_9BC38814C.1	TraesCS5A02G460800.2	1	basic region leucin zipper(GBF1)	3188.15
Traes_1BS_CF75D4172.2	TraesCS1B02G071700.1	0.7732	Zinc finger, C2H2 type	3187.19
Traes_7AS_375BA0ECA.1	TraesCS7A02G185300.1	0.7674	Helix-loop-helix DNA-binding domain	3186.82
Traes_2BL_216652F6B.1	TraesCS2B02G343800.1	0.8817	SANT SWI3, ADA2, N-CoR and TFIIIB'' DNA-binding domains(MYB16)	3186.58
Traes_2AL_097BADCFE.1	TraesCS2A02G552400.1	0.7194	Myb-like DNA-binding domain(MYB16)	3186.29
TRAES3BF019000220CFD_	TraesCS3B02G411300.1	0.786		3185.98
Traes_7BL_EBACA7012.2	TraesCS7A02G014500.1	0.845	Protein FAR1-RELATED SEQUENCE	3185.62
Traes_4AS_73658DB91.1	TraesCS4A02G081000.1	0.8983	Histone-like transcription factor (CBF/NF-Y) and archaeal histone	3185.57
Traes_2AS_B3BC47BB0.1	TraesCS2A02G173500.1	0.9714	Histone-like transcription factor (CBF/NF-Y) and archaeal histone	3184.03
Traes_1AL_180B9CF01.1	TraesCS1D02G429900.1	0.8911	DNA binding domain	3182.88
Traes_2BL_A5BFA97B9.1	TraesCS2B02G410400.1	0.8304	DNA binding domain(WRKY12)	3182.73
Traes_1BL_736D60ADD.1	TraesCS1B02G383900.1	0.8981	Myb-related protein Hv33	3182.46
Traes_7AS_73BC102D3.1	TraesCS7A02G145200.1	0.9907	Myb-like DNA-binding domain	3182.32
Traes_5DL_1CD573458.2	TraesCS5D02G449200.1	0.8686	helix loop helix domain	3182.15
Traes_1BS_2156D66E1.2	TraesCS1B02G091700.1	0.8691	sequence-specific DNA binding	3180.2
Traes_4AL_72ECC7747.1	TraesCS4A02G180900.1	0.9941	Myb-like DNA-binding domain	3179.76
Traes_7BL_6183FA9D4.1	TraesCS7B02G230100.2	0.7067	B3 DNA binding domain	3178.4
Traes_4BL_32D8155C6.1	TraesCS4B02G174600.3	0.7869	MYB-CC type transfactor, LHEQLE motif	3178.38
Traes_2BL_3237AA694.1	TraesCS2B02G378700.1	0.787	Histone-like transcription factor (CBF/NF-Y) and archaeal histone	3178.01
Traes_7AS_15078CC8B.2	TraesCS7D02G257000.2	0.876	helix loop helix domain	3177.92
Traes_1AL_297FBF3A3.1	TraesCS1D02G221000.1	0.8608	SANT SWI3, ADA2, N-CoR and TFIIIB'' DNA-binding domains	3177.87
Traes_1BL_B7F04D24D.1	TraesCS1D02G221000.1	0.8608	SANT SWI3, ADA2, N-CoR and TFIIIB'' DNA-binding domains	3177.87
Traes_2DL_3757D78B3.1	TraesCS2D02G336300.1	0.95	No apical meristem (NAM) protein	3177.07
Traes_2BL_33410A32A.1	TraesCS2B02G419600.1	0.9763	heat shock factor	3176.12
TRAES3BF020100130CFD_	TraesCS3B02G092900.3	0.7522		3176.04
Traes_2AL_E2F8D46CE.2	TraesCS2A02G381900.1	0.7738	Myb-like DNA-binding domain	3175.93
Traes_1AL_2AC682D6D.1	TraesCS1A02G186000.1	0.7769	basic region leucin zipper	3175.49
Traes_5BL_98A6A7CC2.1	TraesCS1B02G265400.1	0.8085	RNA polymerase II transcription regulator recruiting activity	3174.95
Traes_6BS_487628194.1	TraesCS6B02G060700.2	0.8824	helix loop helix domain	3174.86
Traes_5DS_82FA431DB.1	TraesCS5D02G002100.1	0.9103	transcription regulatory region sequence-specific DNA binding	3174.83
Traes_2BS_34669CA7B.1	TraesCS2B02G117800.1	1	MYB-CC type transfactor, LHEQLE motif	3174.49
Traes_5AL_6F7D1D441.1	TraesCS5A02G443600.1	0.7823	Plant zinc cluster domain	3172.95
Traes_6DS_1FC471B7F.1	TraesCS6D02G121500.1	0.7647	Whirly transcription factor	3172.94
TRAES3BF043500070CFD_	TraesCS3B02G000100.1	0.7356		3172.05
Traes_1DL_985BECD17.1	TraesCS1D02G329200.1	0.8929	Tesmin/TSO1-like CXC domain	3171.45
Traes_4BS_E9E0C550B.1	TraesCS4B02G016200.1	0.716	Lateral organ boundaries (LOB) domain	3171.45
Traes_4AL_0A3D7BB7F.1	TraesCS4A02G185900.1	0.9948	Belongs to the GRAS family	3170.44
TRAES3BF009000010CFD_	TraesCS3B02G469700.1	0.8		3170.27
Traes_2AL_BF4D53AA5.1	TraesCS2A02G514000.1	0.7459	Homeobox domain(WOX4)	3169.81
TRAES3BF026100020CFD_	TraesCS3B02G258400.1	1		3169.61
TRAES3BF267200010CFD_	TraesCS3B02G240200.1	0.9665		3167.31
Traes_2DL_D8AD25F43.2	TraesCS2D02G401300.1	0.9548	RWP-RK domain	3166.17
Traes_6AL_779D5240A.2	TraesCS6A02G248700.1	0.8131	C2H2-type zinc finger	3166.09
Traes_4AL_822582A19.1	TraesCS4A02G382200.1	0.7717	homeobox associated leucin zipper	3166.04
Traes_1DS_91D14CD7B.2	TraesCS1D02G075600.1	0.8129	sequence-specific DNA binding	3165.86
Traes_5AL_ED57961C7.1	TraesCS5A02G401300.1	0.8409	helix loop helix domain	3165.56
Traes_2DL_BDECC07BD.2	TraesCS2B02G583800.1	0.926	Myb-like DNA-binding domain(MYB16)	3165.06
Traes_5BL_2E6FA4A97.1	TraesCS5B02G156400.1	0.7249	multicellular organism development	3164.89
Traes_7BS_F67ED5C9E.5	TraesCS7B02G026300.1	0.9415	Helix-loop-helix DNA-binding domain	3164.83
Traes_5DL_591F8EFBD.1	TraesCS5D02G258000.1	0.9378	bZIP transcription factor	3164.73
Traes_2BL_5BA37F95E.1	TraesCS2B02G531100.1	0.7021	AP2 domain	3163.04
Traes_4DS_72ABC3EE5.2	TraesCS4D02G078800.1	0.9823	Lateral organ boundaries (LOB) domain	3161.31
TRAES3BF035300070CFD_	TraesCS3B02G003500.1	1		3160.18
TRAES3BF035700030CFD_	TraesCS3B02G003500.1	1		3160.18
Traes_1DL_D1EC7DEA6.1	TraesCS1D02G429900.1	1	DNA binding domain	3159.41
Traes_7DS_D9008CC09.1	TraesCS7B02G009500.1	0.7045	MADS-box transcription factor 25	3159.18
Traes_4BS_5690C215A.1	TraesCS4B02G129100.1	0.7384	SANT SWI3, ADA2, N-CoR and TFIIIB'' DNA-binding domains	3158.8
Traes_4DS_2A5B4C4C4.1	TraesCS4D02G142900.1	0.7748	Myb-like DNA-binding domain	3158.69
TRAES3BF026000060CFD_	TraesCS3B02G603900.1	1		3157.62
Traes_1BS_C908081B8.1	TraesCS1B02G069000.1	0.962	Homeobox domain	3157.51
Traes_2DL_DCD7B13A8.1	TraesCS2D02G539300.1	0.7518	helix loop helix domain	3157.08
Traes_2BL_35241DE8D.1	TraesCS2B02G387500.1	0.7416	Myb-like DNA-binding domain	3156.79
Traes_3DL_01DA17F63.1	TraesCS3D02G478600.1	0.9168	B3 DNA binding domain	3155.92
Traes_4BL_27B9E4CE6.1	TraesCS4B02G328700.1	0.8824	NAC domain-containing protein 94	3155.13
Traes_1DS_D1F453705.1	TraesCS1D02G041600.1	0.7253	C2H2-type zinc finger	3155.04
TRAES3BF002700090CFD_	TraesCS3B02G333400.1	0.8132		3154.9
Traes_7DL_572EF99CA.1	TraesCS7D02G302800.1	0.7235	Myb-like DNA-binding domain	3154.59
Traes_5AS_6F02C9967.1	TraesCS5A02G020700.1	0.7865	Basic region leucine zipper	3154.54
Traes_7DL_88B60203A.1	TraesCS7D02G304500.1	0.8238	helix loop helix domain	3153.74
Traes_1AL_ED83D13D4.2	TraesCS1A02G176700.2	0.8874	Myb/SANT-like DNA-binding domain	3152.29
Traes_1AL_0404BC790.1	TraesCS1A02G348600.1	0.7863	WRKY DNA -binding domain(WRKY56)	3151.9
Traes_4BS_AAE1439D4.7	TraesCS4A02G291500.1	0.7343	QLQ	3149.13
Traes_6DS_F8DFD036F.2	TraesCS6A02G175800.1	0.7761	DNA-binding transcription factor activity(HY5)	3149
Traes_5AL_D1807A4E0.1	TraesCS5A02G534400.1	0.7358	Myb-like DNA-binding domain	3148.76
Traes_2BL_D50CC6A1D.1	TraesCS2B02G468000.2	0.8333	RNA polymerase II transcription regulator recruiting activity	3148.62
Traes_2BL_D50CC6A1D1.	TraesCS2B02G468000.2	0.8333		3148.62
TRAES3BF075800120CFD_	TraesCS3B02G281500.1	0.7422		3147.33
Traes_6BS_8F1EC63B9.1	TraesCS6B02G159400.1	0.9698	MADS-box transcription factor(TM6)	3147.31
Traes_5DL_D30ADBFDE.1	TraesCS5D02G148700.1	0.9571	bZIP Maf transcription factor	3147.18
Traes_5BL_C94A0F1D4.1	TraesCS5B02G481300.1	0.9024	AP2 domain	3146.69
TRAES3BF003000030CFD_	TraesCS3B02G220400.2	0.997		3146.18
Traes_5DL_36CD3229A.1	TraesCS5D02G149600.1	0.7083	SANT SWI3, ADA2, N-CoR and TFIIIB'' DNA-binding domains	3144.39
Traes_3B_4F4479FAF.1	TraesCS3B02G447100.1	0.9135		3144.26
Traes_3B_5308A06F0.1	TraesCS3A02G142900.1	0.757		3143.83
Traes_4DL_67EFB6303.2	TraesCS4D02G301100.1	0.7108	MADS-box transcription factor	3142.64
Traes_5AL_F6FD8FEFF.1	TraesCS5A02G441900.1	0.9247	helix loop helix domain	3141.91
Traes_6BS_4C945B9F1.1	TraesCS6B02G069200.1	0.596	ethylene-responsive transcription factor	3140.86
Traes_7DL_1913741A8.1	TraesCS7D02G365200.1	0.9548	No apical meristem (NAM) protein	3140.52
Traes_3AL_EF45936CA.1	TraesCS3A02G245900.2	0.8171	No apical meristem (NAM) protein	3140.35
TRAES3BF231500020CFD_	TraesCS3B02G497200.1	0.9958		3140.29
Traes_4AS_669BAF6C7.1	TraesCS4A02G107300.1	0.7703	Lateral organ boundaries (LOB) domain	3140.29
Traes_4AL_8B52D54FD.2	TraesCS4A02G173300.2	0.7009	Myb-like DNA-binding domain	3140.25
Traes_7DL_91CFE828F.1	TraesCS7D02G451700.1	0.9412	No apical meristem (NAM) protein	3140.23
Traes_4AS_200E799021.	TraesCS7A02G014500.1	0.7045		3139.98
Traes_4AS_200E79902.1	TraesCS7A02G014500.1	0.7045	FAR1 DNA-binding domain	3139.98
Traes_5AL_D369204D3.1	TraesCS5A02G237900.1	0.7674	HSF-type DNA-binding	3139.76
Traes_1DS_543CC7DC9.1	TraesCS1D02G075700.1	0.8658	sequence-specific DNA binding	3138.47
Traes_4DL_6598DAF2E.1	TraesCS4D02G291300.1	0.7984	DNA-binding domain in plant proteins such as APETALA2 and EREBPs	3136.97
Traes_4BL_61E35C455.1	TraesCS5A02G512700.1	0.951	Myb-like DNA-binding domain	3133.81
Traes_5BS_BC15EF87A.1	TraesCS5B02G002400.1	0.931	MADS-box transcription factor 25	3133.51
Traes_7DL_15FC3C682.1	TraesCS7B02G240500.1	0.9872	transcription regulatory region sequence-specific DNA binding	3133.18
Traes_6DS_F00EB2E011.	TraesCS6D02G110400.1	0.9167		3133.02
Traes_6DS_F00EB2E01.1	TraesCS6D02G110400.1	0.9167	homeobox-leucine zipper protein HOX26	3133.02
TRAES3BF090300050CFD_	TraesCS3B02G329700.1	0.7398		3132.17
TRAES3BF267500050CFD_	TraesCS3B02G080900.1	0.8236		3131.88
Traes_5DL_1272B4BAC.1	TraesCS5D02G294400.1	0.7962	Squamosa promoter-binding-like protein	3131.85
Traes_4BS_08B2BB48F.1	TraesCS4B02G108000.1	0.8635	basic region leucin zipper	3131.45
Traes_5DL_EFD6D48C0.1	TraesCS5D02G564600.1	0.9681	ubiquitin modification-dependent histone binding	3131.21
Traes_2BL_7AED4E232.1	TraesCS2B02G542600.1	0.7544	Homeobox domain(WOX4)	3131.07
TRAES3BF063900020CFD_	TraesCS3B02G125100.1	1		3130.98
[truncated: 1,399 more rows]
